# Supplementary material for: Scaling of cellular proteome with ploidy
Source: Research Square preprint supplement (doi:10.21203/rs.3.rs-1159832/v1), 2022-01-04
Supplement: Supplementary file 2 [file 880f237ba467477a2dd4fd0f.xlsx]

## Sheet: ReadMe
Caption	Description
1N	normalized log2 ratio L/H (unlabelled 1N to labelled super-silac-mix)
2N	normalized log2 ratio L/H (unlabelled 2N to labelled super-silac-mix)
3N	normalized log2 ratio L/H (unlabelled 3N to labelled super-silac-mix)
4N	normalized log2 ratio L/H (unlabelled 4N to labelled super-silac-mix)
Gene names	Name(s) of the gene(s) associated to the protein(s) contained within the group.
Chromosome	Name of Chromosome, on which the gene is located
Student's T-test significant	Combined T Test significance column, determines significance of XN vs 1N
GOBP name	Biological Process Annotation (Gene Ontology Consortium)
GOCC name	Cellular Compartment Annotation (Gene Ontology Consortium)
Intensity	Summarized raw intensity of protein group
Intensity L	Intensity of light labelled signal
Intensity H	Intensity of heavy labelled signal
-Log Student's T-test p-value 2N_1N	Two sample T Test P-Value 2N vs 1N
Student's T-test q-value 2N_1N	Two sample T Test Q-Value 2N vs 1N
Student's T-test Difference 2N_1N	Two sample T Test Difference between means 2N vs 1N
Student's T-test Test statistic 2N_1N	Two sample T Test Statistic 2N vs 1N
-Log Student's T-test p-value 3N_1N	Two sample T Test P-Value 3N vs 1N
Student's T-test q-value 3N_1N	Two sample T Test Q-Value 3N vs 1N
Student's T-test Difference 3N_1N	Two sample T Test Difference between means 3N vs 1N
Student's T-test Test statistic 3N_1N	Two sample T Test Statistic 3N vs 1N
-Log Student's T-test p-value 4N_1N	Two sample T Test P-Value 4N vs 1N
Student's T-test q-value 4N_1N	Two sample T Test Q-Value 4N vs 1N
Student's T-test Difference 4N_1N	Two sample T Test Difference between means 4N vs 1N
Student's T-test Test statistic 4N_1N	Two sample T Test Statistic 4N vs 1N
-Log Student's T-test combined score	Product of p values as "combined" score
Student's T-test q-value	Combined q value
Protein IDs	Identifier(s) of protein(s) contained in the protein group. They are sorted by number of identified peptides in a descending order.
Majority protein IDs	IDs of the proteins that contain at least half of the peptides that the leading protein has.
Protein names	Name(s) of protein(s) contained within the group.
gene start	Starting position of the gene (bp)
gene end	End position of the gene (bp)
ENSG	Ensembl Gene ID (http://www.ensembl.org/index.html)
1N
2N
3N
4N
Student's T-test Significant 2N_1N
Student's T-test Significant 3N_1N
Student's T-test Significant 4N_1N
Student's T-test significant
GOBP name
GOCC name
Peptides
Razor + unique peptides
Unique peptides
Sequence coverage [%]
Unique + razor sequence coverage [%]
Unique sequence coverage [%]
Mol. weight [kDa]
Q-value
Score
Intensity
Intensity L
Intensity H
-Log Student's T-test p-value 2N_1N
Student's T-test q-value 2N_1N
Student's T-test Difference 2N_1N
Student's T-test Test statistic 2N_1N
-Log Student's T-test p-value 3N_1N
Student's T-test q-value 3N_1N
Student's T-test Difference 3N_1N
Student's T-test Test statistic 3N_1N
-Log Student's T-test p-value 4N_1N
Student's T-test q-value 4N_1N
Student's T-test Difference 4N_1N
Student's T-test Test statistic 4N_1N
-Log Student's T-test combined score
Student's T-test q-value
Protein IDs
Majority protein IDs
Protein names
Gene names
1N
2N
3N
4N
Student's T-test Significant 2N_1N
Student's T-test Significant 3N_1N
Student's T-test Significant 4N_1N
Student's T-test significant
GOBP name
GOCC name
Peptides
Razor + unique peptides
Unique peptides
Sequence coverage [%]
Unique + razor sequence coverage [%]
Unique sequence coverage [%]
Mol. weight [kDa]
Q-value
Score
Intensity
Intensity L
Intensity H
-Log Student's T-test p-value 2N_1N
Student's T-test q-value 2N_1N
Student's T-test Difference 2N_1N
Student's T-test Test statistic 2N_1N
-Log Student's T-test p-value 3N_1N
Student's T-test q-value 3N_1N
Student's T-test Difference 3N_1N
Student's T-test Test statistic 3N_1N
-Log Student's T-test p-value 4N_1N
Student's T-test q-value 4N_1N
Student's T-test Difference 4N_1N
Student's T-test Test statistic 4N_1N
-Log Student's T-test combined score
Student's T-test q-value
Protein IDs
Majority protein IDs
Protein names
Gene names
1N
2N
3N
4N
Student's T-test Significant 2N_1N
Student's T-test Significant 3N_1N
Student's T-test Significant 4N_1N
Student's T-test significant
GOBP name
GOCC name
Peptides
Razor + unique peptides
Unique peptides
Sequence coverage [%]
Unique + razor sequence coverage [%]
Unique sequence coverage [%]
Mol. weight [kDa]
Q-value
Score
Intensity
Intensity L
Intensity H
-Log Student's T-test p-value 2N_1N
Student's T-test q-value 2N_1N
Student's T-test Difference 2N_1N
Student's T-test Test statistic 2N_1N
-Log Student's T-test p-value 3N_1N
Student's T-test q-value 3N_1N
Student's T-test Difference 3N_1N
Student's T-test Test statistic 3N_1N
-Log Student's T-test p-value 4N_1N
Student's T-test q-value 4N_1N
Student's T-test Difference 4N_1N
Student's T-test Test statistic 4N_1N
-Log Student's T-test combined score
Student's T-test q-value
Protein IDs
Majority protein IDs
Protein names
Gene names
1N
2N
3N
4N
Student's T-test Significant 2N_1N
Student's T-test Significant 3N_1N
Student's T-test Significant 4N_1N
Student's T-test significant
GOBP name
GOCC name
Peptides
Razor + unique peptides
Unique peptides
Sequence coverage [%]
Unique + razor sequence coverage [%]
Unique sequence coverage [%]
Mol. weight [kDa]
Q-value
Score
Intensity
Intensity L
Intensity H
-Log Student's T-test p-value 2N_1N
Student's T-test q-value 2N_1N
Student's T-test Difference 2N_1N
Student's T-test Test statistic 2N_1N
-Log Student's T-test p-value 3N_1N
Student's T-test q-value 3N_1N
Student's T-test Difference 3N_1N
Student's T-test Test statistic 3N_1N
-Log Student's T-test p-value 4N_1N
Student's T-test q-value 4N_1N
Student's T-test Difference 4N_1N
Student's T-test Test statistic 4N_1N
-Log Student's T-test combined score
Student's T-test q-value
Protein IDs
Majority protein IDs
Protein names
Gene names
1N
2N
3N
4N
Student's T-test Significant 2N_1N
Student's T-test Significant 3N_1N
Student's T-test Significant 4N_1N
Student's T-test significant
GOBP name
GOCC name
Peptides
Razor + unique peptides
Unique peptides
Sequence coverage [%]
Unique + razor sequence coverage [%]
Unique sequence coverage [%]
Mol. weight [kDa]
Q-value
Score
Intensity
Intensity L
Intensity H
-Log Student's T-test p-value 2N_1N
Student's T-test q-value 2N_1N
Student's T-test Difference 2N_1N
Student's T-test Test statistic 2N_1N
-Log Student's T-test p-value 3N_1N
Student's T-test q-value 3N_1N
Student's T-test Difference 3N_1N
Student's T-test Test statistic 3N_1N
-Log Student's T-test p-value 4N_1N
Student's T-test q-value 4N_1N
Student's T-test Difference 4N_1N
Student's T-test Test statistic 4N_1N
-Log Student's T-test combined score
Student's T-test q-value
Protein IDs
Majority protein IDs
Protein names
Gene names
1N
2N
3N
4N
Student's T-test Significant 2N_1N
Student's T-test Significant 3N_1N
Student's T-test Significant 4N_1N
Student's T-test significant
GOBP name
GOCC name
Peptides
Razor + unique peptides
Unique peptides
Sequence coverage [%]
Unique + razor sequence coverage [%]
Unique sequence coverage [%]
Mol. weight [kDa]
Q-value
Score
Intensity
Intensity L
Intensity H
-Log Student's T-test p-value 2N_1N
Student's T-test q-value 2N_1N
Student's T-test Difference 2N_1N
Student's T-test Test statistic 2N_1N
-Log Student's T-test p-value 3N_1N
Student's T-test q-value 3N_1N
Student's T-test Difference 3N_1N
Student's T-test Test statistic 3N_1N
-Log Student's T-test p-value 4N_1N
Student's T-test q-value 4N_1N
Student's T-test Difference 4N_1N
Student's T-test Test statistic 4N_1N
-Log Student's T-test combined score
Student's T-test q-value
Protein IDs
Majority protein IDs
Protein names
Gene names
1N
2N
3N
4N
Student's T-test Significant 2N_1N
Student's T-test Significant 3N_1N
Student's T-test Significant 4N_1N
Student's T-test significant
GOBP name
GOCC name
Peptides
Razor + unique peptides
Unique peptides
Sequence coverage [%]
Unique + razor sequence coverage [%]
Unique sequence coverage [%]
Mol. weight [kDa]
Q-value
Score
Intensity
Intensity L
Intensity H
-Log Student's T-test p-value 2N_1N
Student's T-test q-value 2N_1N
Student's T-test Difference 2N_1N
Student's T-test Test statistic 2N_1N
-Log Student's T-test p-value 3N_1N
Student's T-test q-value 3N_1N
Student's T-test Difference 3N_1N
Student's T-test Test statistic 3N_1N
-Log Student's T-test p-value 4N_1N
Student's T-test q-value 4N_1N
Student's T-test Difference 4N_1N
Student's T-test Test statistic 4N_1N
-Log Student's T-test combined score
Student's T-test q-value
Protein IDs
Majority protein IDs
Protein names
Gene names
1N
2N
3N
4N
Student's T-test Significant 2N_1N
Student's T-test Significant 3N_1N
Student's T-test Significant 4N_1N
Student's T-test significant
GOBP name
GOCC name
Peptides
Razor + unique peptides
Unique peptides
Sequence coverage [%]
Unique + razor sequence coverage [%]
Unique sequence coverage [%]
Mol. weight [kDa]
Q-value
Score
Intensity
Intensity L
Intensity H
-Log Student's T-test p-value 2N_1N
Student's T-test q-value 2N_1N
Student's T-test Difference 2N_1N
Student's T-test Test statistic 2N_1N
-Log Student's T-test p-value 3N_1N
Student's T-test q-value 3N_1N
Student's T-test Difference 3N_1N
Student's T-test Test statistic 3N_1N
-Log Student's T-test p-value 4N_1N
Student's T-test q-value 4N_1N
Student's T-test Difference 4N_1N
Student's T-test Test statistic 4N_1N
-Log Student's T-test combined score
Student's T-test q-value
Protein IDs
Majority protein IDs
Protein names
Gene names
1N
2N
3N
4N
Student's T-test Significant 2N_1N
Student's T-test Significant 3N_1N
Student's T-test Significant 4N_1N
Student's T-test significant
GOBP name
GOCC name
Peptides
Razor + unique peptides
Unique peptides
Sequence coverage [%]
Unique + razor sequence coverage [%]
Unique sequence coverage [%]
Mol. weight [kDa]
Q-value
Score
Intensity
Intensity L
Intensity H
-Log Student's T-test p-value 2N_1N
Student's T-test q-value 2N_1N
Student's T-test Difference 2N_1N
Student's T-test Test statistic 2N_1N
-Log Student's T-test p-value 3N_1N
Student's T-test q-value 3N_1N
Student's T-test Difference 3N_1N
Student's T-test Test statistic 3N_1N
-Log Student's T-test p-value 4N_1N
Student's T-test q-value 4N_1N
Student's T-test Difference 4N_1N
Student's T-test Test statistic 4N_1N
-Log Student's T-test combined score
Student's T-test q-value
Protein IDs
Majority protein IDs
Protein names
Gene names
1N
2N
3N
4N
Student's T-test Significant 2N_1N
Student's T-test Significant 3N_1N
Student's T-test Significant 4N_1N
Student's T-test significant
GOBP name
GOCC name
Peptides
Razor + unique peptides
Unique peptides
Sequence coverage [%]
Unique + razor sequence coverage [%]
Unique sequence coverage [%]
Mol. weight [kDa]
Q-value
Score
Intensity
Intensity L
Intensity H
-Log Student's T-test p-value 2N_1N
Student's T-test q-value 2N_1N
Student's T-test Difference 2N_1N
Student's T-test Test statistic 2N_1N
-Log Student's T-test p-value 3N_1N
Student's T-test q-value 3N_1N
Student's T-test Difference 3N_1N
Student's T-test Test statistic 3N_1N
-Log Student's T-test p-value 4N_1N
Student's T-test q-value 4N_1N
Student's T-test Difference 4N_1N
Student's T-test Test statistic 4N_1N
-Log Student's T-test combined score
Student's T-test q-value
Protein IDs
Majority protein IDs
Protein names
Gene names
1N
2N
3N
4N
Student's T-test Significant 2N_1N
Student's T-test Significant 3N_1N
Student's T-test Significant 4N_1N
Student's T-test significant
GOBP name
GOCC name
Peptides
Razor + unique peptides
Unique peptides
Sequence coverage [%]
Unique + razor sequence coverage [%]
Unique sequence coverage [%]
Mol. weight [kDa]
Q-value
Score
Intensity
Intensity L
Intensity H
-Log Student's T-test p-value 2N_1N
Student's T-test q-value 2N_1N
Student's T-test Difference 2N_1N
Student's T-test Test statistic 2N_1N
-Log Student's T-test p-value 3N_1N
Student's T-test q-value 3N_1N
Student's T-test Difference 3N_1N
Student's T-test Test statistic 3N_1N
-Log Student's T-test p-value 4N_1N
Student's T-test q-value 4N_1N
Student's T-test Difference 4N_1N
Student's T-test Test statistic 4N_1N
-Log Student's T-test combined score
Student's T-test q-value
Protein IDs
Majority protein IDs
Protein names
Gene names
1N
2N
3N
4N
Student's T-test Significant 2N_1N
Student's T-test Significant 3N_1N
Student's T-test Significant 4N_1N
Student's T-test significant
GOBP name
GOCC name
Peptides
Razor + unique peptides
Unique peptides
Sequence coverage [%]
Unique + razor sequence coverage [%]
Unique sequence coverage [%]
Mol. weight [kDa]
Q-value
Score
Intensity
Intensity L
Intensity H
-Log Student's T-test p-value 2N_1N
Student's T-test q-value 2N_1N
Student's T-test Difference 2N_1N
Student's T-test Test statistic 2N_1N
-Log Student's T-test p-value 3N_1N
Student's T-test q-value 3N_1N
Student's T-test Difference 3N_1N
Student's T-test Test statistic 3N_1N
-Log Student's T-test p-value 4N_1N
Student's T-test q-value 4N_1N
Student's T-test Difference 4N_1N
Student's T-test Test statistic 4N_1N
-Log Student's T-test combined score
Student's T-test q-value
Protein IDs
Majority protein IDs
Protein names
Gene names
1N
2N
3N
4N
Student's T-test Significant 2N_1N
Student's T-test Significant 3N_1N
Student's T-test Significant 4N_1N
Student's T-test significant
GOBP name
GOCC name
Peptides
Razor + unique peptides
Unique peptides
Sequence coverage [%]
Unique + razor sequence coverage [%]
Unique sequence coverage [%]
Mol. weight [kDa]
Q-value
Score
Intensity
Intensity L
Intensity H
-Log Student's T-test p-value 2N_1N
Student's T-test q-value 2N_1N
Student's T-test Difference 2N_1N
Student's T-test Test statistic 2N_1N
-Log Student's T-test p-value 3N_1N
Student's T-test q-value 3N_1N
Student's T-test Difference 3N_1N
Student's T-test Test statistic 3N_1N
-Log Student's T-test p-value 4N_1N
Student's T-test q-value 4N_1N
Student's T-test Difference 4N_1N
Student's T-test Test statistic 4N_1N
-Log Student's T-test combined score
Student's T-test q-value
Protein IDs
Majority protein IDs
Protein names
Gene names
1N
2N
3N
4N
Student's T-test Significant 2N_1N
Student's T-test Significant 3N_1N
Student's T-test Significant 4N_1N
Student's T-test significant
GOBP name
GOCC name
Peptides
Razor + unique peptides
Unique peptides
Sequence coverage [%]
Unique + razor sequence coverage [%]
Unique sequence coverage [%]
Mol. weight [kDa]
Q-value
Score
Intensity
Intensity L
Intensity H
-Log Student's T-test p-value 2N_1N
Student's T-test q-value 2N_1N
Student's T-test Difference 2N_1N
Student's T-test Test statistic 2N_1N
-Log Student's T-test p-value 3N_1N
Student's T-test q-value 3N_1N
Student's T-test Difference 3N_1N
Student's T-test Test statistic 3N_1N
-Log Student's T-test p-value 4N_1N
Student's T-test q-value 4N_1N
Student's T-test Difference 4N_1N
Student's T-test Test statistic 4N_1N
-Log Student's T-test combined score
Student's T-test q-value
Protein IDs
Majority protein IDs
Protein names
Gene names
1N
2N
3N
4N
Student's T-test Significant 2N_1N
Student's T-test Significant 3N_1N
Student's T-test Significant 4N_1N
Student's T-test significant
GOBP name
GOCC name
Peptides
Razor + unique peptides
Unique peptides
Sequence coverage [%]
Unique + razor sequence coverage [%]
Unique sequence coverage [%]
Mol. weight [kDa]
Q-value
Score
Intensity
Intensity L
Intensity H
-Log Student's T-test p-value 2N_1N
Student's T-test q-value 2N_1N
Student's T-test Difference 2N_1N
Student's T-test Test statistic 2N_1N
-Log Student's T-test p-value 3N_1N
Student's T-test q-value 3N_1N
Student's T-test Difference 3N_1N
Student's T-test Test statistic 3N_1N
-Log Student's T-test p-value 4N_1N
Student's T-test q-value 4N_1N
Student's T-test Difference 4N_1N
Student's T-test Test statistic 4N_1N
-Log Student's T-test combined score
Student's T-test q-value
Protein IDs
Majority protein IDs
Protein names
Gene names
1N
2N
3N
4N
Student's T-test Significant 2N_1N
Student's T-test Significant 3N_1N
Student's T-test Significant 4N_1N
Student's T-test significant
GOBP name
GOCC name
Peptides
Razor + unique peptides
Unique peptides
Sequence coverage [%]
Unique + razor sequence coverage [%]
Unique sequence coverage [%]
Mol. weight [kDa]
Q-value
Score
Intensity
Intensity L
Intensity H
-Log Student's T-test p-value 2N_1N
Student's T-test q-value 2N_1N
Student's T-test Difference 2N_1N
Student's T-test Test statistic 2N_1N
-Log Student's T-test p-value 3N_1N
Student's T-test q-value 3N_1N
Student's T-test Difference 3N_1N
Student's T-test Test statistic 3N_1N
-Log Student's T-test p-value 4N_1N
Student's T-test q-value 4N_1N
Student's T-test Difference 4N_1N
Student's T-test Test statistic 4N_1N
-Log Student's T-test combined score
Student's T-test q-value
Protein IDs
Majority protein IDs
Protein names
Gene names
1N
2N
3N
4N
Student's T-test Significant 2N_1N
Student's T-test Significant 3N_1N
Student's T-test Significant 4N_1N
Student's T-test significant
GOBP name
GOCC name
Peptides
Razor + unique peptides
Unique peptides
Sequence coverage [%]
Unique + razor sequence coverage [%]
Unique sequence coverage [%]
Mol. weight [kDa]
Q-value
Score
Intensity
Intensity L
Intensity H
-Log Student's T-test p-value 2N_1N
Student's T-test q-value 2N_1N
Student's T-test Difference 2N_1N
Student's T-test Test statistic 2N_1N
-Log Student's T-test p-value 3N_1N
Student's T-test q-value 3N_1N
Student's T-test Difference 3N_1N
Student's T-test Test statistic 3N_1N
-Log Student's T-test p-value 4N_1N
Student's T-test q-value 4N_1N
Student's T-test Difference 4N_1N
Student's T-test Test statistic 4N_1N
-Log Student's T-test combined score
Student's T-test q-value
Protein IDs
Majority protein IDs
Protein names
Gene names
1N
2N
3N
4N
Student's T-test Significant 2N_1N
Student's T-test Significant 3N_1N
Student's T-test Significant 4N_1N
Student's T-test significant
GOBP name
GOCC name
Peptides
Razor + unique peptides
Unique peptides
Sequence coverage [%]
Unique + razor sequence coverage [%]
Unique sequence coverage [%]
Mol. weight [kDa]
Q-value
Score
Intensity
Intensity L
Intensity H
-Log Student's T-test p-value 2N_1N
Student's T-test q-value 2N_1N
Student's T-test Difference 2N_1N
Student's T-test Test statistic 2N_1N
-Log Student's T-test p-value 3N_1N
Student's T-test q-value 3N_1N
Student's T-test Difference 3N_1N
Student's T-test Test statistic 3N_1N
-Log Student's T-test p-value 4N_1N
Student's T-test q-value 4N_1N
Student's T-test Difference 4N_1N
Student's T-test Test statistic 4N_1N
-Log Student's T-test combined score
Student's T-test q-value
Protein IDs
Majority protein IDs
Protein names
Gene names
1N
2N
3N
4N
Student's T-test Significant 2N_1N
Student's T-test Significant 3N_1N
Student's T-test Significant 4N_1N
Student's T-test significant
GOBP name
GOCC name
Peptides
Razor + unique peptides
Unique peptides
Sequence coverage [%]
Unique + razor sequence coverage [%]
Unique sequence coverage [%]
Mol. weight [kDa]
Q-value
Score
Intensity
Intensity L
Intensity H
-Log Student's T-test p-value 2N_1N
Student's T-test q-value 2N_1N
Student's T-test Difference 2N_1N
Student's T-test Test statistic 2N_1N
-Log Student's T-test p-value 3N_1N
Student's T-test q-value 3N_1N
Student's T-test Difference 3N_1N
Student's T-test Test statistic 3N_1N
-Log Student's T-test p-value 4N_1N
Student's T-test q-value 4N_1N
Student's T-test Difference 4N_1N
Student's T-test Test statistic 4N_1N
-Log Student's T-test combined score
Student's T-test q-value
Protein IDs
Majority protein IDs
Protein names
Gene names
1N
2N
3N
4N
Student's T-test Significant 2N_1N
Student's T-test Significant 3N_1N
Student's T-test Significant 4N_1N
Student's T-test significant
GOBP name
GOCC name
Peptides
Razor + unique peptides
Unique peptides
Sequence coverage [%]
Unique + razor sequence coverage [%]
Unique sequence coverage [%]
Mol. weight [kDa]
Q-value
Score
Intensity
Intensity L
Intensity H
-Log Student's T-test p-value 2N_1N
Student's T-test q-value 2N_1N
Student's T-test Difference 2N_1N
Student's T-test Test statistic 2N_1N
-Log Student's T-test p-value 3N_1N
Student's T-test q-value 3N_1N
Student's T-test Difference 3N_1N
Student's T-test Test statistic 3N_1N
-Log Student's T-test p-value 4N_1N
Student's T-test q-value 4N_1N
Student's T-test Difference 4N_1N
Student's T-test Test statistic 4N_1N
-Log Student's T-test combined score
Student's T-test q-value
Protein IDs
Majority protein IDs
Protein names
Gene names
1N
2N
3N
4N
Student's T-test Significant 2N_1N
Student's T-test Significant 3N_1N
Student's T-test Significant 4N_1N
Student's T-test significant
GOBP name
GOCC name
Peptides
Razor + unique peptides
Unique peptides
Sequence coverage [%]
Unique + razor sequence coverage [%]
Unique sequence coverage [%]
Mol. weight [kDa]
Q-value
Score
Intensity
Intensity L
Intensity H
-Log Student's T-test p-value 2N_1N
Student's T-test q-value 2N_1N
Student's T-test Difference 2N_1N
Student's T-test Test statistic 2N_1N
-Log Student's T-test p-value 3N_1N
Student's T-test q-value 3N_1N
Student's T-test Difference 3N_1N
Student's T-test Test statistic 3N_1N
-Log Student's T-test p-value 4N_1N
Student's T-test q-value 4N_1N
Student's T-test Difference 4N_1N
Student's T-test Test statistic 4N_1N
-Log Student's T-test combined score
Student's T-test q-value
Protein IDs
Majority protein IDs
Protein names
Gene names
1N
2N
3N
4N
Student's T-test Significant 2N_1N
Student's T-test Significant 3N_1N
Student's T-test Significant 4N_1N
Student's T-test significant
GOBP name
GOCC name
Peptides
Razor + unique peptides
Unique peptides
Sequence coverage [%]
Unique + razor sequence coverage [%]
Unique sequence coverage [%]
Mol. weight [kDa]
Q-value
Score
Intensity
Intensity L
Intensity H
-Log Student's T-test p-value 2N_1N
Student's T-test q-value 2N_1N
Student's T-test Difference 2N_1N
Student's T-test Test statistic 2N_1N
-Log Student's T-test p-value 3N_1N
Student's T-test q-value 3N_1N
Student's T-test Difference 3N_1N
Student's T-test Test statistic 3N_1N
-Log Student's T-test p-value 4N_1N
Student's T-test q-value 4N_1N
Student's T-test Difference 4N_1N
Student's T-test Test statistic 4N_1N
-Log Student's T-test combined score
Student's T-test q-value
Protein IDs
Majority protein IDs
Protein names
Gene names
1N
2N
3N
4N
Student's T-test Significant 2N_1N
Student's T-test Significant 3N_1N
Student's T-test Significant 4N_1N
Student's T-test significant
GOBP name
GOCC name
Peptides
Razor + unique peptides
Unique peptides
Sequence coverage [%]
Unique + razor sequence coverage [%]
Unique sequence coverage [%]
Mol. weight [kDa]
Q-value
Score
Intensity
Intensity L
Intensity H
-Log Student's T-test p-value 2N_1N
Student's T-test q-value 2N_1N
Student's T-test Difference 2N_1N
Student's T-test Test statistic 2N_1N
-Log Student's T-test p-value 3N_1N
Student's T-test q-value 3N_1N
Student's T-test Difference 3N_1N
Student's T-test Test statistic 3N_1N
-Log Student's T-test p-value 4N_1N
Student's T-test q-value 4N_1N
Student's T-test Difference 4N_1N
Student's T-test Test statistic 4N_1N
-Log Student's T-test combined score
Student's T-test q-value
Protein IDs
Majority protein IDs
Protein names
Gene names
1N
2N
3N
4N
Student's T-test Significant 2N_1N
Student's T-test Significant 3N_1N
Student's T-test Significant 4N_1N
Student's T-test significant
GOBP name
GOCC name
Peptides
Razor + unique peptides
Unique peptides
Sequence coverage [%]
Unique + razor sequence coverage [%]
Unique sequence coverage [%]
Mol. weight [kDa]
Q-value
Score
Intensity
Intensity L
Intensity H
-Log Student's T-test p-value 2N_1N
Student's T-test q-value 2N_1N
Student's T-test Difference 2N_1N
Student's T-test Test statistic 2N_1N
-Log Student's T-test p-value 3N_1N
Student's T-test q-value 3N_1N
Student's T-test Difference 3N_1N
Student's T-test Test statistic 3N_1N
-Log Student's T-test p-value 4N_1N
Student's T-test q-value 4N_1N
Student's T-test Difference 4N_1N
Student's T-test Test statistic 4N_1N
-Log Student's T-test combined score
Student's T-test q-value
Protein IDs
Majority protein IDs
Protein names
Gene names
1N
2N
3N
4N
Student's T-test Significant 2N_1N
Student's T-test Significant 3N_1N
Student's T-test Significant 4N_1N
Student's T-test significant
GOBP name
GOCC name
Peptides
Razor + unique peptides
Unique peptides
Sequence coverage [%]
Unique + razor sequence coverage [%]
Unique sequence coverage [%]
Mol. weight [kDa]
Q-value
Score
Intensity
Intensity L
Intensity H
-Log Student's T-test p-value 2N_1N
Student's T-test q-value 2N_1N
Student's T-test Difference 2N_1N
Student's T-test Test statistic 2N_1N
-Log Student's T-test p-value 3N_1N
Student's T-test q-value 3N_1N
Student's T-test Difference 3N_1N
Student's T-test Test statistic 3N_1N
-Log Student's T-test p-value 4N_1N
Student's T-test q-value 4N_1N
Student's T-test Difference 4N_1N
Student's T-test Test statistic 4N_1N
-Log Student's T-test combined score
Student's T-test q-value
Protein IDs
Majority protein IDs
Protein names
Gene names
1N
2N
3N
4N
Student's T-test Significant 2N_1N
Student's T-test Significant 3N_1N
Student's T-test Significant 4N_1N
Student's T-test significant
GOBP name
GOCC name
Peptides
Razor + unique peptides
Unique peptides
Sequence coverage [%]
Unique + razor sequence coverage [%]
Unique sequence coverage [%]
Mol. weight [kDa]
Q-value
Score
Intensity
Intensity L
Intensity H
-Log Student's T-test p-value 2N_1N
Student's T-test q-value 2N_1N
Student's T-test Difference 2N_1N
Student's T-test Test statistic 2N_1N
-Log Student's T-test p-value 3N_1N
Student's T-test q-value 3N_1N
Student's T-test Difference 3N_1N
Student's T-test Test statistic 3N_1N
-Log Student's T-test p-value 4N_1N
Student's T-test q-value 4N_1N
Student's T-test Difference 4N_1N
Student's T-test Test statistic 4N_1N
-Log Student's T-test combined score
Student's T-test q-value
Protein IDs
Majority protein IDs
Protein names
Gene names
1N
2N
3N
4N
Student's T-test Significant 2N_1N
Student's T-test Significant 3N_1N
Student's T-test Significant 4N_1N
Student's T-test significant
GOBP name
GOCC name
Peptides
Razor + unique peptides
Unique peptides
Sequence coverage [%]
Unique + razor sequence coverage [%]
Unique sequence coverage [%]
Mol. weight [kDa]
Q-value
Score
Intensity
Intensity L
Intensity H
-Log Student's T-test p-value 2N_1N
Student's T-test q-value 2N_1N
Student's T-test Difference 2N_1N
Student's T-test Test statistic 2N_1N
-Log Student's T-test p-value 3N_1N
Student's T-test q-value 3N_1N
Student's T-test Difference 3N_1N
Student's T-test Test statistic 3N_1N
-Log Student's T-test p-value 4N_1N
Student's T-test q-value 4N_1N
Student's T-test Difference 4N_1N
Student's T-test Test statistic 4N_1N
-Log Student's T-test combined score
Student's T-test q-value
Protein IDs
Majority protein IDs
Protein names
Gene names
1N
2N
3N
4N
Student's T-test Significant 2N_1N
Student's T-test Significant 3N_1N
Student's T-test Significant 4N_1N
Student's T-test significant
GOBP name
GOCC name
Peptides
Razor + unique peptides
Unique peptides
Sequence coverage [%]
Unique + razor sequence coverage [%]
Unique sequence coverage [%]
Mol. weight [kDa]
Q-value
Score
Intensity
Intensity L
Intensity H
-Log Student's T-test p-value 2N_1N
Student's T-test q-value 2N_1N
Student's T-test Difference 2N_1N
Student's T-test Test statistic 2N_1N
-Log Student's T-test p-value 3N_1N
Student's T-test q-value 3N_1N
Student's T-test Difference 3N_1N
Student's T-test Test statistic 3N_1N
-Log Student's T-test p-value 4N_1N
Student's T-test q-value 4N_1N
Student's T-test Difference 4N_1N
Student's T-test Test statistic 4N_1N
-Log Student's T-test combined score
Student's T-test q-value
Protein IDs
Majority protein IDs
Protein names
Gene names
1N
2N
3N
4N
Student's T-test Significant 2N_1N
Student's T-test Significant 3N_1N
Student's T-test Significant 4N_1N
Student's T-test significant
GOBP name
GOCC name
Peptides
Razor + unique peptides
Unique peptides
Sequence coverage [%]
Unique + razor sequence coverage [%]
Unique sequence coverage [%]
Mol. weight [kDa]
Q-value
Score
Intensity
Intensity L
Intensity H
-Log Student's T-test p-value 2N_1N
Student's T-test q-value 2N_1N
Student's T-test Difference 2N_1N
Student's T-test Test statistic 2N_1N
-Log Student's T-test p-value 3N_1N
Student's T-test q-value 3N_1N
Student's T-test Difference 3N_1N
Student's T-test Test statistic 3N_1N
-Log Student's T-test p-value 4N_1N
Student's T-test q-value 4N_1N
Student's T-test Difference 4N_1N
Student's T-test Test statistic 4N_1N
-Log Student's T-test combined score
Student's T-test q-value
Protein IDs
Majority protein IDs
Protein names
Gene names
1N
2N
3N
4N
Student's T-test Significant 2N_1N
Student's T-test Significant 3N_1N
Student's T-test Significant 4N_1N
Student's T-test significant
GOBP name
GOCC name
Peptides
Razor + unique peptides
Unique peptides
Sequence coverage [%]
Unique + razor sequence coverage [%]
Unique sequence coverage [%]
Mol. weight [kDa]
Q-value
Score
Intensity
Intensity L
Intensity H
-Log Student's T-test p-value 2N_1N
Student's T-test q-value 2N_1N
Student's T-test Difference 2N_1N
Student's T-test Test statistic 2N_1N
-Log Student's T-test p-value 3N_1N
Student's T-test q-value 3N_1N
Student's T-test Difference 3N_1N
Student's T-test Test statistic 3N_1N
-Log Student's T-test p-value 4N_1N
Student's T-test q-value 4N_1N
Student's T-test Difference 4N_1N
Student's T-test Test statistic 4N_1N
-Log Student's T-test combined score
Student's T-test q-value
Protein IDs
Majority protein IDs
Protein names
Gene names
1N
2N
3N
4N
Student's T-test Significant 2N_1N
Student's T-test Significant 3N_1N
Student's T-test Significant 4N_1N
Student's T-test significant
GOBP name
GOCC name
Peptides
Razor + unique peptides
Unique peptides
Sequence coverage [%]
Unique + razor sequence coverage [%]
Unique sequence coverage [%]
Mol. weight [kDa]
Q-value
Score
Intensity
Intensity L
Intensity H
-Log Student's T-test p-value 2N_1N
Student's T-test q-value 2N_1N
Student's T-test Difference 2N_1N
Student's T-test Test statistic 2N_1N
-Log Student's T-test p-value 3N_1N
Student's T-test q-value 3N_1N
Student's T-test Difference 3N_1N
Student's T-test Test statistic 3N_1N
-Log Student's T-test p-value 4N_1N
Student's T-test q-value 4N_1N
Student's T-test Difference 4N_1N
Student's T-test Test statistic 4N_1N
-Log Student's T-test combined score
Student's T-test q-value
Protein IDs
Majority protein IDs
Protein names
Gene names
1N
2N
3N
4N
Student's T-test Significant 2N_1N
Student's T-test Significant 3N_1N
Student's T-test Significant 4N_1N
Student's T-test significant
GOBP name
GOCC name
Peptides
Razor + unique peptides
Unique peptides
Sequence coverage [%]
Unique + razor sequence coverage [%]
Unique sequence coverage [%]
Mol. weight [kDa]
Q-value
Score
Intensity
Intensity L
Intensity H
-Log Student's T-test p-value 2N_1N
Student's T-test q-value 2N_1N
Student's T-test Difference 2N_1N
Student's T-test Test statistic 2N_1N
-Log Student's T-test p-value 3N_1N
Student's T-test q-value 3N_1N
Student's T-test Difference 3N_1N
Student's T-test Test statistic 3N_1N
-Log Student's T-test p-value 4N_1N
Student's T-test q-value 4N_1N
Student's T-test Difference 4N_1N
Student's T-test Test statistic 4N_1N
-Log Student's T-test combined score
Student's T-test q-value
Protein IDs
Majority protein IDs
Protein names
Gene names
1N
2N
3N
4N
Student's T-test Significant 2N_1N
Student's T-test Significant 3N_1N
Student's T-test Significant 4N_1N
Student's T-test significant
GOBP name
GOCC name
Peptides
Razor + unique peptides
Unique peptides
Sequence coverage [%]
Unique + razor sequence coverage [%]
Unique sequence coverage [%]
Mol. weight [kDa]
Q-value
Score
Intensity
Intensity L
Intensity H
-Log Student's T-test p-value 2N_1N
Student's T-test q-value 2N_1N
Student's T-test Difference 2N_1N
Student's T-test Test statistic 2N_1N
-Log Student's T-test p-value 3N_1N
Student's T-test q-value 3N_1N
Student's T-test Difference 3N_1N
Student's T-test Test statistic 3N_1N
-Log Student's T-test p-value 4N_1N
Student's T-test q-value 4N_1N
Student's T-test Difference 4N_1N
Student's T-test Test statistic 4N_1N
-Log Student's T-test combined score
Student's T-test q-value
Protein IDs
Majority protein IDs
Protein names
Gene names
1N
2N
3N
4N
Student's T-test Significant 2N_1N
Student's T-test Significant 3N_1N
Student's T-test Significant 4N_1N
Student's T-test significant
GOBP name
GOCC name
Peptides
Razor + unique peptides
Unique peptides
Sequence coverage [%]
Unique + razor sequence coverage [%]
Unique sequence coverage [%]
Mol. weight [kDa]
Q-value
Score
Intensity
Intensity L
Intensity H
-Log Student's T-test p-value 2N_1N
Student's T-test q-value 2N_1N
Student's T-test Difference 2N_1N
Student's T-test Test statistic 2N_1N
-Log Student's T-test p-value 3N_1N
Student's T-test q-value 3N_1N
Student's T-test Difference 3N_1N
Student's T-test Test statistic 3N_1N
-Log Student's T-test p-value 4N_1N
Student's T-test q-value 4N_1N
Student's T-test Difference 4N_1N
Student's T-test Test statistic 4N_1N
-Log Student's T-test combined score
Student's T-test q-value
Protein IDs
Majority protein IDs
Protein names
Gene names
1N
2N
3N
4N
Student's T-test Significant 2N_1N
Student's T-test Significant 3N_1N
Student's T-test Significant 4N_1N
Student's T-test significant
GOBP name
GOCC name
Peptides
Razor + unique peptides
Unique peptides
Sequence coverage [%]
Unique + razor sequence coverage [%]
Unique sequence coverage [%]
Mol. weight [kDa]
Q-value
Score
Intensity
Intensity L
Intensity H
-Log Student's T-test p-value 2N_1N
Student's T-test q-value 2N_1N
Student's T-test Difference 2N_1N
Student's T-test Test statistic 2N_1N
-Log Student's T-test p-value 3N_1N
Student's T-test q-value 3N_1N
Student's T-test Difference 3N_1N
Student's T-test Test statistic 3N_1N
-Log Student's T-test p-value 4N_1N
Student's T-test q-value 4N_1N
Student's T-test Difference 4N_1N
Student's T-test Test statistic 4N_1N
-Log Student's T-test combined score
Student's T-test q-value
Protein IDs
Majority protein IDs
Protein names
Gene names
1N
2N
3N
4N
Student's T-test Significant 2N_1N
Student's T-test Significant 3N_1N
Student's T-test Significant 4N_1N
Student's T-test significant
GOBP name
GOCC name
Peptides
Razor + unique peptides
Unique peptides
Sequence coverage [%]
Unique + razor sequence coverage [%]
Unique sequence coverage [%]
Mol. weight [kDa]
Q-value
Score
Intensity
Intensity L
Intensity H
-Log Student's T-test p-value 2N_1N
Student's T-test q-value 2N_1N
Student's T-test Difference 2N_1N
Student's T-test Test statistic 2N_1N
-Log Student's T-test p-value 3N_1N
Student's T-test q-value 3N_1N
Student's T-test Difference 3N_1N
Student's T-test Test statistic 3N_1N
-Log Student's T-test p-value 4N_1N
Student's T-test q-value 4N_1N
Student's T-test Difference 4N_1N
Student's T-test Test statistic 4N_1N
-Log Student's T-test combined score
Student's T-test q-value
Protein IDs
Majority protein IDs
Protein names
Gene names
1N
2N
3N
4N
Student's T-test Significant 2N_1N
Student's T-test Significant 3N_1N
Student's T-test Significant 4N_1N
Student's T-test significant
GOBP name
GOCC name
Peptides
Razor + unique peptides
Unique peptides
Sequence coverage [%]
Unique + razor sequence coverage [%]
Unique sequence coverage [%]
Mol. weight [kDa]
Q-value
Score
Intensity
Intensity L
Intensity H
-Log Student's T-test p-value 2N_1N
Student's T-test q-value 2N_1N
Student's T-test Difference 2N_1N
Student's T-test Test statistic 2N_1N
-Log Student's T-test p-value 3N_1N
Student's T-test q-value 3N_1N
Student's T-test Difference 3N_1N
Student's T-test Test statistic 3N_1N
-Log Student's T-test p-value 4N_1N
Student's T-test q-value 4N_1N
Student's T-test Difference 4N_1N
Student's T-test Test statistic 4N_1N
-Log Student's T-test combined score
Student's T-test q-value
Protein IDs
Majority protein IDs
Protein names
Gene names
1N
2N
3N
4N
Student's T-test Significant 2N_1N
Student's T-test Significant 3N_1N
Student's T-test Significant 4N_1N
Student's T-test significant
GOBP name
GOCC name
Peptides
Razor + unique peptides
Unique peptides
Sequence coverage [%]
Unique + razor sequence coverage [%]
Unique sequence coverage [%]
Mol. weight [kDa]
Q-value
Score
Intensity
Intensity L
Intensity H
-Log Student's T-test p-value 2N_1N
Student's T-test q-value 2N_1N
Student's T-test Difference 2N_1N
Student's T-test Test statistic 2N_1N
-Log Student's T-test p-value 3N_1N
Student's T-test q-value 3N_1N
Student's T-test Difference 3N_1N
Student's T-test Test statistic 3N_1N
-Log Student's T-test p-value 4N_1N
Student's T-test q-value 4N_1N
Student's T-test Difference 4N_1N
Student's T-test Test statistic 4N_1N
-Log Student's T-test combined score
Student's T-test q-value
Protein IDs
Majority protein IDs
Protein names
Gene names
1N
2N
3N
4N
Student's T-test Significant 2N_1N
Student's T-test Significant 3N_1N
Student's T-test Significant 4N_1N
Student's T-test significant
GOBP name
GOCC name
Peptides
Razor + unique peptides
Unique peptides
Sequence coverage [%]
Unique + razor sequence coverage [%]
Unique sequence coverage [%]
Mol. weight [kDa]
Q-value
Score
Intensity
Intensity L
Intensity H
-Log Student's T-test p-value 2N_1N
Student's T-test q-value 2N_1N
Student's T-test Difference 2N_1N
Student's T-test Test statistic 2N_1N
-Log Student's T-test p-value 3N_1N
Student's T-test q-value 3N_1N
Student's T-test Difference 3N_1N
Student's T-test Test statistic 3N_1N
-Log Student's T-test p-value 4N_1N
Student's T-test q-value 4N_1N
Student's T-test Difference 4N_1N
Student's T-test Test statistic 4N_1N
-Log Student's T-test combined score
Student's T-test q-value
Protein IDs
Majority protein IDs
Protein names
Gene names
1N
2N
3N
4N
Student's T-test Significant 2N_1N
Student's T-test Significant 3N_1N
Student's T-test Significant 4N_1N
Student's T-test significant
GOBP name
GOCC name
Peptides
Razor + unique peptides
Unique peptides
Sequence coverage [%]
Unique + razor sequence coverage [%]
Unique sequence coverage [%]
Mol. weight [kDa]
Q-value
Score
Intensity
Intensity L
Intensity H
-Log Student's T-test p-value 2N_1N
Student's T-test q-value 2N_1N
Student's T-test Difference 2N_1N
Student's T-test Test statistic 2N_1N
-Log Student's T-test p-value 3N_1N
Student's T-test q-value 3N_1N
Student's T-test Difference 3N_1N
Student's T-test Test statistic 3N_1N
-Log Student's T-test p-value 4N_1N
Student's T-test q-value 4N_1N
Student's T-test Difference 4N_1N
Student's T-test Test statistic 4N_1N
-Log Student's T-test combined score
Student's T-test q-value
Protein IDs
Majority protein IDs
Protein names
Gene names
1N
2N
3N
4N
Student's T-test Significant 2N_1N
Student's T-test Significant 3N_1N
Student's T-test Significant 4N_1N
Student's T-test significant
GOBP name
GOCC name
Peptides
Razor + unique peptides
Unique peptides
Sequence coverage [%]
Unique + razor sequence coverage [%]
Unique sequence coverage [%]
Mol. weight [kDa]
Q-value
Score
Intensity
Intensity L
Intensity H
-Log Student's T-test p-value 2N_1N
Student's T-test q-value 2N_1N
Student's T-test Difference 2N_1N
Student's T-test Test statistic 2N_1N
-Log Student's T-test p-value 3N_1N
Student's T-test q-value 3N_1N
Student's T-test Difference 3N_1N
Student's T-test Test statistic 3N_1N
-Log Student's T-test p-value 4N_1N
Student's T-test q-value 4N_1N
Student's T-test Difference 4N_1N
Student's T-test Test statistic 4N_1N
-Log Student's T-test combined score
Student's T-test q-value
Protein IDs
Majority protein IDs
Protein names
Gene names
1N
2N
3N
4N
Student's T-test Significant 2N_1N
Student's T-test Significant 3N_1N
Student's T-test Significant 4N_1N
Student's T-test significant
GOBP name
GOCC name
Peptides
Razor + unique peptides
Unique peptides
Sequence coverage [%]
Unique + razor sequence coverage [%]
Unique sequence coverage [%]
Mol. weight [kDa]
Q-value
Score
Intensity
Intensity L
Intensity H
-Log Student's T-test p-value 2N_1N
Student's T-test q-value 2N_1N
Student's T-test Difference 2N_1N
Student's T-test Test statistic 2N_1N
-Log Student's T-test p-value 3N_1N
Student's T-test q-value 3N_1N
Student's T-test Difference 3N_1N
Student's T-test Test statistic 3N_1N
-Log Student's T-test p-value 4N_1N
Student's T-test q-value 4N_1N
Student's T-test Difference 4N_1N
Student's T-test Test statistic 4N_1N
-Log Student's T-test combined score
Student's T-test q-value
Protein IDs
Majority protein IDs
Protein names
Gene names
1N
2N
3N
4N
Student's T-test Significant 2N_1N
Student's T-test Significant 3N_1N
Student's T-test Significant 4N_1N
Student's T-test significant
GOBP name
GOCC name
Peptides
Razor + unique peptides
Unique peptides
Sequence coverage [%]
Unique + razor sequence coverage [%]
Unique sequence coverage [%]
Mol. weight [kDa]
Q-value
Score
Intensity
Intensity L
Intensity H
-Log Student's T-test p-value 2N_1N
Student's T-test q-value 2N_1N
Student's T-test Difference 2N_1N
Student's T-test Test statistic 2N_1N
-Log Student's T-test p-value 3N_1N
Student's T-test q-value 3N_1N
Student's T-test Difference 3N_1N
Student's T-test Test statistic 3N_1N
-Log Student's T-test p-value 4N_1N
Student's T-test q-value 4N_1N
Student's T-test Difference 4N_1N
Student's T-test Test statistic 4N_1N
-Log Student's T-test combined score
Student's T-test q-value
Protein IDs
Majority protein IDs
Protein names
Gene names
1N
2N
3N
4N
Student's T-test Significant 2N_1N
Student's T-test Significant 3N_1N
Student's T-test Significant 4N_1N
Student's T-test significant
GOBP name
GOCC name
Peptides
Razor + unique peptides
Unique peptides
Sequence coverage [%]
Unique + razor sequence coverage [%]
Unique sequence coverage [%]
Mol. weight [kDa]
Q-value
Score
Intensity
Intensity L
Intensity H
-Log Student's T-test p-value 2N_1N
Student's T-test q-value 2N_1N
Student's T-test Difference 2N_1N
Student's T-test Test statistic 2N_1N
-Log Student's T-test p-value 3N_1N
Student's T-test q-value 3N_1N
Student's T-test Difference 3N_1N
Student's T-test Test statistic 3N_1N
-Log Student's T-test p-value 4N_1N
Student's T-test q-value 4N_1N
Student's T-test Difference 4N_1N
Student's T-test Test statistic 4N_1N
-Log Student's T-test combined score
Student's T-test q-value
Protein IDs
Majority protein IDs
Protein names
Gene names
1N
2N
3N
4N
Student's T-test Significant 2N_1N
Student's T-test Significant 3N_1N
Student's T-test Significant 4N_1N
Student's T-test significant
GOBP name
GOCC name
Peptides
Razor + unique peptides
Unique peptides
Sequence coverage [%]
Unique + razor sequence coverage [%]
Unique sequence coverage [%]
Mol. weight [kDa]
Q-value
Score
Intensity
Intensity L
Intensity H
-Log Student's T-test p-value 2N_1N
Student's T-test q-value 2N_1N
Student's T-test Difference 2N_1N
Student's T-test Test statistic 2N_1N
-Log Student's T-test p-value 3N_1N
Student's T-test q-value 3N_1N
Student's T-test Difference 3N_1N
Student's T-test Test statistic 3N_1N
-Log Student's T-test p-value 4N_1N
Student's T-test q-value 4N_1N
Student's T-test Difference 4N_1N
Student's T-test Test statistic 4N_1N
-Log Student's T-test combined score
Student's T-test q-value
Protein IDs
Majority protein IDs
Protein names
Gene names
1N
2N
3N
4N
Student's T-test Significant 2N_1N
Student's T-test Significant 3N_1N
Student's T-test Significant 4N_1N
Student's T-test significant
GOBP name
GOCC name
Peptides
Razor + unique peptides
Unique peptides
Sequence coverage [%]
Unique + razor sequence coverage [%]
Unique sequence coverage [%]
Mol. weight [kDa]
Q-value
Score
Intensity
Intensity L
Intensity H
-Log Student's T-test p-value 2N_1N
Student's T-test q-value 2N_1N
Student's T-test Difference 2N_1N
Student's T-test Test statistic 2N_1N
-Log Student's T-test p-value 3N_1N
Student's T-test q-value 3N_1N
Student's T-test Difference 3N_1N
Student's T-test Test statistic 3N_1N
-Log Student's T-test p-value 4N_1N
Student's T-test q-value 4N_1N
Student's T-test Difference 4N_1N
Student's T-test Test statistic 4N_1N
-Log Student's T-test combined score
Student's T-test q-value
Protein IDs
Majority protein IDs
Protein names
Gene names
1N
2N
3N
4N
Student's T-test Significant 2N_1N
Student's T-test Significant 3N_1N
Student's T-test Significant 4N_1N
Student's T-test significant
GOBP name
GOCC name
Peptides
Razor + unique peptides
Unique peptides
Sequence coverage [%]
Unique + razor sequence coverage [%]
Unique sequence coverage [%]
Mol. weight [kDa]
Q-value
Score
Intensity
Intensity L
Intensity H
-Log Student's T-test p-value 2N_1N
Student's T-test q-value 2N_1N
Student's T-test Difference 2N_1N
Student's T-test Test statistic 2N_1N
-Log Student's T-test p-value 3N_1N
Student's T-test q-value 3N_1N
Student's T-test Difference 3N_1N
Student's T-test Test statistic 3N_1N
-Log Student's T-test p-value 4N_1N
Student's T-test q-value 4N_1N
Student's T-test Difference 4N_1N
Student's T-test Test statistic 4N_1N
-Log Student's T-test combined score
Student's T-test q-value
Protein IDs
Majority protein IDs
Protein names
Gene names
1N
2N
3N
4N
Student's T-test Significant 2N_1N
Student's T-test Significant 3N_1N
Student's T-test Significant 4N_1N
Student's T-test significant
GOBP name
GOCC name
Peptides
Razor + unique peptides
Unique peptides
Sequence coverage [%]
Unique + razor sequence coverage [%]
Unique sequence coverage [%]
Mol. weight [kDa]
Q-value
Score
Intensity
Intensity L
Intensity H
-Log Student's T-test p-value 2N_1N
Student's T-test q-value 2N_1N
Student's T-test Difference 2N_1N
Student's T-test Test statistic 2N_1N
-Log Student's T-test p-value 3N_1N
Student's T-test q-value 3N_1N
Student's T-test Difference 3N_1N
Student's T-test Test statistic 3N_1N
-Log Student's T-test p-value 4N_1N
Student's T-test q-value 4N_1N
Student's T-test Difference 4N_1N
Student's T-test Test statistic 4N_1N
-Log Student's T-test combined score
Student's T-test q-value
Protein IDs
Majority protein IDs
Protein names
Gene names
1N
2N
3N
4N
Student's T-test Significant 2N_1N
Student's T-test Significant 3N_1N
Student's T-test Significant 4N_1N
Student's T-test significant
GOBP name
GOCC name
Peptides
Razor + unique peptides
Unique peptides
Sequence coverage [%]
Unique + razor sequence coverage [%]
Unique sequence coverage [%]
Mol. weight [kDa]
Q-value
Score
Intensity
Intensity L
Intensity H
-Log Student's T-test p-value 2N_1N
Student's T-test q-value 2N_1N
Student's T-test Difference 2N_1N
Student's T-test Test statistic 2N_1N
-Log Student's T-test p-value 3N_1N
Student's T-test q-value 3N_1N
Student's T-test Difference 3N_1N
Student's T-test Test statistic 3N_1N
-Log Student's T-test p-value 4N_1N
Student's T-test q-value 4N_1N
Student's T-test Difference 4N_1N
Student's T-test Test statistic 4N_1N
-Log Student's T-test combined score
Student's T-test q-value
Protein IDs
Majority protein IDs
Protein names
Gene names
1N
2N
3N
4N
Student's T-test Significant 2N_1N
Student's T-test Significant 3N_1N
Student's T-test Significant 4N_1N
[truncated: 553 more rows]

## Sheet: Supplementary_Table_Proteome
Gene names	ENSG	1N	2N	3N	4N	Student's T-test significant	GOBP name	GOCC name	Intensity	Intensity L	Intensity H	-Log Student's T-test p-value 2N_1N	Student's T-test q-value 2N_1N	Student's T-test Difference 2N_1N	Student's T-test Test statistic 2N_1N	-Log Student's T-test p-value 3N_1N	Student's T-test q-value 3N_1N	Student's T-test Difference 3N_1N	Student's T-test Test statistic 3N_1N	-Log Student's T-test p-value 4N_1N	Student's T-test q-value 4N_1N	Student's T-test Difference 4N_1N	Student's T-test Test statistic 4N_1N	-Log Student's T-test combined score	Student's T-test q-value	Protein IDs	Majority protein IDs	Protein names	Chromosome	Gene start (bp)	Gene end (bp)
YPR010C-A	YPR010C-A	1.55407	0.205224	-0.149684	-0.346318	2N_1N;3N_1N;4N_1N		cell part;integral to membrane;intrinsic to membrane;membrane part	8542700000	4687400000	3855400000	3.88883	0	-1.05976	-14.5668	4.20967	0	-1.32129	-17.564	4.47297	0	-1.45002	-20.4673	12.5715	0.182222	A5Z2X5	A5Z2X5	UPF0495 protein YPR010C-A	XVI	582373	582734
STE2	YFL026W	0.339733	0.232739	0.148435	0.0343521	2N_1N;3N_1N;4N_1N	biological regulation;cell projection assembly;cell projection organization;cell surface receptor linked signaling pathway;cellular component assembly;cellular component assembly at cellular level;cellular component organization;cellular component organization at cellular level;cellular component organization or biogenesis;cellular component organization or biogenesis at cellular level;cellular p…	cell part;integral to membrane;integral to plasma membrane;intrinsic to membrane;intrinsic to plasma membrane;membrane part;plasma membrane part	7612900000	4323300000	3289600000	1.13417	0.0424037	0.424367	2.41166	1.10047	0.0256897	0.394587	2.34037	0.935581	0.0366175	0.261024	2.00096	3.17022	0.0945064	D6VTK4	D6VTK4	Pheromone alpha factor receptor	VI	82580	83875
CET1	YPL228W	0.426546	-0.0799054	-0.0462063	-0.0210864	4N_1N	biological regulation;cellular macromolecule metabolic process;cellular metabolic process;cellular nitrogen compound metabolic process;cellular process;macromolecule metabolic process;metabolic process;mRNA capping;mRNA metabolic process;mRNA processing;nitrogen compound metabolic process;nucleic acid metabolic process;nucleobase-containing compound metabolic process;positive regulation of biolog…	cell part;intracellular organelle part;intracellular part;macromolecular complex;methyltransferase complex;mRNA cap methyltransferase complex;nuclear part;organelle part;protein complex	17086000000	9427100000	7658500000	1.01102	0.0565427	-0.219826	-2.15445	0.687545	0.098606	-0.101059	-1.51093	0.988207	0.0314378	0.0765741	2.10774	2.68678	0.132034	O13297	O13297	mRNA-capping enzyme subunit beta	XVI	118382	120031
FOB1	YDR110W	NaN	NaN	0.405623	0.402785		aging;biological regulation;biosynthetic process;cell aging;cell cycle process;cellular biosynthetic process;cellular component organization;cellular component organization at cellular level;cellular component organization or biogenesis;cellular component organization or biogenesis at cellular level;cellular localization;cellular macromolecule biosynthetic process;cellular macromolecule localizat…	cell part;chromatin;chromosomal part;heterochromatin;intracellular non-membrane-bounded organelle;intracellular organelle;intracellular organelle part;intracellular part;non-membrane-bounded organelle;nuclear part;nucleolus;organelle;organelle part;rDNA heterochromatin	705340000	495940000	209400000	NaN	1	0	NaN	0	0.949305	NaN	0	0	1	NaN	0	NaN	0.361818	O13329	O13329	DNA replication fork-blocking protein FOB1	IV	676102	677802
RPS9A	YPL081W	1.1861	0.131723	0.203475	-0.232808	2N_1N;3N_1N;4N_1N	biosynthetic process;cellular biosynthetic process;cellular macromolecule biosynthetic process;cellular macromolecule metabolic process;cellular metabolic process;cellular nitrogen compound metabolic process;cellular process;cellular protein metabolic process;cytoplasmic translation;macromolecule biosynthetic process;macromolecule metabolic process;maturation of SSU-rRNA;maturation of SSU-rRNA fr…	cell part;cytosolic small ribosomal subunit;intracellular non-membrane-bounded organelle;intracellular organelle;intracellular organelle part;intracellular part;macromolecular complex;non-membrane-bounded organelle;nuclear part;nucleolus;organelle;organelle part;preribosome;ribonucleoprotein complex;small ribosomal subunit;small-subunit processome	504060000000	284830000000	219230000000	3.47682	0.000649215	-0.678814	-11.4364	3.03295	0.000954545	-0.554485	-8.78246	3.42097	0.000163823	-0.848793	-11.0652	9.93074	0.0880661	O13516	O13516	40S ribosomal protein S9-A	XVI	404950	406044
COQ4	YDR204W	-0.353936	-0.427509	-0.190261	-0.0623845	4N_1N	biosynthetic process;cellular biosynthetic process;cellular ketone metabolic process;cellular metabolic process;cellular process;coenzyme biosynthetic process;coenzyme metabolic process;cofactor biosynthetic process;cofactor metabolic process;metabolic process;oxidoreduction coenzyme metabolic process;quinone cofactor biosynthetic process;quinone cofactor metabolic process;small molecule metaboli…	cell part;cytoplasmic part;extrinsic to membrane;extrinsic to mitochondrial inner membrane;extrinsic to organelle membrane;intracellular organelle part;intracellular part;membrane;membrane part;mitochondrial inner membrane;mitochondrial membrane;mitochondrial membrane part;mitochondrial part;organelle inner membrane;organelle membrane;organelle part	4850700000	2403900000	2446800000	0.196057	0.736741	0.214648	0.5103	0.836904	0.0574247	0.618222	1.80389	1.20651	0.01814	0.87691	2.56729	2.23947	0.185895	O13525	O13525	Ubiquinone biosynthesis protein COQ4. mitochondrial	IV	858137	859144
THP2	YHR167W	-0.0593201	-0.0645487	-0.230897	0.0524437	4N_1N	anatomical structure homeostasis;biological regulation;biosynthetic process;cellular biosynthetic process;cellular component organization;cellular component organization at cellular level;cellular component organization or biogenesis;cellular component organization or biogenesis at cellular level;cellular macromolecule metabolic process;cellular metabolic process;cellular nitrogen compound metabo…	cell part;intracellular organelle part;intracellular part;macromolecular complex;nuclear part;nucleoplasm part;nucleoplasmic THO complex;organelle part;protein complex;THO complex;THO complex part of transcription export complex;transcription elongation factor complex	17234000000	8135400000	9098700000	0.423228	0.361513	0.250512	0.991943	0.0673347	0.944231	0.0523213	0.192979	0.894516	0.0411994	0.494327	1.91849	1.38508	0.400555	O13539	O13539	THO complex subunit THP2	VIII	439342	440127
CCW14	YLR390W-A	-1.30543	-0.135093	-0.846831	-0.211128		cell wall organization;cell wall organization or biogenesis;cellular cell wall organization;cellular cell wall organization or biogenesis;cellular component organization;cellular component organization or biogenesis;cellular component organization or biogenesis at cellular level;cellular process;external encapsulating structure organization;fungal-type cell wall organization;fungal-type cell wall…	anchored to membrane;cell part;cell wall;external encapsulating structure;extracellular region;fungal-type cell wall;intrinsic to membrane;membrane part	2495700000	1128600000	1367100000	0	0.958663	1.43964	0	0	0.949985	0.850631	0	0	1	1.5887	0	0	1	O13547	O13547	Covalently-linked cell wall protein 14	XII	903724	904440
RPN13	YLR421C	1.28386	0.201282	-0.227739	-0.404603	2N_1N;3N_1N;4N_1N	catabolic process;cellular catabolic process;cellular macromolecule catabolic process;cellular macromolecule metabolic process;cellular metabolic process;cellular process;macromolecule catabolic process;macromolecule metabolic process;metabolic process;modification-dependent macromolecule catabolic process;modification-dependent protein catabolic process;primary metabolic process;protein metaboli…	cell part;cytoplasmic part;cytosolic part;cytosolic proteasome complex;intracellular membrane-bounded organelle;intracellular organelle;intracellular part;macromolecular complex;membrane-bounded organelle;nucleus;organelle;proteasome complex;proteasome regulatory particle. lid subcomplex;proteasome storage granule;protein complex	6517900000	3312000000	3206000000	2.0956	0.00592677	-0.747059	-11.0961	2.40616	0.00242017	-1.08113	-8.10546	1.62273	0.00617058	-1.43695	-4.25221	6.12448	0.044146	O13563	O13563	26S proteasome regulatory subunit RPN13	XII	965090	965560
	YPR089W	-0.52613	0.297485	-0.0664416	NaN	2N_1N;3N_1N		cell part;cytoplasmic part;Golgi apparatus;intracellular membrane-bounded organelle;intracellular organelle;intracellular part;membrane-bounded organelle;organelle	2470500000	1204900000	1265600000	2.66622	0.00233656	1.09218	7.03053	1.51148	0.0092816	0.765647	3.85685	0	1	NaN	0	4.17769	0.0545838	O13585	O13585	Dilute domain-containing protein YPR089W	XVI	713275	715941
RPL36B	YPL249C-A	1.22426	0.364751	0.0409495	-0.211831	2N_1N;3N_1N;4N_1N	biosynthetic process;cellular biosynthetic process;cellular macromolecule biosynthetic process;cellular macromolecule metabolic process;cellular metabolic process;cellular process;cellular protein metabolic process;cytoplasmic translation;macromolecule biosynthetic process;macromolecule metabolic process;metabolic process;primary metabolic process;protein metabolic process;translation	cell part;cytosolic large ribosomal subunit;intracellular organelle part;intracellular part;large ribosomal subunit;macromolecular complex;organelle part;ribonucleoprotein complex	343320000000	196660000000	146660000000	2.97263	0.0018103	-0.52322	-8.46967	3.65281	0	-0.795809	-12.6851	3.76841	0	-0.932758	-13.5754	10.3939	0.0977587	O14455	O14455	60S ribosomal protein L36-B	XVI	75699	76239
MBF1	YOR298C-A	1.04688	0.30658	-0.125131	-0.37191	2N_1N;3N_1N;4N_1N	biological regulation;biosynthetic process;cellular biosynthetic process;cellular macromolecule biosynthetic process;cellular macromolecule metabolic process;cellular metabolic process;cellular nitrogen compound metabolic process;cellular process;macromolecule biosynthetic process;macromolecule metabolic process;metabolic process;nitrogen compound metabolic process;nucleic acid metabolic process;…	cell part;cytoplasm;intracellular membrane-bounded organelle;intracellular organelle;intracellular part;membrane-bounded organelle;nucleus;organelle	280080000000	156600000000	123490000000	1.19008	0.0360588	-0.420519	-2.53162	2.0991	0.00329968	-0.808248	-4.91467	2.37326	0.000366438	-0.964148	-5.85958	5.66245	0.0435847	O14467	O14467	Multiprotein-bridging factor 1	XV	877230	877685
YOR304C-A	YOR304C-A	0.910022	0.624905	0.12652	-0.11055	3N_1N;4N_1N	actin cytoskeleton organization;actin filament bundle assembly;actin filament organization;actin filament-based process;cellular component assembly;cellular component assembly at cellular level;cellular component organization;cellular component organization at cellular level;cellular component organization or biogenesis;cellular component organization or biogenesis at cellular level;cellular proc…	cell part;cellular bud neck;cellular bud tip;cytoplasm;intracellular part;site of polarized growth	4747100000	2843600000	1903500000	0.246969	0.648264	0.031324	0.642495	1.15765	0.0223718	-0.385268	-3.59086	2.68559	0.000306122	-0.521826	-10.1077	4.0902	0.0562748	O14468	O14468	Uncharacterized protein YOR304C-A	XV	888520	888750
YBR085C-A	YBR085C-A	1.64328	1.30138	-0.0757749	0.326765	3N_1N;4N_1N		cell part;cytoplasm;intracellular membrane-bounded organelle;intracellular organelle;intracellular part;membrane-bounded organelle;nucleus;organelle	33110000000	20919000000	12191000000	0.38212	0.418096	-0.293694	-0.908845	1.97824	0.00388367	-1.45474	-4.5379	1.62578	0.00618971	-1.04691	-3.55599	3.98614	0.0587445	O43137	O43137	Uncharacterized protein YBR085C-A	II	418907	419164
MDM35	YKL053C-A	0.629329	0.36065	-0.0185222	-0.476615	4N_1N	cellular component assembly;cellular component assembly at cellular level;cellular component organization;cellular component organization at cellular level;cellular component organization or biogenesis;cellular component organization or biogenesis at cellular level;cellular macromolecular complex assembly;cellular macromolecular complex subunit organization;cellular process;cellular protein compl…	cell part;cytoplasmic part;intracellular membrane-bounded organelle;intracellular organelle;intracellular organelle part;intracellular part;membrane-bounded organelle;membrane-enclosed lumen;mitochondrial intermembrane space;mitochondrial part;nucleus;organelle;organelle envelope lumen;organelle part	4671400000	2564000000	2107400000	0.0505667	0.946981	-0.0480392	-0.147209	0.498758	0.200776	-0.486168	-1.19741	1.31643	0.0134612	-0.832256	-2.8112	1.86576	0.257441	O60200	O60200	Mitochondrial distribution and morphology protein 35	XI	339182	339442
TIM9	YEL020W-A	1.03837	0.176974	-0.299426	-0.0357563	2N_1N;3N_1N;4N_1N	cellular component organization;cellular component organization at cellular level;cellular component organization or biogenesis;cellular component organization or biogenesis at cellular level;cellular membrane organization;cellular process;establishment of localization;establishment of localization in cell;establishment of protein localization;establishment of protein localization in mitochondrio…	cell part;cytoplasmic part;intracellular organelle part;intracellular part;macromolecular complex;membrane part;membrane-enclosed lumen;mitochondrial inner membrane protein insertion complex;mitochondrial intermembrane space;mitochondrial intermembrane space protein transporter complex;mitochondrial membrane part;mitochondrial part;organelle envelope lumen;organelle part;protein complex	6969800000	3857600000	3112300000	1.30909	0.0266742	-0.525877	-4.34596	1.6632	0.00678899	-0.93956	-6.67478	2.12361	0.00124411	-0.590596	-6.46069	5.0959	0.0448997	O74700	O74700	Mitochondrial import inner membrane translocase subunit TIM9	V	117211	117474
SEM1	YDR363W-A	1.04643	0.204347	-0.315512	-0.209805	2N_1N;3N_1N;4N_1N	biological regulation;biosynthetic process;catabolic process;cellular biosynthetic process;cellular catabolic process;cellular component assembly;cellular component assembly at cellular level;cellular component organization;cellular component organization at cellular level;cellular component organization or biogenesis;cellular component organization or biogenesis at cellular level;cellular macrom…	cell part;cytoplasmic part;cytosol;cytosolic part;cytosolic proteasome complex;intracellular membrane-bounded organelle;intracellular organelle;intracellular part;macromolecular complex;membrane-bounded organelle;nucleus;organelle;proteasome complex;proteasome regulatory particle. lid subcomplex;proteasome storage granule;protein complex	33826000000	18106000000	15720000000	3.96846	0	-0.541359	-15.2605	3.94918	0	-1.04118	-15.0897	3.89144	0	-0.814473	-14.5891	11.8091	0.146951	O94742	O94742	26S proteasome complex subunit SEM1	IV	1202128	1202397
CYC1	YJR048W	0.331201	0.341663	-0.24369	-0.620338	2N_1N;3N_1N;4N_1N	cellular metabolic process;cellular process;electron transport chain;generation of precursor metabolites and energy;metabolic process;mitochondrial electron transport. cytochrome c to oxygen;mitochondrial electron transport. ubiquinol to cytochrome c;oxidation-reduction process;respiratory electron transport chain	cell part;cytoplasmic part;intracellular organelle part;intracellular part;membrane part;membrane-enclosed lumen;mitochondrial intermembrane space;mitochondrial part;organelle envelope lumen;organelle part;respiratory chain	3603600000	1890000000	1713600000	1.10488	0.0450013	0.257134	2.34966	1.1875	0.0205305	-0.23483	-2.52603	2.53516	0.00039851	-0.504019	-6.48413	4.82754	0.0463232	P00044	P00044	Cytochrome c iso-1	X	526335	526664
CYC7	YEL039C	0.618891	NaN	-0.287143	-0.580078	3N_1N;4N_1N	cellular metabolic process;cellular process;electron transport chain;generation of precursor metabolites and energy;metabolic process;mitochondrial electron transport. cytochrome c to oxygen;mitochondrial electron transport. ubiquinol to cytochrome c;oxidation-reduction process;respiratory electron transport chain	cell part;cytoplasmic part;intracellular organelle part;intracellular part;membrane part;membrane-enclosed lumen;mitochondrial intermembrane space;mitochondrial part;organelle envelope lumen;organelle part;respiratory chain	3625000000	2023300000	1601800000	0	0.958994	NaN	0	1.1834	0.0208182	-0.504011	-2.51717	1.35826	0.0119501	-0.799258	-3.35711	2.54166	0.14611	P00045	P00045	Cytochrome c iso-2	V	79636	79977
QCR6	YFR033C	1.11776	0.192658	-0.257173	0.140368	2N_1N;3N_1N;4N_1N	aerobic respiration;cellular metabolic process;cellular process;cellular respiration;electron transport chain;energy derivation by oxidation of organic compounds;generation of precursor metabolites and energy;metabolic process;mitochondrial electron transport. ubiquinol to cytochrome c;oxidation-reduction process;respiratory electron transport chain	cell part;cytoplasmic part;intracellular organelle part;intracellular part;macromolecular complex;membrane part;membrane-enclosed lumen;mitochondrial intermembrane space;mitochondrial membrane part;mitochondrial part;mitochondrial respiratory chain complex III;organelle envelope lumen;organelle part;protein complex;respiratory chain complex III	31402000000	17769000000	13632000000	3.8745	0	-0.591409	-14.4453	3.71965	0	-1.03853	-13.1928	3.33686	0.000150706	-0.450144	-10.5276	10.931	0.115516	P00127	P00127	Cytochrome b-c1 complex subunit 6	VI	224326	224769
QCR7	YDR529C	0.465084	-0.410624	-0.85557	-0.51916	2N_1N;3N_1N;4N_1N	aerobic respiration;cellular component assembly;cellular component assembly at cellular level;cellular component biogenesis;cellular component organization;cellular component organization at cellular level;cellular component organization or biogenesis;cellular component organization or biogenesis at cellular level;cellular macromolecular complex assembly;cellular macromolecular complex subunit or…	cell part;cytoplasmic part;intracellular organelle part;intracellular part;macromolecular complex;membrane part;mitochondrial membrane part;mitochondrial part;mitochondrial respiratory chain complex III;organelle part;protein complex;respiratory chain complex III	92279000000	44908000000	47371000000	2.20419	0.00476359	-0.619855	-5.26128	2.93734	0.000880734	-0.969218	-8.29138	2.15244	0.000845027	-0.593186	-5.08832	7.29397	0.0499652	P00128	P00128	Cytochrome b-c1 complex subunit 7	IV	1496165	1496548
ADH1	YOL086C	-0.473459	-0.109163	0.618197	0.481945	2N_1N;3N_1N;4N_1N	alcohol biosynthetic process;alcohol metabolic process;amine catabolic process;amine metabolic process;amino acid catabolic process to alcohol via Ehrlich pathway;amino acid catabolic process via Ehrlich pathway;biosynthetic process;carboxylic acid catabolic process;carboxylic acid metabolic process;catabolic process;cellular amine metabolic process;cellular amino acid catabolic process;cellular …	cell part;cytoplasm;intracellular part	1417500000000	827270000000	590200000000	2.57102	0.00273084	0.639659	6.62984	3.87598	0	1.40761	14.4577	3.92821	0	1.42845	14.906	10.3752	0.0973686	P00330	P00330	Alcohol dehydrogenase 1	XV	159548	160594
TDH2	YJR009C	0.21907	0.00368959	0.0622621	-0.692841	3N_1N;4N_1N	alcohol biosynthetic process;alcohol catabolic process;alcohol metabolic process;apoptosis;biosynthetic process;carbohydrate biosynthetic process;carbohydrate catabolic process;carbohydrate metabolic process;catabolic process;cell death;cellular biosynthetic process;cellular carbohydrate biosynthetic process;cellular carbohydrate catabolic process;cellular carbohydrate metabolic process;cellular …	cell part;cell wall;cytoplasm;cytoplasmic part;external encapsulating structure;fungal-type cell wall;intracellular membrane-bounded organelle;intracellular organelle;intracellular part;lipid particle;membrane-bounded organelle;mitochondrion;organelle	136110000000	68790000000	67317000000	0.459528	0.319695	0.0883644	1.06445	1.45064	0.010661	0.225126	3.12286	2.15827	0.000848297	-0.384344	-5.10755	4.06844	0.0566746	P00358	P00358	Glyceraldehyde-3-phosphate dehydrogenase 2	X	453683	454681
TDH3	YGR192C	-0.233111	0.0232985	-0.131903	-0.158867	2N_1N;3N_1N;4N_1N	alcohol biosynthetic process;alcohol catabolic process;alcohol metabolic process;apoptosis;biosynthetic process;carbohydrate biosynthetic process;carbohydrate catabolic process;carbohydrate metabolic process;catabolic process;cell death;cellular biosynthetic process;cellular carbohydrate biosynthetic process;cellular carbohydrate catabolic process;cellular carbohydrate metabolic process;cellular …	cell part;cell wall;cytoplasm;cytoplasmic part;external encapsulating structure;fungal-type cell wall;intracellular membrane-bounded organelle;intracellular organelle;intracellular part;lipid particle;membrane-bounded organelle;mitochondrion;organelle	7892100000000	4013400000000	3878700000000	4.69683	0	0.575235	23.3032	3.90653	0	0.486909	14.7183	4.1321	0	0.535989	16.7885	12.7355	0.190192	P00359	P00359	Glyceraldehyde-3-phosphate dehydrogenase 3	VII	882812	883810
TDH1	YJL052W	-0.74879	-1.45688	-1.69247	-2.5857	2N_1N;3N_1N;4N_1N	alcohol biosynthetic process;alcohol catabolic process;alcohol metabolic process;biosynthetic process;carbohydrate biosynthetic process;carbohydrate catabolic process;carbohydrate metabolic process;catabolic process;cellular biosynthetic process;cellular carbohydrate biosynthetic process;cellular carbohydrate catabolic process;cellular carbohydrate metabolic process;cellular metabolic process;cel…	cell part;cell wall;cytoplasm;cytoplasmic part;external encapsulating structure;fungal-type cell wall;intracellular membrane-bounded organelle;intracellular organelle;intracellular part;lipid particle;membrane-bounded organelle;mitochondrion;organelle	993100000000	317750000000	675350000000	1.46042	0.0183344	-0.317711	-3.14621	1.8971	0.00437698	-0.548559	-4.29721	3.41245	0.000162162	-1.30023	-11.0096	6.76997	0.0465508	P00360	P00360	Glyceraldehyde-3-phosphate dehydrogenase 1	X	338271	339269
COX1	Q0045	-0.325911	NaN	-1.08459	-0.740859		aerobic respiration;cellular metabolic process;cellular process;cellular respiration;electron transport chain;energy derivation by oxidation of organic compounds;generation of precursor metabolites and energy;metabolic process;mitochondrial electron transport. cytochrome c to oxygen;oxidation-reduction process;respiratory electron transport chain	cell part;cytoplasmic part;integral to membrane;intracellular organelle part;intracellular part;intrinsic to membrane;macromolecular complex;membrane part;mitochondrial membrane part;mitochondrial part;mitochondrial respiratory chain complex IV;organelle part;protein complex;respiratory chain complex IV	9423900000	4950000000	4473800000	0	0.958318	NaN	0	0	0.949637	-0.360448	0	0	1	0.0794454	0	0	1	P00401	P00401	Cytochrome c oxidase subunit 1	Mito	13818	26701
COX5A	YNL052W	0.834527	-0.514892	-0.464526	-0.0664486	2N_1N;3N_1N;4N_1N	cellular metabolic process;cellular process;electron transport chain;generation of precursor metabolites and energy;metabolic process;mitochondrial electron transport. cytochrome c to oxygen;oxidation-reduction process;respiratory electron transport chain	cell part;cytoplasmic part;intracellular organelle part;intracellular part;macromolecular complex;membrane;membrane part;membrane-enclosed lumen;mitochondrial inner membrane;mitochondrial intermembrane space;mitochondrial membrane;mitochondrial membrane part;mitochondrial part;mitochondrial respiratory chain complex IV;organelle envelope lumen;organelle inner membrane;organelle membrane;organelle…	10845000000	5426500000	5418800000	3.25804	0.000957529	-1.02582	-10.0464	4.2496	0	-0.909532	-17.9768	2.22511	0.000524642	-0.365625	-5.33254	9.73276	0.0831157	P00424	P00424	Cytochrome c oxidase polypeptide 5A. mitochondrial	XIV	531725	532186
COX5B	YIL111W	0.582656	-0.120195	-0.265523	-0.628986	2N_1N;3N_1N;4N_1N	cellular metabolic process;cellular process;electron transport chain;generation of precursor metabolites and energy;metabolic process;mitochondrial electron transport. cytochrome c to oxygen;oxidation-reduction process;respiratory electron transport chain	cell part;cytoplasmic part;intracellular organelle part;intracellular part;macromolecular complex;membrane part;mitochondrial membrane part;mitochondrial part;mitochondrial respiratory chain complex IV;organelle part;protein complex;respiratory chain complex IV	18466000000	9864000000	8602300000	1.37295	0.0223324	-0.31236	-2.94048	1.06181	0.0295846	-0.329967	-2.25944	2.44019	0.000380783	-0.685027	-6.11133	4.87496	0.0460764	P00425	P00425	Cytochrome c oxidase polypeptide 5B. mitochondrial	IX	155311	155765
COX6	YHR051W	0.842898	-0.00823627	-0.416442	-0.182819	2N_1N;3N_1N;4N_1N	cellular metabolic process;cellular process;electron transport chain;generation of precursor metabolites and energy;metabolic process;mitochondrial electron transport. cytochrome c to oxygen;oxidation-reduction process;respiratory electron transport chain	cell part;cytoplasmic part;intracellular organelle part;intracellular part;macromolecular complex;membrane part;mitochondrial membrane part;mitochondrial part;mitochondrial respiratory chain complex IV;organelle part;protein complex;respiratory chain complex IV	64924000000	35572000000	29353000000	3.45413	0.000623116	-0.488982	-11.2842	3.6971	0	-0.850521	-13.0194	3.507	0.000175503	-0.494756	-11.6418	10.6582	0.104684	P00427	P00427	Cytochrome c oxidase subunit 6. mitochondrial	VIII	209705	210151
CCP1	YKR066C	0.128498	0.134746	0.075578	-0.107017	2N_1N;3N_1N;4N_1N	catabolic process;cellular catabolic process;cellular metabolic process;cellular process;cellular response to chemical stimulus;cellular response to hydrogen peroxide;cellular response to oxidative stress;cellular response to reactive oxygen species;cellular response to stimulus;cellular response to stress;hydrogen peroxide catabolic process;hydrogen peroxide metabolic process;metabolic process;r…	cell part;cytoplasmic part;intracellular organelle lumen;intracellular organelle part;intracellular part;membrane-enclosed lumen;mitochondrial intermembrane space;mitochondrial matrix;mitochondrial part;organelle envelope lumen;organelle lumen;organelle part	61424000000	33592000000	27832000000	1.80976	0.0100992	0.299626	4.04835	1.92254	0.00420655	0.322388	4.37167	1.44512	0.00988399	0.242574	3.1097	5.17742	0.0443648	P00431	P00431	Cytochrome c peroxidase. mitochondrial	XI	566113	567198
SOD1	YJR104C	1.11483	0.443048	-0.170785	-0.606833	2N_1N;3N_1N;4N_1N	age-dependent response to oxidative stress;age-dependent response to oxidative stress involved in chronological cell aging;age-dependent response to reactive oxygen species;age-dependent response to reactive oxygen species involved in chronological cell aging;biological regulation;cation homeostasis;cell wall organization;cell wall organization or biogenesis;cellular age-dependent response to rea…	cell part;cytoplasmic part;cytosol;intracellular membrane-bounded organelle;intracellular organelle;intracellular organelle part;intracellular part;membrane-bounded organelle;membrane-enclosed lumen;mitochondrial intermembrane space;mitochondrial part;nucleus;organelle;organelle envelope lumen;organelle part	599830000000	332120000000	267710000000	2.17313	0.00518317	-0.375323	-5.15691	3.75571	0	-0.937273	-13.4748	4.28683	0	-1.28282	-18.3702	10.2157	0.0946166	P00445	P00445	Superoxide dismutase [Cu-Zn]	X	622550	623014
SOD2	YHR008C	0.0464972	-0.463176	-0.35849	-0.333001	2N_1N	age-dependent response to oxidative stress;age-dependent response to oxidative stress involved in chronological cell aging;age-dependent response to reactive oxygen species;age-dependent response to reactive oxygen species involved in chronological cell aging;aging;cell aging;cellular age-dependent response to reactive oxygen species;cellular metabolic process;cellular process;cellular response t…	cell part;cytoplasmic part;intracellular membrane-bounded organelle;intracellular organelle;intracellular organelle lumen;intracellular organelle part;intracellular part;membrane-bounded organelle;membrane-enclosed lumen;mitochondrial matrix;mitochondrial part;mitochondrion;organelle;organelle lumen;organelle part	76713000000	35052000000	41662000000	1.15653	0.0398203	-0.178937	-2.45938	0.484344	0.213281	-0.0638725	-1.11365	0.502521	0.181248	0.0653019	1.14952	2.14339	0.201729	P00447	P00447	Superoxide dismutase [Mn]. mitochondrial	VIII	122889	123590
HIS1	YER055C	-1.04583	-0.617358	0.129206	0.0565375	2N_1N;3N_1N;4N_1N	amine biosynthetic process;amine metabolic process;biosynthetic process;carboxylic acid biosynthetic process;carboxylic acid metabolic process;cellular amine metabolic process;cellular amino acid biosynthetic process;cellular amino acid metabolic process;cellular biosynthetic process;cellular ketone metabolic process;cellular metabolic process;cellular nitrogen compound biosynthetic process;cellu…	cell part;cytoplasm;intracellular part	105600000000	56533000000	49065000000	2.35334	0.00349425	0.66817	5.78633	3.7017	0	1.47724	13.0546	3.60606	0	1.51809	12.3413	9.6611	0.0808121	P00498	P00498	ATP phosphoribosyltransferase	V	264892	265785
CDC28	YBR160W	-0.799935	-0.703144	-0.157572	0.0308746	2N_1N;3N_1N;4N_1N	biological regulation;catabolic process;cell cycle phase;cell cycle process;cell division;cellular catabolic process;cellular component assembly;cellular component assembly at cellular level;cellular component organization;cellular component organization at cellular level;cellular component organization or biogenesis;cellular component organization or biogenesis at cellular level;cellular macromo…	cell part;cellular bud neck;cyclin-dependent protein kinase holoenzyme complex;cytoplasm;cytoplasmic part;endoplasmic reticulum;intracellular membrane-bounded organelle;intracellular organelle;intracellular part;macromolecular complex;membrane-bounded organelle;nucleus;organelle;protein complex;site of polarized growth	20773000000	11762000000	9010100000	1.32909	0.024347	0.391383	2.83992	2.96125	0.000891247	1.06985	8.41177	3.39574	0.00015894	1.33437	10.9013	7.68608	0.0522565	P00546	P00546	Cyclin-dependent kinase 1	II	560078	560974
CDC19	YAL038W	-1.02487	-0.344657	0.196483	-0.222546	2N_1N;3N_1N;4N_1N	alcohol catabolic process;alcohol metabolic process;carbohydrate catabolic process;carbohydrate metabolic process;carboxylic acid metabolic process;catabolic process;cellular carbohydrate catabolic process;cellular carbohydrate metabolic process;cellular ketone metabolic process;cellular metabolic process;cellular process;generation of precursor metabolites and energy;glucose catabolic process;gl…	cell part;cytoplasm;intracellular part	1695200000000	864700000000	830540000000	3.67306	0.000905109	1.00003	12.8369	4.99245	0	1.58808	27.6507	4.55066	0	1.28156	21.4107	13.2162	0.218037	P00549	P00549	Pyruvate kinase 1	I	71786	73288
PGK1	YCR012W	-0.09043	0.0626491	-0.232764	-0.266701	2N_1N;3N_1N;4N_1N	alcohol biosynthetic process;alcohol catabolic process;alcohol metabolic process;biosynthetic process;carbohydrate biosynthetic process;carbohydrate catabolic process;carbohydrate metabolic process;catabolic process;cellular biosynthetic process;cellular carbohydrate biosynthetic process;cellular carbohydrate catabolic process;cellular carbohydrate metabolic process;cellular metabolic process;cel…	cell part;cytoplasmic part;intracellular membrane-bounded organelle;intracellular organelle;intracellular part;membrane-bounded organelle;mitochondrion;organelle	3640100000000	1855500000000	1784600000000	2.07045	0.00604672	0.588367	4.8233	1.39096	0.0119712	0.366525	2.98225	1.39534	0.011016	0.373384	2.99246	4.85675	0.0462211	P00560	P00560	Phosphoglycerate kinase	III	137746	138996
CDC8	YJR057W	0.000534698	0.267314	0.118585	0.023455		2'-deoxyribonucleotide biosynthetic process;2'-deoxyribonucleotide metabolic process;biosynthetic process;cellular biosynthetic process;cellular metabolic process;cellular nitrogen compound biosynthetic process;cellular nitrogen compound metabolic process;cellular process;deoxyribonucleoside diphosphate biosynthetic process;deoxyribonucleoside diphosphate metabolic process;deoxyribonucleoside tri…	cell part;cytoplasm;intracellular membrane-bounded organelle;intracellular organelle;intracellular part;membrane-bounded organelle;nucleus;organelle	1996000000	1056600000	939390000	0.870017	0.0839128	0.608894	2.03348	0.768856	0.073244	0.569004	1.79652	0.474464	0.206652	0.517314	1.25795	2.11334	0.207131	P00572	P00572	Thymidylate kinase	X	544062	544712
SUC2	YIL162W	NaN	NaN	0.237562	0.135692		carbohydrate catabolic process;carbohydrate metabolic process;catabolic process;cellular carbohydrate catabolic process;cellular carbohydrate metabolic process;cellular macromolecule metabolic process;cellular metabolic process;cellular polysaccharide catabolic process;cellular polysaccharide metabolic process;cellular process;disaccharide catabolic process;disaccharide metabolic process;fructan …	cell part;cytoplasm;extracellular region;intracellular part	912850000	607920000	304930000	NaN	1	0	NaN	0	0.949028	NaN	0	0	1	NaN	0	NaN	0.365379	P00724	P00724	Invertase 2	IX	37385	38983
PRC1	YMR297W	-1.24479	-1.41255	-0.835582	-0.518649	3N_1N;4N_1N	biosynthetic process;catabolic process;cellular biosynthetic process;cellular catabolic process;cellular macromolecule catabolic process;cellular macromolecule metabolic process;cellular metabolic process;cellular process;cellular protein catabolic process;cellular protein metabolic process;macromolecule catabolic process;macromolecule metabolic process;metabolic process;peptide biosynthetic proc…	cell part;cytoplasmic part;fungal-type vacuole;intracellular membrane-bounded organelle;intracellular organelle;intracellular part;lytic vacuole;membrane-bounded organelle;organelle;storage vacuole;vacuole	27304000000	11710000000	15594000000	0.149982	0.81315	0.0517939	0.402388	2.34705	0.0026487	0.693956	5.76337	3.11128	0.00012766	1.11151	9.20452	5.60831	0.0435743	P00729	P00729	Carboxypeptidase Y	XIII	861922	863520
CAR1	YPL111W	0.41846	0.0798875	0.360728	0.571137	3N_1N;4N_1N	amide biosynthetic process;amine catabolic process;amine metabolic process;arginine catabolic process;arginine catabolic process to ornithine;arginine metabolic process;biological regulation;biosynthetic process;carboxylic acid catabolic process;carboxylic acid metabolic process;catabolic process;cellular amide metabolic process;cellular amine metabolic process;cellular amino acid catabolic proce…	cell part;cytoplasmic part;cytosol;intracellular part	40868000000	24989000000	15878000000	0.367908	0.439811	0.0766852	0.879823	2.3697	0.00246909	0.410679	5.84643	2.93693	0.000113475	0.713234	8.28935	5.67454	0.0436243	P00812	P00812	Arginase	XVI	339944	340945
HIS4	YCL030C	-0.363994	-0.271945	-0.226685	-0.933661	2N_1N;3N_1N	amine biosynthetic process;amine metabolic process;biosynthetic process;carboxylic acid biosynthetic process;carboxylic acid metabolic process;cellular amine metabolic process;cellular amino acid biosynthetic process;cellular amino acid metabolic process;cellular biosynthetic process;cellular ketone metabolic process;cellular metabolic process;cellular nitrogen compound biosynthetic process;cellu…		259450000000	122930000000	136510000000	2.79203	0.00220045	0.415503	7.59259	2.87164	0.00121046	0.535237	7.96854	0.740013	0.0713897	-0.0899093	-1.61335	6.40369	0.0451051	P00815	P00815	Histidine biosynthesis trifunctional protein;Phosphoribosyl-AMP cyclohydrolase;Phosphoribosyl-ATP pyrophosphohydrolase;Histidinol dehydrogenase	III	65934	68333
IPP1	YBR011C	-0.238853	-0.0185102	-0.0128975	0.0296176	2N_1N;3N_1N;4N_1N	cellular metabolic process;cellular process;metabolic process;phosphate-containing compound metabolic process;phosphorus metabolic process	cell part;cytoplasm;intracellular part	710210000000	384120000000	326090000000	4.5002	0	0.565488	20.7932	4.16608	0	0.630775	17.124	4.65802	0	0.754177	22.7852	13.3243	0.228519	P00817	P00817	Inorganic pyrophosphatase	II	257112	257975
ATP2	YJR121W	-1.23329	-0.716146	-0.237889	-0.26597	2N_1N;3N_1N;4N_1N	ATP biosynthetic process;ATP hydrolysis coupled proton transport;ATP metabolic process;ATP synthesis coupled proton transport;biosynthetic process;cation transport;cellular biosynthetic process;cellular metabolic process;cellular nitrogen compound biosynthetic process;cellular nitrogen compound metabolic process;cellular process;energy coupled proton transport. against electrochemical gradient;en…	cell part;cytoplasmic part;cytosol;intracellular organelle part;intracellular part;macromolecular complex;membrane;membrane part;membrane-enclosed lumen;mitochondrial inner membrane;mitochondrial intermembrane space;mitochondrial membrane;mitochondrial membrane part;mitochondrial part;mitochondrial proton-transporting ATP synthase. catalytic core;organelle envelope lumen;organelle inner membrane;…	417990000000	201720000000	216270000000	2.21096	0.00479389	0.824902	5.28426	3.02638	0.000949153	1.35703	8.74788	3.15081	0.000131868	1.45496	9.42456	8.38814	0.0603032	P00830	P00830	ATP synthase subunit beta. mitochondrial	X	647607	649142
CIT1	YNR001C	-0.49303	-0.99031	-0.168226	-0.307414	3N_1N;4N_1N	acetyl-CoA catabolic process;acetyl-CoA metabolic process;amine biosynthetic process;amine metabolic process;biosynthetic process;carbohydrate metabolic process;carboxylic acid biosynthetic process;carboxylic acid metabolic process;catabolic process;cellular amine metabolic process;cellular amino acid biosynthetic process;cellular amino acid metabolic process;cellular biosynthetic process;cellula…	cell part;cytoplasmic part;cytosol;intracellular membrane-bounded organelle;intracellular organelle;intracellular organelle lumen;intracellular organelle part;intracellular part;membrane-bounded organelle;membrane-enclosed lumen;mitochondrial intermembrane space;mitochondrial matrix;mitochondrial part;mitochondrion;organelle;organelle envelope lumen;organelle lumen;organelle part	119130000000	57157000000	61969000000	0.116273	0.860501	0.105283	0.319816	1.37449	0.012514	0.941117	2.94403	1.33031	0.0128847	0.910024	2.84268	2.82107	0.120274	P00890	P00890	Citrate synthase. mitochondrial	XIV	629622	631061
TRP2	YER090W	-0.386609	-0.159743	0.42116	0.383308	3N_1N;4N_1N	amine biosynthetic process;amine metabolic process;aromatic amino acid family biosynthetic process;aromatic amino acid family metabolic process;aromatic compound biosynthetic process;biosynthetic process;carboxylic acid biosynthetic process;carboxylic acid metabolic process;cellular amine metabolic process;cellular amino acid biosynthetic process;cellular amino acid metabolic process;cellular aro…	anthranilate synthase complex;cell part;cytoplasmic part;intracellular part;macromolecular complex;protein complex	61917000000	35703000000	26215000000	0.755182	0.12189	0.40788	1.64304	1.81608	0.00517026	0.981278	4.06603	1.97327	0.00174947	1.13577	4.5229	4.54454	0.0491161	P00899	P00899	Anthranilate synthase component 1	V	337949	339472
ENO1	YGR254W	-1.38792	-0.929171	-1.1908	-1.21846	2N_1N;3N_1N;4N_1N	alcohol biosynthetic process;alcohol catabolic process;alcohol metabolic process;biological regulation;biosynthetic process;carbohydrate biosynthetic process;carbohydrate catabolic process;carbohydrate metabolic process;catabolic process;cellular biosynthetic process;cellular carbohydrate biosynthetic process;cellular carbohydrate catabolic process;cellular carbohydrate metabolic process;cellular…	cell part;cytoplasmic part;cytosolic part;fungal-type vacuole;intracellular membrane-bounded organelle;intracellular organelle;intracellular part;lytic vacuole;macromolecular complex;membrane-bounded organelle;mitochondrion;organelle;phosphopyruvate hydratase complex;protein complex;storage vacuole;vacuole	841080000000	298800000000	542280000000	3.1955	0.00122302	0.831475	9.67921	2.7003	0.00159284	0.616876	7.17905	2.35869	0.000455008	0.685855	5.80594	8.25449	0.0588537	P00924	P00924	Enolase 1	VII	1000927	1002240
ENO2	YHR174W	-0.14855	0.178759	0.0922296	-0.17609	2N_1N;3N_1N;4N_1N	alcohol biosynthetic process;alcohol catabolic process;alcohol metabolic process;biological regulation;biosynthetic process;carbohydrate biosynthetic process;carbohydrate catabolic process;carbohydrate metabolic process;catabolic process;cellular biosynthetic process;cellular carbohydrate biosynthetic process;cellular carbohydrate catabolic process;cellular carbohydrate metabolic process;cellular…	cell part;cytoplasmic part;cytosolic part;fungal-type vacuole;internal side of plasma membrane;intracellular membrane-bounded organelle;intracellular organelle;intracellular part;lytic vacuole;macromolecular complex;membrane part;membrane-bounded organelle;mitochondrion;organelle;phosphopyruvate hydratase complex;plasma membrane part;protein complex;storage vacuole;vacuole	6644500000000	3617500000000	3027100000000	3.26649	0.00096875	0.703058	10.0969	2.99064	0.000914286	0.686778	8.56197	2.74073	0.000100418	0.509848	7.35879	8.99786	0.0686723	P00925	P00925	Enolase 2	VIII	451327	452640
ILV1	YER086W	-0.683576	-0.386427	0.25627	0.282977	2N_1N;3N_1N;4N_1N	amine biosynthetic process;amine catabolic process;amine metabolic process;aspartate family amino acid catabolic process;aspartate family amino acid metabolic process;biosynthetic process;branched chain family amino acid biosynthetic process;branched chain family amino acid metabolic process;carboxylic acid biosynthetic process;carboxylic acid catabolic process;carboxylic acid metabolic process;c…	cell part;cytoplasmic part;intracellular membrane-bounded organelle;intracellular organelle;intracellular part;membrane-bounded organelle;mitochondrion;organelle	90667000000	50884000000	39782000000	2.11698	0.00582072	0.753836	4.97236	3.16195	0.000727273	1.44615	9.48748	3.35174	0.000152866	1.62448	10.6209	8.63067	0.0630488	P00927	P00927	Threonine dehydratase. mitochondrial	V	328477	330207
TRP5	YGL026C	-0.274808	0.0655308	0.215459	0.22896	2N_1N;3N_1N;4N_1N	amine biosynthetic process;amine metabolic process;aromatic amino acid family biosynthetic process;aromatic amino acid family metabolic process;aromatic compound biosynthetic process;biosynthetic process;carboxylic acid biosynthetic process;carboxylic acid metabolic process;cellular amine metabolic process;cellular amino acid biosynthetic process;cellular amino acid metabolic process;cellular aro…		336960000000	192780000000	144180000000	3.03066	0.00193623	0.700217	8.7704	3.68228	0	0.900007	12.9066	3.76812	0	1.04085	13.5731	10.4811	0.0993514	P00931	P00931	Tryptophan synthase	VII	446412	448535
TRP3	YKL211C	-0.566447	-0.192849	0.652135	0.267618	2N_1N;3N_1N;4N_1N	amine biosynthetic process;amine metabolic process;aromatic amino acid family biosynthetic process;aromatic amino acid family metabolic process;aromatic compound biosynthetic process;biosynthetic process;carboxylic acid biosynthetic process;carboxylic acid metabolic process;cellular amine metabolic process;cellular amino acid biosynthetic process;cellular amino acid metabolic process;cellular aro…	anthranilate synthase complex;cell part;cytoplasmic part;intracellular part;macromolecular complex;protein complex	66941000000	45051000000	21890000000	1.79098	0.0104345	0.58384	3.99618	3.34982	0.000657845	1.4767	10.6088	2.8977	0.000110983	1.16804	8.0952	8.0385	0.0561261	P00937	P00937	Multifunctional tryptophan biosynthesis protein;Anthranilate synthase component 2;Indole-3-glycerol phosphate synthase	XI	36699	38153
TPI1	YDR050C	0.426966	-0.0686848	-0.0131692	-0.128491		alcohol biosynthetic process;alcohol catabolic process;alcohol metabolic process;biosynthetic process;carbohydrate biosynthetic process;carbohydrate catabolic process;carbohydrate metabolic process;catabolic process;cellular biosynthetic process;cellular carbohydrate biosynthetic process;cellular carbohydrate catabolic process;cellular carbohydrate metabolic process;cellular metabolic process;cel…	cell part;cytoplasmic part;intracellular membrane-bounded organelle;intracellular organelle;intracellular part;membrane-bounded organelle;mitochondrion;organelle	983130000000	531050000000	452080000000	0.0606663	0.933801	-0.0424191	-0.174935	0.128864	0.858166	0.0859385	0.351063	0.0513281	0.968982	0.036483	0.149317	0.240859	0.989907	P00942	P00942	Triosephosphate isomerase	IV	555726	556472
GPM1	YKL152C	0.0324921	0.0411505	-0.116558	-0.580224	2N_1N;3N_1N;4N_1N	alcohol biosynthetic process;alcohol catabolic process;alcohol metabolic process;biosynthetic process;carbohydrate biosynthetic process;carbohydrate catabolic process;carbohydrate metabolic process;catabolic process;cellular biosynthetic process;cellular carbohydrate biosynthetic process;cellular carbohydrate catabolic process;cellular carbohydrate metabolic process;cellular metabolic process;cel…	cell part;cytoplasmic part;cytosol;intracellular membrane-bounded organelle;intracellular organelle;intracellular organelle part;intracellular part;membrane-bounded organelle;membrane-enclosed lumen;mitochondrial intermembrane space;mitochondrial part;mitochondrion;organelle;organelle envelope lumen;organelle part	1772200000000	876400000000	895760000000	2.34197	0.0036204	0.322338	5.74484	1.88007	0.00443553	0.257306	4.24786	1.04902	0.0268981	-0.138954	-2.23286	5.27105	0.0441299	P00950	P00950	Phosphoglycerate mutase 1	XI	163642	164385
MES1	YGR264C	-0.491403	0.00566486	0.482778	0.44015	2N_1N;3N_1N;4N_1N	amine metabolic process;amino acid activation;carboxylic acid metabolic process;cellular amine metabolic process;cellular amino acid metabolic process;cellular ketone metabolic process;cellular macromolecule metabolic process;cellular metabolic process;cellular nitrogen compound metabolic process;cellular process;macromolecule metabolic process;metabolic process;methionyl-tRNA aminoacylation;ncRN…	cell part;cytoplasm;cytoplasmic part;intracellular part;macromolecular complex;methionyl glutamyl tRNA synthetase complex;protein complex	347000000000	207920000000	139070000000	3.34991	0.00108297	0.79945	10.6095	5.54695	0	1.37792	38.087	5.27723	0	1.42558	32.596	14.1741	0.282929	P00958	P00958	Methionine--tRNA ligase. cytoplasmic	VII	1019598	1021853
PAI3	YMR174C	1.97521	0.0670424	-0.222343	-1.16234	2N_1N;3N_1N;4N_1N	biological regulation;catabolic process;cellular catabolic process;cellular macromolecule catabolic process;cellular macromolecule metabolic process;cellular metabolic process;cellular process;cellular protein catabolic process;cellular protein metabolic process;macromolecule catabolic process;macromolecule metabolic process;metabolic process;negative regulation of catalytic activity;negative reg…		11473000000	6177200000	5295900000	4.25057	0	-1.53909	-17.9869	5.1198	0	-1.73144	-29.7626	5.61191	0	-2.60068	-39.5415	14.9823	0.312684	P01094	P01094	Protease A inhibitor 3	XIII	610159	610365
INH1	YDL181W	0.752552	-0.336052	-0.832352	-0.689846	3N_1N;4N_1N	biological regulation;negative regulation of ATPase activity;negative regulation of biological process;negative regulation of catalytic activity;negative regulation of cellular metabolic process;negative regulation of cellular process;negative regulation of hydrolase activity;negative regulation of metabolic process;negative regulation of molecular function;negative regulation of nitrogen compoun…	cell part;cytoplasmic part;intracellular membrane-bounded organelle;intracellular organelle;intracellular part;membrane-bounded organelle;mitochondrion;organelle	53503000000	24783000000	28720000000	0.759251	0.120413	-0.496492	-1.65102	1.51585	0.00916969	-0.961079	-3.28039	1.21959	0.0175828	-0.745202	-2.59582	3.49469	0.0765748	P01097	P01097	ATPase inhibitor. mitochondrial	IV	135179	135436
STF1	YDL130W-A	0.766128	-0.02678	-0.892299	-0.989418	2N_1N;3N_1N;4N_1N	biological regulation;negative regulation of ATPase activity;negative regulation of biological process;negative regulation of catalytic activity;negative regulation of cellular metabolic process;negative regulation of cellular process;negative regulation of hydrolase activity;negative regulation of metabolic process;negative regulation of molecular function;negative regulation of nitrogen compoun…	cell part;cytoplasmic part;intracellular membrane-bounded organelle;intracellular organelle;intracellular part;membrane-bounded organelle;mitochondrion;organelle	50486000000	28794000000	21692000000	1.5096	0.0159111	-0.518814	-3.26511	3.58416	0.000814988	-1.1917	-12.1833	2.80335	0.000103896	-1.1382	-7.64504	7.89711	0.0548872	P01098	P01098	ATPase-stabilizing factor 9 kDa. mitochondrial	IV	229171	229431
RAS1	YOR101W	0.428365	0.327115	0.102393	0.0400812		activation of adenylate cyclase activity;activation of adenylate cyclase activity by G-protein signaling pathway;aging;biological regulation;cAMP-mediated signaling;cell aging;cell surface receptor linked signaling pathway;cellular process;cellular response to stimulus;cyclic-nucleotide-mediated signaling;developmental process;G-protein coupled receptor protein signaling pathway;G-protein signali…	cell part;membrane;plasma membrane	7742400000	4537100000	3205200000	0.123267	0.851449	0.103874	0.337236	0.0571953	0.950426	-0.0437533	-0.165462	0.088022	0.922598	-0.0694318	-0.247729	0.268485	0.980765	P01119	P01119	Ras-like protein 1	XV	515244	516173
RAS2	YNL098C	0.265956	0.115848	-0.392725	-0.200271	3N_1N	activation of adenylate cyclase activity;aging;anatomical structure development;anatomical structure formation involved in morphogenesis;ascospore formation;biological regulation;carbon catabolite activation of transcription;carbon catabolite regulation of transcription;cell aging;cell communication;cell development;cell differentiation;cellular developmental process;cellular process;cellular pro…	cell part;cytoplasmic part;endoplasmic reticulum membrane;endoplasmic reticulum part;intracellular membrane-bounded organelle;intracellular organelle;intracellular organelle part;intracellular part;membrane;membrane part;membrane-bounded organelle;mitochondrion;nucleus;organelle;organelle membrane;organelle part;plasma membrane	89818000000	45001000000	44818000000	0.991329	0.0596302	0.213784	2.11411	1.12944	0.0238046	-0.214121	-2.40161	0.283108	0.546468	0.0596332	0.702558	2.40388	0.162531	P01120	P01120	Ras-like protein 2	XIV	439602	440570
YPT1	YFL038C	-0.936319	-0.475973	-0.117695	0.140223	2N_1N;3N_1N;4N_1N	autophagy;biological regulation;catabolic process;cell communication;cellular catabolic process;cellular component assembly;cellular component disassembly;cellular component disassembly at cellular level;cellular component organization;cellular component organization at cellular level;cellular component organization or biogenesis;cellular component organization or biogenesis at cellular level;cel…	cell part;cytoplasmic part;cytoplasmic vesicle;endoplasmic reticulum membrane;endoplasmic reticulum part;Golgi apparatus part;Golgi membrane;Golgi stack;intracellular organelle;intracellular organelle part;intracellular part;membrane;membrane part;organelle;organelle membrane;organelle part;pre-autophagosomal structure;pre-autophagosomal structure membrane;trans-Golgi network;vesicle	162290000000	90991000000	71303000000	2.53049	0.00301031	0.767787	6.46535	3.41131	0.000686391	1.19053	11.0022	3.82763	0	1.53054	14.0545	9.76943	0.084662	P01123	P01123	GTP-binding protein YPT1	VI	55366	55986
HTB2	YBL002W	0.297571	-0.169346	-0.519691	-0.410568	3N_1N;4N_1N	cellular component organization;cellular component organization at cellular level;cellular component organization or biogenesis;cellular component organization or biogenesis at cellular level;cellular process;chromatin assembly or disassembly;chromatin organization;chromosome organization;organelle organization	cell part;chromosomal part;intracellular organelle part;intracellular part;macromolecular complex;nuclear chromosome part;nuclear nucleosome;nuclear part;nucleosome;organelle part;protein complex;protein-DNA complex;replication fork protection complex	1179700000000	593710000000	585970000000	0.946216	0.06768	-0.175831	-2.02243	2.22498	0.00309591	-0.467797	-5.33207	1.50278	0.00845552	-0.281408	-3.24848	4.67397	0.0477893	P02294	P02294	Histone H2B.2	II	236492	236887
HHF1	YBR009C;YNL030W	0.450085	-0.0265223	-0.447336	-0.377561	3N_1N;4N_1N	anatomical structure formation involved in morphogenesis;cell differentiation;cellular component assembly;cellular component assembly at cellular level;cellular component organization;cellular component organization at cellular level;cellular component organization or biogenesis;cellular component organization or biogenesis at cellular level;cellular developmental process;cellular macromolecular …	cell part;chromosomal part;intracellular organelle part;intracellular part;macromolecular complex;nuclear chromosome part;nuclear nucleosome;nuclear part;nucleosome;organelle part;protein complex;protein-DNA complex;replication fork protection complex	381470000000	184130000000	197340000000	0.738043	0.127743	-0.11108	-1.6095	2.69865	0.00158929	-0.463456	-7.17176	2.1652	0.000851593	-0.325635	-5.13055	5.60189	0.0435581	P02309	P02309	Histone H4
VAR1	Q0140	-1.21188	-0.639962	-0.0717367	0.0100068	2N_1N;3N_1N;4N_1N	biosynthetic process;cellular biosynthetic process;cellular component organization;cellular component organization at cellular level;cellular component organization or biogenesis;cellular component organization or biogenesis at cellular level;cellular macromolecule biosynthetic process;cellular macromolecule metabolic process;cellular metabolic process;cellular process;cellular protein metabolic …	cell part;cytoplasmic part;intracellular organelle part;intracellular part;macromolecular complex;mitochondrial part;mitochondrial small ribosomal subunit;organellar small ribosomal subunit;organelle part;ribonucleoprotein complex;small ribosomal subunit	7063700000	3984200000	3079500000	1.11465	0.0445988	0.907431	3.39723	2.23219	0.00302349	1.48353	7.05282	2.3097	0.000441516	1.68052	7.50522	5.65654	0.0435338	P02381	P02381	Ribosomal protein VAR1. mitochondrial	Mito	48901	50097
RPP2B	YDR382W	1.15054	0.411857	0.079339	-0.354364	2N_1N;3N_1N;4N_1N	biological regulation;biosynthetic process;cellular biosynthetic process;cellular macromolecule biosynthetic process;cellular macromolecule metabolic process;cellular metabolic process;cellular process;cellular protein metabolic process;cytoplasmic translation;macromolecule biosynthetic process;macromolecule metabolic process;metabolic process;positive regulation of catalytic activity;positive re…	cell part;cytosolic large ribosomal subunit;intracellular organelle part;intracellular part;large ribosomal subunit;macromolecular complex;organelle part;ribonucleoprotein complex	639440000000	359380000000	280060000000	2.66506	0.00232755	-0.409501	-7.02554	3.37599	0.000667946	-0.689126	-10.7746	4.1638	0	-1.01617	-17.1013	10.2048	0.0938824	P02400	P02400	60S acidic ribosomal protein P2-beta	IV	1239492	1239824
RPL28	YGL103W	1.14069	0.43426	0.094277	-0.205745	2N_1N;3N_1N;4N_1N	biosynthetic process;cellular biosynthetic process;cellular macromolecule biosynthetic process;cellular macromolecule metabolic process;cellular metabolic process;cellular process;cellular protein metabolic process;cytoplasmic translation;macromolecule biosynthetic process;macromolecule metabolic process;metabolic process;primary metabolic process;protein metabolic process;response to antibiotic;…	cell part;cytosolic large ribosomal subunit;intracellular membrane-bounded organelle;intracellular organelle;intracellular organelle part;intracellular part;large ribosomal subunit;macromolecular complex;membrane-bounded organelle;nucleus;organelle;organelle part;ribonucleoprotein complex	696390000000	401320000000	295070000000	1.58665	0.0144564	-0.476358	-3.45639	2.31857	0.00270442	-0.782053	-5.66028	2.67249	0.000302419	-0.968039	-7.05765	6.57771	0.0459089	P02406	P02406	60S ribosomal protein L28	VII	310967	311927
RPS17B;RPS17A	YDR447C;YML024W	1.11033	0.421933	0.0654146	-0.224931	2N_1N;3N_1N;4N_1N	biosynthetic process;cellular biosynthetic process;cellular component assembly;cellular component assembly at cellular level;cellular component organization;cellular component organization at cellular level;cellular component organization or biogenesis;cellular component organization or biogenesis at cellular level;cellular macromolecular complex assembly;cellular macromolecular complex subunit o…	cell part;cytosolic small ribosomal subunit;intracellular organelle part;intracellular part;macromolecular complex;organelle part;ribonucleoprotein complex;small ribosomal subunit	1323100000000	755470000000	567680000000	1.9648	0.00742383	-0.293918	-4.49739	2.92862	0.000873862	-0.583119	-8.24788	3.55266	0	-0.785384	-11.9594	8.44609	0.0611216	P14127;P02407	P14127;P02407	40S ribosomal protein S17-B;40S ribosomal protein S17-A
TUB2	YFL037W	-0.935612	-0.535867	-0.0777248	-0.0231211	2N_1N;3N_1N;4N_1N	cell cycle process;cellular component assembly;cellular component assembly at cellular level;cellular component movement;cellular component organization;cellular component organization at cellular level;cellular component organization or biogenesis;cellular component organization or biogenesis at cellular level;cellular macromolecular complex assembly;cellular macromolecular complex subunit organ…	cell part;cytoplasmic microtubule;cytoplasmic part;cytoskeletal part;intracellular organelle part;intracellular part;kinetochore microtubule;macromolecular complex;microtubule;microtubule organizing center;nuclear microtubule;nuclear part;organelle part;protein complex;spindle microtubule;spindle pole body;tubulin complex	50916000000	28208000000	22709000000	3.29456	0.00100813	0.780341	10.2668	3.93191	0	1.33379	14.9383	4.26519	0	1.45265	18.1404	11.4917	0.135307	P02557	P02557	Tubulin beta chain	VI	56336	57709
HSP82	YPL240C	-0.787996	-0.412893	0.0539838	-0.327756	2N_1N;3N_1N;4N_1N	biological regulation;box C/D snoRNP assembly;cellular component assembly;cellular component assembly at cellular level;cellular component organization;cellular component organization at cellular level;cellular component organization or biogenesis;cellular component organization or biogenesis at cellular level;cellular macromolecular complex assembly;cellular macromolecular complex subunit organi…	cell part;cytoplasm;intracellular part	90733000000	47678000000	43055000000	2.99865	0.00188169	0.726808	8.60334	4.04624	0	1.24811	15.9691	3.57143	0	0.933946	12.0923	10.6163	0.103377	P02829	P02829	ATP-dependent molecular chaperone HSP82	XVI	96496	98625
TUF1	YOR187W	-0.969369	-0.600316	-0.279709	-0.0860471	2N_1N;3N_1N;4N_1N	biosynthetic process;cellular biosynthetic process;cellular component organization;cellular component organization at cellular level;cellular component organization or biogenesis;cellular component organization or biogenesis at cellular level;cellular macromolecule biosynthetic process;cellular macromolecule metabolic process;cellular metabolic process;cellular process;cellular protein metabolic …	cell part;cytoplasmic part;intracellular membrane-bounded organelle;intracellular organelle;intracellular part;membrane-bounded organelle;mitochondrion;organelle	77692000000	40087000000	37605000000	3.0126	0.00189773	0.715425	8.67575	3.80801	0	1.1374	13.894	4.24508	0	1.4124	17.9296	11.0657	0.120101	P02992	P02992	Elongation factor Tu. mitochondrial	XV	684030	685343
TEF1	YBR118W;YPR080W	-0.437732	-0.119108	0.165247	0.334948	2N_1N;3N_1N;4N_1N	biosynthetic process;cellular biosynthetic process;cellular macromolecule biosynthetic process;cellular macromolecule metabolic process;cellular metabolic process;cellular process;establishment of localization;establishment of localization in cell;establishment of RNA localization;intracellular transport;macromolecule biosynthetic process;macromolecule metabolic process;metabolic process;nuclear …	cell part;cytoplasm;cytoplasmic part;cytoskeleton;eukaryotic translation elongation factor 1 complex;fungal-type vacuole membrane;intracellular membrane-bounded organelle;intracellular non-membrane-bounded organelle;intracellular organelle;intracellular organelle part;intracellular part;macromolecular complex;membrane;membrane-bounded organelle;mitochondrion;non-membrane-bounded organelle;organel…	5136600000000	2826200000000	2310400000000	2.28399	0.00416107	0.58745	5.53718	3.11893	0.000689864	0.941927	9.24677	3.55747	0	1.20624	11.9933	8.9604	0.0681401	P02994	P02994	Elongation factor 1-alpha
REP1		-1.61225	-0.15421	-0.351415	0.208751	2N_1N;3N_1N;4N_1N	2-micrometer plasmid partitioning;cellular localization;cellular macromolecule localization;cellular process;cellular protein localization;localization;macromolecule localization;plasmid maintenance;plasmid partitioning;protein localization	cell part;intracellular membrane-bounded organelle;intracellular organelle;intracellular part;membrane-bounded organelle;nucleus;organelle	3875700000	1979100000	1896700000	1.1939	0.0355285	1.81482	2.5399	1.05944	0.0298091	1.59746	2.25451	1.1126	0.0231866	2.00205	2.36595	3.36595	0.0827187	P03871	P03871	Partitioning protein REP1
REP2		-0.345447	0.483382	-0.581462	0.132684	2N_1N;4N_1N	2-micrometer plasmid partitioning;biological regulation;cellular process;plasmid maintenance;plasmid partitioning;posttranscriptional regulation of gene expression;protein stabilization;regulation of biological process;regulation of biological quality;regulation of gene expression;regulation of macromolecule metabolic process;regulation of metabolic process;regulation of protein stability	cell part;intracellular membrane-bounded organelle;intracellular organelle;intracellular part;membrane-bounded organelle;nucleus;organelle	14175000000	8147300000	6028100000	1.77066	0.0106617	1.07228	3.94023	0.00135147	1	0.00110791	0.00414274	1.34573	0.012225	0.779048	2.87786	3.11774	0.0977212	P03872	P03872	Partitioning protein REP2
CPA2	YJR109C	0.375452	0.749279	1.3872	0.982051	2N_1N;3N_1N;4N_1N	amine biosynthetic process;amine metabolic process;arginine biosynthetic process;arginine metabolic process;biosynthetic process;carboxylic acid biosynthetic process;carboxylic acid metabolic process;cellular amine metabolic process;cellular amino acid biosynthetic process;cellular amino acid metabolic process;cellular biosynthetic process;cellular ketone metabolic process;cellular metabolic proc…	carbamoyl-phosphate synthase complex;cell part;cytoplasmic part;intracellular part;macromolecular complex;protein complex	145820000000	93132000000	52689000000	2.68811	0.00220118	0.631236	7.12561	4.3199	0	1.41007	18.7267	3.91339	0	1.05581	14.7775	10.9214	0.115237	P03965	P03965	Carbamoyl-phosphate synthase arginine-specific large chain	X	629585	632941
COX4	YGL187C	0.769972	0.0857261	-0.374335	-0.252993	2N_1N;3N_1N;4N_1N	aerobic respiration;cellular component assembly;cellular component assembly at cellular level;cellular component biogenesis;cellular component organization;cellular component organization at cellular level;cellular component organization or biogenesis;cellular component organization or biogenesis at cellular level;cellular macromolecular complex assembly;cellular macromolecular complex subunit or…	cell part;cytoplasmic part;intracellular membrane-bounded organelle;intracellular organelle;intracellular organelle part;intracellular part;macromolecular complex;membrane;membrane part;membrane-bounded organelle;membrane-enclosed lumen;mitochondrial inner membrane;mitochondrial intermembrane space;mitochondrial membrane;mitochondrial membrane part;mitochondrial part;mitochondrial respiratory cha…	40017000000	20574000000	19443000000	2.03941	0.0064253	-0.321071	-4.72578	3.00549	0.000932039	-0.829275	-8.63875	2.35267	0.000453469	-0.625326	-5.78389	7.39757	0.0504024	P04037	P04037	Cytochrome c oxidase subunit 4. mitochondrial	VII	149704	150171
COX8	YLR395C	NaN	-0.291703	-0.604142	-0.344588		cellular metabolic process;cellular process;electron transport chain;generation of precursor metabolites and energy;metabolic process;mitochondrial electron transport. cytochrome c to oxygen;oxidation-reduction process;respiratory electron transport chain	cell part;cytoplasmic part;intracellular organelle part;intracellular part;macromolecular complex;membrane part;mitochondrial membrane part;mitochondrial part;mitochondrial respiratory chain complex IV;organelle part;protein complex;respiratory chain complex IV	10395000000	5294500000	5100200000	0	0.95797	NaN	0	0	0.950933	NaN	0	0	1	NaN	0	0	1	P04039	P04039	Cytochrome c oxidase polypeptide VIII. mitochondrial	XII	909729	909965
ADE4	YMR300C	-0.897198	-0.2434	-0.889268	-0.818727	2N_1N;3N_1N;4N_1N	amine metabolic process;biosynthetic process;carboxylic acid metabolic process;cellular amine metabolic process;cellular amino acid metabolic process;cellular aromatic compound metabolic process;cellular biosynthetic process;cellular ketone metabolic process;cellular metabolic process;cellular nitrogen compound biosynthetic process;cellular nitrogen compound metabolic process;cellular process;'de…		58081000000	25252000000	32829000000	2.7728	0.00215251	0.959447	7.50415	3.61894	0	0.414283	12.4351	2.79696	0.000103784	0.568845	7.6154	9.1887	0.0721845	P04046	P04046	Amidophosphoribosyltransferase	XIII	865559	867091
RPO21	YDL140C	-1.12847	-0.125138	0.139528	0.194427	2N_1N;3N_1N;4N_1N	biosynthetic process;cellular biosynthetic process;cellular macromolecule biosynthetic process;cellular macromolecule metabolic process;cellular metabolic process;cellular nitrogen compound metabolic process;cellular process;cellular response to stimulus;cellular response to stress;DNA biosynthetic process;DNA metabolic process;DNA repair;macromolecule biosynthetic process;macromolecule metabolic…	cell part;DNA-directed RNA polymerase complex;DNA-directed RNA polymerase II. core complex;intracellular membrane-bounded organelle;intracellular organelle;intracellular organelle part;intracellular part;macromolecular complex;membrane-bounded organelle;nuclear DNA-directed RNA polymerase complex;nuclear part;nucleoplasm part;nucleus;organelle;organelle part;protein complex;RNA polymerase complex	80214000000	46610000000	33604000000	2.36416	0.00355036	1.19806	5.826	2.8076	0.00142413	1.52046	7.66484	2.99367	0.000117216	1.70591	8.57758	8.16543	0.0580093	P04050	P04050	DNA-directed RNA polymerase II subunit RPB1	IV	205360	210561
RPO31	YOR116C	-0.274206	0.171261	0.511726	0.266225	2N_1N;3N_1N;4N_1N	biosynthetic process;cellular biosynthetic process;cellular macromolecule biosynthetic process;cellular macromolecule metabolic process;cellular metabolic process;cellular nitrogen compound metabolic process;cellular process;macromolecule biosynthetic process;macromolecule metabolic process;metabolic process;nitrogen compound metabolic process;nucleic acid metabolic process;nucleobase-containing …	cell part;DNA-directed RNA polymerase complex;DNA-directed RNA polymerase III complex;intracellular organelle part;intracellular part;macromolecular complex;nuclear DNA-directed RNA polymerase complex;nuclear part;nucleoplasm;nucleoplasm part;organelle part;protein complex;RNA polymerase complex	20490000000	12312000000	8178200000	2.27862	0.00458902	0.732864	5.51825	3.15603	0.000720379	1.19888	9.45398	2.88289	0.000108967	1.01917	8.02301	8.31753	0.0594231	P04051	P04051	DNA-directed RNA polymerase III subunit RPC1	XV	539763	544145
ARG4	YHR018C	-0.0753045	-0.0542193	0.959301	0.907231	2N_1N;3N_1N;4N_1N	amine biosynthetic process;amine metabolic process;arginine biosynthetic process;arginine biosynthetic process via ornithine;arginine metabolic process;biosynthetic process;carboxylic acid biosynthetic process;carboxylic acid metabolic process;cellular amine metabolic process;cellular amino acid biosynthetic process;cellular amino acid metabolic process;cellular biosynthetic process;cellular keto…	cell part;cytoplasmic part;cytosol;intracellular part	87684000000	61305000000	26380000000	1.90249	0.00860241	0.400792	4.3129	4.08857	0	1.49885	16.3681	4.21627	0	1.5204	17.6316	10.2073	0.0944379	P04076	P04076	Argininosuccinate lyase	VIII	140011	141402
PAB1	YER165W	0.296293	0.257473	0.153123	0.130517	2N_1N;3N_1N;4N_1N	biological regulation;cellular macromolecule metabolic process;cellular metabolic process;cellular nitrogen compound metabolic process;cellular process;establishment of localization;establishment of RNA localization;macromolecule metabolic process;metabolic process;mRNA metabolic process;mRNA processing;mRNA transport;negative regulation of catalytic activity;negative regulation of molecular func…	cell part;cytoplasm;cytoplasmic part;intracellular membrane-bounded organelle;intracellular non-membrane-bounded organelle;intracellular organelle;intracellular part;macromolecular complex;membrane-bounded organelle;non-membrane-bounded organelle;nucleus;organelle;ribonucleoprotein complex;ribosome;RNA granule;stress granule	1114000000000	644290000000	469730000000	2.83387	0.00206481	0.321192	7.78814	2.36528	0.00246014	0.294541	5.83014	2.83308	0.000106077	0.366074	7.78438	8.03223	0.056	P04147	P04147	Polyadenylate-binding protein. cytoplasmic and nuclear	V	510373	512106
ADE8	YDR408C	-0.559546	-0.146878	-0.467405	-0.591744	2N_1N;3N_1N;4N_1N	adenine biosynthetic process;adenine metabolic process;biosynthetic process;cellular aromatic compound metabolic process;cellular biosynthetic process;cellular metabolic process;cellular nitrogen compound biosynthetic process;cellular nitrogen compound metabolic process;cellular process;'de novo' IMP biosynthetic process;heterocycle biosynthetic process;heterocycle metabolic process;IMP biosynthe…		14835000000	7063000000	7771700000	3.17669	0.00119298	0.713482	9.57128	2.03705	0.00344954	0.448849	4.71842	1.86319	0.00289674	0.369363	4.19936	7.07693	0.0482802	P04161	P04161	Phosphoribosylglycinamide formyltransferase	IV	1288215	1288859
RPL24A	YGL031C	1.14152	0.366374	0.148314	-0.249299	2N_1N;3N_1N;4N_1N	biosynthetic process;cellular biosynthetic process;cellular macromolecule biosynthetic process;cellular macromolecule metabolic process;cellular metabolic process;cellular process;cellular protein metabolic process;cytoplasmic translation;macromolecule biosynthetic process;macromolecule metabolic process;metabolic process;primary metabolic process;protein metabolic process;translation	cell part;cytosolic large ribosomal subunit;intracellular organelle part;intracellular part;large ribosomal subunit;macromolecular complex;organelle part;ribonucleoprotein complex	158520000000	89700000000	68816000000	2.90733	0.00169543	-0.415881	-8.14247	2.68726	0.00157871	-0.635264	-7.12188	4.35144	0	-0.864008	-19.073	9.94603	0.0892045	P04449	P04449	60S ribosomal protein L24-A	VII	437467	437934
RPL25	YOL127W	1.14937	0.441853	0.0425017	-0.237912	2N_1N;3N_1N;4N_1N	biosynthetic process;cellular biosynthetic process;cellular component assembly;cellular component assembly at cellular level;cellular component organization;cellular component organization at cellular level;cellular component organization or biogenesis;cellular component organization or biogenesis at cellular level;cellular macromolecular complex assembly;cellular macromolecular complex subunit o…	cell part;cytosolic large ribosomal subunit;intracellular organelle part;intracellular part;large ribosomal subunit;macromolecular complex;organelle part;ribonucleoprotein complex	771570000000	442500000000	329070000000	2.07692	0.00595307	-0.402992	-4.84382	2.95511	0.000887715	-0.72697	-8.38073	3.39989	0.000159468	-0.926272	-10.9281	8.43192	0.0609147	P04456	P04456	60S ribosomal protein L25	XV	80348	81190
TOP1	YOL006C	0.0283486	-0.00483892	-0.110729	-0.0270097	2N_1N;3N_1N;4N_1N	biological regulation;biosynthetic process;cell cycle process;cellular biosynthetic process;cellular component organization;cellular component organization at cellular level;cellular component organization or biogenesis;cellular component organization or biogenesis at cellular level;cellular macromolecule metabolic process;cellular metabolic process;cellular nitrogen compound metabolic process;ce…	cell part;chromosomal part;intracellular membrane-bounded organelle;intracellular non-membrane-bounded organelle;intracellular organelle;intracellular organelle part;intracellular part;macromolecular complex;membrane-bounded organelle;non-membrane-bounded organelle;nuclear chromosome part;nuclear part;nucleolus;nucleoplasm;nucleus;organelle;organelle part;protein complex;replication fork protecti…	24839000000	14430000000	10408000000	1.44525	0.0184928	0.344102	3.11001	1.20812	0.0193509	0.333187	2.5708	1.89799	0.00261528	0.48774	4.29979	4.55136	0.0490785	P04786	P04786	DNA topoisomerase 1	XV	313078	315387
THS1	YIL078W	-0.389312	-0.286762	0.280643	0.311372	2N_1N;3N_1N;4N_1N	amine metabolic process;amino acid activation;biosynthetic process;carboxylic acid metabolic process;cellular amine metabolic process;cellular amino acid metabolic process;cellular biosynthetic process;cellular ketone metabolic process;cellular macromolecule biosynthetic process;cellular macromolecule metabolic process;cellular metabolic process;cellular nitrogen compound metabolic process;cellul…	cell part;cytoplasm;intracellular part	363770000000	211240000000	152530000000	1.45838	0.0183593	0.516659	3.14132	2.74294	0.00165197	1.17445	7.36868	2.9094	0.000111628	1.30031	8.15266	7.11071	0.0485125	P04801	P04801	Threonine--tRNA ligase. cytoplasmic	IX	212499	214703
DPS1	YLL018C	-0.760198	-0.21733	0.19507	0.2238	2N_1N;3N_1N;4N_1N	amine metabolic process;amino acid activation;aspartyl-tRNA aminoacylation;carboxylic acid metabolic process;cellular amine metabolic process;cellular amino acid metabolic process;cellular ketone metabolic process;cellular macromolecule metabolic process;cellular metabolic process;cellular nitrogen compound metabolic process;cellular process;macromolecule metabolic process;metabolic process;ncRNA…	cell part;cytoplasm;intracellular membrane-bounded organelle;intracellular organelle;intracellular part;membrane-bounded organelle;nucleus;organelle	321320000000	182600000000	138720000000	3.32027	0.00102058	0.810469	10.4246	4.87688	0	1.32508	25.8631	5.02257	0	1.45551	28.1364	13.2197	0.220056	P04802	P04802	Aspartate--tRNA ligase. cytoplasmic	XII	109902	111575
MSW1	YDR268W	-0.155478	0.0983175	-0.337052	-0.173884	2N_1N;3N_1N;4N_1N	amine metabolic process;amino acid activation;carboxylic acid metabolic process;cellular amine metabolic process;cellular amino acid metabolic process;cellular ketone metabolic process;cellular macromolecule metabolic process;cellular metabolic process;cellular nitrogen compound metabolic process;cellular process;macromolecule metabolic process;metabolic process;mitochondrial RNA metabolic proces…	cell part;cytoplasmic part;intracellular membrane-bounded organelle;intracellular organelle;intracellular organelle lumen;intracellular organelle part;intracellular part;membrane-bounded organelle;membrane-enclosed lumen;mitochondrial matrix;mitochondrial part;mitochondrion;organelle;organelle lumen;organelle part	4243700000	2341900000	1901800000	2.2287	0.00473102	0.607299	5.34485	1.02823	0.032432	0.239003	2.18987	2.03187	0.00156977	0.555465	4.70231	5.28881	0.0441332	P04803	P04803	Tryptophan--tRNA ligase. mitochondrial	IV	1004004	1005143
HXK1	YFR053C	-1.29377	-1.69696	-1.09117	-0.699082	3N_1N;4N_1N	alcohol catabolic process;alcohol metabolic process;carbohydrate catabolic process;carbohydrate metabolic process;carbohydrate phosphorylation;carbohydrate transport;catabolic process;cellular carbohydrate catabolic process;cellular carbohydrate metabolic process;cellular metabolic process;cellular process;establishment of localization;fructose import;fructose metabolic process;fructose transport…	cell part;cytoplasm;cytoplasmic part;intracellular membrane-bounded organelle;intracellular organelle;intracellular part;membrane-bounded organelle;mitochondrion;organelle	451680000000	181110000000	270570000000	0.0570914	0.939132	0.0242821	0.165177	2.10394	0.00330751	0.646994	4.93023	3.01634	0.000118812	1.14576	8.69527	5.17737	0.0443353	P04806	P04806	Hexokinase-1	VI	253592	255049
HXK2	YGL253W	-0.525479	-0.0392243	0.343736	0.348001	2N_1N;3N_1N;4N_1N	aging;alcohol catabolic process;alcohol metabolic process;biological regulation;carbohydrate catabolic process;carbohydrate metabolic process;carbohydrate phosphorylation;carbohydrate transport;carbon catabolite regulation of transcription;catabolic process;cell aging;cell communication;cellular carbohydrate catabolic process;cellular carbohydrate metabolic process;cellular metabolic process;cell…	cell part;cytoplasmic part;cytosol;intracellular membrane-bounded organelle;intracellular organelle;intracellular part;membrane-bounded organelle;mitochondrion;nucleus;organelle	691180000000	397270000000	293920000000	3.33248	0.00105085	0.845501	10.5004	4.05986	0	1.31482	16.0964	4.07696	0	1.38122	16.2577	11.4693	0.134542	P04807	P04807	Hexokinase-2	VII	23935	25395
CDC9	YDL164C	-0.291052	-0.142604	-0.0327339	0.069227	2N_1N;3N_1N;4N_1N	base-excision repair;biosynthetic process;cell cycle;cell division;cellular biosynthetic process;cellular component organization;cellular component organization at cellular level;cellular component organization or biogenesis;cellular component organization or biogenesis at cellular level;cellular macromolecule biosynthetic process;cellular macromolecule metabolic process;cellular metabolic proces…	cell part;chromosomal part;cytoplasmic part;intracellular membrane-bounded organelle;intracellular organelle;intracellular organelle part;intracellular part;membrane-bounded organelle;mitochondrion;nucleus;organelle;organelle part;replication fork	7939700000	4539600000	3400100000	1.55598	0.0144693	0.527182	3.37949	2.49406	0.00179568	0.751487	6.32047	2.80898	0.000104461	0.940869	7.67127	6.85902	0.0468405	P04819	P04819	DNA ligase 1	IV	164987	167254
CDC25	YLR310C	-1.26393	-0.317949	0.0558351	-0.0247067	3N_1N;4N_1N	aging;biological regulation;cell aging;cell cycle phase;cell cycle process;cell division;cellular component organization;cellular component organization at cellular level;cellular component organization or biogenesis;cellular component organization or biogenesis at cellular level;cellular process;cellular response to stimulus;developmental process;intracellular signal transduction;mitosis;nuclear…	cell part;cytoplasm;cytoplasmic part;cytosol;endoplasmic reticulum membrane;endoplasmic reticulum part;integral to membrane;intracellular membrane-bounded organelle;intracellular organelle;intracellular organelle part;intracellular part;intrinsic to membrane;membrane;membrane part;membrane-bounded organelle;nucleus;organelle;organelle membrane;organelle part;plasma membrane	4703800000	2493900000	2209900000	1.04484	0.051138	0.967717	2.22419	1.27737	0.0157394	1.2144	2.72344	1.47724	0.00929723	1.40201	3.18661	3.79945	0.0642042	P04821	P04821	Cell division control protein 25	XII	752224	756993
POR1	YNL055C	-0.887053	-0.475123	-0.336075	-0.208538	2N_1N;3N_1N;4N_1N	apoptosis;biological regulation;cell death;cell redox homeostasis;cellular component organization;cellular component organization at cellular level;cellular component organization or biogenesis;cellular component organization or biogenesis at cellular level;cellular homeostasis;cellular process;death;DNA transport;establishment of localization;homeostatic process;ion transport;mitochondrion organ…	cell part;cytoplasmic part;integral to membrane;integral to mitochondrial membrane;integral to mitochondrial outer membrane;integral to organelle membrane;intracellular membrane-bounded organelle;intracellular organelle;intracellular organelle part;intracellular part;intrinsic to membrane;intrinsic to mitochondrial outer membrane;intrinsic to organelle membrane;macromolecular complex;membrane;mem…	717520000000	344010000000	373510000000	2.5405	0.00281944	0.841139	6.50565	2.85779	0.00134975	1.03602	7.90194	3.21268	0.00013617	1.2615	9.77881	8.61097	0.0627366	P04840	P04840	Mitochondrial outer membrane protein porin 1	XIV	517994	518845
HTA2;HTA1	YBL003C;YDR225W	0.83629	-0.101843	-0.486122	-0.434296	2N_1N;3N_1N;4N_1N	biological regulation;cellular component organization;cellular component organization at cellular level;cellular component organization or biogenesis;cellular component organization or biogenesis at cellular level;cellular macromolecule metabolic process;cellular metabolic process;cellular nitrogen compound metabolic process;cellular process;cellular response to stimulus;cellular response to stre…	cell part;chromosomal part;intracellular organelle part;intracellular part;macromolecular complex;nuclear chromosome part;nuclear nucleosome;nuclear part;nucleosome;organelle part;protein complex;protein-DNA complex;replication fork protection complex	242650000000	113940000000	128720000000	3.24	0.00129278	-0.584696	-9.93914	4.13909	0	-0.925774	-16.857	3.68421	0	-0.757159	-12.9213	11.0633	0.119519	P04912;P04911	P04912;P04911	Histone H2A.2;Histone H2A.1
PMA1	YGL008C	0.215442	0.123406	-0.00963279	0.000960211	2N_1N;3N_1N;4N_1N	ATP biosynthetic process;ATP metabolic process;biological regulation;biosynthetic process;cation homeostasis;cation transport;cellular biosynthetic process;cellular metabolic process;cellular nitrogen compound biosynthetic process;cellular nitrogen compound metabolic process;cellular process;chemical homeostasis;establishment of localization;heterocycle biosynthetic process;heterocycle metabolic …	cell part;integral to membrane;intrinsic to membrane;membrane;membrane part;membrane raft;plasma membrane	1613800000000	865020000000	748750000000	1.92062	0.00845795	0.231271	4.366	1.18833	0.0203291	0.150867	2.52782	2.19665	0.000605201	0.281439	5.2358	5.30559	0.0441008	P05030	P05030	Plasma membrane ATPase 1	VII	479910	482666
ARG3	YJL088W	1.1341	1.4124	2.18285	1.04271	2N_1N;3N_1N;4N_1N	amine biosynthetic process;amine metabolic process;arginine biosynthetic process;arginine metabolic process;biosynthetic process;carboxylic acid biosynthetic process;carboxylic acid metabolic process;cellular amine metabolic process;cellular amino acid biosynthetic process;cellular amino acid metabolic process;cellular biosynthetic process;cellular ketone metabolic process;cellular metabolic proc…	cell part;cytoplasmic part;cytosol;intracellular part	5132000000	3976800000	1155200000	1.8374	0.00987826	0.732746	4.126	2.26149	0.00298548	1.43763	5.45825	1.00965	0.0297717	0.404397	2.15164	5.10855	0.0448513	P05150	P05150	Ornithine carbamoyltransferase	X	268799	269815
RPP0	YLR340W	-1.33233	-0.429655	0.39863	0.2388	2N_1N;3N_1N;4N_1N	biosynthetic process;cellular biosynthetic process;cellular component assembly;cellular component assembly at cellular level;cellular component organization;cellular component organization at cellular level;cellular component organization or biogenesis;cellular component organization or biogenesis at cellular level;cellular macromolecular complex assembly;cellular macromolecular complex subunit o…	cell part;cytoplasm;cytosolic large ribosomal subunit;intracellular organelle part;intracellular part;large ribosomal subunit;macromolecular complex;organelle part;ribonucleoprotein complex	615810000000	330290000000	285520000000	4.85095	0	1.20546	25.4778	6.53486	0	2.1289	67.3123	6.32	0	2.06864	59.475	17.7058	0.380224	P05317	P05317	60S acidic ribosomal protein P0	XII	805887	806825
RPP1A	YDL081C	1.33784	0.348499	-0.0396858	-0.394605	2N_1N;3N_1N;4N_1N	biological regulation;biosynthetic process;cellular biosynthetic process;cellular macromolecule biosynthetic process;cellular macromolecule metabolic process;cellular metabolic process;cellular process;cellular protein metabolic process;cytoplasmic translation;macromolecule biosynthetic process;macromolecule metabolic process;metabolic process;positive regulation of catalytic activity;positive re…	cell part;cytosolic large ribosomal subunit;intracellular organelle part;intracellular part;large ribosomal subunit;macromolecular complex;organelle part;ribonucleoprotein complex	680470000000	385920000000	294550000000	1.57534	0.0145303	-0.506093	-3.42791	2.47543	0.00176618	-0.891511	-6.24747	2.92326	0.000112412	-1.12474	-8.22121	6.97403	0.047689	P05318	P05318	60S acidic ribosomal protein P1-alpha	IV	309802	310122
RPP2A	YOL039W	1.16486	0.417719	-0.0219724	-0.0809301	2N_1N;3N_1N;4N_1N	biological regulation;biosynthetic process;cellular biosynthetic process;cellular macromolecule biosynthetic process;cellular macromolecule metabolic process;cellular metabolic process;cellular process;cellular protein metabolic process;cytoplasmic translation;macromolecule biosynthetic process;macromolecule metabolic process;metabolic process;positive regulation of catalytic activity;positive re…	cell part;cytosolic large ribosomal subunit;intracellular organelle part;intracellular part;large ribosomal subunit;macromolecular complex;organelle part;ribonucleoprotein complex	844000000000	472330000000	371670000000	3.04954	0.0019881	-0.413715	-8.87036	4.37729	0	-0.798173	-19.3615	4.59304	0	-0.77272	-21.9432	12.0199	0.157043	P05319	P05319	60S acidic ribosomal protein P2-alpha	XV	254297	254617
HEM2	YGL040C	-1.1877	-0.778921	-0.0884664	-0.0561963	2N_1N;3N_1N;4N_1N	biosynthetic process;cellular aromatic compound metabolic process;cellular biosynthetic process;cellular metabolic process;cellular nitrogen compound biosynthetic process;cellular nitrogen compound metabolic process;cellular process;cofactor biosynthetic process;cofactor metabolic process;heme biosynthetic process;heme metabolic process;heterocycle biosynthetic process;heterocycle metabolic proce…		7163500000	3748900000	3414600000	2.25053	0.00464921	0.721678	7.15757	3.33646	0.000640884	1.4875	16.7804	3.32073	0.000148607	1.61574	16.5772	8.90772	0.0676667	P05373	P05373	Delta-aminolevulinic acid dehydratase	VII	419527	420555
CHO2	YGR157W	-1.55417	-0.630475	-0.118706	0.0545425	2N_1N;3N_1N;4N_1N	alcohol metabolic process;amine metabolic process;biosynthetic process;cellular amine metabolic process;cellular biogenic amine metabolic process;cellular biosynthetic process;cellular lipid metabolic process;cellular metabolic process;cellular nitrogen compound metabolic process;cellular process;ethanolamine-containing compound metabolic process;glycerolipid biosynthetic process;glycerolipid met…	cell part;integral to membrane;intrinsic to membrane;membrane part	32309000000	17239000000	15070000000	4.00592	0	1.28851	15.5979	5.86509	0	1.81353	45.7577	6.68092	0	2.08063	73.2205	16.5519	0.352059	P05374	P05374	Phosphatidylethanolamine N-methyltransferase	VII	802440	805049
SUP35	YDR172W	-0.171361	-0.0153968	0.132944	0.171668	2N_1N;3N_1N;4N_1N	catabolic process;cellular catabolic process;cellular component disassembly;cellular component disassembly at cellular level;cellular component organization;cellular component organization at cellular level;cellular component organization or biogenesis;cellular component organization or biogenesis at cellular level;cellular macromolecular complex disassembly;cellular macromolecular complex subuni…	cell part;cytoplasmic part;cytosol;intracellular non-membrane-bounded organelle;intracellular organelle;intracellular part;macromolecular complex;non-membrane-bounded organelle;organelle;protein complex;ribonucleoprotein complex;RNA granule;stress granule;translation release factor complex	249260000000	143770000000	105490000000	2.56918	0.00272114	0.429817	6.62231	3.54255	0.000783784	0.659817	11.8884	3.94929	0	0.805292	15.0906	10.061	0.0911331	P05453	P05453	Eukaryotic peptide chain release factor GTP-binding subunit	IV	808324	810381
ATP4	YPL078C	-0.955864	-0.680227	-0.238702	-0.185656	2N_1N;3N_1N;4N_1N	ATP biosynthetic process;ATP metabolic process;ATP synthesis coupled proton transport;biosynthetic process;cation transport;cellular biosynthetic process;cellular component assembly;cellular component organization;cellular component organization or biogenesis;cellular metabolic process;cellular nitrogen compound biosynthetic process;cellular nitrogen compound metabolic process;cellular process;en…	cell part;cytoplasmic part;intracellular organelle part;intracellular part;macromolecular complex;membrane part;mitochondrial membrane part;mitochondrial part;mitochondrial proton-transporting ATP synthase. stator stalk;organelle part;protein complex;proton-transporting ATP synthase. stator stalk	76769000000	34463000000	42306000000	3.51553	0.000700565	0.684933	11.7006	4.63291	0	1.14021	22.4561	5.11875	0	1.29536	29.7447	13.2672	0.223155	P05626	P05626	ATP synthase subunit 4. mitochondrial	XVI	408010	408744
MET6	YER091C	-1.18698	-0.165372	-0.142623	0.156954	2N_1N;3N_1N;4N_1N	amine biosynthetic process;amine metabolic process;aspartate family amino acid biosynthetic process;aspartate family amino acid metabolic process;biosynthetic process;carboxylic acid biosynthetic process;carboxylic acid metabolic process;cellular amine metabolic process;cellular amino acid biosynthetic process;cellular amino acid metabolic process;cellular biosynthetic process;cellular ketone met…		1848000000000	979220000000	868810000000	5.26693	0	1.33823	32.4028	5.16392	0	1.43258	30.5311	5.87726	0	1.82411	46.08	16.3081	0.34692	P05694	P05694	5-methyltetrahydropteroyltriglutamate--homocysteine methyltransferase	V	339864	342167
RPL7A	YGL076C	-0.244571	-0.0696857	0.281059	0.118568	2N_1N;3N_1N;4N_1N	biosynthetic process;cellular biosynthetic process;cellular component biogenesis;cellular component biogenesis at cellular level;cellular component organization or biogenesis;cellular component organization or biogenesis at cellular level;cellular macromolecule biosynthetic process;cellular macromolecule metabolic process;cellular metabolic process;cellular nitrogen compound metabolic process;cel…	cell part;cytoplasm;cytosolic large ribosomal subunit;intracellular organelle part;intracellular part;large ribosomal subunit;macromolecular complex;organelle part;ribonucleoprotein complex	906100000000	500470000000	405630000000	2.88953	0.00164532	0.518409	8.05533	4.24331	0	0.956022	17.9111	4.0294	0	0.901719	15.813	11.1622	0.122845	P05737	P05737	60S ribosomal protein L7-A	VII	364335	365996
RPL9A	YGL147C	0.961151	0.199334	0.218869	0.0797817	2N_1N;3N_1N;4N_1N	biosynthetic process;cellular biosynthetic process;cellular macromolecule biosynthetic process;cellular macromolecule metabolic process;cellular metabolic process;cellular process;cellular protein metabolic process;cytoplasmic translation;macromolecule biosynthetic process;macromolecule metabolic process;metabolic process;primary metabolic process;protein metabolic process;translation	cell part;cytosolic large ribosomal subunit;intracellular organelle part;intracellular part;large ribosomal subunit;macromolecular complex;organelle part;ribonucleoprotein complex	995050000000	567260000000	427790000000	2.58865	0.0027804	-0.401839	-6.70253	2.23224	0.00302603	-0.302491	-5.35698	2.41941	0.000374453	-0.353975	-6.0322	7.2403	0.0495244	P05738	P05738	60S ribosomal protein L9-A	VII	227754	228329
RPL6B	YLR448W	0.845569	0.318202	0.135336	-0.0462964	3N_1N;4N_1N	biosynthetic process;cellular biosynthetic process;cellular component assembly;cellular component assembly at cellular level;cellular component organization;cellular component organization at cellular level;cellular component organization or biogenesis;cellular component organization or biogenesis at cellular level;cellular macromolecular complex assembly;cellular macromolecular complex subunit o…	cell part;cytosolic large ribosomal subunit;intracellular organelle part;intracellular part;large ribosomal subunit;macromolecular complex;organelle part;ribonucleoprotein complex	918560000000	514410000000	404150000000	0.948401	0.0670747	-0.153071	-2.02685	1.69638	0.00632472	-0.27572	-3.74009	2.03503	0.00157091	-0.351158	-4.71212	4.67981	0.0477148	P05739	P05739	60S ribosomal protein L6-B	XII	1028854	1029768
RPL17B;RPL17A	YJL177W;YKL180W	1.08028	0.571418	0.108366	-0.122849	3N_1N;4N_1N	biosynthetic process;cellular biosynthetic process;cellular macromolecule biosynthetic process;cellular macromolecule metabolic process;cellular metabolic process;cellular process;cellular protein metabolic process;cytoplasmic translation;macromolecule biosynthetic process;macromolecule metabolic process;metabolic process;primary metabolic process;protein metabolic process;translation	cell part;cytosolic large ribosomal subunit;intracellular organelle part;intracellular part;large ribosomal subunit;macromolecular complex;organelle part;ribonucleoprotein complex	812920000000	465870000000	347050000000	0.154024	0.808135	-0.0671552	-0.412067	1.2958	0.0147908	-0.435041	-2.76469	1.69542	0.00516656	-0.593651	-3.73753	3.14524	0.0959959	P46990;P05740	P46990;P05740	60S ribosomal protein L17-B;60S ribosomal protein L17-A
RPL33A	YPL143W	1.22799	0.292943	-0.0105857	-0.391145	2N_1N;3N_1N;4N_1N	biosynthetic process;cellular biosynthetic process;cellular macromolecule biosynthetic process;cellular macromolecule metabolic process;cellular metabolic process;cellular process;cellular protein metabolic process;cytoplasmic translation;macromolecule biosynthetic process;macromolecule metabolic process;metabolic process;primary metabolic process;protein metabolic process;translation	cell part;cytosolic large ribosomal subunit;intracellular organelle part;intracellular part;large ribosomal subunit;macromolecular complex;organelle part;ribonucleoprotein complex	140090000000	79957000000	60136000000	1.59345	0.0143092	-0.547984	-3.47358	2.13055	0.00334988	-0.787492	-5.01649	2.5049	0.000391583	-1.0128	-6.36329	6.22891	0.0444458	P05744	P05744	60S ribosomal protein L33-A	XVI	282122	282970
RPL36A	YMR194W	1.19427	0.37457	0.128546	-0.275081	2N_1N;3N_1N;4N_1N	biosynthetic process;cellular biosynthetic process;cellular macromolecule biosynthetic process;cellular macromolecule metabolic process;cellular metabolic process;cellular process;cellular protein metabolic process;cytoplasmic translation;macromolecule biosynthetic process;macromolecule metabolic process;metabolic process;primary metabolic process;protein metabolic process;translation	cell part;cytosolic large ribosomal subunit;intracellular organelle part;intracellular part;large ribosomal subunit;macromolecular complex;organelle part;ribonucleoprotein complex	92053000000	52808000000	39245000000	1.6977	0.0123708	-0.608957	-3.74358	2.15172	0.00311183	-0.839705	-5.08592	2.62	0.000420846	-1.10742	-6.83345	6.46942	0.0455021	P05745	P05745	60S ribosomal protein L36-A	XIII	651145	651910
RPL29	YFR032C-A	1.04146	0.243669	-0.122993	-0.371343	2N_1N;3N_1N;4N_1N	biosynthetic process;cellular biosynthetic process;cellular macromolecule biosynthetic process;cellular macromolecule metabolic process;cellular metabolic process;cellular process;cellular protein metabolic process;cytoplasmic translation;macromolecule biosynthetic process;macromolecule metabolic process;metabolic process;primary metabolic process;protein metabolic process;translation	cell part;cytosolic large ribosomal subunit;intracellular organelle part;intracellular part;large ribosomal subunit;macromolecular complex;organelle part;ribonucleoprotein complex	72802000000	40957000000	31846000000	2.31064	0.00350617	-0.417678	-5.63186	2.91167	0.00111735	-0.698793	-8.16385	3.54637	0	-0.871739	-11.9152	8.76868	0.064619	P05747	P05747	60S ribosomal protein L29	VI	223258	223437
RPL15A	YLR029C	0.579404	0.117271	0.198495	0.0511982		biosynthetic process;cellular biosynthetic process;cellular macromolecule biosynthetic process;cellular macromolecule metabolic process;cellular metabolic process;cellular process;cellular protein metabolic process;cytoplasmic translation;macromolecule biosynthetic process;macromolecule metabolic process;metabolic process;primary metabolic process;protein metabolic process;translation	cell part;cytosolic large ribosomal subunit;intracellular organelle part;intracellular part;large ribosomal subunit;macromolecular complex;organelle part;ribonucleoprotein complex	437860000000	252790000000	185070000000	0.884787	0.0805793	-0.232646	-1.89906	0.323018	0.450514	-0.0966773	-0.786957	0.612445	0.115963	-0.185272	-1.36464	1.82025	0.267936	P05748	P05748	60S ribosomal protein L15-A	XII	201976	202590
RPL22A	YLR061W	0.892322	0.321675	-0.0223773	-0.269378	2N_1N;3N_1N;4N_1N	biosynthetic process;cellular biosynthetic process;cellular macromolecule biosynthetic process;cellular macromolecule metabolic process;cellular metabolic process;cellular process;cellular protein metabolic process;cytoplasmic translation;macromolecule biosynthetic process;macromolecule metabolic process;metabolic process;primary metabolic process;protein metabolic process;translation	cell part;cytosolic large ribosomal subunit;intracellular organelle part;intracellular part;large ribosomal subunit;macromolecular complex;organelle part;ribonucleoprotein complex	356190000000	201690000000	154500000000	1.56525	0.0144344	-0.182662	-3.40263	2.87871	0.00122111	-0.48399	-8.00275	3.3459	0.000152139	-0.604758	-10.5843	7.78987	0.0537375	P05749	P05749	60S ribosomal protein L22-A	XII	263194	263948
RPS3	YNL178W	-0.0392139	0.00817075	0.307588	0.061346	3N_1N;4N_1N	biosynthetic process;cellular biosynthetic process;cellular localization;cellular macromolecule biosynthetic process;cellular macromolecule metabolic process;cellular metabolic process;cellular nitrogen compound metabolic process;cellular process;cellular protein metabolic process;cytoplasmic translation;DNA metabolic process;establishment of localization;establishment of localization in cell;est…	cell part;cytosolic small ribosomal subunit;intracellular organelle part;intracellular part;macromolecular complex;organelle part;preribosome;preribosome. small subunit precursor;ribonucleoprotein complex;small ribosomal subunit	572760000000	333520000000	239240000000	0.921694	0.072261	0.306175	1.97299	1.94994	0.00411201	0.641416	4.45289	1.63888	0.00583021	0.515016	3.58971	4.51052	0.0494873	P05750	P05750	40S ribosomal protein S3	XIV	302680	303402
RPS13	YDR064W	0.773044	0.399805	0.233784	-0.190287	4N_1N	biosynthetic process;cellular biosynthetic process;cellular macromolecule biosynthetic process;cellular macromolecule metabolic process;cellular metabolic process;cellular nitrogen compound metabolic process;cellular process;cellular protein metabolic process;cytoplasmic translation;macromolecule biosynthetic process;macromolecule metabolic process;maturation of SSU-rRNA;maturation of SSU-rRNA fr…	cell part;cytosolic small ribosomal subunit;intracellular organelle part;intracellular part;macromolecular complex;organelle part;ribonucleoprotein complex;small ribosomal subunit	225430000000	126710000000	98715000000	0.393368	0.403977	-0.122749	-0.9317	0.840476	0.0568922	-0.245567	-1.81096	1.71237	0.00458574	-0.508238	-3.78259	2.94621	0.110127	P05756	P05756	40S ribosomal protein S13	IV	579458	580452
RPS31	YLR167W	1.03471	0.605343	0.0871236	-0.0900453	3N_1N;4N_1N	biosynthetic process;cellular biosynthetic process;cellular component assembly;cellular component assembly at cellular level;cellular component biogenesis;cellular component biogenesis at cellular level;cellular component organization;cellular component organization at cellular level;cellular component organization or biogenesis;cellular component organization or biogenesis at cellular level;cell…	cell part;cytosolic small ribosomal subunit;intracellular membrane-bounded organelle;intracellular organelle;intracellular organelle part;intracellular part;macromolecular complex;membrane-bounded organelle;nucleus;organelle;organelle part;ribonucleoprotein complex;small ribosomal subunit	777020000000	455910000000	321110000000	0.637057	0.172414	-0.136164	-1.41258	3.6917	0	-0.526175	-12.9782	3.60431	0	-0.632788	-12.3286	7.93307	0.0550837	P05759;P0CG63	P05759	Ubiquitin-40S ribosomal protein S31;Ubiquitin;40S ribosomal protein S31	XII	498947	499405
CDC36	YDL165W	NaN	-0.821072	-0.122363	NaN		biological regulation;biosynthetic process;catabolic process;cellular biosynthetic process;cellular catabolic process;cellular macromolecule catabolic process;cellular macromolecule metabolic process;cellular metabolic process;cellular nitrogen compound metabolic process;cellular process;cellular process involved in reproduction;cellular protein metabolic process;cellular response to chemical sti…	CCR4-NOT core complex;cell part;cytoplasm;intracellular membrane-bounded organelle;intracellular organelle;intracellular organelle part;intracellular part;macromolecular complex;membrane-bounded organelle;nuclear part;nucleoplasm part;nucleus;organelle;organelle part;protein complex	1154100000	605010000	549110000	0	0.956934	NaN	0	0	0.950288	NaN	0	NaN	1	0	NaN	NaN	0.375238	P06100	P06100	General negative regulator of transcription subunit 2	IV	164290	164865
CDC37	YDR168W	0.473192	0.204589	-0.0730406	0.0499081		biological regulation;cell cycle process;cell division;cellular component assembly;cellular component assembly at cellular level;cellular component organization;cellular component organization at cellular level;cellular component organization or biogenesis;cellular component organization or biogenesis at cellular level;cellular process;cellular response to stimulus;intracellular protein kinase ca…	cell part;cytoplasm;intracellular part	106850000000	52310000000	54537000000	0.386096	0.412988	0.0894577	0.916935	0.563485	0.156423	-0.127382	-1.26911	0.408467	0.282237	0.0981153	0.962238	1.35805	0.410442	P06101	P06101	Hsp90 co-chaperone Cdc37	IV	790328	791848
NOT3	YIL038C	0.314547	0.078778	-0.050184	0.147833	2N_1N;4N_1N	biological regulation;biosynthetic process;catabolic process;cellular biosynthetic process;cellular catabolic process;cellular macromolecule biosynthetic process;cellular macromolecule catabolic process;cellular macromolecule metabolic process;cellular metabolic process;cellular nitrogen compound metabolic process;cellular process;cellular protein metabolic process;macromolecule biosynthetic proc…	CCR4-NOT core complex;cell part;cytoplasm;intracellular membrane-bounded organelle;intracellular organelle;intracellular organelle part;intracellular part;macromolecular complex;membrane-bounded organelle;nuclear part;nucleoplasm part;nucleus;organelle;organelle part;protein complex	29368000000	15838000000	13530000000	1.36669	0.022455	0.142682	2.92602	0.660265	0.110376	0.080132	1.45778	2.00271	0.00155396	0.356873	4.61239	4.02967	0.0576406	P06102	P06102	General negative regulator of transcription subunit 3	IX	280142	282652
PRT1	YOR361C	-0.447605	-0.0690602	0.289663	0.328383	2N_1N;3N_1N;4N_1N	biological regulation;cellular component assembly;cellular component assembly at cellular level;cellular component organization;cellular component organization at cellular level;cellular component organization or biogenesis;cellular component organization or biogenesis at cellular level;cellular macromolecular complex assembly;cellular macromolecular complex subunit organization;cellular process;…	cell part;cytoplasm;cytoplasmic part;eukaryotic 43S preinitiation complex;eukaryotic 48S preinitiation complex;eukaryotic translation initiation factor 3 complex;intracellular non-membrane-bounded organelle;intracellular organelle;intracellular part;macromolecular complex;multi-eIF complex;non-membrane-bounded organelle;organelle;protein complex;ribonucleoprotein complex;RNA granule;stress granul…	144050000000	85868000000	58182000000	2.5966	0.00261765	0.684768	6.7355	3.39255	0.000677043	1.10532	10.8807	3.6339	0	1.25186	12.545	9.62305	0.0801797	P06103	P06103	Eukaryotic translation initiation factor 3 subunit B	XV	1015361	1017652
SCP160	YJL080C	0.0528497	0.268436	0.137913	-0.211831	2N_1N;3N_1N;4N_1N	biological regulation;cell cycle process;cell surface receptor linked signaling pathway;cellular component organization;cellular component organization at cellular level;cellular component organization or biogenesis;cellular component organization or biogenesis at cellular level;cellular localization;cellular macromolecule localization;cellular process;cellular process involved in reproduction;ce…	cell part;cytoplasm;cytoplasmic part;endoplasmic reticulum;endoplasmic reticulum membrane;endoplasmic reticulum part;intracellular membrane-bounded organelle;intracellular organelle;intracellular organelle part;intracellular part;macromolecular complex;membrane;membrane part;membrane-bounded organelle;nuclear membrane;nuclear outer membrane-endoplasmic reticulum membrane network;nuclear part;orga…	755900000000	419040000000	336860000000	4.09111	0	0.556149	16.3923	3.66125	0	0.492506	12.7482	2.3049	0.000440427	0.220648	5.61137	10.0573	0.0909602	P06105	P06105	Protein SCP160	X	285558	289226
MET17	YLR303W	-0.538143	-0.279859	0.364042	0.530437	2N_1N;3N_1N;4N_1N	amine biosynthetic process;amine metabolic process;aspartate family amino acid biosynthetic process;aspartate family amino acid metabolic process;biosynthetic process;carboxylic acid biosynthetic process;carboxylic acid metabolic process;cellular amine metabolic process;cellular amino acid biosynthetic process;cellular amino acid metabolic process;cellular biosynthetic process;cellular ketone met…	cell part;cytoplasm;intracellular part	299140000000	176450000000	122700000000	2.99734	0.0018764	0.597511	8.59652	4.11976	0	1.29758	16.6682	4.60276	0	1.6118	22.0672	11.7199	0.142979	P06106	P06106	Protein MET17;O-acetylhomoserine sulfhydrylase;O-acetylserine sulfhydrylase	XII	732542	733876
CTT1	YGR088W	-0.277814	-0.551176	-0.537747	-1.71198	4N_1N	catabolic process;cellular catabolic process;cellular metabolic process;cellular process;cellular response to abiotic stimulus;cellular response to chemical stimulus;cellular response to hydrogen peroxide;cellular response to osmotic stress;cellular response to oxidative stress;cellular response to reactive oxygen species;cellular response to salt stress;cellular response to stimulus;cellular res…	cell part;cytoplasm;intracellular part	37590000000	19092000000	18498000000	0.185444	0.755446	0.0729702	0.485888	0.376177	0.346997	0.127351	0.896728	2.59114	0.000412729	-0.935573	-6.71284	3.15276	0.0954234	P06115	P06115	Catalase T	VII	654634	656322
ILV5	YLR355C	-0.197722	0.298906	0.68846	0.640076	2N_1N;3N_1N;4N_1N	amine biosynthetic process;amine metabolic process;biosynthetic process;branched chain family amino acid biosynthetic process;branched chain family amino acid metabolic process;carboxylic acid biosynthetic process;carboxylic acid metabolic process;cellular amine metabolic process;cellular amino acid biosynthetic process;cellular amino acid metabolic process;cellular biosynthetic process;cellular …	cell part;cytoplasmic part;intracellular membrane-bounded organelle;intracellular non-membrane-bounded organelle;intracellular organelle;intracellular organelle part;intracellular part;membrane-bounded organelle;mitochondrial nucleoid;mitochondrial part;mitochondrion;non-membrane-bounded organelle;nucleoid;organelle;organelle part	740690000000	450950000000	289740000000	2.42878	0.00322481	0.741814	6.06778	3.32851	0.000636197	1.20431	10.4757	3.44564	0.000167247	1.2502	11.2277	9.20293	0.0724963	P06168	P06168	Ketol-acid reductoisomerase. mitochondrial	XII	838066	839253
PDC1	YLR044C	-1.03119	-0.425654	0.0255178	0.0541164	2N_1N;3N_1N;4N_1N	alcohol biosynthetic process;alcohol catabolic process;alcohol metabolic process;amine catabolic process;amine metabolic process;amino acid catabolic process to alcohol via Ehrlich pathway;amino acid catabolic process via Ehrlich pathway;aromatic amino acid family catabolic process;aromatic amino acid family catabolic process to alcohol via Ehrlich pathway;aromatic amino acid family metabolic pro…	cell part;cytoplasmic part;cytosol;intracellular membrane-bounded organelle;intracellular organelle;intracellular part;membrane-bounded organelle;nucleus;organelle	6226000000000	3248400000000	2977600000000	2.69422	0.00196813	0.856271	7.15232	3.4257	0.000697395	1.34473	11.0962	3.62649	0	1.49876	12.4904	9.7464	0.0835278	P06169	P06169	Pyruvate decarboxylase isozyme 1	XII	232390	234081
HEM4	YOR278W	NaN	-0.21224	0.0592593	NaN		biosynthetic process;cellular aromatic compound metabolic process;cellular biosynthetic process;cellular metabolic process;cellular nitrogen compound biosynthetic process;cellular nitrogen compound metabolic process;cellular process;cofactor biosynthetic process;cofactor metabolic process;heme biosynthetic process;heme metabolic process;heterocycle biosynthetic process;heterocycle metabolic proce…		1244900000	643180000	601710000	0	0.957277	NaN	0	0	0.950619	NaN	0	NaN	1	0	NaN	NaN	0.379277	P06174	P06174	Uroporphyrinogen-III synthase	XV	842817	843644
CYC3	YAL039C	-0.424771	-0.0179918	-0.25637	-0.386444	2N_1N;3N_1N;4N_1N	cellular component assembly;cellular component assembly at cellular level;cellular component organization;cellular component organization at cellular level;cellular component organization or biogenesis;cellular component organization or biogenesis at cellular level;cellular macromolecular complex assembly;cellular macromolecular complex subunit organization;cellular macromolecule metabolic proces…	cell part;cytoplasmic part;intracellular organelle part;intracellular part;membrane;membrane-enclosed lumen;mitochondrial inner membrane;mitochondrial intermembrane space;mitochondrial membrane;mitochondrial part;organelle envelope lumen;organelle inner membrane;organelle membrane;organelle part	5731900000	3147800000	2584100000	2.34819	0.00364103	0.714758	5.76752	2.00619	0.00377393	0.622728	4.62306	2.22094	0.000609524	0.566089	5.31827	6.57533	0.0458736	P06182	P06182	Cytochrome c heme lyase	I	68716	69525
PIS1	YPR113W	-0.509419	-1.1243	-0.0619203	0.0281225		biosynthetic process;cellular biosynthetic process;cellular lipid metabolic process;cellular metabolic process;cellular process;glycerolipid biosynthetic process;glycerolipid metabolic process;glycerophospholipid biosynthetic process;glycerophospholipid metabolic process;lipid biosynthetic process;lipid metabolic process;metabolic process;organophosphate metabolic process;phosphatidylinositol bio…	cell part;cytoplasmic part;endoplasmic reticulum membrane;endoplasmic reticulum part;Golgi apparatus;integral to membrane;intracellular membrane-bounded organelle;intracellular organelle;intracellular organelle part;intracellular part;intrinsic to membrane;membrane;membrane part;membrane-bounded organelle;mitochondrial membrane;mitochondrial outer membrane;mitochondrial part;organelle;organelle m…	1929000000	1009300000	919690000	0	0.957623	-0.334774	0	0	0.945755	0.826841	0	0	1	1.03193	0	0	1	P06197	P06197	CDP-diacylglycerol--inositol 3-phosphatidyltransferase	XVI	752257	752919
LEU4	YNL104C	-0.277642	0.390759	0.895429	0.96056	2N_1N;3N_1N;4N_1N	amine biosynthetic process;amine metabolic process;biosynthetic process;branched chain family amino acid biosynthetic process;branched chain family amino acid metabolic process;carboxylic acid biosynthetic process;carboxylic acid metabolic process;cellular amine metabolic process;cellular amino acid biosynthetic process;cellular amino acid metabolic process;cellular biosynthetic process;cellular …	cell part;cytoplasm;cytoplasmic part;intracellular membrane-bounded organelle;intracellular organelle;intracellular part;membrane-bounded organelle;mitochondrion;organelle	40804000000	27569000000	13235000000	2.84882	0.0015792	0.895388	7.85908	3.94842	0	1.54113	15.083	4.11712	0	1.67095	16.6427	10.9144	0.114408	P06208	P06208	2-isopropylmalate synthase	XIV	424895	426754
CDC7	YDL017W	NaN	0.0540385	0.340451	0.00264753		biological regulation;biosynthetic process;cell cycle phase;cell cycle process;cell division;cellular biosynthetic process;cellular component organization;cellular component organization at cellular level;cellular component organization or biogenesis;cellular component organization or biogenesis at cellular level;cellular macromolecule biosynthetic process;cellular macromolecule metabolic process…	cell part;chromosomal part;chromosome. centromeric region;Dbf4-dependent protein kinase complex;intracellular membrane-bounded organelle;intracellular organelle;intracellular organelle part;intracellular part;macromolecular complex;membrane-bounded organelle;nucleus;organelle;organelle part;protein complex	5697900000	3585000000	2112900000	0	0.959338	NaN	0	0	0.94609	NaN	0	0	1	NaN	0	0	1	P06243	P06243	Cell division control protein 7	IV	424209	425732
TPK1	YJL164C	-0.572265	-0.218458	-0.451653	-0.476404	2N_1N;3N_1N;4N_1N	biological regulation;cell cycle;cell division;cellular macromolecule metabolic process;cellular metabolic process;cellular process;cellular protein metabolic process;cellular response to stimulus;intracellular protein kinase cascade;intracellular signal transduction;macromolecule metabolic process;macromolecule modification;metabolic process;phosphate-containing compound metabolic process;phosph…	cAMP-dependent protein kinase complex;cell part;cytoplasm;intracellular membrane-bounded organelle;intracellular organelle;intracellular part;macromolecular complex;membrane-bounded organelle;nucleus;organelle;protein complex	6445000000	3086100000	3358900000	1.98233	0.00728151	0.883956	4.5503	1.95066	0.00411504	0.612383	4.45503	1.20896	0.0181006	0.506342	2.57262	5.14195	0.0445995	P06244	P06244	cAMP-dependent protein kinase type 1	X	109966	111159
RPS14A	YCR031C	1.02557	0.423957	0.0857407	-0.265482	2N_1N;3N_1N;4N_1N	biosynthetic process;cellular biosynthetic process;cellular component assembly;cellular component assembly at cellular level;cellular component organization;cellular component organization at cellular level;cellular component organization or biogenesis;cellular component organization or biogenesis at cellular level;cellular macromolecular complex assembly;cellular macromolecular complex subunit o…	cell part;cytosolic small ribosomal subunit;intracellular non-membrane-bounded organelle;intracellular organelle;intracellular organelle part;intracellular part;macromolecular complex;non-membrane-bounded organelle;nuclear part;nucleolus;organelle;organelle part;preribosome;ribonucleoprotein complex;small ribosomal subunit;small-subunit processome	639200000000	367820000000	271380000000	4.09492	0	-0.274787	-16.4288	4.72901	0	-0.556255	-23.7417	5.79625	0	-0.803312	-43.977	14.6202	0.30081	P06367	P06367	40S ribosomal protein S14-A	III	177500	178220
DED1	YOR204W	-0.575619	-0.0142274	0.2374	0.157281	2N_1N;3N_1N;4N_1N	cellular component disassembly;cellular component disassembly at cellular level;cellular component organization;cellular component organization at cellular level;cellular component organization or biogenesis;cellular component organization or biogenesis at cellular level;cellular macromolecular complex disassembly;cellular macromolecular complex subunit organization;cellular process;macromolecula…	cell part;cytoplasm;intracellular membrane-bounded organelle;intracellular organelle;intracellular part;membrane-bounded organelle;nucleus;organelle	251620000000	143750000000	107860000000	3.33691	0.00106897	0.847102	10.528	3.763	0	1.145	13.5325	3.78749	0	1.17195	13.728	10.8874	0.111991	P06634	P06634	ATP-dependent RNA helicase DED1	XV	722911	724725
SIR2	YDL042C	0.232451	0.266745	0.447951	-0.0509719	2N_1N;3N_1N	aging;biological regulation;biosynthetic process;cell aging;cellular biosynthetic process;cellular component organization;cellular component organization at cellular level;cellular component organization or biogenesis;cellular component organization or biogenesis at cellular level;cellular macromolecule biosynthetic process;cellular macromolecule metabolic process;cellular metabolic process;cellu…	cell part;chromatin;chromatin remodeling complex;chromatin silencing complex;chromosomal part;chromosome. telomeric region;heterochromatin;intracellular non-membrane-bounded organelle;intracellular organelle;intracellular organelle part;intracellular part;macromolecular complex;non-membrane-bounded organelle;nuclear chromatin;nuclear chromosome part;nuclear chromosome. telomeric region;nuclear he…	4804200000	2721100000	2083100000	1.1708	0.0379867	0.327801	2.49001	1.73504	0.00603085	0.541639	3.84339	0.196644	0.752633	0.118003	0.511642	3.10248	0.0987526	P06700	P06700	NAD-dependent histone deacetylase SIR2	IV	376757	378445
CDC31	YOR257W	1.12943	0.0917283	-0.457155	-0.385884	2N_1N;3N_1N;4N_1N	biological regulation;catabolic process;cell cycle phase;cell cycle process;cell division;cellular catabolic process;cellular component assembly;cellular component assembly at cellular level;cellular component organization;cellular component organization at cellular level;cellular component organization or biogenesis;cellular component organization or biogenesis at cellular level;cellular macromo…	cell part;cytoplasmic part;cytoskeletal part;half bridge of spindle pole body;intracellular organelle part;intracellular part;macromolecular complex;membrane part;microtubule organizing center part;nuclear part;nuclear pore;organelle part;pore complex;protein complex;transcription export complex 2	10706000000	5864100000	4841500000	1.29462	0.0275524	-0.538853	-2.76204	2.04298	0.00329862	-1.00601	-4.73693	1.94766	0.00197333	-0.869505	-4.44608	5.28526	0.0441466	P06704	P06704	Cell division control protein 31	XV	811008	811493
GPH1	YPR160W	-1.67422	-1.37083	-0.9883	-0.841722	2N_1N;3N_1N;4N_1N	carbohydrate catabolic process;carbohydrate metabolic process;catabolic process;cellular carbohydrate catabolic process;cellular carbohydrate metabolic process;cellular glucan metabolic process;cellular macromolecule metabolic process;cellular metabolic process;cellular polysaccharide catabolic process;cellular polysaccharide metabolic process;cellular process;energy derivation by oxidation of or…	cell part;cytoplasm;intracellular part	42869000000	15197000000	27672000000	1.80859	0.0100704	0.552532	4.04508	3.02047	0.000945148	1.05386	8.71691	3.41178	0.000161889	1.29984	11.0052	8.24084	0.0586083	P06738	P06738	Glycogen phosphorylase	XVI	861306	864014
HAP2	YGL237C	0.653784	0.454131	-0.451953	-0.349719		biological regulation;biosynthetic process;carbon catabolite activation of transcription from RNA polymerase II promoter;carbon catabolite regulation of transcription;carbon catabolite regulation of transcription from RNA polymerase II promoter;cell communication;cellular biosynthetic process;cellular macromolecule biosynthetic process;cellular macromolecule metabolic process;cellular metabolic p…	CCAAT-binding factor complex;cell part;intracellular organelle part;intracellular part;macromolecular complex;nuclear part;nucleoplasm part;organelle part;protein complex;transcription factor complex	2629500000	1429700000	1199900000	0	0.960695	0.135864	0	0	0.946429	-0.683008	0	0	1	-0.50911	0	0	1	P06774	P06774	Transcriptional activator HAP2	VII	52731	53528
PDE2	YOR360C	-1.25838	NaN	0.345755	0.263725		biological regulation;cAMP-mediated signaling;cellular process;cellular response to stimulus;cyclic-nucleotide-mediated signaling;intracellular signal transduction;metabolic process;regulation of biological process;regulation of cellular process;response to stimulus;second-messenger-mediated signaling;signal transduction		1630400000	945000000	685410000	0	0.960361	NaN	0	0	0.945439	1.98611	0	0	1	1.98742	0	0	1	P06776	P06776	3.5-cyclic-nucleotide phosphodiesterase 2	XV	1013241	1014821
RAD52	YML032C	0.554471	0.310774	-0.437449	-0.341237	3N_1N;4N_1N	anatomical structure homeostasis;biological regulation;biosynthetic process;cell cycle process;cellular biosynthetic process;cellular component assembly;cellular component assembly at cellular level;cellular component organization;cellular component organization at cellular level;cellular component organization or biogenesis;cellular component organization or biogenesis at cellular level;cellular…	cell part;chromosome;intracellular membrane-bounded organelle;intracellular non-membrane-bounded organelle;intracellular organelle;intracellular organelle part;intracellular part;membrane-bounded organelle;non-membrane-bounded organelle;nuclear chromosome;nuclear part;nucleus;organelle;organelle part	3243700000	1698600000	1545100000	0.0302337	0.975841	-0.0118694	-0.0898143	1.02593	0.0324968	-0.81075	-2.18512	1.53883	0.00781546	-0.454689	-3.33693	2.59499	0.140791	P06778	P06778	DNA repair and recombination protein RAD52	XIII	212515	213930
RHO1	YPR165W	-0.234792	-0.176681	-0.098893	0.0406609	3N_1N;4N_1N	actin cytoskeleton organization;actin cytoskeleton reorganization;actin filament-based process;biological regulation;budding cell bud growth;cellular component organization;cellular component organization at cellular level;cellular component organization or biogenesis;cellular component organization or biogenesis at cellular level;cellular process;cellular response to stimulus;cytoskeleton organi…	1.3-beta-D-glucan synthase complex;cell part;cell projection part;cellular bud neck;cellular bud tip;cytoplasmic part;endosomal part;endosome membrane;Golgi apparatus;incipient cellular bud site;intracellular membrane-bounded organelle;intracellular organelle;intracellular organelle part;intracellular part;macromolecular complex;mating projection tip;membrane;membrane part;membrane-bounded organe…	3623900000	1754700000	1869200000	0.964193	0.0638149	0.602347	2.05885	0.909176	0.0460449	0.786422	2.12786	1.18136	0.0194283	1.02213	2.83601	3.05473	0.102079	P06780	P06780	GTP-binding protein RHO1	XVI	875368	875997
RHO2	YNL090W	-0.74327	-0.462509	-0.0484617	0.00492478	2N_1N;3N_1N;4N_1N	actin cytoskeleton organization;actin filament organization;actin filament-based process;biological regulation;cell wall organization;cell wall organization or biogenesis;cellular cell wall organization;cellular cell wall organization or biogenesis;cellular component organization;cellular component organization at cellular level;cellular component organization or biogenesis;cellular component org…	cell part;intracellular;membrane;plasma membrane	4873600000	2680200000	2193400000	2.11866	0.00583431	0.624108	4.97779	2.8155	0.00142754	1.04751	7.70174	2.56376	0.000405687	1.16266	6.60014	7.49793	0.0512217	P06781	P06781	GTP-binding protein RHO2	XIV	456565	457143
SNF1	YDR477W	-0.88829	-0.407362	-0.194221	-0.019121	2N_1N;3N_1N;4N_1N	aging;biological adhesion;biological regulation;carbohydrate metabolic process;cell adhesion;cell aging;cell communication;cell growth;cell wall assembly;cellular component assembly;cellular component assembly at cellular level;cellular component organization;cellular component organization at cellular level;cellular component organization or biogenesis;cellular component organization or biogenes…	AMP-activated protein kinase complex;cell part;cytoplasm;cytoplasmic part;fungal-type vacuole;intracellular membrane-bounded organelle;intracellular organelle;intracellular organelle part;intracellular part;lytic vacuole;macromolecular complex;membrane;membrane-bounded organelle;membrane-enclosed lumen;nuclear envelope lumen;nuclear membrane;nuclear part;nucleus;organelle;organelle envelope lumen…	24792000000	12387000000	12405000000	1.5508	0.0145502	0.755731	3.3666	2.40579	0.00241791	1.11691	5.98081	2.76585	0.00010148	1.40199	7.47243	6.72243	0.0464788	P06782	P06782	Carbon catabolite-derepressing protein kinase	IV	1412373	1414274
CDC21	YOR074C	-0.572545	-0.179118	-0.0606063	0.0310693	2N_1N;3N_1N;4N_1N	2'-deoxyribonucleotide biosynthetic process;2'-deoxyribonucleotide metabolic process;biosynthetic process;cellular biosynthetic process;cellular metabolic process;cellular nitrogen compound biosynthetic process;cellular nitrogen compound metabolic process;cellular process;deoxyribonucleoside monophosphate biosynthetic process;deoxyribonucleoside monophosphate metabolic process;deoxyribonucleoside…	cell part;intracellular organelle part;intracellular part;nuclear part;nuclear periphery;organelle part	19120000000	10803000000	8316700000	2.58997	0.00278545	0.775882	6.70798	2.98464	0.000908108	1.02007	8.53113	3.32053	0.000148377	1.17574	10.4262	8.89515	0.067595	P06785	P06785	Thymidylate synthase	XV	466675	467589
TOP2	YNL088W	0.134995	0.0124013	0.233816	0.109085	3N_1N;4N_1N	biological regulation;cell cycle process;cellular component organization;cellular component organization at cellular level;cellular component organization or biogenesis;cellular component organization or biogenesis at cellular level;cellular macromolecule metabolic process;cellular metabolic process;cellular nitrogen compound metabolic process;cellular process;chromatin assembly or disassembly;ch…	cell part;chromosomal part;DNA replication termination region;intracellular membrane-bounded organelle;intracellular organelle;intracellular organelle part;intracellular part;membrane-bounded organelle;nuclear chromosome part;nuclear part;nucleus;organelle;organelle part;synaptonemal complex	49047000000	27106000000	21941000000	0.62244	0.180615	0.289237	1.38411	1.31022	0.0144381	0.563427	2.79716	1.3128	0.0136147	0.562959	2.80298	3.24545	0.0898839	P06786	P06786	DNA topoisomerase 2	XIV	457704	461990
CMD1	YBR109C	1.01066	0.255654	-0.215748	-0.0401812	2N_1N;3N_1N;4N_1N	asexual reproduction;autophagy;biosynthetic process;catabolic process;cell budding;cell cycle process;cell division;cellular biosynthetic process;cellular catabolic process;cellular component organization;cellular component organization at cellular level;cellular component organization or biogenesis;cellular component organization or biogenesis at cellular level;cellular lipid metabolic process;c…	cell part;cell projection part;cellular bud neck;cellular bud tip;central plaque of spindle pole body;cytoplasmic part;cytoskeletal part;incipient cellular bud site;intracellular organelle part;intracellular part;mating projection tip;microtubule organizing center part;organelle part;site of polarized growth	135740000000	73533000000	62207000000	1.53557	0.0151165	-0.423594	-3.32887	2.60865	0.00158743	-0.846839	-6.7858	1.90032	0.00246409	-0.549434	-4.3066	6.04454	0.0438229	P06787	P06787	Calmodulin	II	457919	458362
RAD3	YER171W	NaN	-0.077578	0.213645	-0.0161678		biological regulation;biosynthetic process;cellular biosynthetic process;cellular macromolecule biosynthetic process;cellular macromolecule metabolic process;cellular metabolic process;cellular nitrogen compound metabolic process;cellular process;cellular protein metabolic process;DNA conformation change;DNA duplex unwinding;DNA geometric change;DNA metabolic process;macromolecule biosynthetic pr…	carboxy-terminal domain protein kinase complex;cell part;core TFIIH complex;cytoplasmic part;cytosol;holo TFIIH complex;intracellular organelle part;intracellular part;macromolecular complex;nuclear part;nucleoplasm part;nucleotide-excision repair complex;nucleotide-excision repair factor 3 complex;organelle part;protein complex;transcription factor complex	1466800000	877970000	588820000	0	0.95968	NaN	0	0	0.945096	NaN	0	0	1	NaN	0	0	1	P06839	P06839	DNA repair helicase RAD3	V	527082	529418
SPT2	YER161C	0.880055	0.171793	-0.248314	-0.442622	4N_1N	biological regulation;biosynthetic process;cellular biosynthetic process;cellular component organization;cellular component organization at cellular level;cellular component organization or biogenesis;cellular component organization or biogenesis at cellular level;cellular macromolecule metabolic process;cellular metabolic process;cellular nitrogen compound metabolic process;cellular process;chro…	cell part;cytoplasmic part;cytosol;intracellular membrane-bounded organelle;intracellular organelle;intracellular part;membrane-bounded organelle;nucleus;organelle	4704800000	2627600000	2077200000	0.669247	0.155238	-0.940661	-1.47528	0.874226	0.0512698	-1.17272	-1.878	0.963221	0.0337499	-1.29655	-2.05687	2.50669	0.150078	P06843	P06843	Protein SPT2	V	499347	500348
CYT1	YOR065W	-0.999754	-1.11681	-0.664226	-0.168808	3N_1N;4N_1N	cellular metabolic process;cellular process;electron transport chain;generation of precursor metabolites and energy;metabolic process;mitochondrial electron transport. ubiquinol to cytochrome c;oxidation-reduction process;oxidative phosphorylation;phosphate-containing compound metabolic process;phosphorus metabolic process;phosphorylation;respiratory electron transport chain	cell part;cytoplasmic part;cytosol;intracellular organelle part;intracellular part;macromolecular complex;membrane;membrane part;membrane-enclosed lumen;mitochondrial inner membrane;mitochondrial intermembrane space;mitochondrial membrane;mitochondrial membrane part;mitochondrial part;mitochondrial respiratory chain;mitochondrial respiratory chain complex III;organelle envelope lumen;organelle in…	2878200000	1317900000	1560300000	0	0.960025	0.543748	0	0.884941	0.0492466	1.05905	2.06926	1.86128	0.00296809	1.63386	4.19389	2.74622	0.126581	P07143	P07143	Cytochrome c1. heme protein. mitochondrial	XV	447439	448368
FAS1	YKL182W	-1.21718	-0.322994	0.0948918	-0.30445	2N_1N;3N_1N;4N_1N	biosynthetic process;carboxylic acid biosynthetic process;carboxylic acid metabolic process;cellular biosynthetic process;cellular ketone metabolic process;cellular lipid metabolic process;cellular metabolic process;cellular process;fatty acid biosynthetic process;fatty acid metabolic process;lipid biosynthetic process;lipid metabolic process;long-chain fatty acid biosynthetic process;long-chain …	cell part;cytoplasmic part;cytosol;cytosolic part;fatty acid synthase complex;intracellular part;lipid particle;macromolecular complex;protein complex	924730000000	469100000000	455640000000	4.46328	0	1.18791	20.3525	5.68416	0	1.71041	41.2242	5.16262	0	1.40345	30.5082	15.3101	0.321135	P07149	P07149	Fatty acid synthase subunit beta;3-hydroxyacyl-[acyl-carrier-protein] dehydratase;Enoyl-[acyl-carrier-protein] reductase [NADH];[Acyl-carrier-protein] acetyltransferase;[Acyl-carrier-protein] malonyltransferase;S-acyl fatty acid synthase thioesterase	XI	100671	106826
ADK1	YDR226W	0.755763	0.316239	-0.180012	-0.282931	3N_1N;4N_1N	ADP biosynthetic process;ADP metabolic process;AMP metabolic process;ATP metabolic process;biosynthetic process;cellular biosynthetic process;cellular macromolecule metabolic process;cellular metabolic process;cellular nitrogen compound biosynthetic process;cellular nitrogen compound metabolic process;cellular process;DNA metabolic process;DNA-dependent DNA replication initiation;heterocycle bios…	cell part;cytoplasm;cytoplasmic part;cytosol;intracellular organelle part;intracellular part;membrane;membrane-enclosed lumen;mitochondrial inner membrane;mitochondrial intermembrane space;mitochondrial membrane;mitochondrial part;organelle envelope lumen;organelle inner membrane;organelle membrane;organelle part	403170000000	222540000000	180640000000	0.968126	0.0632848	-0.17451	-2.06684	2.77444	0.00140732	-0.604964	-7.51165	2.68336	0.00030581	-0.592754	-7.10487	6.42592	0.0452787	P07170	P07170	Adenylate kinase	IV	916486	917154
HIS5	YIL116W	-0.450958	-1.11517	-0.0911717	-0.329506	3N_1N;4N_1N	amine biosynthetic process;amine metabolic process;biosynthetic process;carboxylic acid biosynthetic process;carboxylic acid metabolic process;cellular amine metabolic process;cellular amino acid biosynthetic process;cellular amino acid metabolic process;cellular biosynthetic process;cellular ketone metabolic process;cellular metabolic process;cellular nitrogen compound biosynthetic process;cellu…		13693000000	7123400000	6569600000	0.186512	0.753904	-0.180805	-0.488356	1.87335	0.00448822	0.822639	4.2285	1.57947	0.0067162	0.66565	3.4383	3.63933	0.06993	P07172	P07172	Histidinol-phosphate aminotransferase	IX	142928	144085
TOM70	YNL121C	-0.250355	0.00658763	0.0150903	-0.109871	2N_1N;3N_1N;4N_1N	cellular component organization;cellular component organization at cellular level;cellular component organization or biogenesis;cellular component organization or biogenesis at cellular level;cellular membrane organization;cellular process;establishment of localization;establishment of localization in cell;establishment of protein localization;establishment of protein localization in mitochondrio…	cell part;cytoplasmic part;integral to membrane;integral to mitochondrial membrane;integral to mitochondrial outer membrane;integral to organelle membrane;intracellular membrane-bounded organelle;intracellular organelle;intracellular organelle part;intracellular part;intrinsic to membrane;intrinsic to mitochondrial outer membrane;intrinsic to organelle membrane;macromolecular complex;membrane;mem…	260600000000	139310000000	121290000000	3.43609	0.000596154	0.598499	11.1645	3.64789	0	0.655995	12.6485	3.69571	0	0.645206	13.0088	10.7797	0.108692	P07213	P07213	Mitochondrial import receptor subunit TOM70	XIV	398684	400537
MST1	YKL194C	-0.422678	0.0185042	0.18662	-0.454223	2N_1N;3N_1N;4N_1N	amine metabolic process;amino acid activation;carboxylic acid metabolic process;cellular amine metabolic process;cellular amino acid metabolic process;cellular ketone metabolic process;cellular macromolecule metabolic process;cellular metabolic process;cellular nitrogen compound metabolic process;cellular process;macromolecule metabolic process;metabolic process;mitochondrial RNA metabolic proces…	cell part;cytoplasmic part;intracellular membrane-bounded organelle;intracellular organelle;intracellular organelle lumen;intracellular organelle part;intracellular part;membrane-bounded organelle;membrane-enclosed lumen;mitochondrial matrix;mitochondrial part;mitochondrion;organelle;organelle lumen;organelle part	10011000000	4438900000	5572500000	1.44519	0.0184787	0.613073	3.10987	2.99998	0.00092562	1.02086	8.6102	1.17675	0.0197084	0.454676	2.82314	5.62192	0.0437128	P07236	P07236	Threonine--tRNA ligase. mitochondrial	XI	77258	78646
ADE5.7	YGL234W	-1.39802	-0.484629	-0.855798	-0.830723	2N_1N;3N_1N;4N_1N	biosynthetic process;cellular aromatic compound metabolic process;cellular biosynthetic process;cellular metabolic process;cellular nitrogen compound biosynthetic process;cellular nitrogen compound metabolic process;cellular process;'de novo' IMP biosynthetic process;heterocycle biosynthetic process;heterocycle metabolic process;IMP biosynthetic process;IMP metabolic process;metabolic process;nit…	cell part;cytoplasm;intracellular part	221240000000	91624000000	129620000000	3.15658	0.00114094	1.31214	9.45708	3.00311	0.000929461	1.06867	8.62642	3.06266	0.000122605	1.16557	8.9404	9.22234	0.0733676	P07244	P07244	Bifunctional purine biosynthetic protein ADE5.7;Phosphoribosylamine--glycine ligase;Phosphoribosylformylglycinamidine cyclo-ligase	VII	56482	58890
ADE3	YGR204W	-0.865291	-0.24018	-0.20651	-0.220032	2N_1N;3N_1N;4N_1N	amine biosynthetic process;amine metabolic process;aromatic compound biosynthetic process;aspartate family amino acid biosynthetic process;aspartate family amino acid metabolic process;biosynthetic process;carboxylic acid biosynthetic process;carboxylic acid metabolic process;cellular amine metabolic process;cellular amino acid biosynthetic process;cellular amino acid metabolic process;cellular a…	cell part;cytoplasm;intracellular membrane-bounded organelle;intracellular organelle;intracellular part;membrane-bounded organelle;nucleus;organelle	336030000000	175590000000	160450000000	3.52052	0.000704545	1.00555	11.735	3.76947	0	1.13947	13.5838	3.77717	0	1.1951	13.6453	11.0672	0.120404	P07245	P07245	C-1-tetrahydrofolate synthase. cytoplasmic;Methylenetetrahydrofolate dehydrogenase;Methenyltetrahydrofolate cyclohydrolase;Formyltetrahydrofolate synthetase	VII	905934	908774
ADH3	YMR083W	-0.567078	-0.0941167	0.260829	0.356813	2N_1N;3N_1N;4N_1N	alcohol biosynthetic process;alcohol metabolic process;amine catabolic process;amine metabolic process;amino acid catabolic process to alcohol via Ehrlich pathway;amino acid catabolic process via Ehrlich pathway;biosynthetic process;carboxylic acid catabolic process;carboxylic acid metabolic process;catabolic process;cellular amine metabolic process;cellular amino acid catabolic process;cellular …	cell part;cytoplasmic part;intracellular organelle lumen;intracellular organelle part;intracellular part;membrane-enclosed lumen;mitochondrial matrix;mitochondrial part;organelle lumen;organelle part	87168000000	50644000000	36525000000	4.83397	0	0.79476	25.2289	5.35931	0	1.20621	34.1779	6.41651	0	1.41203	62.8758	16.6098	0.354687	P07246	P07246	Alcohol dehydrogenase 3. mitochondrial	XIII	434788	435915
ADR1	YDR216W	-0.117339	0.851629	-0.274278	0.0621414	2N_1N;4N_1N	biological regulation;biosynthetic process;cellular biosynthetic process;cellular component organization;cellular component organization at cellular level;cellular component organization or biogenesis;cellular component organization or biogenesis at cellular level;cellular macromolecule biosynthetic process;cellular macromolecule metabolic process;cellular metabolic process;cellular nitrogen comp…	cell part;intracellular membrane-bounded organelle;intracellular organelle;intracellular part;membrane-bounded organelle;nucleus;organelle	2189500000	1337500000	852020000	2.67563	0.00235019	1.23158	7.07125	0	0.944752	0.210315	0	2.13183	0.00102595	0.674898	5.02067	4.80746	0.0464418	P07248	P07248	Regulatory protein ADR1	IV	895035	899006
ATP1	YBL099W	-0.803217	-0.781061	-0.308001	-0.256187	2N_1N;3N_1N;4N_1N	ATP biosynthetic process;ATP hydrolysis coupled proton transport;ATP metabolic process;ATP synthesis coupled proton transport;biosynthetic process;cation transport;cellular biosynthetic process;cellular metabolic process;cellular nitrogen compound biosynthetic process;cellular nitrogen compound metabolic process;cellular process;energy coupled proton transport. against electrochemical gradient;en…	cell part;cytoplasmic part;cytosol;intracellular membrane-bounded organelle;intracellular non-membrane-bounded organelle;intracellular organelle;intracellular organelle part;intracellular part;macromolecular complex;membrane part;membrane-bounded organelle;membrane-enclosed lumen;mitochondrial intermembrane space;mitochondrial membrane part;mitochondrial nucleoid;mitochondrial part;mitochondrial …	240990000000	112160000000	128840000000	2.71021	0.00199194	0.371781	7.22272	4.19192	0	0.957791	17.3836	4.45804	0	1.10877	20.2907	11.3602	0.130521	P07251	P07251	ATP synthase subunit alpha. mitochondrial	II	37053	38690
CBP6	YBR120C	0.170613	-0.19078	-0.54791	-0.420676	3N_1N	biological regulation;cellular component assembly;cellular component assembly at cellular level;cellular component biogenesis;cellular component organization;cellular component organization at cellular level;cellular component organization or biogenesis;cellular component organization or biogenesis at cellular level;cellular macromolecular complex assembly;cellular macromolecular complex subunit …	cell part;cytoplasmic part;intracellular non-membrane-bounded organelle;intracellular organelle;intracellular organelle part;intracellular part;macromolecular complex;mitochondrial part;mitochondrial ribosome;non-membrane-bounded organelle;organellar ribosome;organelle;organelle part;ribonucleoprotein complex;ribosome	11333000000	5294900000	6038400000	0.0639135	0.932049	0.0188157	0.183747	1.84803	0.00472214	-0.317804	-4.15612	0.707527	0.0812361	-0.130843	-1.5499	2.61947	0.138359	P07253	P07253	Cytochrome B pre-mRNA-processing protein 6	II	480435	480923
COX9	YDL067C	0.807567	-0.0284541	-0.449546	-0.181528	2N_1N;3N_1N;4N_1N	cellular metabolic process;cellular process;electron transport chain;generation of precursor metabolites and energy;metabolic process;mitochondrial electron transport. cytochrome c to oxygen;oxidation-reduction process;respiratory electron transport chain	cell part;cytoplasmic part;integral to membrane;intracellular organelle part;intracellular part;intrinsic to membrane;macromolecular complex;membrane part;mitochondrial membrane part;mitochondrial part;mitochondrial respiratory chain complex IV;organelle part;protein complex;respiratory chain complex IV	22471000000	11811000000	10660000000	2.32409	0.00355	-0.498095	-5.68014	3.37476	0.000666667	-0.883221	-10.7667	2.46137	0.000383169	-0.510631	-6.19286	8.16022	0.0579463	P07255	P07255	Cytochrome c oxidase subunit 7A	IV	334217	334396
COR1	YBL045C	-0.830558	-0.717743	-0.467107	-0.117186	2N_1N;3N_1N;4N_1N	aerobic respiration;cellular metabolic process;cellular process;cellular respiration;energy derivation by oxidation of organic compounds;generation of precursor metabolites and energy;metabolic process;oxidation-reduction process	cell part;cytoplasmic part;intracellular membrane-bounded organelle;intracellular organelle;intracellular organelle part;intracellular part;macromolecular complex;membrane part;membrane-bounded organelle;mitochondrial membrane part;mitochondrial part;mitochondrial respiratory chain complex III;mitochondrion;organelle;organelle part;protein complex;respiratory chain complex III	261330000000	128580000000	132740000000	2.57881	0.00276036	0.495297	6.66187	4.03506	0	0.771714	15.8653	5.22974	0	1.1932	31.7143	11.8436	0.148762	P07256	P07256	Cytochrome b-c1 complex subunit 1. mitochondrial	II	134143	135516
QCR2	YPR191W	-0.572965	-0.534599	-0.506048	-0.207142	2N_1N;3N_1N;4N_1N	aerobic respiration;cellular metabolic process;cellular process;cellular respiration;electron transport chain;energy derivation by oxidation of organic compounds;generation of precursor metabolites and energy;metabolic process;mitochondrial electron transport. ubiquinol to cytochrome c;oxidation-reduction process;respiratory electron transport chain	cell part;cytoplasmic part;intracellular membrane-bounded organelle;intracellular organelle;intracellular organelle part;intracellular part;macromolecular complex;membrane part;membrane-bounded organelle;mitochondrial crista;mitochondrial membrane part;mitochondrial part;mitochondrial respiratory chain complex III;mitochondrion;organelle;organelle part;protein complex;respiratory chain complex III	223190000000	108950000000	114240000000	1.91417	0.00852069	0.453849	4.34705	2.23216	0.00302096	0.556091	5.3567	3.07894	0.000124191	0.941134	9.02805	7.22526	0.0494095	P07257	P07257	Cytochrome b-c1 complex subunit 2. mitochondrial	XVI	919381	920487
CPA1	YOR303W	0.522113	0.751531	1.32354	0.833592	2N_1N;3N_1N;4N_1N	amine biosynthetic process;amine catabolic process;amine metabolic process;arginine biosynthetic process;arginine metabolic process;biosynthetic process;carbamoyl phosphate biosynthetic process;carbamoyl phosphate metabolic process;carboxylic acid biosynthetic process;carboxylic acid catabolic process;carboxylic acid metabolic process;catabolic process;cellular amine metabolic process;cellular am…	carbamoyl-phosphate synthase complex;cell part;cytoplasmic part;intracellular part;macromolecular complex;protein complex	14773000000	10009000000	4764800000	1.76399	0.0106322	0.734582	3.92198	3.01805	0.000942496	1.37068	8.70424	1.80152	0.00359205	0.835201	4.0254	6.58357	0.0459308	P07258	P07258	Carbamoyl-phosphate synthase arginine-specific small chain	XV	882899	884134
URA2	YJL130C	-0.982169	-0.200294	0.651898	-0.0674279	2N_1N;3N_1N;4N_1N	amine catabolic process;amine metabolic process;biological regulation;biosynthetic process;carbamoyl phosphate biosynthetic process;carbamoyl phosphate metabolic process;carboxylic acid catabolic process;carboxylic acid metabolic process;catabolic process;cellular amine metabolic process;cellular amino acid catabolic process;cellular amino acid metabolic process;cellular aromatic compound metabol…	cell part;cytoplasm;integral to membrane;intracellular part;intrinsic to membrane;membrane part	443390000000	245960000000	197430000000	3.10117	0.00142222	1.01488	9.14902	5.03235	0	2.00479	28.2959	4.17901	0	1.37798	17.2534	12.3125	0.171122	P07259	P07259	Protein URA2;Glutamine-dependent carbamoyl-phosphate synthase;Aspartate carbamoyltransferase	X	165723	172367
CDC33	YOL139C	0.604918	-0.260814	0.0713081	0.173981	2N_1N	biological regulation;catabolic process;cellular catabolic process;cellular macromolecule catabolic process;cellular macromolecule metabolic process;cellular metabolic process;cellular nitrogen compound metabolic process;cellular process;macromolecule catabolic process;macromolecule metabolic process;metabolic process;mRNA catabolic process;mRNA metabolic process;nitrogen compound metabolic proce…	cell part;cytoplasm;cytoplasmic part;eukaryotic translation initiation factor 4F complex;intracellular membrane-bounded organelle;intracellular non-membrane-bounded organelle;intracellular organelle;intracellular part;macromolecular complex;membrane-bounded organelle;non-membrane-bounded organelle;nucleus;organelle;protein complex;ribonucleoprotein complex;ribosome;RNA granule;stress granule	189970000000	104670000000	85305000000	1.9769	0.00734098	-0.500595	-4.53387	0.492391	0.205528	-0.126426	-1.12954	0.167322	0.807104	0.0431346	0.443607	2.63662	0.13684	P07260	P07260	Eukaryotic translation initiation factor 4E	XV	60383	61024
GDH1	YOR375C	-1.17191	-0.865902	-0.177226	0.141176	2N_1N;3N_1N;4N_1N	amine biosynthetic process;amine metabolic process;ammonia assimilation cycle;biosynthetic process;carboxylic acid biosynthetic process;carboxylic acid metabolic process;cellular amine metabolic process;cellular amino acid biosynthetic process;cellular amino acid metabolic process;cellular biosynthetic process;cellular ketone metabolic process;cellular metabolic process;cellular nitrogen compound…	cell part;intracellular membrane-bounded organelle;intracellular organelle;intracellular part;membrane-bounded organelle;nucleus;organelle	535900000000	275620000000	260280000000	3.00105	0.00188701	0.716757	8.61572	4.66181	0	1.43969	22.8353	5.00263	0	1.86118	27.814	12.6655	0.185027	P07262	P07262	NADP-specific glutamate dehydrogenase 1	XV	1041678	1043042
HTS1	YPR033C	-0.538787	0.00237418	0.267827	0.277211	2N_1N;3N_1N;4N_1N	amine metabolic process;amino acid activation;biosynthetic process;carboxylic acid metabolic process;cellular amine metabolic process;cellular amino acid metabolic process;cellular biosynthetic process;cellular component organization;cellular component organization at cellular level;cellular component organization or biogenesis;cellular component organization or biogenesis at cellular level;cellu…	cell part;cytoplasm;cytoplasmic part;intracellular membrane-bounded organelle;intracellular organelle;intracellular part;membrane-bounded organelle;mitochondrion;organelle	129060000000	76846000000	52215000000	2.95455	0.00177188	0.919558	8.37789	3.46338	0.000734177	1.24962	11.346	3.58734	0	1.37454	12.206	10.0053	0.0894701	P07263	P07263	Histidine--tRNA ligase. mitochondrial	XVI	637379	639019
LEU1	YGL009C	0.897699	1.03541	1.34003	1.25314	2N_1N;3N_1N;4N_1N	amine biosynthetic process;amine metabolic process;biosynthetic process;branched chain family amino acid biosynthetic process;branched chain family amino acid metabolic process;carboxylic acid biosynthetic process;carboxylic acid metabolic process;cellular amine metabolic process;cellular amino acid biosynthetic process;cellular amino acid metabolic process;cellular biosynthetic process;cellular …	3-isopropylmalate dehydratase complex;cell part;cytoplasmic part;cytosol;cytosolic part;intracellular part;macromolecular complex;protein complex	985370000000	710730000000	274640000000	3.12443	0.00145455	0.442298	9.27722	3.46086	0.000732632	0.788857	11.3291	3.471	0.000171429	0.781036	11.3971	10.0563	0.0907879	P07264	P07264	3-isopropylmalate dehydratase	VII	476313	478652
PEP4	YPL154C	-0.395415	-0.542821	-0.61246	-0.267188	2N_1N;3N_1N;4N_1N	autophagy;catabolic process;cell communication;cellular catabolic process;cellular component organization;cellular component organization or biogenesis;cellular membrane organization;cellular metabolic process;cellular process;cellular response to external stimulus;cellular response to extracellular stimulus;cellular response to nutrient levels;cellular response to starvation;cellular response to…	cell part;cytoplasmic part;fungal-type vacuole;intracellular membrane-bounded organelle;intracellular organelle;intracellular part;lytic vacuole;membrane-bounded organelle;organelle;storage vacuole;vacuole	169510000000	78693000000	90817000000	1.70299	0.0119785	0.179086	3.75763	1.72772	0.00616455	0.171911	3.8237	3.57873	0	0.582297	12.1443	7.00944	0.0478471	P07267	P07267	Saccharopepsin	XVI	259714	260931
DST1	YGL043W	0.671204	0.37849	0.0193912	0.00887091	3N_1N;4N_1N	biological regulation;biosynthetic process;cellular biosynthetic process;cellular component assembly;cellular component assembly at cellular level;cellular component organization;cellular component organization at cellular level;cellular component organization or biogenesis;cellular component organization or biogenesis at cellular level;cellular macromolecular complex assembly;cellular macromolec…	cell part;intracellular membrane-bounded organelle;intracellular organelle;intracellular part;membrane-bounded organelle;nucleus;organelle	48562000000	28165000000	20397000000	0.355292	0.463066	0.0335585	0.853916	2.32545	0.00271644	-0.248465	-5.68503	1.3111	0.0136609	-0.155231	-2.79915	3.99184	0.0586112	P07273	P07273	Transcription elongation factor S-II	VII	417483	418412
PFY1	YOR122C	1.63858	0.89091	0.36938	0.0387559	3N_1N;4N_1N	biological regulation;cellular component organization;cellular component organization or biogenesis;establishment of localization;establishment of localization in cell;intracellular transport;maintenance of location;maintenance of protein location;negative regulation of actin filament polymerization;negative regulation of biological process;negative regulation of cellular component organization;n…	cell part;cytoplasmic part;cytoskeleton;cytosol;extrinsic to membrane;extrinsic to plasma membrane;intracellular non-membrane-bounded organelle;intracellular organelle;intracellular part;membrane part;non-membrane-bounded organelle;organelle;plasma membrane part	43208000000	28597000000	14612000000	0.681317	0.149195	-0.261227	-1.49879	1.80833	0.00535729	-0.746992	-4.04437	2.34308	0.00045042	-1.0023	-5.74888	4.83272	0.0462666	P07274	P07274	Profilin	XV	552298	552887
PUT2	YHR037W	-1.18172	-0.476917	-0.363933	-0.0553504	2N_1N;3N_1N;4N_1N	amine biosynthetic process;amine catabolic process;amine metabolic process;biosynthetic process;carboxylic acid biosynthetic process;carboxylic acid catabolic process;carboxylic acid metabolic process;catabolic process;cellular amine metabolic process;cellular amino acid biosynthetic process;cellular amino acid catabolic process;cellular amino acid metabolic process;cellular biosynthetic process;…	cell part;cytoplasmic part;intracellular organelle lumen;intracellular organelle part;intracellular part;membrane;membrane-enclosed lumen;mitochondrial inner membrane;mitochondrial matrix;mitochondrial membrane;mitochondrial part;organelle inner membrane;organelle lumen;organelle membrane;organelle part	23935000000	11892000000	12042000000	1.7169	0.0117117	0.914152	3.79469	2.22145	0.00309076	1.20372	5.32001	2.67462	0.000303644	1.59291	7.0669	6.61297	0.0462882	P07275	P07275	Delta-1-pyrroline-5-carboxylate dehydrogenase. mitochondrial	VIII	181977	183704
RAD2	YGR258C	0.596977	0.338705	0.0168924	0.242003		biosynthetic process;cellular biosynthetic process;cellular macromolecule biosynthetic process;cellular macromolecule metabolic process;cellular metabolic process;cellular nitrogen compound metabolic process;cellular process;macromolecule biosynthetic process;macromolecule metabolic process;metabolic process;nitrogen compound metabolic process;nucleic acid metabolic process;nucleic acid phosphodi…	cell part;intracellular organelle part;intracellular part;macromolecular complex;nuclear part;nucleotide-excision repair complex;nucleotide-excision repair factor 3 complex;organelle part;protein complex	1041500000	617140000	424360000	0	0.956587	0.0772453	0	0	0.944413	-0.18185	0	0.00839301	1	0.019405	0.0260411	0.00839301	1	P07276	P07276	DNA repair protein RAD2	VII	1007671	1010766
ERG12	YMR208W	-0.46346	-0.402802	0.0207814	0.170233	3N_1N;4N_1N	acetyl-CoA metabolic process;alcohol biosynthetic process;alcohol metabolic process;biosynthetic process;cellular alcohol biosynthetic process;cellular alcohol metabolic process;cellular biosynthetic process;cellular lipid metabolic process;cellular metabolic process;cellular process;coenzyme metabolic process;cofactor metabolic process;ergosterol biosynthetic process;ergosterol metabolic process…	cell part;cytoplasm;intracellular part	14052000000	8228000000	5823600000	0.504963	0.269575	0.243984	1.15433	1.71376	0.006144	0.748188	3.7863	2.11747	0.00124127	0.966073	4.97394	4.33619	0.052	P07277	P07277	Mevalonate kinase	XIII	684467	685798
BCY1	YIL033C	-0.0289529	-0.110258	-0.412327	-0.0228328	2N_1N;4N_1N	biological regulation;negative regulation of biological process;negative regulation of catalytic activity;negative regulation of cell communication;negative regulation of cellular process;negative regulation of kinase activity;negative regulation of molecular function;negative regulation of protein kinase activity;negative regulation of protein serine/threonine kinase activity;negative regulation…	cAMP-dependent protein kinase complex;cell part;cytoplasm;intracellular membrane-bounded organelle;intracellular organelle;intracellular part;macromolecular complex;membrane;membrane-bounded organelle;nucleus;organelle;plasma membrane;protein complex	161560000000	85010000000	76555000000	2.08656	0.00601354	0.246176	4.87451	0.109538	0.886827	0.0152018	0.302888	3.11774	0.000128342	0.479627	9.24016	5.31383	0.0441721	P07278	P07278	cAMP-dependent protein kinase regulatory subunit	IX	290419	291669
RPS19A	YOL121C	1.13413	0.48307	0.113296	-0.207269	2N_1N;3N_1N;4N_1N	biosynthetic process;cellular biosynthetic process;cellular component biogenesis;cellular component biogenesis at cellular level;cellular component organization or biogenesis;cellular component organization or biogenesis at cellular level;cellular macromolecule biosynthetic process;cellular macromolecule metabolic process;cellular metabolic process;cellular process;cellular protein metabolic proc…	cell part;cytosolic small ribosomal subunit;intracellular organelle part;intracellular part;macromolecular complex;organelle part;ribonucleoprotein complex;small ribosomal subunit	892540000000	507880000000	384660000000	1.63204	0.0136318	-0.33655	-3.57206	2.78325	0.001414	-0.660827	-7.55211	3.25656	0.000140969	-0.871469	-10.0375	7.67185	0.0519671	P07280	P07280	40S ribosomal protein S19-A	XV	92026	92850
RPS19B	YNL302C	NaN	0.497586	0.197331	NaN		biosynthetic process;cellular biosynthetic process;cellular component biogenesis;cellular component biogenesis at cellular level;cellular component organization or biogenesis;cellular component organization or biogenesis at cellular level;cellular macromolecule biosynthetic process;cellular macromolecule metabolic process;cellular metabolic process;cellular process;cellular protein metabolic proc…	cell part;cytosolic small ribosomal subunit;intracellular organelle part;intracellular part;macromolecular complex;organelle part;ribonucleoprotein complex;small ribosomal subunit	4003900000	2477300000	1526600000	0	0.956257	NaN	0	0	0.948399	NaN	0	NaN	1	0	NaN	NaN	0.368977	P07281	P07281	40S ribosomal protein S19-B	XIV	61958	62943
SEC53	YFL045C	-0.479739	-0.193767	0.142597	0.264974	2N_1N;3N_1N;4N_1N	alcohol biosynthetic process;alcohol metabolic process;biosynthetic process;carbohydrate biosynthetic process;carbohydrate metabolic process;cellular biosynthetic process;cellular carbohydrate biosynthetic process;cellular carbohydrate metabolic process;cellular metabolic process;cellular nitrogen compound metabolic process;cellular process;establishment of localization;establishment of localizat…	cell part;cytoplasmic part;cytosol;intracellular part	235920000000	126460000000	109450000000	3.3809	0.000561086	0.677801	10.806	4.53104	0	0.982044	21.1684	5.47337	0	1.24784	36.5037	13.3853	0.231863	P07283	P07283	Phosphomannomutase	VI	43628	44392
SES1	YDR023W	0.211342	0.0780849	0.169759	0.227089	4N_1N	amine metabolic process;amino acid activation;carboxylic acid metabolic process;cellular amine metabolic process;cellular amino acid metabolic process;cellular ketone metabolic process;cellular macromolecule metabolic process;cellular metabolic process;cellular nitrogen compound metabolic process;cellular process;macromolecule metabolic process;metabolic process;ncRNA metabolic process;nitrogen c…	cell part;cytoplasm;intracellular part	402880000000	241860000000	161020000000	0.421668	0.363388	0.180161	0.98881	0.841803	0.0566703	0.31103	1.81359	1.26586	0.01554	0.464636	2.69779	2.52933	0.147564	P07284	P07284	Serine--tRNA ligase. cytoplasmic	IV	489508	490896
TRP4	YDR354W	-0.649233	-0.17552	0.599693	0.378824	2N_1N;3N_1N;4N_1N	amine biosynthetic process;amine metabolic process;aromatic amino acid family biosynthetic process;aromatic amino acid family metabolic process;aromatic compound biosynthetic process;biosynthetic process;carboxylic acid biosynthetic process;carboxylic acid metabolic process;cellular amine metabolic process;cellular amino acid biosynthetic process;cellular amino acid metabolic process;cellular aro…		12937000000	8047400000	4889600000	2.65931	0.00231862	0.902598	7.00075	4.07748	0	1.64465	16.2626	3.51829	0.000178439	1.58229	11.7196	10.2551	0.0953466	P07285	P07285	Anthranilate phosphoribosyltransferase	IV	1184747	1185889
ILV2	YMR108W	0.254867	0.552216	0.804127	0.889206	2N_1N;3N_1N;4N_1N	amine biosynthetic process;amine metabolic process;biosynthetic process;branched chain family amino acid biosynthetic process;branched chain family amino acid metabolic process;carboxylic acid biosynthetic process;carboxylic acid metabolic process;cellular amine metabolic process;cellular amino acid biosynthetic process;cellular amino acid metabolic process;cellular biosynthetic process;cellular …	acetolactate synthase complex;cell part;cytoplasmic part;intracellular membrane-bounded organelle;intracellular organelle;intracellular part;macromolecular complex;membrane-bounded organelle;mitochondrion;organelle;protein complex	241180000000	156950000000	84226000000	3.20046	0.00122744	0.576379	9.70787	3.65871	0	0.859513	12.7292	4.56305	0	1.0762	21.5651	11.4222	0.132691	P07342	P07342	Acetolactate synthase catalytic subunit. mitochondrial	XIII	484084	486147
ARD1	YHR013C	-0.161536	-0.527695	-0.331942	-0.0308877		cellular component organization;cellular component organization at cellular level;cellular component organization or biogenesis;cellular component organization or biogenesis at cellular level;cellular macromolecule metabolic process;cellular metabolic process;cellular process;cellular protein metabolic process;chromatin modification;chromatin organization;chromosome organization;covalent chromati…	cell part;cytoplasmic part;intracellular part;macromolecular complex;NatA complex;N-terminal protein acetyltransferase complex;protein acetyltransferase complex;protein complex	8253300000	4216500000	4036800000	0.291111	0.572583	-0.256612	-0.71964	0.116478	0.876693	0.113363	0.320329	0.599072	0.122258	0.464265	1.33857	1.00666	0.569998	P07347	P07347	N-terminal acetyltransferase A complex catalytic subunit ARD1	VIII	130730	131446
SEC4	YFL005W	-0.97059	-0.696112	-0.0839466	0.140837	2N_1N;3N_1N;4N_1N	anatomical structure formation involved in morphogenesis;ascospore-type prospore formation;asexual reproduction;autophagy;biological regulation;bipolar cellular bud site selection;catabolic process;cell budding;cell division;cellular bud site selection;cellular catabolic process;cellular component assembly;cellular component assembly at cellular level;cellular component assembly involved in morph…	actin cap;cell cortex part;cell part;cell projection part;cytoplasmic membrane-bounded vesicle;cytoplasmic part;cytoplasmic vesicle;cytoplasmic vesicle membrane;cytoplasmic vesicle part;cytoskeletal part;incipient cellular bud site;intracellular membrane-bounded organelle;intracellular organelle;intracellular organelle part;intracellular part;mating projection tip;membrane;membrane-bounded organe…	65707000000	36396000000	29311000000	2.71585	0.00200406	0.64949	7.2477	4.71334	0	1.24812	23.5272	4.71114	0	1.5979	23.4972	12.1403	0.162932	P07560	P07560	Ras-related protein SEC4	VI	130334	130981
RPC40	YPR110C	0.294888	0.321511	0.455639	0.50553	2N_1N;3N_1N;4N_1N	biosynthetic process;cellular biosynthetic process;cellular component biogenesis;cellular component biogenesis at cellular level;cellular component organization or biogenesis;cellular component organization or biogenesis at cellular level;cellular macromolecule biosynthetic process;cellular macromolecule metabolic process;cellular metabolic process;cellular nitrogen compound metabolic process;cel…	cell part;DNA-directed RNA polymerase complex;DNA-directed RNA polymerase I complex;DNA-directed RNA polymerase III complex;intracellular organelle part;intracellular part;macromolecular complex;nuclear DNA-directed RNA polymerase complex;nuclear part;nucleolar part;nucleoplasm;nucleoplasm part;organelle part;protein complex;RNA polymerase complex	75994000000	47900000000	28094000000	1.52104	0.0157666	0.337485	3.29311	2.36575	0.00246461	0.517756	5.83185	2.88463	0.000109215	0.697264	8.03147	6.77142	0.0465843	P07703	P07703	DNA-directed RNA polymerases I and III subunit RPAC1	XVI	745828	746835
VAS1	YGR094W	-0.19627	0.162905	0.271612	0.249318	2N_1N;3N_1N;4N_1N	amine metabolic process;amino acid activation;carboxylic acid metabolic process;cellular amine metabolic process;cellular amino acid metabolic process;cellular ketone metabolic process;cellular macromolecule metabolic process;cellular metabolic process;cellular nitrogen compound metabolic process;cellular process;macromolecule metabolic process;metabolic process;ncRNA metabolic process;nitrogen c…	cell part;cytoplasm;cytoplasmic part;intracellular membrane-bounded organelle;intracellular organelle;intracellular part;membrane-bounded organelle;mitochondrion;organelle	548430000000	304930000000	243510000000	3.9049	0	0.688611	14.7043	4.72727	0	0.834927	23.7177	5.05703	0	0.910529	28.7025	13.6892	0.24628	P07806	P07806	Valine--tRNA ligase. mitochondrial	VII	672186	675500
DFR1	YOR236W	0.692228	-0.139152	0.310084	0.35241		amine biosynthetic process;amine metabolic process;aromatic compound biosynthetic process;biosynthetic process;carboxylic acid biosynthetic process;carboxylic acid metabolic process;cellular amine metabolic process;cellular amino acid biosynthetic process;cellular amino acid metabolic process;cellular aromatic compound metabolic process;cellular biosynthetic process;cellular ketone metabolic proc…	cell part;cytoplasmic part;cytosol;intracellular part	5756400000	3429800000	2326600000	0.0674037	0.928126	-0.104495	-0.193165	0.252126	0.617157	0.345415	0.635578	0.434889	0.248457	0.546822	1.01531	0.754419	0.7094	P07807	P07807	Dihydrofolate reductase	XV	780906	781541
CDC4	YFL009W	-1.08421	0.163537	-0.0210278	-0.282329		anatomical structure formation involved in morphogenesis;catabolic process;cell cycle phase;cell cycle process;cell differentiation;cell division;cellular catabolic process;cellular component organization;cellular component organization at cellular level;cellular component organization or biogenesis;cellular component organization or biogenesis at cellular level;cellular developmental process;cel…	cell part;cullin-RING ubiquitin ligase complex;intracellular membrane-bounded organelle;intracellular organelle;intracellular organelle part;intracellular part;macromolecular complex;membrane-bounded organelle;nuclear matrix;nuclear part;nuclear SCF ubiquitin ligase complex;nuclear ubiquitin ligase complex;nucleus;organelle;organelle part;protein complex;SCF ubiquitin ligase complex;ubiquitin lig…	2163000000	1181300000	981680000	0	0.953242	1.49258	0	0	0.948728	1.46142	0	0	1	1.29628	0	0	1	P07834	P07834	Cell division control protein 4	VI	116145	118484
CAR2	YLR438W	-0.663751	-0.54219	-0.244384	-0.193623	2N_1N;3N_1N;4N_1N	amine biosynthetic process;amine catabolic process;amine metabolic process;arginine catabolic process;arginine metabolic process;biosynthetic process;carboxylic acid biosynthetic process;carboxylic acid catabolic process;carboxylic acid metabolic process;catabolic process;cellular amine metabolic process;cellular amino acid biosynthetic process;cellular amino acid catabolic process;cellular amino…	cell part;cytoplasmic part;cytosol;intracellular part	70709000000	35495000000	35214000000	3.43849	0.000599034	0.427147	11.1804	5.06437	0	0.795667	28.8244	4.80032	0	0.947316	24.7423	13.3032	0.224208	P07991	P07991	Ornithine aminotransferase	XII	1012501	1013775
CHS1	YNL192W	-1.19314	-1.02971	-0.487997	-0.198995	4N_1N	amine metabolic process;aminoglycan biosynthetic process;aminoglycan metabolic process;biosynthetic process;carbohydrate biosynthetic process;carbohydrate metabolic process;cell wall organization;cell wall organization or biogenesis;cellular component organization or biogenesis;cellular process;chitin biosynthetic process;chitin metabolic process;cytokinetic cell separation;cytokinetic process;ma…	cell part;chitosome;cytoplasmic membrane-bounded vesicle;cytoplasmic part;cytoplasmic vesicle;integral to membrane;intracellular membrane-bounded organelle;intracellular organelle;intracellular part;intrinsic to membrane;membrane;membrane part;membrane-bounded organelle;membrane-bounded vesicle;organelle;plasma membrane;vesicle	2323400000	1148300000	1175100000	0.151297	0.81222	0.49895	0.435273	0.41266	0.291672	1.10338	1.09819	0.875051	0.0438966	1.55845	2.04552	1.43901	0.380353	P08004	P08004	Chitin synthase 1	XIV	276502	279897
PBS2	YJL128C	0.542695	0.372921	0.111517	-0.324717	4N_1N	actin cytoskeleton organization;actin filament organization;actin filament-based process;activation of MAPK activity;activation of MAPK activity involved in osmosensory signaling pathway;biological regulation;cellular component organization;cellular component organization at cellular level;cellular component organization or biogenesis;cellular component organization or biogenesis at cellular leve…	cell part;cellular bud neck;cellular bud tip;cytoplasm;cytoplasmic part;intracellular part;macromolecular complex;NatB complex;N-terminal protein acetyltransferase complex;protein acetyltransferase complex;protein complex;site of polarized growth	17217000000	9372700000	7844000000	0.68855	0.146538	0.197263	1.51289	0.028491	0.984444	0.0108347	0.0847898	1.03303	0.0280713	-0.378567	-2.19976	1.75007	0.285197	P08018	P08018	MAP kinase kinase PBS2	X	178097	180103
RIP1	YEL024W	0.920909	-0.934126	-0.782933	-0.457319	2N_1N;3N_1N;4N_1N	aerobic respiration;cellular metabolic process;cellular process;cellular respiration;electron transport chain;energy derivation by oxidation of organic compounds;generation of precursor metabolites and energy;metabolic process;mitochondrial electron transport. ubiquinol to cytochrome c;oxidation-reduction process;respiratory electron transport chain	cell part;cytoplasmic part;intracellular membrane-bounded organelle;intracellular organelle;intracellular organelle part;intracellular part;macromolecular complex;membrane part;membrane-bounded organelle;mitochondrial membrane part;mitochondrial part;mitochondrial respiratory chain complex III;mitochondrion;organelle;organelle part;protein complex;respiratory chain complex III	18056000000	8527000000	9529400000	2.29075	0.00404324	-1.34138	-5.56105	2.01364	0.00364599	-1.12416	-4.64595	1.28117	0.0148191	-0.673357	-2.73192	5.58556	0.0435707	P08067	P08067	Cytochrome b-c1 complex subunit Rieske. mitochondrial	V	107260	107907
SWI5	YDR146C	-0.113882	-0.182476	-0.467405	-0.421113		biological regulation;biosynthetic process;cell cycle process;cellular biosynthetic process;cellular macromolecule biosynthetic process;cellular macromolecule metabolic process;cellular metabolic process;cellular nitrogen compound metabolic process;cellular process;macromolecule biosynthetic process;macromolecule metabolic process;metabolic process;nitrogen compound metabolic process;nucleic acid…	cell part;cytoplasm;intracellular membrane-bounded organelle;intracellular organelle;intracellular part;membrane-bounded organelle;nucleus;organelle	4586000000	2367900000	2218100000	0.0755047	0.917973	0.10163	0.214817	0.0287821	0.984408	0.0389853	0.0856304	0.251003	0.629992	0.265522	0.633122	0.35529	0.944282	P08153	P08153	Transcriptional factor SWI5	IV	748613	750742
FUM1	YPL262W	-0.462479	-0.385724	-0.233697	0.00937229	2N_1N;3N_1N;4N_1N	acetyl-CoA catabolic process;acetyl-CoA metabolic process;carboxylic acid metabolic process;catabolic process;cellular catabolic process;cellular ketone metabolic process;cellular metabolic process;cellular process;coenzyme catabolic process;coenzyme metabolic process;cofactor catabolic process;cofactor metabolic process;dicarboxylic acid metabolic process;fumarate metabolic process;metabolic pro…	cell part;cytoplasmic part;cytosol;intracellular membrane-bounded organelle;intracellular organelle;intracellular organelle lumen;intracellular organelle part;intracellular part;macromolecular complex;membrane-bounded organelle;membrane-enclosed lumen;mitochondrial matrix;mitochondrial part;mitochondrion;organelle;organelle lumen;organelle part;protein complex;tricarboxylic acid cycle enzyme comp…	113410000000	59577000000	53830000000	1.09769	0.0455491	0.34285	2.33451	1.80471	0.00534252	0.590281	4.03427	2.49265	0.000388033	0.931522	6.31494	5.39505	0.0439226	P08417	P08417	Fumarate hydratase. mitochondrial	XVI	47336	48802
MSF1	YPR047W	-0.205501	-0.369355	-0.404477	-0.344357		amine metabolic process;amino acid activation;carboxylic acid metabolic process;cellular amine metabolic process;cellular amino acid metabolic process;cellular ketone metabolic process;cellular macromolecule metabolic process;cellular metabolic process;cellular nitrogen compound metabolic process;cellular process;macromolecule metabolic process;metabolic process;mitochondrial phenylalanyl-tRNA am…	cell part;cytoplasmic part;intracellular membrane-bounded organelle;intracellular organelle;intracellular organelle lumen;intracellular organelle part;intracellular part;membrane-bounded organelle;membrane-enclosed lumen;mitochondrial matrix;mitochondrial part;mitochondrion;organelle;organelle lumen;organelle part	3718300000	1876000000	1842300000	0	0.95392	0.158322	0	0	0.946742	0.175758	0	0	1	0.383727	0	0	1	P08425	P08425	Phenylalanine--tRNA ligase. mitochondrial	XVI	657529	658938
SPE1	YKL184W	NaN	0.983946	0.273271	-0.268527		amine biosynthetic process;amine metabolic process;biosynthetic process;carboxylic acid biosynthetic process;carboxylic acid metabolic process;cellular amine metabolic process;cellular amino acid biosynthetic process;cellular amino acid metabolic process;cellular biogenic amine biosynthetic process;cellular biogenic amine metabolic process;cellular biosynthetic process;cellular ketone metabolic p…		1595700000	935670000	660080000	0	0.954262	NaN	0	0	0.948079	NaN	0	0	1	NaN	0	0	1	P08432	P08432	Ornithine decarboxylase	XI	96757	98157
MET2	YNL277W	NaN	NaN	0.0668133	NaN		amine biosynthetic process;amine metabolic process;aspartate family amino acid biosynthetic process;aspartate family amino acid metabolic process;biosynthetic process;carboxylic acid biosynthetic process;carboxylic acid metabolic process;cellular amine metabolic process;cellular amino acid biosynthetic process;cellular amino acid metabolic process;cellular biosynthetic process;cellular ketone met…	cell part;cytoplasm;intracellular part	17135000000	8280300000	8854600000	NaN	1	0	NaN	0	0.947734	NaN	0	NaN	1	0	NaN	NaN	0.372	P08465	P08465	Homoserine O-acetyltransferase	XIV	117349	118809
NUC1	YJL208C	0.266957	0.348448	0.667274	0.251038	3N_1N;4N_1N	apoptosis;catabolic process;cell death;cellular catabolic process;cellular macromolecule catabolic process;cellular macromolecule metabolic process;cellular metabolic process;cellular nitrogen compound metabolic process;cellular process;death;DNA catabolic process;DNA catabolic process. endonucleolytic;DNA fragmentation involved in apoptotic nuclear change;DNA metabolic process;DNA recombination;…	cell part;cytoplasmic part;intracellular membrane-bounded organelle;intracellular organelle;intracellular organelle part;intracellular part;membrane;membrane-bounded organelle;mitochondrial inner membrane;mitochondrial membrane;mitochondrial part;nucleus;organelle;organelle inner membrane;organelle membrane;organelle part	4691100000	3293100000	1398000000	0.837291	0.0938155	0.727601	1.80466	1.49219	0.00965056	1.09193	3.22274	1.76384	0.00412794	0.546421	4.79826	4.09332	0.0562091	P08466	P08466	Mitochondrial nuclease	X	40194	41183
RPB2	YOR151C	-1.24825	-0.552967	0.128816	0.176181	2N_1N;3N_1N;4N_1N	biosynthetic process;cellular biosynthetic process;cellular macromolecule biosynthetic process;cellular macromolecule metabolic process;cellular metabolic process;cellular nitrogen compound metabolic process;cellular process;macromolecule biosynthetic process;macromolecule metabolic process;metabolic process;nitrogen compound metabolic process;nucleic acid metabolic process;nucleobase-containing …	cell part;DNA-directed RNA polymerase complex;DNA-directed RNA polymerase II. core complex;intracellular organelle part;intracellular part;macromolecular complex;nuclear DNA-directed RNA polymerase complex;nuclear part;nucleoplasm part;organelle part;protein complex;RNA polymerase complex	47547000000	26363000000	21184000000	2.94024	0.00175328	1.1768	8.30591	5.15433	0	1.81332	30.3624	5.83284	0	1.92866	44.9148	13.9274	0.268542	P08518	P08518	DNA-directed RNA polymerase II subunit RPB2	XV	612997	616671
ERG20	YJL167W	-0.359298	-0.0578809	-0.254992	-0.390139	2N_1N;3N_1N;4N_1N	alcohol biosynthetic process;alcohol metabolic process;biosynthetic process;cellular alcohol biosynthetic process;cellular alcohol metabolic process;cellular biosynthetic process;cellular lipid metabolic process;cellular metabolic process;cellular process;ergosterol biosynthetic process;ergosterol metabolic process;farnesyl diphosphate biosynthetic process;farnesyl diphosphate metabolic process;g…	cell part;cytoplasm;cytoplasmic part;endoplasmic reticulum;intracellular membrane-bounded organelle;intracellular organelle;intracellular part;membrane-bounded organelle;organelle	286030000000	137700000000	148340000000	3.44104	0.000604878	0.671342	11.1973	3.1066	0.000683658	0.50348	9.17883	3.32252	0.0001493	0.48906	10.4385	9.87017	0.0873309	P08524	P08524	Farnesyl pyrophosphate synthase	X	105014	106072
QCR8	YJL166W	0.793002	-0.291381	-0.827107	-0.60269	2N_1N;3N_1N;4N_1N	aerobic respiration;cellular metabolic process;cellular process;cellular respiration;electron transport chain;energy derivation by oxidation of organic compounds;generation of precursor metabolites and energy;metabolic process;mitochondrial electron transport. ubiquinol to cytochrome c;oxidation-reduction process;respiratory electron transport chain	cell part;cytoplasmic part;intracellular organelle part;intracellular part;macromolecular complex;membrane part;mitochondrial membrane part;mitochondrial part;mitochondrial respiratory chain complex III;organelle part;protein complex;respiratory chain complex III	17998000000	8247500000	9750500000	2.95914	0.00178133	-0.702858	-8.40108	3.50063	0.000753247	-1.21619	-11.5982	3.24375	0.000139535	-0.88974	-9.96137	9.70352	0.0816	P08525	P08525	Cytochrome b-c1 complex subunit 8	X	106434	106718
MET3	YJR010W	-0.672262	0.657848	1.61525	NaN		amine biosynthetic process;amine metabolic process;aspartate family amino acid biosynthetic process;aspartate family amino acid metabolic process;biosynthetic process;carboxylic acid biosynthetic process;carboxylic acid metabolic process;cellular amine metabolic process;cellular amino acid biosynthetic process;cellular amino acid metabolic process;cellular biosynthetic process;cellular ketone met…	cell part;cytoplasm;intracellular part	1749200000	1161300000	587850000	0	0.954605	1.66563	0	0	0.947393	2.68575	0	0	1	NaN	0	0	1	P08536	P08536	Sulfate adenylyltransferase	X	456239	457774
GPA1	YHR005C	-0.159395	0.0293139	0.269462	0.260316	2N_1N;3N_1N;4N_1N	activation of adenylate cyclase activity;activation of adenylate cyclase activity by G-protein signaling pathway;adaptation of signaling pathway;adaptation of signaling pathway by response to pheromone involved in conjugation with cellular fusion;biological regulation;cAMP-mediated signaling;cell surface receptor linked signaling pathway;cellular component movement;cellular component organization…	cell part;cytoplasmic part;endosomal part;endosome;endosome membrane;extrinsic to internal side of plasma membrane;extrinsic to membrane;extrinsic to plasma membrane;heterotrimeric G-protein complex;intracellular membrane-bounded organelle;intracellular organelle;intracellular organelle part;intracellular part;macromolecular complex;membrane;membrane part;membrane-bounded organelle;organelle;orga…	14479000000	8162800000	6316500000	2.12675	0.00589623	0.490577	5.00411	3.01117	0.000937238	0.766717	8.66834	3.18114	0.000134266	0.875489	9.59674	8.31907	0.0594946	P08539	P08539	Guanine nucleotide-binding protein alpha-1 subunit	VIII	113499	114917
ARO1	YDR127W	-1.44589	-0.866478	-0.0916864	0.256687	2N_1N;3N_1N;4N_1N	amine biosynthetic process;amine metabolic process;aromatic amino acid family biosynthetic process;aromatic amino acid family metabolic process;aromatic compound biosynthetic process;biosynthetic process;carboxylic acid biosynthetic process;carboxylic acid metabolic process;cellular amine metabolic process;cellular amino acid biosynthetic process;cellular amino acid metabolic process;cellular aro…	cell part;cytoplasm;intracellular part	259410000000	138640000000	120760000000	4.25721	0	0.917456	18.0565	6.70265	0	1.73867	74.1427	6.51841	0	2.22453	66.6774	17.4783	0.377206	P08566	P08566	Pentafunctional AROM polypeptide;3-dehydroquinate synthase;3-phosphoshikimate 1-carboxyvinyltransferase;Shikimate kinase;3-dehydroquinate dehydratase;Shikimate dehydrogenase	IV	704484	709250
CYR1	YJL005W	0.351232	0.0647068	-0.408098	-0.811397	4N_1N	biological regulation;cAMP-mediated signaling;cell surface receptor linked signaling pathway;cellular process;cellular response to stimulus;cyclic-nucleotide-mediated signaling;G-protein coupled receptor protein signaling pathway;G-protein signaling. coupled to cAMP nucleotide second messenger;G-protein signaling. coupled to cyclic nucleotide second messenger;intracellular signal transduction;Ras…	cell part;cytoplasmic part;endoplasmic reticulum membrane;endoplasmic reticulum part;intracellular membrane-bounded organelle;intracellular organelle;intracellular organelle part;intracellular part;membrane;membrane part;membrane-bounded organelle;mitochondrion;organelle;organelle membrane;organelle part;plasma membrane	10427000000	5228200000	5198500000	0.208551	0.714756	0.137407	0.538732	0.476011	0.220468	-0.286552	-1.09716	1.28727	0.014766	-0.684683	-2.74555	1.97183	0.233578	P08678	P08678	Adenylate cyclase	X	425157	431237
CIT2	YCR005C	NaN	0.304156	0.200038	0.526274		acetyl-CoA catabolic process;acetyl-CoA metabolic process;amine biosynthetic process;amine metabolic process;biosynthetic process;carbohydrate metabolic process;carboxylic acid biosynthetic process;carboxylic acid metabolic process;catabolic process;cellular aldehyde metabolic process;cellular amine metabolic process;cellular amino acid biosynthetic process;cellular amino acid metabolic process;c…	cell part;cytoplasmic part;intracellular membrane-bounded organelle;intracellular organelle;intracellular part;membrane-bounded organelle;microbody;organelle;peroxisome	1050300000	656240000	394020000	0	0.953577	NaN	0	0	0.947058	NaN	0	0	1	NaN	0	0	0.989098	P08679	P08679	Citrate synthase. peroxisomal	III	120946	122328
MYO1	YHR023W	-0.243166	0.35883	0.0602595	0.0429317	2N_1N;3N_1N;4N_1N	actin cytoskeleton organization;actin filament-based process;actomyosin structure organization;assembly of actomyosin apparatus involved in cell cycle cytokinesis;cellular component assembly;cellular component assembly at cellular level;cellular component organization;cellular component organization at cellular level;cellular component organization or biogenesis;cellular component organization or…	cell part;cellular bud neck;cytoskeletal part;incipient cellular bud site;intracellular organelle part;intracellular part;macromolecular complex;myosin complex;myosin II complex;organelle part;protein complex;site of polarized growth	23833000000	13718000000	10115000000	2.54227	0.00266899	1.01061	6.51277	2.26363	0.00299315	0.830542	5.46569	2.40364	0.000372174	0.904307	5.97273	7.20953	0.0492789	P08964	P08964	Myosin-1	VIII	151666	157452
GCD1	YOR260W	-0.196542	-0.120316	0.316164	0.434673	2N_1N;3N_1N;4N_1N	biological regulation;positive regulation of catalytic activity;positive regulation of GTPase activity;positive regulation of hydrolase activity;positive regulation of molecular function;posttranscriptional regulation of gene expression;regulation of biological process;regulation of biosynthetic process;regulation of catabolic process;regulation of catalytic activity;regulation of cellular biosyn…	cell part;cytoplasmic part;eukaryotic translation initiation factor 2B complex;guanyl-nucleotide exchange factor complex;intracellular part;macromolecular complex;protein complex	43016000000	24614000000	18401000000	2.38336	0.00349178	0.47617	5.89699	4.35821	0	0.926261	19.1482	4.96092	0	1.1612	27.1511	11.7025	0.142125	P09032	P09032	Translation initiation factor eIF-2B subunit gamma	XV	813984	815720
SUI3	YPL237W	0.878123	0.326506	0.130301	0.180642	2N_1N;3N_1N;4N_1N	cellular component assembly;cellular component assembly at cellular level;cellular component organization;cellular component organization at cellular level;cellular component organization or biogenesis;cellular component organization or biogenesis at cellular level;cellular macromolecular complex assembly;cellular macromolecular complex subunit organization;cellular process;formation of translati…	cell part;cytoplasmic part;eukaryotic 43S preinitiation complex;eukaryotic translation initiation factor 2 complex;intracellular part;macromolecular complex;multi-eIF complex;protein complex;ribonucleoprotein complex;translation preinitiation complex	106300000000	57290000000	49010000000	1.13824	0.041853	-0.15826	-2.42033	2.21814	0.0030805	-0.312977	-5.30871	1.28707	0.0147579	-0.183137	-2.74512	4.64346	0.0482052	P09064	P09064	Eukaryotic translation initiation factor 2 subunit beta	XVI	100496	101353
PRB1	YEL060C	0.325324	-0.758893	-1.11807	-0.822875	2N_1N;3N_1N;4N_1N	anatomical structure formation involved in morphogenesis;catabolic process;cell communication;cell differentiation;cellular catabolic process;cellular developmental process;cellular macromolecule catabolic process;cellular macromolecule metabolic process;cellular metabolic process;cellular process;cellular protein catabolic process;cellular protein metabolic process;cellular response to external …	cell part;cytoplasmic part;fungal-type vacuole;fungal-type vacuole lumen;intracellular membrane-bounded organelle;intracellular organelle;intracellular organelle lumen;intracellular organelle part;intracellular part;lytic vacuole;membrane-bounded organelle;membrane-enclosed lumen;organelle;organelle lumen;organelle part;storage vacuole;vacuolar lumen;vacuolar part;vacuole	116010000000	46999000000	69011000000	3.07828	0.00167385	-0.761497	-9.02447	3.67485	0	-1.04839	-12.8504	2.80962	0.000104689	-0.628693	-7.67424	9.56274	0.0789264	P09232	P09232	Cerevisin	V	40046	41953
ILS1	YBL076C	-0.757	-0.258072	0.38067	0.291291	2N_1N;3N_1N;4N_1N	amine metabolic process;amino acid activation;carboxylic acid metabolic process;cellular amine metabolic process;cellular amino acid metabolic process;cellular ketone metabolic process;cellular macromolecule metabolic process;cellular metabolic process;cellular nitrogen compound metabolic process;cellular process;isoleucyl-tRNA aminoacylation;macromolecule metabolic process;metabolic process;ncRN…	cell part;cytoplasmic part;cytosol;intracellular part	334950000000	196810000000	138140000000	3.03733	0.00195322	0.875293	8.80558	4.88029	0	1.59357	25.9141	4.89385	0	1.59378	26.1181	12.8115	0.193252	P09436	P09436	Isoleucine--tRNA ligase. cytoplasmic	II	81043	84261
MIS1	YBR084W	0.113228	0.149404	0.370585	0.354357	2N_1N;3N_1N;4N_1N	amine biosynthetic process;amine metabolic process;aromatic compound biosynthetic process;aspartate family amino acid biosynthetic process;aspartate family amino acid metabolic process;biosynthetic process;carboxylic acid biosynthetic process;carboxylic acid metabolic process;cellular amine metabolic process;cellular amino acid biosynthetic process;cellular amino acid metabolic process;cellular a…	cell part;cytoplasmic part;intracellular membrane-bounded organelle;intracellular organelle;intracellular part;membrane-bounded organelle;mitochondrion;organelle	165680000000	96297000000	69379000000	1.62341	0.0141528	0.507759	3.5499	2.32294	0.00270922	0.758316	5.67601	2.49576	0.000390155	0.847625	6.32717	6.44211	0.0453728	P09440	P09440	C-1-tetrahydrofolate synthase. mitochondrial;Methylenetetrahydrofolate dehydrogenase;Methenyltetrahydrofolate cyclohydrolase;Formyltetrahydrofolate synthetase	II	411054	413981
ATP5	YDR298C	0.34858	-0.181088	-0.490129	-0.388909	2N_1N;3N_1N;4N_1N	ATP biosynthetic process;ATP metabolic process;ATP synthesis coupled proton transport;biosynthetic process;cation transport;cellular biosynthetic process;cellular metabolic process;cellular nitrogen compound biosynthetic process;cellular nitrogen compound metabolic process;cellular process;energy coupled proton transport. down electrochemical gradient;establishment of localization;heterocycle bio…	cell part;cytoplasmic part;intracellular organelle part;intracellular part;macromolecular complex;membrane part;mitochondrial membrane part;mitochondrial part;mitochondrial proton-transporting ATP synthase. stator stalk;organelle part;protein complex;proton-transporting ATP synthase. stator stalk	240080000000	119110000000	120970000000	1.53225	0.0153135	-0.175435	-3.3207	2.98138	0.000906883	-0.407056	-8.51437	1.89827	0.00261708	-0.202602	-4.3006	6.4119	0.0452232	P09457	P09457	ATP synthase subunit 5. mitochondrial	IV	1058176	1058814
SWI1	YPL016W	-0.326727	-0.0921479	0.150032	0.105376	3N_1N;4N_1N	alcohol catabolic process;alcohol metabolic process;ATP-dependent chromatin remodeling;biological regulation;biosynthetic process;carbohydrate catabolic process;carbohydrate metabolic process;carbon catabolite activation of transcription from RNA polymerase II promoter;carbon catabolite regulation of transcription;carbon catabolite regulation of transcription from RNA polymerase II promoter;catab…	cell part;chromatin remodeling complex;intracellular membrane-bounded organelle;intracellular organelle;intracellular organelle part;intracellular part;macromolecular complex;membrane-bounded organelle;nuclear part;nucleus;organelle;organelle part;protein complex;SWI/SNF complex;SWI/SNF-type complex	3641700000	2078700000	1563000000	0.583412	0.204049	0.512688	1.38174	1.04549	0.0306596	0.881492	2.47012	1.03932	0.0276145	0.923419	2.45411	2.66822	0.13389	P09547	P09547	SWI/SNF chromatin-remodeling complex subunit SWI1	XVI	521014	524958
KEX1	YGL203C	-0.321422	-0.224313	0.000891317	-0.158473	2N_1N;3N_1N;4N_1N	apoptosis;cell death;cellular process;death;programmed cell death	cell part;cytoplasmic part;Golgi apparatus part;integral to membrane;intracellular organelle part;intracellular part;intrinsic to membrane;membrane part;organelle part;trans-Golgi network	15448000000	8457500000	6990200000	2.32103	0.00354508	0.390661	5.66915	2.74258	0.00165006	0.626663	7.36709	3.15393	0.000132231	0.651734	9.44213	8.21754	0.058384	P09620	P09620	Pheromone-processing carboxypeptidase KEX1	VII	112475	114664
LPD1	YFL018C	-0.410442	-0.199151	-0.243574	-0.123925	2N_1N;3N_1N;4N_1N	2-oxoglutarate metabolic process;amine biosynthetic process;amine catabolic process;amine metabolic process;biological regulation;biosynthetic process;branched chain family amino acid catabolic process;branched chain family amino acid metabolic process;carboxylic acid biosynthetic process;carboxylic acid catabolic process;carboxylic acid metabolic process;catabolic process;cell redox homeostasis;…	cell part;cytoplasmic part;glycine cleavage complex;intracellular non-membrane-bounded organelle;intracellular organelle;intracellular organelle part;intracellular part;macromolecular complex;mitochondrial nucleoid;mitochondrial oxoglutarate dehydrogenase complex;mitochondrial part;mitochondrial pyruvate dehydrogenase complex;non-membrane-bounded organelle;nucleoid;organelle;organelle part;oxoglu…	326890000000	165860000000	161030000000	2.89161	0.00164938	0.496397	8.06547	3.43715	0.000716049	0.561561	11.1715	4.2462	0	0.761709	17.9413	10.575	0.10206	P09624	P09624	Dihydrolipoyl dehydrogenase. mitochondrial	VI	101628	103127
TUB1	YML085C	-0.906995	-0.366202	0.0184188	0.0269127	2N_1N;3N_1N;4N_1N	cell cycle process;cellular component assembly;cellular component assembly at cellular level;cellular component movement;cellular component organization;cellular component organization at cellular level;cellular component organization or biogenesis;cellular component organization or biogenesis at cellular level;cellular macromolecular complex assembly;cellular macromolecular complex subunit organ…	cell part;cytoplasmic microtubule;cytoplasmic part;cytoskeletal part;intracellular organelle part;intracellular part;kinetochore microtubule;macromolecular complex;microtubule;microtubule organizing center;nuclear microtubule;nuclear part;organelle part;polar microtubule;protein complex;spindle microtubule;spindle pole body;tubulin complex	46689000000	24850000000	21839000000	2.12071	0.00587544	0.849375	4.98444	2.80094	0.00141905	1.30686	7.63384	2.95352	0.000114558	1.40865	8.37267	7.87516	0.0546492	P09733	P09733	Tubulin alpha-1 chain	XIII	97941	99400
TUB3	YML124C	-0.143944	-0.113538	0.160965	0.196104	2N_1N;3N_1N;4N_1N	cell cycle process;cellular component assembly;cellular component assembly at cellular level;cellular component movement;cellular component organization;cellular component organization at cellular level;cellular component organization or biogenesis;cellular component organization or biogenesis at cellular level;cellular macromolecular complex assembly;cellular macromolecular complex subunit organ…	cell part;cytoplasmic microtubule;cytoplasmic part;cytoskeletal part;intracellular organelle part;intracellular part;kinetochore microtubule;macromolecular complex;microtubule;microtubule organizing center;nuclear microtubule;nuclear part;organelle part;protein complex;spindle microtubule;spindle pole body;tubulin complex	7940700000	4565700000	3375000000	1.31499	0.0261081	0.552432	2.80794	1.97293	0.00386924	0.84391	4.52188	1.9002	0.00246239	1.11543	4.30624	5.18813	0.044304	P09734	P09734	Tubulin alpha-3 chain	XIII	22048	23683
TRL1	YJL087C	-0.839945	0.0267711	0.261881	-0.0427441	3N_1N;4N_1N	biological regulation;cellular macromolecule metabolic process;cellular metabolic process;cellular nitrogen compound metabolic process;cellular process;cellular response to stimulus;cellular response to stress;macromolecule metabolic process;metabolic process;mRNA metabolic process;mRNA processing;ncRNA metabolic process;ncRNA processing;nitrogen compound metabolic process;nucleic acid metabolic …	cell part;intracellular organelle part;intracellular part;membrane;nuclear inner membrane;nuclear membrane;nuclear part;organelle inner membrane;organelle membrane;organelle part	9389800000	5462800000	3927000000	1.03769	0.0521193	1.07211	2.20941	1.35377	0.013023	1.36272	2.89629	1.1018	0.0236774	1.11137	2.34316	3.49326	0.0765572	P09880	P09880	tRNA ligase	X	270002	272485
RNR2	YJL026W	-1.26033	-1.14937	-0.251196	-0.703949	2N_1N;3N_1N;4N_1N	biosynthetic process;cellular biosynthetic process;cellular macromolecule biosynthetic process;cellular macromolecule metabolic process;cellular metabolic process;cellular nitrogen compound biosynthetic process;cellular nitrogen compound metabolic process;cellular process;deoxyribonucleoside diphosphate metabolic process;deoxyribonucleotide biosynthetic process;deoxyribonucleotide metabolic proce…	cell part;cytoplasm;cytoplasmic part;intracellular membrane-bounded organelle;intracellular organelle;intracellular part;macromolecular complex;membrane-bounded organelle;nucleus;organelle;protein complex;ribonucleoside-diphosphate reductase complex	215180000000	101210000000	113970000000	2.61969	0.00265177	0.413097	6.83212	5.034	0	1.38611	28.3229	4.08145	0	1.04503	16.3003	11.7351	0.143843	P09938	P09938	Ribonucleoside-diphosphate reductase small chain 1	X	392404	393603
HEM1	YDR232W	-0.648569	-0.463271	0.154404	0.213602	2N_1N;3N_1N;4N_1N	biosynthetic process;cellular aromatic compound metabolic process;cellular biosynthetic process;cellular metabolic process;cellular nitrogen compound biosynthetic process;cellular nitrogen compound metabolic process;cellular process;cofactor biosynthetic process;cofactor metabolic process;heme biosynthetic process;heme metabolic process;heterocycle biosynthetic process;heterocycle metabolic proce…	cell part;cytoplasmic part;intracellular organelle lumen;intracellular organelle part;intracellular part;membrane-enclosed lumen;mitochondrial matrix;mitochondrial part;organelle lumen;organelle part	41961000000	22847000000	19114000000	1.44215	0.0186058	0.490738	3.10264	2.73261	0.00163303	1.07972	7.32235	3.07262	0.000123552	1.29518	8.99396	7.24738	0.0496475	P09950	P09950	5-aminolevulinate synthase. mitochondrial	IV	927452	929098
SWI6	YLR182W	-0.0853403	0.217381	-0.161009	-0.0574642	2N_1N;3N_1N;4N_1N	biological regulation;cell cycle process;cellular process;positive regulation of biological process;positive regulation of biosynthetic process;positive regulation of cell cycle process;positive regulation of cellular biosynthetic process;positive regulation of cellular metabolic process;positive regulation of cellular process;positive regulation of DNA metabolic process;positive regulation of DN…	cell part;cytoplasm;intracellular membrane-bounded organelle;intracellular organelle;intracellular organelle part;intracellular part;macromolecular complex;MBF transcription complex;membrane-bounded organelle;nuclear part;nucleoplasm part;nucleus;organelle;organelle part;protein complex;SBF transcription complex;transcription factor complex	14220000000	7502100000	6717500000	2.42091	0.0032	0.569233	6.0379	1.3063	0.014522	0.331207	2.78831	1.49757	0.00866943	0.394078	3.2358	5.22478	0.0441796	P09959	P09959	Regulatory protein SWI6	XII	517940	520351
RPS21B;RPS21A	YJL136C;YKR057W	1.34363	0.519843	0.0984247	-0.235798	3N_1N;4N_1N	biosynthetic process;cellular biosynthetic process;cellular macromolecule biosynthetic process;cellular macromolecule metabolic process;cellular metabolic process;cellular nitrogen compound metabolic process;cellular process;cellular protein metabolic process;cleavage involved in rRNA processing;cytoplasmic translation;endonucleolytic cleavage in ITS1 to separate SSU-rRNA from 5.8S rRNA and LSU-r…	cell part;cytosolic small ribosomal subunit;intracellular organelle part;intracellular part;macromolecular complex;organelle part;ribonucleoprotein complex;small ribosomal subunit	356040000000	197810000000	158230000000	0.605296	0.190333	-0.347504	-1.3507	1.2667	0.0159863	-0.671047	-2.69968	1.67154	0.00553982	-0.915375	-3.67464	3.54354	0.0743207	Q3E754;P0C0V8	Q3E754;P0C0V8	40S ribosomal protein S21-B;40S ribosomal protein S21-A
RPS22B;RPS22A	YJL190C;YLR367W	1.497	0.560826	0.157444	-0.293013	2N_1N;3N_1N;4N_1N	biosynthetic process;cellular biosynthetic process;cellular macromolecule biosynthetic process;cellular macromolecule metabolic process;cellular metabolic process;cellular process;cellular protein metabolic process;cytoplasmic translation;macromolecule biosynthetic process;macromolecule metabolic process;metabolic process;primary metabolic process;protein metabolic process;translation	cell part;cytosolic small ribosomal subunit;intracellular organelle part;intracellular part;macromolecular complex;organelle part;ribonucleoprotein complex;small ribosomal subunit	228170000000	130770000000	97403000000	3.33301	0.00105983	-0.647298	-10.5037	4.07181	0	-1.00158	-16.209	4.78133	0	-1.329	-24.4718	12.1862	0.164609	Q3E7Y3;P0C0W1	Q3E7Y3;P0C0W1	40S ribosomal protein S22-B;40S ribosomal protein S22-A
RPL11B;RPL11A	YGR085C;YPR102C	1.30444	0.38576	0.134809	-0.0848042	2N_1N;3N_1N;4N_1N	biosynthetic process;cellular biosynthetic process;cellular component assembly;cellular component assembly at cellular level;cellular component organization;cellular component organization at cellular level;cellular component organization or biogenesis;cellular component organization or biogenesis at cellular level;cellular macromolecular complex assembly;cellular macromolecular complex subunit o…	cell part;cytosolic large ribosomal subunit;intracellular membrane-bounded organelle;intracellular organelle;intracellular organelle part;intracellular part;large ribosomal subunit;macromolecular complex;membrane-bounded organelle;nucleus;organelle;organelle part;ribonucleoprotein complex	842660000000	485430000000	357230000000	2.56908	0.00271631	-0.519027	-6.6219	3.08179	0.000670588	-0.70413	-9.04346	3.28865	0.000145897	-0.810282	-10.2308	8.93952	0.0679944	Q3E757;P0C0W9	Q3E757;P0C0W9	60S ribosomal protein L11-B;60S ribosomal protein L11-A
RPL27A;RPL27B	YDR471W;YHR010W	1.07109	0.372241	0.0453284	-0.207015	2N_1N;3N_1N;4N_1N	biosynthetic process;cellular biosynthetic process;cellular macromolecule biosynthetic process;cellular macromolecule metabolic process;cellular metabolic process;cellular process;cellular protein metabolic process;cytoplasmic translation;macromolecule biosynthetic process;macromolecule metabolic process;metabolic process;primary metabolic process;protein metabolic process;translation	cell part;cytosolic large ribosomal subunit;intracellular organelle part;intracellular part;large ribosomal subunit;macromolecular complex;organelle part;preribosome;preribosome. large subunit precursor;ribonucleoprotein complex	1494600000000	847800000000	646850000000	1.85121	0.00961636	-0.338853	-4.16518	2.87935	0.00122264	-0.607318	-8.00583	3.307	0.000147465	-0.771127	-10.3428	8.03756	0.056063	P0C2H6;P0C2H7	P0C2H6;P0C2H7	60S ribosomal protein L27-A;60S ribosomal protein L27-B
RPL31A	YDL075W	1.12818	0.50796	0.0644108	-0.178682	2N_1N;3N_1N;4N_1N	biological regulation;biosynthetic process;cellular biosynthetic process;cellular macromolecule biosynthetic process;cellular macromolecule metabolic process;cellular metabolic process;cellular process;cellular protein metabolic process;cytoplasmic translation;macromolecule biosynthetic process;macromolecule metabolic process;metabolic process;posttranscriptional regulation of gene expression;pri…	cell part;cytosolic large ribosomal subunit;intracellular organelle part;intracellular part;large ribosomal subunit;macromolecular complex;organelle part;ribonucleoprotein complex	726930000000	420730000000	306200000000	1.83717	0.00985921	-0.34452	-4.12534	3.04801	0.000652361	-0.727228	-8.86218	3.36353	0.000154589	-0.844398	-10.6954	8.2487	0.0588029	P0C2H8	P0C2H8	60S ribosomal protein L31-A	IV	322226	322988
RPL31B	YLR406C	1.42202	0.472887	0.0114928	-0.284256	2N_1N;3N_1N;4N_1N	biological regulation;biosynthetic process;cellular biosynthetic process;cellular macromolecule biosynthetic process;cellular macromolecule metabolic process;cellular metabolic process;cellular process;cellular protein metabolic process;cytoplasmic translation;macromolecule biosynthetic process;macromolecule metabolic process;metabolic process;posttranscriptional regulation of gene expression;pri…	cell part;cytosolic large ribosomal subunit;intracellular organelle part;intracellular part;large ribosomal subunit;macromolecular complex;organelle part;ribonucleoprotein complex	54255000000	30996000000	23259000000	2.54289	0.00267365	-0.653687	-6.51531	3.18977	0.000745098	-1.0155	-9.64623	3.69415	0	-1.24446	-12.9969	9.42682	0.0765895	P0C2H9	P0C2H9	60S ribosomal protein L31-B	XII	931065	931755
TY1B-LR4		0.875735	0.803138	0.286968	-0.239899	2N_1N;3N_1N;4N_1N	cellular macromolecule metabolic process;cellular metabolic process;cellular nitrogen compound metabolic process;cellular process;DNA integration;DNA metabolic process;DNA recombination;macromolecule metabolic process;metabolic process;nitrogen compound metabolic process;nucleic acid metabolic process;nucleobase-containing compound metabolic process;primary metabolic process;release of virus from…	cell part;cytoplasm;intracellular membrane-bounded organelle;intracellular organelle;intracellular part;membrane-bounded organelle;nucleus;organelle	17309000000	10322000000	6987100000	2.22918	0.00473711	0.31257	5.34647	1.09114	0.0266502	-0.156452	-2.32075	2.67062	0.000302115	-0.609645	-7.04954	5.99094	0.0438906	P0C2I7	P0C2I7	Transposon Ty1-LR4 Gag-Pol polyprotein;Capsid protein;Ty1 protease;Integrase;Reverse transcriptase/ribonuclease H
TY1B-PR1	YPR137C-B	0.731137	0.549236	0.332489	0.034262	2N_1N;4N_1N	biosynthetic process;cellular biosynthetic process;cellular macromolecule biosynthetic process;cellular macromolecule metabolic process;cellular metabolic process;cellular nitrogen compound metabolic process;cellular process;DNA biosynthetic process;DNA integration;DNA metabolic process;DNA recombination;DNA replication;macromolecule biosynthetic process;macromolecule metabolic process;metabolic …	cell part;cytoplasm;intracellular membrane-bounded organelle;intracellular organelle;intracellular organelle part;intracellular part;membrane-bounded organelle;nuclear part;nucleus;organelle;organelle part;retrotransposon nucleocapsid	576620000000	337040000000	239570000000	2.37145	0.00359232	0.187457	5.85288	0.508991	0.192935	0.0271843	1.16226	2.97087	0.000116646	-0.184158	-8.4607	5.85132	0.0438807	P0C2I9	P0C2I9	Transposon Ty1-PR1 Gag-Pol polyprotein;Capsid protein;Ty1 protease;Integrase;Reverse transcriptase/ribonuclease H	XVI	805001	810269
TY1B-PR2;TY1B-DR5	YDR316W-B;YPR158W-B	1.62536	1.04369	0.476088	0.104273	3N_1N;4N_1N	biosynthetic process;cellular biosynthetic process;cellular macromolecule biosynthetic process;cellular macromolecule metabolic process;cellular metabolic process;cellular nitrogen compound metabolic process;cellular process;DNA biosynthetic process;DNA integration;DNA metabolic process;DNA recombination;DNA replication;macromolecule biosynthetic process;macromolecule metabolic process;metabolic …	cell part;cytoplasm;intracellular membrane-bounded organelle;intracellular organelle;intracellular organelle part;intracellular part;membrane-bounded organelle;nuclear part;nucleus;organelle;organelle part;retrotransposon nucleocapsid	24533000000	15902000000	8631500000	0.540154	0.237645	-0.131782	-1.22346	2.42485	0.00193208	-0.685253	-6.05283	2.76591	0.000101587	-0.960066	-7.4727	5.73091	0.04374	P0C2J0;P0C2I2	P0C2J0;P0C2I2	Transposon Ty1-PR2 Gag-Pol polyprotein;Capsid protein;Ty1 protease;Integrase;Reverse transcriptase/ribonuclease H;Transposon Ty1-DR5 Gag-Pol polyprotein;Capsid protein;Ty1 protease;Integrase;Reverse transcriptase/ribonuclease H
TY1B-PR3	YPR158C-D	NaN	1.01715	-0.0271849	-0.266497		biosynthetic process;cellular biosynthetic process;cellular macromolecule biosynthetic process;cellular macromolecule metabolic process;cellular metabolic process;cellular nitrogen compound metabolic process;cellular process;DNA biosynthetic process;DNA integration;DNA metabolic process;DNA recombination;DNA replication;macromolecule biosynthetic process;macromolecule metabolic process;metabolic …	cell part;cytoplasm;intracellular membrane-bounded organelle;intracellular organelle;intracellular organelle part;intracellular part;membrane-bounded organelle;nuclear part;nucleus;organelle;organelle part;retrotransposon nucleocapsid	972620000	626580000	346040000	0	0.955925	NaN	0	0	0.956845	NaN	0	0	1	NaN	0	0	0.995801	P0C2J1	P0C2J1	Transposon Ty1-PR3 Gag-Pol polyprotein;Capsid protein;Ty1 protease;Integrase;Reverse transcriptase/ribonuclease H	XVI	850989	856257
TY2B-GR1;TY2B-GR2;TY2B-F;TY2B-LR1;TY2B-OR2;TY2B-DR1;TY2B-DR2;TY2B-C;TY2B-B;TY2B-OR1;TY2B-LR2	YBL100W-B;YCL019W;YDR034C-D;YDR210W-B;YFL002W-A;YGR161W-B;YLR410W-B;YOR192C-B	0.667994	0.255247	-0.147953	-1.10327	4N_1N	biosynthetic process;cellular biosynthetic process;cellular macromolecule biosynthetic process;cellular macromolecule metabolic process;cellular metabolic process;cellular nitrogen compound metabolic process;cellular process;DNA biosynthetic process;DNA integration;DNA metabolic process;DNA recombination;DNA replication;macromolecule biosynthetic process;macromolecule metabolic process;metabolic …	cell part;cytoplasm;intracellular membrane-bounded organelle;intracellular organelle;intracellular organelle part;intracellular part;membrane-bounded organelle;nuclear part;nucleus;organelle;organelle part;retrotransposon nucleocapsid	7706700000	3969200000	3737500000	0.0274442	0.979852	-0.0198054	-0.0817636	0.771005	0.072928	-0.358122	-1.67406	2.31354	0.00044188	-1.2013	-5.64225	3.11199	0.098006	Q12337;P0CX64;P0CX63;P0C2J3;Q12501;Q12472;Q03494;P25384;Q12491;Q12113;P0C2J5;P0C2J2;Q03483	Q12337;P0CX64;P0CX63;P0C2J3;Q12501;Q12472;Q03494;P25384;Q12491;Q12113;P0C2J5	Transposon Ty2-GR1 Gag-Pol polyprotein;Capsid protein;Ty2 protease;Integrase;Reverse transcriptase/ribonuclease H;Transposon Ty2-GR2 Gag-Pol polyprotein;Capsid protein;Ty2 protease;Integrase;Reverse transcriptase/ribonuclease H;Transposon Ty2-F Gag-Pol polyprotein;Capsid protein;Ty2 protease;Integrase;Reverse transcriptase/ribonuclease H;Transposon Ty2-LR1 Gag-Pol polyprotein;Capsid protein;Ty2 p…
YGL041W-A	YGL041W-A	1.20152	0.370933	-0.010858	-0.264384	2N_1N;3N_1N;4N_1N		cell part;cytoplasmic part;intracellular membrane-bounded organelle;intracellular organelle;intracellular part;membrane-bounded organelle;mitochondrion;organelle	9593600000	5330900000	4262700000	2.35676	0.00351954	-0.531585	-5.79884	2.81946	0.00143097	-0.844506	-7.72029	3.50309	0.000175182	-1.00977	-11.615	8.67931	0.0635844	P0C5N3	P0C5N3	Uncharacterized protein YGL041W-A. mitochondrial	VII	418825	419289
RPL40B;RPL40A	YIL148W;YKR094C	1.50595	0.548334	0.124984	-0.408141	2N_1N;3N_1N	biosynthetic process;cellular biosynthetic process;cellular component assembly;cellular component assembly at cellular level;cellular component biogenesis;cellular component biogenesis at cellular level;cellular component organization;cellular component organization at cellular level;cellular component organization or biogenesis;cellular component organization or biogenesis at cellular level;cell…	cell part;cytosolic large ribosomal subunit;intracellular membrane-bounded organelle;intracellular organelle;intracellular organelle part;intracellular part;large ribosomal subunit;macromolecular complex;membrane-bounded organelle;nucleus;organelle;organelle part;ribonucleoprotein complex	12578000000	7442000000	5135600000	2.36739	0.00355556	-0.678993	-5.83791	2.55801	0.00154379	-1.05046	-6.57664	0	1	-1.50577	0	4.9254	0.0457932	P0CH09;P0CH08	P0CH09;P0CH08	Ubiquitin-60S ribosomal protein L40;Ubiquitin;60S ribosomal protein L40
SSC1	YJR045C	0.14175	0.108046	-0.0394192	-0.353447	2N_1N;3N_1N	biological regulation;cellular macromolecule metabolic process;cellular metabolic process;cellular process;cellular protein metabolic process;establishment of localization;establishment of localization in cell;establishment of protein localization;establishment of protein localization in mitochondrion;establishment of protein localization to organelle;intracellular protein transmembrane transport…	cell part;cytoplasmic part;intracellular membrane-bounded organelle;intracellular non-membrane-bounded organelle;intracellular organelle;intracellular organelle part;intracellular part;macromolecular complex;membrane;membrane part;membrane-bounded organelle;mitochondrial inner membrane;mitochondrial membrane;mitochondrial membrane part;mitochondrial nucleoid;mitochondrial part;non-membrane-bounde…	1224900000000	630900000000	594030000000	2.80195	0.00222022	0.322504	7.63852	2.22828	0.00310628	0.243438	5.3434	0.0106585	1	-0.00158215	-0.0323316	5.04089	0.0451859	P0CS90	P0CS90	Heat shock protein SSC1. mitochondrial	X	519638	521602
PBI2	YNL015W	1.18013	0.0886543	-0.634352	-0.85353	2N_1N;3N_1N;4N_1N	biological regulation;cellular component organization;cellular component organization at cellular level;cellular component organization or biogenesis;cellular component organization or biogenesis at cellular level;cellular membrane fusion;cellular membrane organization;cellular process;establishment of localization;establishment of protein localization;membrane fusion;membrane organization;negati…	cell part;cytoplasmic part;fungal-type vacuole;intracellular membrane-bounded organelle;intracellular organelle;intracellular part;lytic vacuole;membrane-bounded organelle;nucleus;organelle;storage vacuole;vacuole	130600000000	65752000000	64844000000	3.36636	0.000553571	-0.80544	-10.7133	4.64829	0	-1.4354	-22.6571	4.67559	0	-1.52571	-23.0184	12.6902	0.186478	P0CT04	P0CT04	Protease B inhibitor 2	XIV	605384	605611
RPL20B;RPL20A	YMR242C;YOR312C	1.22176	0.20474	0.217306	-0.042602	2N_1N;3N_1N;4N_1N	biosynthetic process;cellular biosynthetic process;cellular macromolecule biosynthetic process;cellular macromolecule metabolic process;cellular metabolic process;cellular process;cellular protein metabolic process;cytoplasmic translation;macromolecule biosynthetic process;macromolecule metabolic process;metabolic process;primary metabolic process;protein metabolic process;translation	cell part;cytosolic large ribosomal subunit;intracellular organelle part;intracellular part;large ribosomal subunit;macromolecular complex;organelle part;ribonucleoprotein complex	242290000000	137970000000	104320000000	1.98839	0.00730453	-0.568659	-4.5687	1.67016	0.00669382	-0.475368	-3.67104	2.21579	0.000608076	-0.653495	-5.30068	5.87434	0.0437493	P0CX24;P0CX23	P0CX24;P0CX23	60S ribosomal protein L20-B;60S ribosomal protein L20-A
RPL43B;RPL43A	YJR094W-A;YPR043W	1.09531	0.421651	0.178002	-0.20765	2N_1N;3N_1N;4N_1N	biosynthetic process;cellular biosynthetic process;cellular macromolecule biosynthetic process;cellular macromolecule metabolic process;cellular metabolic process;cellular process;cellular protein metabolic process;cytoplasmic translation;macromolecule biosynthetic process;macromolecule metabolic process;metabolic process;primary metabolic process;protein metabolic process;translation	cell part;cytosolic large ribosomal subunit;intracellular organelle part;intracellular part;large ribosomal subunit;macromolecular complex;organelle part;ribonucleoprotein complex	152400000000	82200000000	70204000000	1.88889	0.00861569	-0.31736	-4.27336	2.54333	0.00153286	-0.558624	-6.51707	3.75819	0	-0.831685	-13.4943	8.1904	0.0580796	P0CX26;P0CX25	P0CX26;P0CX25	60S ribosomal protein L43-B;60S ribosomal protein L43-A
RPL42B;RPL42A	YHR141C;YNL162W	1.33319	0.531065	0.102172	-0.242998	2N_1N;3N_1N;4N_1N	biosynthetic process;cellular biosynthetic process;cellular macromolecule biosynthetic process;cellular macromolecule metabolic process;cellular metabolic process;cellular process;cellular protein metabolic process;cytoplasmic translation;macromolecule biosynthetic process;macromolecule metabolic process;metabolic process;primary metabolic process;protein metabolic process;response to antibiotic;…	cell part;cytosolic large ribosomal subunit;intracellular organelle part;intracellular part;large ribosomal subunit;macromolecular complex;organelle part;ribonucleoprotein complex	404670000000	222240000000	182430000000	2.63852	0.00268679	-0.450113	-6.91181	3.348	0.000649254	-0.778808	-10.5974	3.94849	0	-1.05664	-15.0836	9.935	0.0887172	P0CX28;P0CX27	P0CX28;P0CX27	60S ribosomal protein L42-B;60S ribosomal protein L42-A
RPS23B;RPS23A	YGR118W;YPR132W	1.28332	0.499288	0.125746	-0.263652	2N_1N;3N_1N;4N_1N	biological regulation;biosynthetic process;cellular biosynthetic process;cellular macromolecule biosynthetic process;cellular macromolecule metabolic process;cellular metabolic process;cellular nitrogen compound metabolic process;cellular process;cellular protein metabolic process;macromolecule biosynthetic process;macromolecule metabolic process;maturation of SSU-rRNA;maturation of SSU-rRNA from…	cell part;cytosolic small ribosomal subunit;intracellular organelle part;intracellular part;macromolecular complex;organelle part;ribonucleoprotein complex;small ribosomal subunit	593690000000	333300000000	260390000000	1.58351	0.0145117	-0.441246	-3.44847	2.41782	0.0024338	-0.768285	-6.02621	2.89213	0.000110092	-1.03466	-8.06798	6.89346	0.0471297	P0CX30;P0CX29	P0CX30;P0CX29	40S ribosomal protein S23-B;40S ribosomal protein S23-A
RPS24B;RPS24A	YER074W;YIL069C	1.25137	0.413656	0.0450454	-0.244607	2N_1N;3N_1N;4N_1N	biosynthetic process;cellular biosynthetic process;cellular macromolecule biosynthetic process;cellular macromolecule metabolic process;cellular metabolic process;cellular nitrogen compound metabolic process;cellular process;cellular protein metabolic process;cytoplasmic translation;macromolecule biosynthetic process;macromolecule metabolic process;maturation of SSU-rRNA;maturation of SSU-rRNA fr…	cell part;cytosolic small ribosomal subunit;intracellular organelle part;intracellular part;macromolecular complex;organelle part;ribonucleoprotein complex;small ribosomal subunit	556610000000	318230000000	238380000000	3.65729	0.000885714	-0.527356	-12.7185	4.49011	0	-0.840342	-20.6718	4.82414	0	-1.04065	-25.0857	12.9715	0.203145	P0CX32;P0CX31	P0CX32;P0CX31	40S ribosomal protein S24-B;40S ribosomal protein S24-A
RPS30B;RPS30A	YLR287C-A;YOR182C	1.3333	0.245738	-0.0323317	-0.40039	2N_1N;3N_1N;4N_1N	biosynthetic process;cellular biosynthetic process;cellular macromolecule biosynthetic process;cellular macromolecule metabolic process;cellular metabolic process;cellular process;cellular protein metabolic process;cytoplasmic translation;macromolecule biosynthetic process;macromolecule metabolic process;metabolic process;primary metabolic process;protein metabolic process;translation	cell part;cytoplasmic part;cytosolic small ribosomal subunit;intracellular non-membrane-bounded organelle;intracellular organelle;intracellular organelle part;intracellular part;macromolecular complex;non-membrane-bounded organelle;organelle;organelle part;ribonucleoprotein complex;RNA granule;small ribosomal subunit;stress granule	32292000000	17154000000	15138000000	1.94792	0.00797119	-0.714416	-4.44687	1.81385	0.00516667	-1.24239	-4.05979	2.02718	0.00156749	-1.42791	-4.68776	5.78896	0.0438109	P0CX34;P0CX33	P0CX34;P0CX33	40S ribosomal protein S30-B;40S ribosomal protein S30-A
RPS4B;RPS4A	YHR203C;YJR145C	0.205572	0.065943	0.337746	0.0315634	2N_1N;3N_1N;4N_1N	biosynthetic process;cellular biosynthetic process;cellular macromolecule biosynthetic process;cellular macromolecule metabolic process;cellular metabolic process;cellular process;cellular protein metabolic process;cytoplasmic translation;macromolecule biosynthetic process;macromolecule metabolic process;metabolic process;primary metabolic process;protein metabolic process;translation	cell part;cytosolic small ribosomal subunit;intracellular organelle part;intracellular part;macromolecular complex;organelle part;ribonucleoprotein complex;small ribosomal subunit	529720000000	292530000000	237190000000	1.2343	0.0322133	0.259813	2.62807	2.41817	0.00243609	0.584696	6.02752	1.7844	0.00394203	0.39589	3.97801	5.43688	0.0437779	P0CX36;P0CX35	P0CX36;P0CX35	40S ribosomal protein S4-B;40S ribosomal protein S4-A
RPS6B;RPS6A	YBR181C;YPL090C	0.867303	0.482593	0.192874	-0.0800985	3N_1N;4N_1N	biosynthetic process;cellular biosynthetic process;cellular macromolecule biosynthetic process;cellular macromolecule metabolic process;cellular metabolic process;cellular nitrogen compound metabolic process;cellular process;cellular protein metabolic process;cytoplasmic translation;macromolecule biosynthetic process;macromolecule metabolic process;maturation of SSU-rRNA;maturation of SSU-rRNA fr…	cell part;cytosolic small ribosomal subunit;intracellular non-membrane-bounded organelle;intracellular organelle;intracellular organelle part;intracellular part;macromolecular complex;non-membrane-bounded organelle;nuclear part;nucleolus;organelle;organelle part;preribosome;ribonucleoprotein complex;small ribosomal subunit;small-subunit processome	618880000000	357690000000	261190000000	0.0887022	0.898707	-0.0192015	-0.2495	1.74484	0.00589218	-0.267823	-3.86989	2.47999	0.000385933	-0.44038	-6.26526	4.31353	0.0523529	P0CX38;P0CX37	P0CX38;P0CX37	40S ribosomal protein S6-B;40S ribosomal protein S6-A
RPS8B;RPS8A	YBL072C;YER102W	0.999174	0.382847	0.214742	-0.0636471	3N_1N;4N_1N	biosynthetic process;cellular biosynthetic process;cellular macromolecule biosynthetic process;cellular macromolecule metabolic process;cellular metabolic process;cellular nitrogen compound metabolic process;cellular process;cellular protein metabolic process;cytoplasmic translation;macromolecule biosynthetic process;macromolecule metabolic process;maturation of SSU-rRNA;maturation of SSU-rRNA fr…	cell part;cytosolic small ribosomal subunit;intracellular organelle part;intracellular part;macromolecular complex;organelle part;ribonucleoprotein complex;small ribosomal subunit	531560000000	314070000000	217490000000	0.839636	0.0934036	-0.207107	-1.8093	1.26232	0.0162752	-0.30865	-2.68994	1.84195	0.00314825	-0.48232	-4.13887	3.9439	0.059828	P0CX40;P0CX39	P0CX40;P0CX39	40S ribosomal protein S8-B;40S ribosomal protein S8-A
RPL23B;RPL23A	YBL087C;YER117W	1.23294	0.571301	0.164356	-0.190673	2N_1N;3N_1N;4N_1N	biosynthetic process;cellular biosynthetic process;cellular macromolecule biosynthetic process;cellular macromolecule metabolic process;cellular metabolic process;cellular process;cellular protein metabolic process;cytoplasmic translation;macromolecule biosynthetic process;macromolecule metabolic process;metabolic process;primary metabolic process;protein metabolic process;translation	cell part;cytoplasmic part;cytosol;cytosolic large ribosomal subunit;intracellular membrane-bounded organelle;intracellular organelle;intracellular organelle part;intracellular part;large ribosomal subunit;macromolecular complex;membrane-bounded organelle;nucleus;organelle;organelle part;ribonucleoprotein complex	45664000000	27103000000	18561000000	2.17057	0.00547654	-0.385243	-5.14839	3.15729	0.00072381	-0.655802	-9.46114	4.02228	0	-0.974797	-15.7475	9.35015	0.0749288	P0CX42;P0CX41	P0CX42;P0CX41	60S ribosomal protein L23-B;60S ribosomal protein L23-A
RPL1B;RPL1A	YGL135W;YPL220W	0.0107398	0.298663	0.268058	0.0808972	2N_1N;3N_1N;4N_1N	biosynthetic process;cellular biosynthetic process;cellular macromolecule biosynthetic process;cellular macromolecule metabolic process;cellular metabolic process;cellular process;cellular protein metabolic process;cytoplasmic translation;macromolecule biosynthetic process;macromolecule metabolic process;metabolic process;primary metabolic process;protein metabolic process;translation	cell part;cytosolic large ribosomal subunit;intracellular organelle part;intracellular part;large ribosomal subunit;macromolecular complex;organelle part;ribonucleoprotein complex	540800000000	310380000000	230420000000	2.36322	0.00354519	0.565241	5.82256	3.34898	0.000654135	0.696333	10.6036	3.30839	0.000147692	0.613462	10.3514	9.02059	0.0690511	P0CX44;P0CX43	P0CX44;P0CX43	60S ribosomal protein L1-B;60S ribosomal protein L1-A
RPL2B;RPL2A	YFR031C-A;YIL018W	0.723045	0.367018	0.190385	-0.0633665	3N_1N;4N_1N	biosynthetic process;cellular biosynthetic process;cellular macromolecule biosynthetic process;cellular macromolecule metabolic process;cellular metabolic process;cellular process;cellular protein metabolic process;cytoplasmic translation;macromolecule biosynthetic process;macromolecule metabolic process;metabolic process;primary metabolic process;protein metabolic process;translation	cell part;cytosolic large ribosomal subunit;intracellular organelle part;intracellular part;large ribosomal subunit;macromolecular complex;organelle part;ribonucleoprotein complex	310140000000	181880000000	128270000000	0.284024	0.584723	-0.041577	-0.704517	2.27757	0.00292573	-0.137034	-5.51456	2.4278	0.000377758	-0.293896	-6.06403	4.98939	0.0454545	P0CX46;P0CX45	P0CX46;P0CX45	60S ribosomal protein L2-B;60S ribosomal protein L2-A
RPS11B;RPS11A	YBR048W;YDR025W	1.09245	0.450688	0.186651	-0.143162	2N_1N;3N_1N;4N_1N	biosynthetic process;cellular biosynthetic process;cellular component assembly;cellular component assembly at cellular level;cellular component organization;cellular component organization at cellular level;cellular component organization or biogenesis;cellular component organization or biogenesis at cellular level;cellular macromolecular complex assembly;cellular macromolecular complex subunit o…	cell part;cytosolic small ribosomal subunit;intracellular organelle part;intracellular part;macromolecular complex;organelle part;ribonucleoprotein complex;small ribosomal subunit	963690000000	544240000000	419440000000	2.29479	0.00390786	-0.278055	-5.5754	3.40787	0.000683694	-0.50666	-10.9798	4.00228	0	-0.723828	-15.5648	9.70495	0.0818776	P0CX48;P0CX47	P0CX48;P0CX47	40S ribosomal protein S11-B;40S ribosomal protein S11-A
RPL18B;RPL18A	YNL301C;YOL120C	0.390101	-0.00758357	0.22104	0.0877641	3N_1N	biosynthetic process;cellular biosynthetic process;cellular macromolecule biosynthetic process;cellular macromolecule metabolic process;cellular metabolic process;cellular process;cellular protein metabolic process;cytoplasmic translation;macromolecule biosynthetic process;macromolecule metabolic process;metabolic process;primary metabolic process;protein metabolic process;translation	cell part;cytosolic large ribosomal subunit;intracellular organelle part;intracellular part;large ribosomal subunit;macromolecular complex;organelle part;ribonucleoprotein complex	423150000000	243130000000	180020000000	0.146528	0.818264	-0.0505414	-0.394081	0.93552	0.0422575	0.25553	2.00084	0.763341	0.0663661	0.211539	1.65903	1.84539	0.262244	P0CX50;P0CX49	P0CX50;P0CX49	60S ribosomal protein L18-B;60S ribosomal protein L18-A
RPS16B;RPS16A	YDL083C;YMR143W	0.872379	0.416807	0.0704441	-0.183593	3N_1N;4N_1N	biosynthetic process;cellular biosynthetic process;cellular macromolecule biosynthetic process;cellular macromolecule metabolic process;cellular metabolic process;cellular nitrogen compound metabolic process;cellular process;cellular protein metabolic process;cytoplasmic translation;DNA metabolic process;DNA recombination;macromolecule biosynthetic process;macromolecule metabolic process;maturati…	cell part;cytosolic small ribosomal subunit;intracellular organelle part;intracellular part;macromolecular complex;organelle part;ribonucleoprotein complex;small ribosomal subunit	1002800000000	566200000000	436570000000	0.710414	0.138526	-0.155357	-1.55553	2.10491	0.00331275	-0.470687	-4.93337	2.55352	0.000402634	-0.649295	-6.55838	5.36885	0.0439203	P0CX52;P0CX51	P0CX52;P0CX51	40S ribosomal protein S16-B;40S ribosomal protein S16-A
RPL12B;RPL12A	YDR418W;YEL054C	1.15642	0.47174	0.141342	-0.147534	2N_1N;3N_1N;4N_1N	biosynthetic process;cellular biosynthetic process;cellular component assembly;cellular component assembly at cellular level;cellular component organization;cellular component organization at cellular level;cellular component organization or biogenesis;cellular component organization or biogenesis at cellular level;cellular macromolecular complex assembly;cellular macromolecular complex subunit o…	cell part;cytosolic large ribosomal subunit;intracellular organelle part;intracellular part;large ribosomal subunit;macromolecular complex;organelle part;ribonucleoprotein complex	717060000000	413100000000	303960000000	2.96325	0.0017957	-0.391389	-8.42194	3.74958	0	-0.632273	-13.4264	4.62913	0	-0.854787	-22.407	11.342	0.128075	P0CX54;P0CX53	P0CX54;P0CX53	60S ribosomal protein L12-B;60S ribosomal protein L12-A
RPS18B;RPS18A	YDR450W;YML026C	1.26116	0.440356	0.143763	-0.173104	2N_1N;3N_1N;4N_1N	biosynthetic process;cellular biosynthetic process;cellular macromolecule biosynthetic process;cellular macromolecule metabolic process;cellular metabolic process;cellular nitrogen compound metabolic process;cellular process;cellular protein metabolic process;cleavage involved in rRNA processing;cytoplasmic translation;endonucleolytic cleavage in ITS1 to separate SSU-rRNA from 5.8S rRNA and LSU-r…	cell part;cytosolic small ribosomal subunit;intracellular organelle part;intracellular part;macromolecular complex;organelle part;ribonucleoprotein complex;small ribosomal subunit	1207200000000	676200000000	530970000000	3.22236	0.00125926	-0.446749	-9.83534	3.83335	0	-0.681052	-14.1016	4.61685	0	-0.916256	-22.2482	11.6726	0.140864	P0CX56;P0CX55	P0CX56;P0CX55	40S ribosomal protein S18-B;40S ribosomal protein S18-A
TY1A-GR1;TY1A-ML2;TY1A-LR3;TY1A-JR1;TY1A-GR2	YGR027W-A;YGR038C-A;YJR026W;YLR227W-A;YML040W	1.59004	1.6063	NaN	NaN		cellular process;transposition;transposition. RNA-mediated	cell part;cytoplasm;intracellular organelle part;intracellular part;nuclear part;organelle part;retrotransposon nucleocapsid	1439600000	926690000	512890000	0.784813	0.110704	0.252623	1.8333	0	0.956507	NaN	0	0	1	NaN	0	0.784813	0.692654	Q12085;P0CX76;P0CX75;P0CX74;Q12485	Q12085;P0CX76;P0CX75;P0CX74;Q12485	Transposon Ty1-GR1 Gag polyprotein;Capsid protein;Gag-p4;Transposon Ty1-ML2 Gag polyprotein;Capsid protein;Gag-p4;Transposon Ty1-LR3 Gag polyprotein;Capsid protein;Gag-p4;Transposon Ty1-JR1 Gag polyprotein;Capsid protein;Gag-p4;Transposon Ty1-GR2 Gag polyprotein;Capsid protein;Gag-p4
RPL19B;RPL19A	YBL027W;YBR084C-A	1.01989	0.456512	0.0923026	-0.162145	3N_1N;4N_1N	biosynthetic process;cellular biosynthetic process;cellular macromolecule biosynthetic process;cellular macromolecule metabolic process;cellular metabolic process;cellular process;cellular protein metabolic process;cytoplasmic translation;macromolecule biosynthetic process;macromolecule metabolic process;metabolic process;primary metabolic process;protein metabolic process;translation	cell part;cytosolic large ribosomal subunit;intracellular organelle part;intracellular part;large ribosomal subunit;macromolecular complex;organelle part;ribonucleoprotein complex	515020000000	297610000000	217410000000	1.05464	0.0503639	-0.264761	-2.24452	2.16451	0.00312704	-0.617723	-5.12824	2.56637	0.000406458	-0.750409	-6.61078	5.78551	0.0437054	P0CX83;P0CX82	P0CX83;P0CX82	60S ribosomal protein L19-B;60S ribosomal protein L19-A
RPL35B;RPL35A	YDL136W;YDL191W	0.99086	0.345093	0.0544109	-0.229312	2N_1N;3N_1N;4N_1N	biosynthetic process;cellular biosynthetic process;cellular macromolecule biosynthetic process;cellular macromolecule metabolic process;cellular metabolic process;cellular nitrogen compound metabolic process;cellular process;cellular protein metabolic process;cytoplasmic translation;macromolecule biosynthetic process;macromolecule metabolic process;maturation of LSU-rRNA;maturation of LSU-rRNA fr…	cell part;cytosolic large ribosomal subunit;intracellular organelle part;intracellular part;large ribosomal subunit;macromolecular complex;organelle part;preribosome;preribosome. large subunit precursor;ribonucleoprotein complex	567220000000	311050000000	256170000000	2.78051	0.00217621	-0.309069	-7.53952	4.07442	0	-0.555735	-16.2336	4.66849	0	-0.743205	-22.9239	11.5234	0.136851	P0CX85;P0CX84	P0CX85;P0CX84	60S ribosomal protein L35-B;60S ribosomal protein L35-A
SBP1	YHL034C	0.458351	0.0341444	-0.397209	-0.234304	2N_1N;3N_1N;4N_1N	biological regulation;cellular process;cellular response to stimulus;cellular response to stress;negative regulation of biological process;negative regulation of biosynthetic process;negative regulation of cellular biosynthetic process;negative regulation of cellular macromolecule biosynthetic process;negative regulation of cellular metabolic process;negative regulation of cellular process;negati…	cell part;cytoplasm;cytoplasmic mRNA processing body;cytoplasmic part;intracellular non-membrane-bounded organelle;intracellular organelle;intracellular organelle part;intracellular part;macromolecular complex;non-membrane-bounded organelle;nuclear part;nucleolus;organelle;organelle part;ribonucleoprotein complex;RNA granule;stress granule	211690000000	104240000000	107460000000	1.09736	0.0455892	-0.17115	-2.33382	2.83817	0.00145012	-0.541568	-7.8085	1.52967	0.00806695	-0.232623	-3.31433	5.4652	0.0436827	P10080	P10080	Single-stranded nucleic acid-binding protein	VIII	33193	34077
TIF1	YJL138C;YKR059W	-0.813612	-1.2032	0.301205	0.138706	3N_1N;4N_1N	biological regulation;cellular process;posttranscriptional regulation of gene expression;regulation of biological process;regulation of biosynthetic process;regulation of cellular biosynthetic process;regulation of cellular macromolecule biosynthetic process;regulation of cellular metabolic process;regulation of cellular process;regulation of cellular protein metabolic process;regulation of gene …	cell part;cytoplasm;cytoplasmic part;eukaryotic translation initiation factor 4F complex;intracellular non-membrane-bounded organelle;intracellular organelle;intracellular part;macromolecular complex;non-membrane-bounded organelle;organelle;protein complex;ribonucleoprotein complex;ribosome	325130000000	170830000000	154300000000	0.059237	0.935994	0.0400857	0.171041	2.62831	0.00160593	1.60542	6.86852	2.52204	0.000395564	1.5565	6.43151	5.20959	0.0442488	P10081	P10081	ATP-dependent RNA helicase eIF4A
ADH4	YGL256W	-1.17873	-1.37498	-2.50863	-3.71664	3N_1N;4N_1N	alcohol biosynthetic process;alcohol metabolic process;amine catabolic process;amine metabolic process;amino acid catabolic process to alcohol via Ehrlich pathway;amino acid catabolic process via Ehrlich pathway;biosynthetic process;carboxylic acid catabolic process;carboxylic acid metabolic process;catabolic process;cellular amine metabolic process;cellular amino acid catabolic process;cellular …	cell part;cytoplasmic part;intracellular membrane-bounded organelle;intracellular organelle;intracellular part;membrane-bounded organelle;mitochondrion;organelle	207470000000	39925000000	167540000000	0.0421206	0.958314	0.0168732	0.123634	1.76423	0.00566531	-0.953188	-3.92262	2.09853	0.00131226	-2.43009	-4.91284	3.90488	0.0607158	P10127	P10127	Alcohol dehydrogenase 4	VII	15159	16307
PRI1	YIR008C	-0.128706	0.0573125	-0.0311246	0.28864	2N_1N;3N_1N;4N_1N	biosynthetic process;cellular biosynthetic process;cellular macromolecule biosynthetic process;cellular macromolecule metabolic process;cellular metabolic process;cellular nitrogen compound metabolic process;cellular process;DNA metabolic process;DNA replication;DNA replication. synthesis of RNA primer;DNA strand elongation;DNA strand elongation involved in DNA replication;DNA-dependent DNA repli…	alpha DNA polymerase:primase complex;cell part;chromosomal part;intracellular organelle part;intracellular part;macromolecular complex;nuclear chromosome part;nuclear part;nuclear replication fork;organelle part;protein complex;replication fork	37743000000	22672000000	15071000000	1.64011	0.0133576	0.545096	3.59288	2.62144	0.00160084	0.555862	6.8395	3.48065	0.000172662	0.9407	11.4622	7.7422	0.053138	P10363	P10363	DNA primase small subunit	IX	373077	374306
MAS1	YLR163C	-0.228768	0.0525402	-0.109713	0.0377778	2N_1N;3N_1N;4N_1N	cellular macromolecule metabolic process;cellular metabolic process;cellular process;cellular protein metabolic process;macromolecule metabolic process;metabolic process;mitochondrial protein processing;primary metabolic process;protein maturation;protein metabolic process;protein processing;protein processing involved in protein targeting to mitochondrion	cell part;cytoplasmic part;intracellular organelle lumen;intracellular organelle part;intracellular part;macromolecular complex;membrane-enclosed lumen;mitochondrial matrix;mitochondrial part;mitochondrial processing peptidase complex;organelle lumen;organelle part;protein complex	20661000000	12924000000	7737000000	1.56785	0.0144702	0.536378	3.40913	1.26732	0.0159954	0.428799	2.70104	1.96346	0.00181818	0.718776	4.49336	4.79863	0.0465343	P10507	P10507	Mitochondrial-processing peptidase subunit beta	XII	491866	493254
SSA1	YAL005C	0.248674	0.0282427	-0.374123	-0.66446	3N_1N;4N_1N	biosynthetic process;cellular biosynthetic process;cellular component disassembly;cellular component disassembly at cellular level;cellular component organization;cellular component organization at cellular level;cellular component organization or biogenesis;cellular component organization or biogenesis at cellular level;cellular macromolecular complex disassembly;cellular macromolecular complex …	cell part;cell wall;cytoplasm;cytoplasmic part;external encapsulating structure;extracellular region;fungal-type cell wall;fungal-type vacuole membrane;intracellular membrane-bounded organelle;intracellular organelle;intracellular organelle part;intracellular part;macromolecular complex;membrane;membrane-bounded organelle;nucleus;organelle;organelle membrane;organelle part;polysome;ribonucleoprot…	510460000000	250910000000	259550000000	0.80265	0.104422	0.101584	1.73626	1.57262	0.00819084	-0.198841	-3.42108	2.4208	0.000375439	-0.40244	-6.03746	4.79606	0.0465377	P10591	P10591	Heat shock protein SSA1	I	139503	141431
SSA2	YLL024C	0.00864525	0.173332	0.0393988	0.00279422	2N_1N;3N_1N;4N_1N	cellular macromolecule metabolic process;cellular metabolic process;cellular process;cellular protein metabolic process;establishment of localization;establishment of localization in cell;establishment of protein localization;intracellular protein transmembrane transport;intracellular protein transport;intracellular transport;macromolecule metabolic process;metabolic process;primary metabolic pro…	cell part;cell wall;cytoplasm;cytoplasmic part;cytosol;external encapsulating structure;extracellular region;fungal-type cell wall;fungal-type vacuole membrane;intracellular membrane-bounded organelle;intracellular organelle;intracellular organelle part;intracellular part;macromolecular complex;membrane;membrane-bounded organelle;mitochondrion;organelle;organelle membrane;organelle part;polysome;…	4782500000000	2583600000000	2198900000000	3.2274	0.00126866	0.475199	9.86489	2.86126	0.00135309	0.432965	7.9186	2.95297	0.000114286	0.467201	8.36992	9.04163	0.0694286	P10592	P10592	Heat shock protein SSA2	XII	95566	97485
ERG11	YHR007C	-0.537355	-0.16127	0.148785	0.156284	2N_1N;3N_1N;4N_1N	alcohol biosynthetic process;alcohol metabolic process;biosynthetic process;cellular alcohol biosynthetic process;cellular alcohol metabolic process;cellular biosynthetic process;cellular metabolic process;cellular process;demethylation;ergosterol biosynthetic process;ergosterol metabolic process;lipid biosynthetic process;lipid metabolic process;metabolic process;one-carbon metabolic process;phy…	cell part;cytoplasmic part;endoplasmic reticulum;integral to membrane;intracellular membrane-bounded organelle;intracellular organelle;intracellular part;intrinsic to membrane;membrane part;membrane-bounded organelle;organelle	59770000000	36377000000	23393000000	1.52086	0.015754	0.814589	3.29267	2.66002	0.00163892	1.22549	7.0038	2.78788	0.000103448	1.26515	7.5734	6.96875	0.0476209	P10614	P10614	Lanosterol 14-alpha demethylase	VIII	120091	121683
RPP1B	YDL130W	1.26823	0.53247	0.098498	-0.0955418	2N_1N;3N_1N;4N_1N	biological regulation;biosynthetic process;cellular biosynthetic process;cellular macromolecule biosynthetic process;cellular macromolecule metabolic process;cellular metabolic process;cellular process;cellular protein metabolic process;cytoplasmic translation;macromolecule biosynthetic process;macromolecule metabolic process;metabolic process;positive regulation of catalytic activity;positive re…	cell part;cytosolic large ribosomal subunit;intracellular organelle part;intracellular part;large ribosomal subunit;macromolecular complex;organelle part;ribonucleoprotein complex	356300000000	202080000000	154220000000	1.8374	0.00986873	-0.478341	-4.126	2.70628	0.0016018	-0.869247	-7.20537	2.96322	0.000115523	-0.958852	-8.42175	7.5069	0.0512369	P10622	P10622	60S acidic ribosomal protein P1-beta	IV	229906	230527
SAM1	YLR180W	-0.67845	-0.0299976	0.210374	0.366756	2N_1N;3N_1N;4N_1N	amine biosynthetic process;amine metabolic process;aspartate family amino acid metabolic process;biosynthetic process;carboxylic acid biosynthetic process;carboxylic acid metabolic process;cellular amine metabolic process;cellular amino acid biosynthetic process;cellular amino acid metabolic process;cellular biosynthetic process;cellular ketone metabolic process;cellular metabolic process;cellula…		561980000000	329170000000	232810000000	4.74581	0	1.03534	23.9737	5.33959	0	1.31411	33.791	5.64482	0	1.58002	40.2994	15.7302	0.332364	P10659	P10659	S-adenosylmethionine synthase 1	XII	515262	516410
MRP1	YDR347W	-0.604573	-0.160918	-0.101048	-0.0903206	2N_1N;3N_1N;4N_1N	biosynthetic process;cellular biosynthetic process;cellular component organization;cellular component organization at cellular level;cellular component organization or biogenesis;cellular component organization or biogenesis at cellular level;cellular macromolecule biosynthetic process;cellular macromolecule metabolic process;cellular metabolic process;cellular process;cellular protein metabolic …	cell part;cytoplasmic part;intracellular organelle part;intracellular part;macromolecular complex;mitochondrial part;mitochondrial small ribosomal subunit;organellar small ribosomal subunit;organelle part;ribonucleoprotein complex;small ribosomal subunit	10234000000	5173500000	5061000000	2.74625	0.00210661	0.852801	7.38362	2.96157	0.00089243	0.990722	8.41342	3.13782	0.000131148	1.10375	9.35174	8.84564	0.0662826	P10662	P10662	37S ribosomal protein MRP1. mitochondrial	IV	1169178	1170143
RPL4A	YBR031W	0.121239	0.251258	0.287269	0.1073	2N_1N;3N_1N;4N_1N	biosynthetic process;cellular biosynthetic process;cellular macromolecule biosynthetic process;cellular macromolecule metabolic process;cellular metabolic process;cellular process;cellular protein metabolic process;cytoplasmic translation;macromolecule biosynthetic process;macromolecule metabolic process;metabolic process;primary metabolic process;protein metabolic process;translation	cell part;cytosolic large ribosomal subunit;intracellular organelle part;intracellular part;large ribosomal subunit;macromolecular complex;organelle part;ribonucleoprotein complex	945710000000	531200000000	414510000000	2.02484	0.00690792	0.46079	4.68052	2.31292	0.00278445	0.570976	5.64002	2.05247	0.00158242	0.477034	4.76664	6.39023	0.0449675	P10664	P10664	60S ribosomal protein L4-A	II	300166	301254
GPA2	YER020W	NaN	-0.2873	-0.359559	-0.276897		activation of adenylate cyclase activity;activation of adenylate cyclase activity by G-protein signaling pathway;aging;anatomical structure development;anatomical structure formation involved in morphogenesis;ascospore formation;biological regulation;cAMP-mediated signaling;carbohydrate homeostasis;carbohydrate mediated signaling;cell aging;cell development;cell differentiation;cell growth;cell s…	cell part;membrane;plasma membrane	3197600000	1790800000	1406800000	0	0.954918	NaN	0	0	0.957525	NaN	0	0	1	NaN	0	0	0.997524	P10823	P10823	Guanine nucleotide-binding protein alpha-2 subunit	V	195168	196517
MTF2	YDL044C	-0.0753045	-0.101231	-0.14051	-0.0406086		biosynthetic process;cellular biosynthetic process;cellular macromolecule biosynthetic process;cellular macromolecule metabolic process;cellular metabolic process;cellular nitrogen compound metabolic process;cellular process;cellular protein metabolic process;cytoplasmic translation;macromolecule biosynthetic process;macromolecule metabolic process;metabolic process;mRNA metabolic process;mRNA pr…	cell part;cytoplasmic part;intracellular membrane-bounded organelle;intracellular organelle;intracellular organelle lumen;intracellular organelle part;intracellular part;membrane-bounded organelle;membrane-enclosed lumen;mitochondrial matrix;mitochondrial part;mitochondrion;organelle;organelle lumen;organelle part	7396900000	4579900000	2817000000	0.656548	0.162599	0.818808	1.45054	0.604787	0.133197	0.766376	1.34971	0.836954	0.0501635	1.01559	1.80399	2.09829	0.209524	P10849	P10849	Mitochondrial transcription factor 2	IV	373967	375289
RAD18	YCR066W	0.184732	0.479392	-0.0164258	0.138107	2N_1N;4N_1N	biosynthetic process;cellular biosynthetic process;cellular macromolecule biosynthetic process;cellular macromolecule metabolic process;cellular metabolic process;cellular nitrogen compound metabolic process;cellular process;cellular protein metabolic process;cellular response to stimulus;cellular response to stress;DNA biosynthetic process;DNA metabolic process;DNA repair;error-free postreplicat…	cell part;chromatin;chromosomal part;intracellular membrane-bounded organelle;intracellular organelle;intracellular organelle part;intracellular part;membrane-bounded organelle;nuclear chromatin;nuclear chromosome part;nuclear part;nucleus;organelle;organelle part	1263100000	682580000	580490000	1.46095	0.0183486	0.782691	3.68659	0	0.957179	0.349591	0	1.19063	0.0190673	0.600282	2.86198	2.65157	0.135594	P10862	P10862	Postreplication repair E3 ubiquitin-protein ligase RAD18	III	231500	232963
HOM3	YER052C	0.182723	0.190095	0.728173	0.763804	3N_1N;4N_1N	amine biosynthetic process;amine metabolic process;aspartate family amino acid biosynthetic process;aspartate family amino acid metabolic process;biosynthetic process;carboxylic acid biosynthetic process;carboxylic acid metabolic process;cellular amine metabolic process;cellular amino acid biosynthetic process;cellular amino acid metabolic process;cellular biosynthetic process;cellular ketone met…		75300000000	55837000000	19463000000	0.798709	0.105465	0.553827	1.7285	1.63308	0.00711429	1.14007	3.57475	1.7516	0.00439818	1.25031	3.88822	4.18339	0.0544608	P10869	P10869	Aspartokinase	V	256375	257958
HSF1	YGL073W	0.241892	0.0649815	-0.0796681	0.36133	2N_1N;4N_1N	biological regulation;biosynthetic process;cellular biosynthetic process;cellular macromolecule biosynthetic process;cellular macromolecule metabolic process;cellular metabolic process;cellular nitrogen compound metabolic process;cellular process;macromolecule biosynthetic process;macromolecule metabolic process;metabolic process;negative regulation of biological process;negative regulation of ce…	cell part;intracellular membrane-bounded organelle;intracellular organelle;intracellular part;membrane-bounded organelle;nucleus;organelle	2703500000	1159200000	1544300000	1.24851	0.031155	0.294371	2.65937	0.459102	0.237342	0.12985	1.1114	1.71998	0.00459755	0.667007	4.62288	3.42759	0.0795618	P10961	P10961	Heat shock factor protein	VII	368753	371254
MAK16	YAL025C	1.26421	0.38818	0.597492	0.367682	2N_1N;3N_1N;4N_1N	cell cycle;cellular component biogenesis;cellular component biogenesis at cellular level;cellular component organization or biogenesis;cellular component organization or biogenesis at cellular level;cellular macromolecule metabolic process;cellular metabolic process;cellular nitrogen compound metabolic process;cellular process;macromolecule metabolic process;maturation of 5.8S rRNA;maturation of …	cell part;intracellular non-membrane-bounded organelle;intracellular organelle;intracellular organelle part;intracellular part;macromolecular complex;non-membrane-bounded organelle;nuclear part;nucleolus;organelle;organelle part;preribosome;preribosome. large subunit precursor;ribonucleoprotein complex	12568000000	7809400000	4758900000	3.22472	0.00126394	-0.562043	-9.84917	2.12017	0.00333386	-0.345858	-4.9827	2.77393	0.000102455	-0.449349	-7.50935	8.11882	0.0572244	P10962	P10962	Protein MAK16	I	100225	101145
RPA190	YOR341W	-0.30972	0.105361	0.588847	0.534825	2N_1N;3N_1N;4N_1N	biosynthetic process;cellular biosynthetic process;cellular component biogenesis;cellular component biogenesis at cellular level;cellular component organization or biogenesis;cellular component organization or biogenesis at cellular level;cellular macromolecule biosynthetic process;cellular macromolecule metabolic process;cellular metabolic process;cellular nitrogen compound metabolic process;cel…	cell part;DNA-directed RNA polymerase complex;DNA-directed RNA polymerase I complex;intracellular non-membrane-bounded organelle;intracellular organelle;intracellular organelle part;intracellular part;macromolecular complex;non-membrane-bounded organelle;nuclear DNA-directed RNA polymerase complex;nuclear part;nucleolar part;nucleolus;organelle;organelle part;protein complex;RNA polymerase complex	215260000000	132270000000	82990000000	3.70193	0.00096875	0.74612	13.0563	5.97764	0	1.27058	48.8252	5.11271	0	1.2888	29.641	14.7923	0.304667	P10964	P10964	DNA-directed RNA polymerase I subunit RPA190	XV	960987	965981
SEC7	YDR170C	0.107277	-0.396633	-0.131152	-0.0156462	2N_1N;3N_1N;4N_1N	autophagic vacuole assembly;biological regulation;cellular component assembly;cellular component assembly at cellular level;cellular component organization;cellular component organization at cellular level;cellular component organization or biogenesis;cellular component organization or biogenesis at cellular level;cellular process;ER to Golgi vesicle-mediated transport;establishment of localizati…	cell part;cytoplasmic membrane-bounded vesicle;cytoplasmic part;cytoplasmic vesicle;cytosol;endosome;Golgi apparatus part;Golgi-associated vesicle;intracellular membrane-bounded organelle;intracellular organelle;intracellular organelle part;intracellular part;late endosome;membrane-bounded organelle;membrane-bounded vesicle;organelle;organelle part;trans-Golgi network;vesicle	74738000000	40571000000	34167000000	1.22798	0.0334932	-0.193146	-2.6142	0.930082	0.0426653	0.137685	1.98987	2.34181	0.000449664	0.341786	5.74429	4.49988	0.0495875	P11075	P11075	Protein transport protein SEC7	IV	796193	802222
ARF2;ARF1	YDL137W;YDL192W	-0.0559218	-1.23539	-0.23626	-0.168678	2N_1N;4N_1N	autophagy;biological regulation;catabolic process;cell communication;cellular catabolic process;cellular metabolic process;cellular process;cellular response to external stimulus;cellular response to extracellular stimulus;cellular response to nutrient levels;cellular response to starvation;cellular response to stimulus;cellular response to stress;ER to Golgi vesicle-mediated transport;establishm…	cell part;cytoplasmic part;Golgi apparatus;intracellular membrane-bounded organelle;intracellular organelle;intracellular part;membrane-bounded organelle;organelle	25202000000	13227000000	11975000000	2.72293	0.00202875	-0.807785	-7.27913	0.732134	0.0836304	0.186914	1.59795	1.51097	0.00842356	0.487604	3.26845	4.96603	0.0454952	P19146;P11076	P19146;P11076	ADP-ribosylation factor 2;ADP-ribosylation factor 1
PYC1	YGL062W	-0.565403	-0.177262	0.252427	0.273947	2N_1N;3N_1N;4N_1N	alcohol biosynthetic process;alcohol metabolic process;biosynthetic process;carbohydrate biosynthetic process;carbohydrate metabolic process;cellular biosynthetic process;cellular carbohydrate biosynthetic process;cellular carbohydrate metabolic process;cellular metabolic process;cellular process;gluconeogenesis;glucose metabolic process;hexose biosynthetic process;hexose metabolic process;metabo…	cell part;cytoplasmic part;cytosol;intracellular part	7725100000	4511800000	3213300000	3.07484	0.00166361	0.728341	13.6988	3.20876	0.000758735	1.22457	15.1997	2.51218	0.000393744	1.28466	8.81655	8.79578	0.065104	P11154	P11154	Pyruvate carboxylase 1	VII	385196	388732
HEM13	YDR044W	-0.605325	-0.0317963	0.103011	-0.646037	2N_1N;3N_1N;4N_1N	biosynthetic process;cellular aromatic compound metabolic process;cellular biosynthetic process;cellular metabolic process;cellular nitrogen compound biosynthetic process;cellular nitrogen compound metabolic process;cellular process;cofactor biosynthetic process;cofactor metabolic process;heme biosynthetic process;heme metabolic process;heterocycle biosynthetic process;heterocycle metabolic proce…	cell part;cytoplasmic part;cytosol;intracellular part	21257000000	11632000000	9624700000	2.41374	0.0033865	1.00109	6.01075	2.85408	0.00134479	1.20334	7.88422	1.64244	0.0056825	0.582044	3.5989	6.91026	0.0471708	P11353	P11353	Oxygen-dependent coproporphyrinogen-III oxidase	IV	546642	547628
ZWF1	YNL241C	-0.767243	-0.313731	-0.0364814	0.331883	2N_1N;3N_1N;4N_1N	alcohol metabolic process;carbohydrate metabolic process;cellular carbohydrate metabolic process;cellular metabolic process;cellular nitrogen compound metabolic process;cellular process;coenzyme metabolic process;cofactor metabolic process;glucose metabolic process;heterocycle metabolic process;hexose metabolic process;metabolic process;monosaccharide metabolic process;NADP metabolic process;NADP…		105060000000	58198000000	46863000000	2.94455	0.0017672	0.763938	8.32752	3.44812	0.000721992	1.08487	11.2442	4.23596	0	1.56655	17.8347	10.6286	0.103809	P11412	P11412	Glucose-6-phosphate 1-dehydrogenase	XIV	196426	197943
CDC24	YAL041W	-0.521282	-0.141771	0.262999	-0.356769	2N_1N;3N_1N;4N_1N	biological regulation;cellular bud site selection;cellular component organization;cellular component organization at cellular level;cellular component organization or biogenesis;cellular component organization or biogenesis at cellular level;cellular process;cellular response to stimulus;cytokinesis. site selection;cytokinetic process;cytoskeleton organization;establishment of cell polarity;estab…	cell part;cell projection part;cellular bud neck;cellular bud tip;cytoplasm;incipient cellular bud site;intracellular membrane-bounded organelle;intracellular organelle;intracellular part;mating projection tip;membrane-bounded organelle;nucleus;organelle;site of polarized growth	5867000000	3183700000	2683300000	1.31556	0.026057	0.60623	2.80922	1.78664	0.00556426	1.03405	3.98417	1.1814	0.0194386	0.679928	2.51284	4.28359	0.0528576	P11433	P11433	Cell division control protein 24	I	62840	65404
SSB1	YDL229W	1.24912	0.328351	0.166632	0.124003		biological regulation;biosynthetic process;cell communication;cellular biosynthetic process;cellular component disassembly;cellular component disassembly at cellular level;cellular component organization;cellular component organization at cellular level;cellular component organization or biogenesis;cellular component organization or biogenesis at cellular level;cellular localization;cellular macr…	cell part;cytoplasm;intracellular part;macromolecular complex;polysome;ribonucleoprotein complex	148170000000	88805000000	59361000000	0.66655	0.156944	-0.407496	-1.47002	0.761692	0.0751828	-0.458222	-1.6558	0.698639	0.0839154	-0.421186	-1.53256	2.12688	0.20458	P11484	P11484	Heat shock protein SSB1	IV	44065	45906
PHO8	YDR481C	0.610799	0.387562	0.174346	0.0354931		cellular macromolecule metabolic process;cellular metabolic process;cellular nitrogen compound metabolic process;cellular process;cellular protein metabolic process;coenzyme metabolic process;cofactor metabolic process;dephosphorylation;heterocycle metabolic process;macromolecule metabolic process;macromolecule modification;metabolic process;nicotinamide nucleotide metabolic process;nitrogen comp…	cell part;cytoplasmic part;fungal-type vacuole membrane;integral to membrane;intracellular organelle part;intracellular part;intrinsic to membrane;membrane;membrane part;organelle membrane;organelle part;vacuolar membrane;vacuolar part	4594800000	2777600000	1817200000	0.433902	0.347642	0.420535	1.01334	0.277701	0.557137	0.301575	0.690966	0.277524	0.56154	0.28833	0.690588	0.989127	0.577901	P11491	P11491	Repressible alkaline phosphatase;Soluble alkaline phosphatase	IV	1418550	1420250
NHP6A	YPR052C	0.924715	-0.115478	-0.521221	-0.398612	2N_1N;3N_1N;4N_1N	biological regulation;biosynthetic process;cellular biosynthetic process;cellular component assembly;cellular component assembly at cellular level;cellular component organization;cellular component organization at cellular level;cellular component organization or biogenesis;cellular component organization or biogenesis at cellular level;cellular macromolecular complex assembly;cellular macromolec…	cell part;chromosome;intracellular membrane-bounded organelle;intracellular non-membrane-bounded organelle;intracellular organelle;intracellular part;membrane-bounded organelle;non-membrane-bounded organelle;nucleus;organelle	39236000000	20190000000	19047000000	3.96678	0	-0.675502	-15.2456	4.14619	0	-1.00048	-16.9269	3.86782	0	-0.778709	-14.3889	11.9808	0.155516	P11632	P11632	Non-histone chromosomal protein 6A	XVI	665693	665974
SEC12	YNR026C	-0.152018	0.119123	0.0299901	0.0104937	2N_1N;3N_1N;4N_1N	biological regulation;catabolic process;cellular catabolic process;cellular metabolic process;cellular nitrogen compound catabolic process;cellular nitrogen compound metabolic process;cellular process;establishment of localization;establishment of protein localization;GTP catabolic process;GTP metabolic process;heterocycle catabolic process;heterocycle metabolic process;metabolic process;nitrogen…	cell part;cytoplasmic part;endoplasmic reticulum;endoplasmic reticulum membrane;endoplasmic reticulum part;Golgi apparatus;integral to membrane;intracellular membrane-bounded organelle;intracellular organelle;intracellular organelle part;intracellular part;intrinsic to membrane;membrane;membrane part;membrane-bounded organelle;organelle;organelle membrane;organelle part	6617500000	3822000000	2795500000	3.05506	0.00199403	0.686617	8.89978	2.50232	0.00171203	0.626975	6.35306	2.52994	0.0003974	0.690446	6.46316	8.08732	0.0568311	P11655	P11655	Guanine nucleotide-exchange factor SEC12	XIV	673274	674689
BIK1	YCL029C	0.600463	0.188255	-0.183396	-0.209045	3N_1N	biological regulation;cell cycle phase;cell cycle process;cell division;cellular component movement;cellular component organization;cellular component organization at cellular level;cellular component organization or biogenesis;cellular component organization or biogenesis at cellular level;cellular process;cellular process involved in reproduction;cytoskeleton-dependent intracellular transport;e…	cell cortex;cell part;cell projection part;chromosomal part;condensed chromosome kinetochore;condensed nuclear chromosome kinetochore;cytoplasmic part;cytoskeletal part;intracellular non-membrane-bounded organelle;intracellular organelle;intracellular organelle part;intracellular part;kinetochore;macromolecular complex;mating projection tip;microtubule;microtubule organizing center;microtubule pl…	7075600000	3865100000	3210500000	0.121992	0.852347	-0.0546872	-0.334071	1.03318	0.0318813	-0.338908	-2.20008	0.545109	0.153139	-0.195374	-1.23316	1.70028	0.297756	P11709	P11709	Nuclear fusion protein BIK1	III	68599	69921
RNA1	YMR235C	-0.730161	-0.485661	0.26786	0.599299	2N_1N;3N_1N;4N_1N	biological regulation;cellular localization;cellular process;chromatin silencing;chromatin silencing at telomere;establishment of localization;establishment of localization in cell;establishment of organelle localization;establishment of protein localization;establishment of ribosome localization;establishment of RNA localization;gene silencing;intracellular protein transport;intracellular transp…	cell part;cytoplasmic part;cytosol;intracellular membrane-bounded organelle;intracellular organelle;intracellular part;membrane-bounded organelle;nucleus;organelle	128220000000	73702000000	54519000000	1.40199	0.0206	0.416641	3.00799	3.17907	0.0007343	1.27537	9.5849	3.5087	0.000176147	1.65929	11.6535	8.08977	0.0568869	P11745	P11745	Ran GTPase-activating protein 1	XIII	741512	742735
TAF13	YML098W	0.885944	0.133018	-0.225278	-0.325185	2N_1N;3N_1N;4N_1N	biological regulation;biosynthetic process;cellular biosynthetic process;cellular component assembly;cellular component assembly at cellular level;cellular component organization;cellular component organization at cellular level;cellular component organization or biogenesis;cellular component organization or biogenesis at cellular level;cellular macromolecular complex assembly;cellular macromolec…	cell part;intracellular organelle part;intracellular part;macromolecular complex;nuclear part;nucleoplasm part;organelle part;protein complex;transcription factor complex;transcription factor TFIID complex	3166600000	1665600000	1501000000	2.37054	0.00358174	-0.43803	-5.84952	3.61598	0	-0.752458	-12.4134	2.42608	0.000376761	-0.798546	-6.0575	8.41259	0.0604216	P11747	P11747	Transcription initiation factor TFIID subunit 13	XIII	77267	77770
SCH9	YHR205W	-0.0363766	-0.283746	-0.294874	-2.79667		age-dependent response to oxidative stress;age-dependent response to oxidative stress involved in chronological cell aging;aging;biological regulation;cell aging;cellular macromolecule metabolic process;cellular metabolic process;cellular process;cellular protein metabolic process;cellular response to chemical stimulus;cellular response to oxidative stress;cellular response to stimulus;cellular r…	cell part;cytoplasm;cytoplasmic part;fungal-type vacuole membrane;intracellular membrane-bounded organelle;intracellular organelle;intracellular organelle part;intracellular part;membrane;membrane-bounded organelle;nucleus;organelle;organelle membrane;organelle part;vacuolar membrane;vacuolar part	5013500000	1713200000	3300300000	0	0.95525	0.13027	0	0	0.956167	0.235275	0	0	1	-2.2659	0	0	0.992777	P11792	P11792	Serine/threonine-protein kinase SCH9	VIII	509363	511837
MAS2	YHR024C	-0.968997	-0.283207	-0.0312588	0.0320129	2N_1N;3N_1N;4N_1N	cellular macromolecule metabolic process;cellular metabolic process;cellular process;cellular protein metabolic process;macromolecule metabolic process;metabolic process;mitochondrial protein processing;primary metabolic process;protein maturation;protein metabolic process;protein processing;protein processing involved in protein targeting to mitochondrion	cell part;cytoplasmic part;intracellular organelle lumen;intracellular organelle part;intracellular part;macromolecular complex;membrane-enclosed lumen;mitochondrial matrix;mitochondrial part;mitochondrial processing peptidase complex;organelle lumen;organelle part;protein complex	19081000000	10286000000	8794800000	2.28569	0.00416667	0.94682	5.54318	2.82951	0.00144485	1.23894	7.76754	2.98171	0.000116788	1.43302	8.51607	8.09691	0.0570034	P11914	P11914	Mitochondrial-processing peptidase subunit alpha	VIII	157744	159192
RAP1	YNL216W	-0.307957	0.0528125	0.00928348	0.0138484	2N_1N;3N_1N;4N_1N	anatomical structure homeostasis;biological regulation;biosynthetic process;cellular biosynthetic process;cellular component organization;cellular component organization at cellular level;cellular component organization or biogenesis;cellular component organization or biogenesis at cellular level;cellular macromolecule biosynthetic process;cellular macromolecule metabolic process;cellular metabol…	cell part;chromosomal part;chromosome;chromosome. telomeric region;cytoplasmic part;cytosol;intracellular membrane-bounded organelle;intracellular non-membrane-bounded organelle;intracellular organelle;intracellular organelle part;intracellular part;macromolecular complex;membrane-bounded organelle;non-membrane-bounded organelle;nuclear chromosome;nuclear chromosome part;nuclear chromosome. telom…	42299000000	24731000000	17568000000	3.16301	0.00116838	0.758889	9.49345	2.99307	0.00091678	0.728564	8.57451	3.4091	0.000161345	0.854281	10.9878	9.56518	0.0790557	P11938	P11938	DNA-binding protein RAP1	XIV	241689	244172
SST2	YLR452C	-0.710051	0.304196	0.143278	-0.0554915	2N_1N;3N_1N	adaptation of signaling pathway;adaptation of signaling pathway by response to pheromone involved in conjugation with cellular fusion;biological regulation;cellular process;cellular process involved in reproduction;cellular response to chemical stimulus;cellular response to stimulus;intracellular signal transduction;negative regulation of biological process;negative regulation of cell communicati…	cell part;membrane;plasma membrane	3133100000	2021200000	1111900000	2.1003	0.00576037	1.39186	6.33955	0.945799	0.0409256	1.60738	2.21763	0	1	1.14895	0	3.0461	0.102683	P11972	P11972	Protein SST2	XII	1039270	1041366
SIR4	YDR227W	0.0556579	0.241712	0.0594021	-0.0522444		biological regulation;biosynthetic process;cellular biosynthetic process;cellular component organization;cellular component organization at cellular level;cellular component organization or biogenesis;cellular component organization or biogenesis at cellular level;cellular macromolecule biosynthetic process;cellular macromolecule metabolic process;cellular metabolic process;cellular nitrogen comp…	cell part;chromatin;chromatin remodeling complex;chromatin silencing complex;chromosomal part;chromosome. telomeric region;heterochromatin;intracellular organelle part;intracellular part;macromolecular complex;nuclear chromatin;nuclear chromosome part;nuclear chromosome. telomeric region;nuclear heterochromatin;nuclear part;nuclear telomeric heterochromatin;organelle part;protein complex;telomeri…	4105700000	2300100000	1805600000	0.577996	0.207801	0.277044	1.29746	0.315157	0.468204	0.198707	0.770482	0.308143	0.482944	0.168658	0.755723	1.2013	0.477007	P11978	P11978	Regulatory protein SIR4	IV	917571	921647
INO1	YJL153C	-0.316252	1.04542	0.716727	-0.867332	2N_1N;3N_1N	alcohol biosynthetic process;alcohol metabolic process;biosynthetic process;carbohydrate biosynthetic process;carbohydrate metabolic process;cellular biosynthetic process;cellular carbohydrate biosynthetic process;cellular carbohydrate metabolic process;cellular lipid metabolic process;cellular metabolic process;cellular process;inositol biosynthetic process;inositol metabolic process;lipid biosy…	cell part;cytoplasm;intracellular part	7818300000	4806200000	3012100000	1.30711	0.026728	1.25799	2.79013	1.17386	0.0213267	1.04637	2.49659	0.495908	0.187169	-0.479913	-1.13648	2.97687	0.107612	P11986	P11986	Inositol-3-phosphate synthase	X	134332	135933
PDR1	YGL013C	NaN	NaN	-0.14919	0.392315		biological regulation;positive regulation of biological process;positive regulation of biosynthetic process;positive regulation of cellular biosynthetic process;positive regulation of cellular metabolic process;positive regulation of cellular process;positive regulation of cellular response to drug;positive regulation of gene expression;positive regulation of macromolecule biosynthetic process;po…	cell part;cytoplasmic part;cytosol;intracellular membrane-bounded organelle;intracellular organelle;intracellular part;membrane-bounded organelle;nucleus;organelle	765280000	475640000	289640000	NaN	1	0	NaN	0	0.955149	NaN	0	0	1	NaN	0	NaN	0.359385	P12383	P12383	Transcription factor PDR1	VII	469092	472298
SUP45	YBR143C	-0.627581	-0.273575	0.165386	0.262388	2N_1N;3N_1N;4N_1N	biosynthetic process;cellular biosynthetic process;cellular component disassembly;cellular component disassembly at cellular level;cellular component organization;cellular component organization at cellular level;cellular component organization or biogenesis;cellular component organization or biogenesis at cellular level;cellular macromolecular complex disassembly;cellular macromolecular complex …	cell part;cytoplasmic part;cytosol;intracellular non-membrane-bounded organelle;intracellular organelle;intracellular part;macromolecular complex;non-membrane-bounded organelle;organelle;protein complex;ribonucleoprotein complex;RNA granule;stress granule;translation release factor complex	225770000000	125130000000	100640000000	2.79864	0.00221029	0.695068	7.62319	3.9297	0	1.18224	14.9189	4.16958	0	1.38778	17.159	10.8979	0.112785	P12385	P12385	Eukaryotic peptide chain release factor subunit 1	II	530869	532182
WHI2	YOR043W	-0.540934	-0.658437	-0.212557	-0.303382	3N_1N;4N_1N	actin cytoskeleton organization;actin filament organization;actin filament-based process;autophagy;biological regulation;catabolic process;cell cycle;cellular catabolic process;cellular component organization;cellular component organization at cellular level;cellular component organization or biogenesis;cellular component organization or biogenesis at cellular level;cellular membrane organization…		7110200000	3888000000	3222100000	0.912483	0.0744516	0.401241	1.95449	3.15609	0.000721519	0.774929	9.45436	2.26897	0.000432607	0.877661	5.48438	6.33754	0.0448477	P12611	P12611	Growth regulation protein	XV	410870	412330
TCP1	YDR212W	-0.593102	0.00500617	0.327577	0.23683	2N_1N;3N_1N;4N_1N	cellular macromolecule metabolic process;cellular metabolic process;cellular process;cellular protein metabolic process;macromolecule metabolic process;metabolic process;primary metabolic process;protein folding;protein metabolic process	cell part;chaperonin-containing T-complex;cytoplasmic part;cytosolic part;intracellular part;macromolecular complex;protein complex	129320000000	75753000000	53567000000	2.08186	0.00598652	0.780005	4.85955	3.07233	0.00066087	1.2336	8.99238	3.12027	0.000128859	1.26302	9.25418	8.27447	0.0588952	P12612	P12612	T-complex protein 1 subunit alpha	IV	887232	888911
BAR1	YIL015W	1.45929	0.711604	0.26593	0.0131238	2N_1N;3N_1N;4N_1N	adaptation of signaling pathway;adaptation of signaling pathway by response to pheromone involved in conjugation with cellular fusion;biological regulation;catabolic process;cellular catabolic process;cellular metabolic process;cellular process;cellular process involved in reproduction;cellular response to chemical stimulus;cellular response to stimulus;metabolic process;peptide catabolic process…	cell part;cell wall-bounded periplasmic space;extracellular region;periplasmic space	8986300000	5510100000	3476100000	1.48445	0.0174409	-0.468378	-3.204	2.22062	0.00308819	-0.792994	-5.31719	2.67392	0.00030303	-1.01366	-7.06384	6.37899	0.0449433	P12630	P12630	Barrierpepsin	IX	322342	324105
HMG1	YML075C	-0.262633	0.125696	0.118495	-0.0170227	2N_1N;3N_1N;4N_1N	acetyl-CoA metabolic process;alcohol biosynthetic process;alcohol metabolic process;biosynthetic process;cellular alcohol biosynthetic process;cellular alcohol metabolic process;cellular biosynthetic process;cellular lipid metabolic process;cellular metabolic process;cellular nitrogen compound metabolic process;cellular process;coenzyme A metabolic process;coenzyme metabolic process;cofactor meta…	cell part;cytoplasmic part;endoplasmic reticulum membrane;endoplasmic reticulum part;envelope;integral to membrane;intracellular organelle part;intracellular part;intrinsic to membrane;membrane;membrane part;nuclear envelope;nuclear part;organelle envelope;organelle membrane;organelle part	19687000000	11395000000	8292100000	3.17258	0.00118056	0.685009	9.54783	3.21974	0.000765101	0.784941	9.81999	3.29674	0.000147014	0.716076	10.28	9.68905	0.0812007	P12683	P12683	3-hydroxy-3-methylglutaryl-coenzyme A reductase 1	XIII	115734	118898
HMG2	YLR450W	-1.28261	0.0612911	0.0705881	-0.36112		alcohol biosynthetic process;alcohol metabolic process;biosynthetic process;cellular alcohol biosynthetic process;cellular alcohol metabolic process;cellular biosynthetic process;cellular lipid metabolic process;cellular metabolic process;cellular nitrogen compound metabolic process;cellular process;coenzyme A metabolic process;coenzyme metabolic process;cofactor metabolic process;ergosterol bios…	cell part;cytoplasmic part;endoplasmic reticulum membrane;endoplasmic reticulum part;envelope;integral to membrane;intracellular organelle part;intracellular part;intrinsic to membrane;membrane;membrane part;nuclear envelope;nuclear part;organelle envelope;organelle membrane;organelle part	2089400000	1105400000	984010000	0.215335	0.703313	0.731611	0.569168	0	0.954808	0.803626	0	0.130918	0.865166	0.468077	0.364379	0.346253	0.948067	P12684	P12684	3-hydroxy-3-methylglutaryl-coenzyme A reductase 2	XII	1032627	1035764
TRK1	YJL129C	0.385473	0.2914	0.33907	0.127264	3N_1N;4N_1N	biological regulation;cation homeostasis;cellular cation homeostasis;cellular chemical homeostasis;cellular homeostasis;cellular ion homeostasis;cellular metal ion homeostasis;cellular monovalent inorganic cation homeostasis;cellular potassium ion homeostasis;cellular process;chemical homeostasis;homeostatic process;ion homeostasis;metal ion homeostasis;monovalent inorganic cation homeostasis;pot…	cell part;integral to membrane;integral to plasma membrane;intrinsic to membrane;intrinsic to plasma membrane;membrane;membrane part;membrane raft;plasma membrane;plasma membrane part	28500000000	15566000000	12934000000	0	0.955593	0.224465	0	1.77806	0.00563014	0.334852	4.85627	1.67697	0.00555387	0.211902	3.6889	3.45503	0.0783411	P12685	P12685	High-affinity potassium transport protein	X	173599	177306
MRP13	YGR084C	-0.527934	-0.0279391	-0.145972	-0.188103	2N_1N;3N_1N;4N_1N	biosynthetic process;cellular biosynthetic process;cellular component organization;cellular component organization at cellular level;cellular component organization or biogenesis;cellular component organization or biogenesis at cellular level;cellular macromolecule biosynthetic process;cellular macromolecule metabolic process;cellular metabolic process;cellular process;cellular protein metabolic …	cell part;cytoplasmic part;intracellular organelle part;intracellular part;macromolecular complex;mitochondrial part;mitochondrial small ribosomal subunit;organellar small ribosomal subunit;organelle part;ribonucleoprotein complex;small ribosomal subunit	4356700000	2216500000	2140300000	2.57323	0.00274552	0.707802	6.6389	2.34741	0.00265108	0.71916	5.76467	2.43894	0.000380444	0.791647	6.10654	7.35957	0.0502244	P12686	P12686	37S ribosomal protein MRP13. mitochondrial	VII	647123	648142
MRP7	YNL005C	-0.504595	-0.171213	-0.290173	-0.0581681	2N_1N;3N_1N;4N_1N	biosynthetic process;cellular biosynthetic process;cellular component organization;cellular component organization at cellular level;cellular component organization or biogenesis;cellular component organization or biogenesis at cellular level;cellular macromolecule biosynthetic process;cellular macromolecule metabolic process;cellular metabolic process;cellular process;cellular protein metabolic …	cell part;cytoplasmic part;intracellular organelle part;intracellular part;large ribosomal subunit;macromolecular complex;mitochondrial large ribosomal subunit;mitochondrial part;organellar large ribosomal subunit;organelle part;ribonucleoprotein complex	9857000000	4145400000	5711600000	1.70466	0.0119893	0.689229	4.56283	1.56247	0.00841572	0.687222	4.03446	2.02358	0.00156408	0.939803	5.95491	5.29071	0.0441687	P12687	P12687	54S ribosomal protein L2. mitochondrial	XIV	621313	622428
YPK1	YKL126W	-1.12165	-0.713587	-0.154866	-0.17622	2N_1N;3N_1N;4N_1N	biological regulation;cell wall organization;cell wall organization or biogenesis;cellular component assembly;cellular component assembly at cellular level;cellular component organization;cellular component organization at cellular level;cellular component organization or biogenesis;cellular component organization or biogenesis at cellular level;cellular lipid metabolic process;cellular macromole…	cell part;cellular bud neck;cytoplasmic part;cytosol;intracellular part;membrane;plasma membrane;site of polarized growth	13645000000	6615900000	7028800000	1.51755	0.0158024	0.805112	3.28455	4.10906	0	1.29564	16.5647	4.2482	0	1.38363	17.9622	9.87481	0.0876423	P12688	P12688	Serine/threonine-protein kinase YPK1	XI	205707	207749
LAT1	YNL071W	-0.107234	-0.0671822	-0.181463	-0.00375388	2N_1N;3N_1N;4N_1N	acetyl-CoA biosynthetic process;acetyl-CoA biosynthetic process from pyruvate;acetyl-CoA metabolic process;biosynthetic process;carboxylic acid metabolic process;cellular biosynthetic process;cellular ketone metabolic process;cellular metabolic process;cellular process;coenzyme biosynthetic process;coenzyme metabolic process;cofactor biosynthetic process;cofactor metabolic process;metabolic proce…	cell part;cytoplasmic part;intracellular organelle part;intracellular part;macromolecular complex;mitochondrial part;mitochondrial pyruvate dehydrogenase complex;organelle part;protein complex;pyruvate dehydrogenase complex	298670000000	157510000000	141160000000	3.6473	0.000873239	0.370843	12.6441	2.55083	0.00153909	0.289297	6.54745	3.98648	0	0.608352	15.4219	10.1846	0.0929864	P12695	P12695	Dihydrolipoyllysine-residue acetyltransferase component of pyruvate dehydrogenase complex. mitochondrial	XIV	491523	492971
PGI1	YBR196C	-0.597097	-0.49668	0.0192522	-0.010229	2N_1N;3N_1N;4N_1N	alcohol biosynthetic process;alcohol catabolic process;alcohol metabolic process;biosynthetic process;carbohydrate biosynthetic process;carbohydrate catabolic process;carbohydrate metabolic process;catabolic process;cellular biosynthetic process;cellular carbohydrate biosynthetic process;cellular carbohydrate catabolic process;cellular carbohydrate metabolic process;cellular metabolic process;cel…	cell part;cytoplasmic part;intracellular membrane-bounded organelle;intracellular organelle;intracellular part;membrane-bounded organelle;mitochondrion;organelle	1397300000000	727970000000	669300000000	1.68042	0.0125207	0.547633	3.69796	2.82777	0.00143788	1.1459	7.75932	2.89083	0.000109966	1.19111	8.06165	7.39902	0.050444	P12709	P12709	Glucose-6-phosphate isomerase	II	612236	613900
RAD50	YNL250W	0.380499	0.205073	-0.0710844	0.00705842		anatomical structure homeostasis;base-excision repair;biological regulation;catabolic process;cell cycle phase;cell cycle process;cellular catabolic process;cellular component organization;cellular component organization at cellular level;cellular component organization or biogenesis;cellular component organization or biogenesis at cellular level;cellular macromolecule catabolic process;cellular …	cell part;intracellular membrane-bounded organelle;intracellular organelle;intracellular organelle part;intracellular part;macromolecular complex;membrane-bounded organelle;Mre11 complex;nuclear part;nucleoplasm;nucleus;organelle;organelle part;protein complex	2891900000	1516500000	1375400000	0.322164	0.515908	0.221098	0.811975	0.0603569	0.948955	0.0753702	0.177744	0.150231	0.834644	0.193929	0.412668	0.532752	0.844629	P12753	P12753	DNA repair protein RAD50	XIV	175410	179348
GCD2	YGR083C	0.330155	0.349803	0.176002	0.222346	2N_1N;4N_1N	biological regulation;positive regulation of catalytic activity;positive regulation of GTPase activity;positive regulation of hydrolase activity;positive regulation of molecular function;posttranscriptional regulation of gene expression;regulation of biological process;regulation of biosynthetic process;regulation of catabolic process;regulation of catalytic activity;regulation of cellular biosyn…	cell part;cytoplasmic part;eukaryotic translation initiation factor 2B complex;guanyl-nucleotide exchange factor complex;intracellular part;macromolecular complex;protein complex	17874000000	10509000000	7365100000	1.15494	0.0399472	0.384867	2.45596	0.82913	0.0592727	0.280699	1.78851	1.15016	0.0210915	0.401495	2.44575	3.13422	0.0967214	P12754	P12754	Translation initiation factor eIF-2B subunit delta	VII	644860	646815
PEP5	YMR231W	-0.551548	-0.426338	0.136346	-0.1017	2N_1N;3N_1N;4N_1N	biological regulation;cellular component organization;cellular component organization at cellular level;cellular component organization or biogenesis;cellular component organization or biogenesis at cellular level;cellular macromolecule metabolic process;cellular membrane fusion;cellular membrane organization;cellular metabolic process;cellular process;cellular protein metabolic process;chromatin…	cell part;CORVET complex;cytoplasmic part;endosomal part;fungal-type vacuole membrane;HOPS complex;intracellular organelle part;intracellular part;macromolecular complex;membrane;membrane part;organelle membrane;organelle part;protein complex;vacuolar membrane;vacuolar part	5088800000	2559100000	2529700000	1.20217	0.0345709	0.483902	2.55785	0.936457	0.0421659	0.837109	2.00272	2.29541	0.000438984	1.05956	5.57759	4.43404	0.050488	P12868	P12868	E3 ubiquitin-protein ligase PEP5	XIII	733545	736634
UNG1	YML021C	-0.71332	-0.121161	-0.000616875	-0.08273	3N_1N;4N_1N	base-excision repair;cellular macromolecule metabolic process;cellular metabolic process;cellular nitrogen compound metabolic process;cellular process;cellular response to stimulus;cellular response to stress;DNA metabolic process;DNA repair;macromolecule metabolic process;metabolic process;nitrogen compound metabolic process;nucleic acid metabolic process;nucleobase-containing compound metabolic…	cell part;cytoplasmic part;intracellular membrane-bounded organelle;intracellular organelle;intracellular part;membrane-bounded organelle;mitochondrion;nucleus;organelle	4646300000	2415900000	2230400000	1.02304	0.0544513	0.926451	2.17916	1.23001	0.0183482	1.06042	2.61864	1.31331	0.0136223	1.13999	2.80415	3.56636	0.0732977	P12887	P12887	Uracil-DNA glycosylase	XIII	229734	230813
SNF4	YGL115W	-0.513797	-0.521582	0.204659	0.0387711	3N_1N;4N_1N	aging;biological regulation;biosynthetic process;carbohydrate metabolic process;cell aging;cellular biosynthetic process;cellular component organization;cellular component organization at cellular level;cellular component organization or biogenesis;cellular component organization or biogenesis at cellular level;cellular macromolecule biosynthetic process;cellular macromolecule metabolic process;c…	AMP-activated protein kinase complex;cell part;cytoplasm;intracellular membrane-bounded organelle;intracellular organelle;intracellular organelle part;intracellular part;macromolecular complex;membrane;membrane-bounded organelle;membrane-enclosed lumen;nuclear envelope lumen;nuclear part;nucleus;organelle;organelle envelope lumen;organelle part;plasma membrane;protein complex	18024000000	10888000000	7136000000	0.0887512	0.898998	0.0689269	0.249627	1.46218	0.0100147	0.862853	3.15042	1.5827	0.00666667	0.927471	3.44643	3.13363	0.096719	P12904	P12904	5-AMP-activated protein kinase subunit gamma	VII	292033	293001
NAT1	YDL040C	-1.03018	-0.221839	0.092975	0.164013	2N_1N;3N_1N;4N_1N	cellular macromolecule metabolic process;cellular metabolic process;cellular process;cellular protein metabolic process;macromolecule metabolic process;macromolecule modification;metabolic process;N-terminal protein amino acid acetylation;N-terminal protein amino acid modification;primary metabolic process;protein acetylation;protein acylation;protein metabolic process;protein modification process	cell part;cytoplasmic part;intracellular part;macromolecular complex;NatA complex;N-terminal protein acetyltransferase complex;protein acetyltransferase complex;protein complex	76621000000	41895000000	34726000000	1.58246	0.0144996	1.00448	3.44583	2.07655	0.00325603	1.38923	4.84265	2.23603	0.000525896	1.54251	5.37003	5.89505	0.0437425	P12945	P12945	N-terminal acetyltransferase A complex subunit NAT1	IV	378874	381438
CAF20	YOR276W	1.07258	0.227796	-0.0808391	-0.0967757	2N_1N;3N_1N;4N_1N	biological regulation;negative regulation of biological process;negative regulation of biosynthetic process;negative regulation of cellular biosynthetic process;negative regulation of cellular macromolecule biosynthetic process;negative regulation of cellular metabolic process;negative regulation of cellular process;negative regulation of cellular protein metabolic process;negative regulation of …	cell part;cytoplasm;intracellular part;macromolecular complex;mRNA cap binding complex;protein complex;RNA cap binding complex	38546000000	22983000000	15562000000	1.61401	0.0143066	-0.43783	-3.52584	2.39079	0.00238235	-0.738743	-5.92464	2.10447	0.00131523	-0.605055	-4.93195	6.10927	0.0440867	P12962	P12962	Cap-associated protein CAF20	XV	841333	841818
KIN1	YDR122W	-0.253325	-0.173892	-0.443308	-0.298147	2N_1N;4N_1N	cellular macromolecule metabolic process;cellular metabolic process;cellular process;cellular protein metabolic process;establishment of localization;establishment of localization in cell;exocytosis;macromolecule metabolic process;macromolecule modification;metabolic process;phosphate-containing compound metabolic process;phosphorus metabolic process;phosphorylation;primary metabolic process;prot…	cell part;cytoplasm;internal side of plasma membrane;intracellular part;membrane;membrane part;plasma membrane;plasma membrane part	16184000000	8185200000	7998900000	1.99332	0.00731224	0.474114	4.58369	0.877778	0.0504901	0.210209	1.88508	2.06443	0.00159527	0.490677	4.80428	4.93553	0.0457592	P13185	P13185	Serine/threonine protein kinase KIN1	IV	694700	697894
KIN2	YLR096W	-0.000950411	-0.277262	-0.15092	-0.00746172	4N_1N	cellular macromolecule metabolic process;cellular metabolic process;cellular process;cellular protein metabolic process;establishment of localization;establishment of localization in cell;exocytosis;macromolecule metabolic process;macromolecule modification;metabolic process;phosphate-containing compound metabolic process;phosphorus metabolic process;phosphorylation;primary metabolic process;prot…	cell part;cytoplasm;intracellular part;membrane;plasma membrane	4862600000	2480800000	2381800000	0.00452943	1	-0.0044602	-0.0138342	0.634408	0.120533	0.338464	1.40742	1.16609	0.020481	0.546885	2.47987	1.80502	0.271181	P13186	P13186	Serine/threonine-protein kinase KIN2	XII	332590	336033
GLN4	YOR168W	0.214356	0.200254	0.27456	0.252352	2N_1N;3N_1N;4N_1N	amine metabolic process;amino acid activation;carboxylic acid metabolic process;cellular amine metabolic process;cellular amino acid metabolic process;cellular ketone metabolic process;cellular macromolecule metabolic process;cellular metabolic process;cellular nitrogen compound metabolic process;cellular process;glutaminyl-tRNA aminoacylation;macromolecule metabolic process;metabolic process;ncR…	cell part;cytoplasmic part;cytosol;intracellular membrane-bounded organelle;intracellular organelle;intracellular part;membrane-bounded organelle;mitochondrion;organelle	333010000000	199010000000	134000000000	1.72148	0.011667	0.288303	3.80695	2.29643	0.00286713	0.420042	5.58122	2.50592	0.000392301	0.486124	6.36733	6.52383	0.0457458	P13188	P13188	Glutamine--tRNA ligase	XV	649303	651732
PCT1	YGR202C	0.29081	0.0541747	-0.217046	-0.200398		alcohol metabolic process;amine metabolic process;biosynthetic process;CDP-choline pathway;cellular amine metabolic process;cellular biogenic amine metabolic process;cellular biosynthetic process;cellular lipid metabolic process;cellular metabolic process;cellular nitrogen compound metabolic process;cellular process;ethanolamine-containing compound metabolic process;glycerolipid biosynthetic proc…	cell part;cytoplasmic part;envelope;Golgi apparatus;intracellular membrane-bounded organelle;intracellular organelle;intracellular organelle part;intracellular part;membrane;membrane-bounded organelle;nuclear envelope;nuclear part;nucleus;organelle;organelle envelope;organelle part	15707000000	8365900000	7341100000	0.59685	0.195232	0.0998193	1.33424	0.0881517	0.917625	-0.0302952	-0.248067	0.0767124	0.93546	-0.0165265	-0.21802	0.761715	0.70621	P13259	P13259	Choline-phosphate cytidylyltransferase	VII	903474	904748
URA5	YML106W	-0.984904	-0.647166	0.17839	0.393725	2N_1N;3N_1N;4N_1N	biosynthetic process;cellular aromatic compound metabolic process;cellular biosynthetic process;cellular metabolic process;cellular nitrogen compound biosynthetic process;cellular nitrogen compound metabolic process;cellular process;'de novo' pyrimidine base biosynthetic process;'de novo' UMP biosynthetic process;heterocycle biosynthetic process;heterocycle metabolic process;metabolic process;nit…		59096000000	34662000000	24434000000	1.87259	0.00895558	0.642752	4.22631	3.29816	0.000812834	1.56412	10.2887	3.55893	0	1.88185	12.0036	8.72968	0.0641417	P13298;P30402	P13298	Orotate phosphoribosyltransferase 1	XIII	56773	57453
POL1	YNL102W	0.223679	0.0167768	0.107642	0.0895406	3N_1N;4N_1N	biosynthetic process;cellular biosynthetic process;cellular macromolecule biosynthetic process;cellular macromolecule metabolic process;cellular metabolic process;cellular nitrogen compound metabolic process;cellular process;cellular response to stimulus;cellular response to stress;DNA biosynthetic process;DNA metabolic process;DNA repair;DNA replication;DNA strand elongation;DNA strand elongatio…	alpha DNA polymerase:primase complex;cell part;chromosomal part;intracellular organelle part;intracellular part;macromolecular complex;nuclear chromosome part;nuclear part;organelle part;protein complex;replication fork	9938000000	5935100000	4002900000	0.994285	0.0592337	0.190683	2.12015	3.00026	0.000926897	0.283059	8.61163	2.66206	0.0003003	0.36362	7.01258	6.6566	0.046212	P13382	P13382	DNA polymerase alpha catalytic subunit A	XIV	430087	434493
SPT15	YER148W	-0.559687	-0.314892	0.0402445	0.204101	2N_1N;3N_1N;4N_1N	biological regulation;biosynthetic process;cellular biosynthetic process;cellular component assembly;cellular component assembly at cellular level;cellular component organization;cellular component organization at cellular level;cellular component organization or biogenesis;cellular component organization or biogenesis at cellular level;cellular macromolecular complex assembly;cellular macromolec…	cell part;intracellular membrane-bounded organelle;intracellular organelle;intracellular organelle part;intracellular part;macromolecular complex;membrane-bounded organelle;nuclear part;nucleoplasm;nucleoplasm part;nucleus;organelle;organelle part;protein complex;transcription factor complex;transcription factor TFIID complex;transcription factor TFIIIB complex	18883000000	10389000000	8494600000	2.21246	0.0048	0.584135	5.28937	3.27105	0.000794425	0.951713	10.1244	3.93232	0	1.26161	14.9418	9.41583	0.0762587	P13393	P13393	TATA-box-binding protein	V	465303	466025
RPO41	YFL036W	-0.401806	-0.414076	0.599049	0.161667		biosynthetic process;cellular biosynthetic process;cellular component organization;cellular component organization at cellular level;cellular component organization or biogenesis;cellular component organization or biogenesis at cellular level;cellular macromolecule biosynthetic process;cellular macromolecule metabolic process;cellular metabolic process;cellular nitrogen compound metabolic process…	cell part;cytoplasmic part;DNA-directed RNA polymerase complex;intracellular non-membrane-bounded organelle;intracellular organelle;intracellular organelle lumen;intracellular organelle part;intracellular part;macromolecular complex;membrane-enclosed lumen;mitochondrial DNA-directed RNA polymerase complex;mitochondrial matrix;mitochondrial nucleoid;mitochondrial part;non-membrane-bounded organell…	6053900000	3410000000	2643900000	0	0.965478	0.496852	0	0	0.955823	1.19011	0	0	1	1.13479	0	0	0.986837	P13433	P13433	DNA-directed RNA polymerase. mitochondrial	VI	58782	62837
CAP2	YIL034C	-0.840874	-0.285901	-0.176013	0.039524	2N_1N;3N_1N;4N_1N	actin cytoskeleton organization;actin filament capping;actin filament-based process;barbed-end actin filament capping;biological regulation;cellular component organization;cellular component organization at cellular level;cellular component organization or biogenesis;cellular component organization or biogenesis at cellular level;cellular process;cytoskeleton organization;filamentous growth;growt…	actin cortical patch;actin filament;cell cortex part;cell part;cellular bud tip;cytoplasmic part;cytoskeletal part;F-actin capping protein complex;intracellular organelle part;intracellular part;macromolecular complex;organelle part;protein complex;site of polarized growth	18289000000	10137000000	8151700000	2.63149	0.00266667	0.82693	6.88199	4.20253	0	1.04279	17.4912	4.00609	0	1.30893	15.5995	10.8401	0.110189	P13517	P13517	F-actin-capping protein subunit beta	IX	289226	290089
STE12	YHR084W	0.535681	-0.201436	0.0294303	0.0570558		biological regulation;biosynthetic process;cell growth;cellular biosynthetic process;cellular macromolecule biosynthetic process;cellular macromolecule metabolic process;cellular metabolic process;cellular nitrogen compound metabolic process;cellular process;cellular response to chemical stimulus;cellular response to organic substance;cellular response to pheromone;cellular response to stimulus;c…	cell part;intracellular membrane-bounded organelle;intracellular organelle;intracellular organelle part;intracellular part;membrane-bounded organelle;nuclear part;nucleoplasm;nucleus;organelle;organelle part	5977100000	3098500000	2878600000	0.270958	0.607734	-0.225288	-0.676456	0.0614906	0.948499	0.0412327	0.177177	0.0663805	0.951536	0.0480564	0.19041	0.398829	0.922327	P13574	P13574	Protein STE12	VIII	274174	276240
PMR1	YGL167C	-0.718133	-0.566237	-0.0512429	0.113248	2N_1N;3N_1N;4N_1N	biological regulation;calcium ion homeostasis;calcium ion transmembrane transport;calcium ion transport;cation homeostasis;cation transport;cellular calcium ion homeostasis;cellular cation homeostasis;cellular chemical homeostasis;cellular divalent inorganic cation homeostasis;cellular homeostasis;cellular ion homeostasis;cellular metal ion homeostasis;cellular process;chemical homeostasis;divale…	cell part;cytoplasmic part;Golgi apparatus;Golgi apparatus part;Golgi membrane;integral to membrane;intracellular membrane-bounded organelle;intracellular organelle;intracellular organelle part;intracellular part;intrinsic to membrane;membrane;membrane part;membrane-bounded organelle;organelle;organelle membrane;organelle part	26633000000	14218000000	12415000000	1.74801	0.0111266	0.622776	3.87847	3.13798	0.00071028	1.19202	9.35262	3.53778	0	1.42497	11.855	8.42376	0.0607744	P13586	P13586	Calcium-transporting ATPase 1	VII	187616	190468
HOM2	YDR158W	-0.0383026	0.175524	0.47424	0.517646	2N_1N;3N_1N;4N_1N	amine biosynthetic process;amine metabolic process;aspartate family amino acid biosynthetic process;aspartate family amino acid metabolic process;aspartate metabolic process;biosynthetic process;branched chain family amino acid biosynthetic process;branched chain family amino acid metabolic process;carboxylic acid biosynthetic process;carboxylic acid metabolic process;cellular amine metabolic pro…	cell part;cytoplasm;intracellular part	252330000000	160470000000	91865000000	3.77451	0	0.592153	13.624	3.75175	0	0.978304	13.4435	4.76474	0	1.08693	24.2379	12.291	0.170509	P13663	P13663	Aspartate-semialdehyde dehydrogenase	IV	770357	771454
RSR1	YGR152C	-0.200621	-0.174473	-0.0199456	0.0525198	2N_1N;3N_1N;4N_1N	asexual reproduction;axial cellular bud site selection;biological regulation;bipolar cellular bud site selection;cell budding;cell division;cellular bud site selection;cellular process;cellular process involved in reproduction;cellular response to stimulus;cytogamy;cytokinesis. site selection;cytokinetic process;establishment of cell polarity;establishment or maintenance of cell polarity;intracel…	cell part;cellular bud neck;membrane;plasma membrane;site of polarized growth	41370000000	24044000000	17326000000	1.19781	0.0350127	0.404989	2.54838	2.50877	0.00172736	0.556511	6.37865	2.40546	0.000372498	0.717766	5.97959	6.11205	0.0441395	P13856	P13856	Ras-related protein RSR1	VII	794674	795492
INO4	YOL108C	0.803919	0.187926	-0.17042	NaN		biological regulation;biosynthetic process;cellular biosynthetic process;cellular lipid metabolic process;cellular metabolic process;cellular process;lipid biosynthetic process;lipid metabolic process;metabolic process;organophosphate metabolic process;phospholipid biosynthetic process;phospholipid metabolic process;positive regulation of biological process;positive regulation of biosynthetic pro…	cell part;intracellular membrane-bounded organelle;intracellular organelle;intracellular part;membrane-bounded organelle;nucleus;organelle	666170000	340510000	325660000	0	0.965832	-0.280476	0	0	0.955486	-0.576104	0	0	1	NaN	0	0	0.987124	P13902	P13902	Protein INO4	XV	111431	111886
DPM1	YPR183W	-1.54418	-0.72467	-0.0725193	0.106085	2N_1N;3N_1N;4N_1N	biosynthetic process;carbohydrate metabolic process;cellular biosynthetic process;cellular carbohydrate metabolic process;cellular lipid metabolic process;cellular macromolecule metabolic process;cellular metabolic process;cellular process;cellular protein metabolic process;glycerolipid biosynthetic process;glycerolipid metabolic process;glycerophospholipid biosynthetic process;glycerophospholipi…	cell part;cytoplasmic part;endoplasmic reticulum;endoplasmic reticulum membrane;endoplasmic reticulum part;integral to membrane;intracellular membrane-bounded organelle;intracellular organelle;intracellular organelle part;intracellular part;intrinsic to membrane;membrane;membrane part;membrane-bounded organelle;nuclear outer membrane-endoplasmic reticulum membrane network;organelle;organelle memb…	71416000000	37159000000	34257000000	3.52671	0.000716763	1.20547	11.7779	4.38537	0	1.9147	19.4526	4.61687	0	2.202	22.2483	12.5289	0.178142	P14020	P14020	Dolichol-phosphate mannosyltransferase	XVI	900755	901558
MRPL31	YKL138C	0.559015	0.130536	-0.405719	-0.583406	3N_1N;4N_1N	biosynthetic process;cellular biosynthetic process;cellular component organization;cellular component organization at cellular level;cellular component organization or biogenesis;cellular component organization or biogenesis at cellular level;cellular macromolecule biosynthetic process;cellular macromolecule metabolic process;cellular metabolic process;cellular process;cellular protein metabolic …	cell part;cytoplasmic part;intracellular organelle part;intracellular part;large ribosomal subunit;macromolecular complex;mitochondrial large ribosomal subunit;mitochondrial part;organellar large ribosomal subunit;organelle part;ribonucleoprotein complex	2614500000	1289300000	1325200000	0.740433	0.126831	-0.126872	-1.73151	2.57658	0.00155487	-0.55025	-6.65268	1.86919	0.00274286	-0.681938	-5.24204	5.1862	0.0442958	P14063	P14063	54S ribosomal protein L31. mitochondrial	XI	185286	185681
GCY1	YOR120W	0.0821723	-0.419189	-0.46542	-0.582966		alcohol catabolic process;alcohol metabolic process;alditol metabolic process;arabinose catabolic process;arabinose metabolic process;carbohydrate catabolic process;carbohydrate metabolic process;catabolic process;cellular carbohydrate catabolic process;cellular carbohydrate metabolic process;cellular metabolic process;cellular process;cellular response to chemical stimulus;cellular response to o…	cell part;cytoplasm;intracellular part	62650000000	30558000000	32091000000	0.745286	0.125009	-0.120332	-1.62367	0.58858	0.142739	-0.0936367	-1.31811	0.220746	0.702116	-0.0601761	-0.566181	1.55461	0.341258	P14065	P14065	Glycerol 2-dehydrogenase (NADP(+))	XV	551114	552052
RPL30	YGL030W	1.10443	0.46874	0.0704441	-0.276655	2N_1N;3N_1N;4N_1N	biological regulation;biosynthetic process;cellular biosynthetic process;cellular macromolecule biosynthetic process;cellular macromolecule metabolic process;cellular metabolic process;cellular nitrogen compound metabolic process;cellular process;cellular protein metabolic process;cytoplasmic translation;macromolecule biosynthetic process;macromolecule metabolic process;metabolic process;ncRNA me…	cell part;cytoplasm;cytosolic large ribosomal subunit;intracellular organelle part;intracellular part;large ribosomal subunit;macromolecular complex;organelle part;ribonucleoprotein complex	605540000000	338780000000	266770000000	1.73021	0.0114218	-0.334609	-3.83039	2.9145	0.00112164	-0.659762	-8.17781	3.4411	0.000166957	-0.909131	-11.1976	8.0858	0.0567662	P14120	P14120	60S ribosomal protein L30	VII	439091	439638
RPL3	YOR063W	-0.32757	0.11329	0.312312	0.130052	2N_1N;3N_1N;4N_1N	biosynthetic process;cellular biosynthetic process;cellular component assembly;cellular component assembly at cellular level;cellular component organization;cellular component organization at cellular level;cellular component organization or biogenesis;cellular component organization or biogenesis at cellular level;cellular macromolecular complex assembly;cellular macromolecular complex subunit o…	cell part;cytosolic large ribosomal subunit;intracellular organelle part;intracellular part;large ribosomal subunit;macromolecular complex;organelle part;ribonucleoprotein complex	1598700000000	897440000000	701270000000	4.6427	0	0.783836	22.5839	5.32018	0	1.019	33.4146	5.38027	0	0.928203	34.5941	15.3431	0.32332	P14126	P14126	60S ribosomal protein L3	XV	444686	445849
ABF1	YKL112W	0.125772	0.250227	0.0375684	-0.0738468	2N_1N;3N_1N;4N_1N	biological regulation;biosynthetic process;cellular biosynthetic process;cellular component organization;cellular component organization at cellular level;cellular component organization or biogenesis;cellular component organization or biogenesis at cellular level;cellular macromolecule biosynthetic process;cellular macromolecule metabolic process;cellular metabolic process;cellular nitrogen comp…	cell part;intracellular membrane-bounded organelle;intracellular organelle;intracellular organelle part;intracellular part;macromolecular complex;membrane-bounded organelle;nuclear part;nucleotide-excision repair complex;nucleotide-excision repair factor 4 complex;nucleus;organelle;organelle part;protein complex	31835000000	20105000000	11730000000	2.29575	0.00391848	0.520063	5.5788	1.80915	0.00537214	0.394308	4.04664	1.63826	0.00582658	0.385516	3.58812	5.74316	0.0437279	P14164	P14164	ARS-binding factor 1	XI	226570	228765
TFS1	YLR178C	0.542164	-0.525326	-0.857842	-1.15315	2N_1N;3N_1N;4N_1N	biological regulation;regulation of biological process;regulation of cellular process;regulation of macromolecule metabolic process;regulation of metabolic process;regulation of primary metabolic process;regulation of protein metabolic process;regulation of proteolysis;regulation of Ras protein signal transduction;regulation of response to stimulus;regulation of signal transduction;regulation of …	cell part;cytoplasm;cytoplasmic part;fungal-type vacuole lumen;fungal-type vacuole membrane;intracellular organelle lumen;intracellular organelle part;intracellular part;membrane;membrane-enclosed lumen;organelle lumen;organelle membrane;organelle part;vacuolar lumen;vacuolar membrane;vacuolar part	51466000000	21732000000	29734000000	4.54768	0	-0.704603	-21.3737	4.742	0	-0.991034	-23.9209	5.09632	0	-1.17935	-29.3616	14.386	0.293383	P14306	P14306	Carboxypeptidase Y inhibitor	XII	513162	513821
FBA1	YKL060C	-0.0401247	0.0483264	0.129506	-0.363619	2N_1N;3N_1N;4N_1N	alcohol biosynthetic process;alcohol catabolic process;alcohol metabolic process;biosynthetic process;carbohydrate biosynthetic process;carbohydrate catabolic process;carbohydrate metabolic process;catabolic process;cellular biosynthetic process;cellular carbohydrate biosynthetic process;cellular carbohydrate catabolic process;cellular carbohydrate metabolic process;cellular metabolic process;cel…	cell part;cytoplasmic part;cytosol;intracellular membrane-bounded organelle;intracellular organelle;intracellular part;membrane-bounded organelle;mitochondrion;organelle	3885300000000	2027700000000	1857700000000	2.40164	0.00334039	0.470979	5.96526	2.76533	0.00139742	0.603023	7.47009	1.27479	0.0151745	0.214538	2.71767	6.44177	0.0453355	P14540	P14540	Fructose-bisphosphate aldolase	XI	326408	327487
YAK1	YJL141C	-0.14855	0.146423	-0.0858991	-0.583551	2N_1N;3N_1N	biological regulation;cellular macromolecule metabolic process;cellular metabolic process;cellular process;cellular protein metabolic process;macromolecule metabolic process;macromolecule modification;metabolic process;peptidyl-amino acid modification;peptidyl-tyrosine modification;peptidyl-tyrosine phosphorylation;phosphate-containing compound metabolic process;phosphorus metabolic process;phosp…	cell part;cytoplasm;intracellular membrane-bounded organelle;intracellular organelle;intracellular part;membrane-bounded organelle;nucleus;organelle	2144700000	1112400000	1032300000	1.32451	0.0247983	0.524636	2.8295	1.94232	0.00409993	0.427243	5.56996	0.124749	0.874038	0.0257502	0.348734	3.39157	0.0814449	P14680	P14680	Dual specificity protein kinase YAK1	X	147967	150390
CDC34	YDR054C	0.49804	0.237017	0.0942183	0.179679	4N_1N	biosynthetic process;catabolic process;cell cycle process;cell division;cellular biosynthetic process;cellular catabolic process;cellular macromolecule biosynthetic process;cellular macromolecule catabolic process;cellular macromolecule metabolic process;cellular metabolic process;cellular nitrogen compound metabolic process;cellular process;cellular protein metabolic process;DNA metabolic proces…	cell part;cullin-RING ubiquitin ligase complex;cytoplasm;intracellular membrane-bounded organelle;intracellular organelle;intracellular part;macromolecular complex;membrane-bounded organelle;nucleus;organelle;protein complex;SCF ubiquitin ligase complex;ubiquitin ligase complex	7688700000	4603100000	3085600000	0.663777	0.158539	0.256486	1.46462	0.428756	0.270496	0.150783	1.00303	0.998117	0.0307742	0.310102	2.12799	2.09065	0.210842	P14682	P14682	Ubiquitin-conjugating enzyme E2-34 kDa	IV	561440	562327
SAM35	YHR083W	NaN	NaN	0.0850572	0.0989423		cellular component assembly;cellular component assembly at cellular level;cellular component organization;cellular component organization at cellular level;cellular component organization or biogenesis;cellular component organization or biogenesis at cellular level;cellular macromolecular complex assembly;cellular macromolecular complex subunit organization;cellular membrane organization;cellular…	cell part;cytoplasmic part;intracellular organelle part;intracellular part;macromolecular complex;membrane;membrane part;mitochondrial membrane;mitochondrial membrane part;mitochondrial outer membrane;mitochondrial part;mitochondrial sorting and assembly machinery complex;organelle membrane;organelle outer membrane;organelle part;outer membrane;protein complex	1379200000	974780000	404400000	NaN	1	0	NaN	0	0.960278	NaN	0	0	1	NaN	0	NaN	0.361124	P14693	P14693	Sorting assembly machinery 35 kDa subunit	VIII	272627	273616
GCN3	YKR026C	-0.890424	-0.830615	0.198873	0.0217114	3N_1N;4N_1N	biological regulation;positive regulation of catalytic activity;positive regulation of GTPase activity;positive regulation of hydrolase activity;positive regulation of molecular function;posttranscriptional regulation of gene expression;regulation of biological process;regulation of biosynthetic process;regulation of catabolic process;regulation of catalytic activity;regulation of cellular biosyn…	cell part;cytoplasmic part;eukaryotic translation initiation factor 2B complex;guanyl-nucleotide exchange factor complex;intracellular part;macromolecular complex;protein complex	6727900000	4001100000	2726800000	0.241889	0.657383	0.211168	0.613123	2.07773	0.00325857	1.44395	4.84638	1.95736	0.00181562	1.34112	4.47507	4.27698	0.0529573	P14741	P14741	Translation initiation factor eIF-2B subunit alpha	XI	488738	489655
GFA1	YKL104C	-0.959346	-0.403596	0.211389	0.0956659	2N_1N;3N_1N;4N_1N	alcohol biosynthetic process;alcohol metabolic process;amine metabolic process;amino sugar biosynthetic process;amino sugar metabolic process;aminoglycan biosynthetic process;aminoglycan metabolic process;biosynthetic process;carbohydrate biosynthetic process;carbohydrate metabolic process;carboxylic acid metabolic process;cell wall chitin biosynthetic process;cell wall chitin metabolic process;c…		93943000000	54018000000	39925000000	3.11668	0.0014359	0.809351	9.23431	5.63068	0	1.56091	39.9719	5.60657	0	1.54116	39.4199	14.3539	0.288048	P14742	P14742	Glutamine--fructose-6-phosphate aminotransferase [isomerizing]	XI	243220	245373
NMT1	YLR195C	0.118187	0.214698	0.154465	0.235553	2N_1N;3N_1N;4N_1N	aging;cell aging;cellular macromolecule metabolic process;cellular metabolic process;cellular process;cellular protein metabolic process;developmental process;macromolecule metabolic process;macromolecule modification;metabolic process;N-terminal peptidyl-glycine N-myristoylation;N-terminal protein amino acid modification;N-terminal protein lipidation;N-terminal protein myristoylation;peptidyl-am…	cell part;cytoplasmic part;cytosol;intracellular part	19743000000	11619000000	8123900000	1.45607	0.0183169	0.336374	3.13581	2.1388	0.00309677	0.371962	5.04346	1.98224	0.00175568	0.526916	4.55002	5.57711	0.0434954	P14743	P14743	Glycylpeptide N-tetradecanoyltransferase	XII	541937	543304
CMP2	YML057W	-1.13838	-0.197664	-0.200438	0.0232446	2N_1N;3N_1N;4N_1N	adaptation of signaling pathway;adaptation of signaling pathway by response to pheromone involved in conjugation with cellular fusion;biological regulation;cellular chemical homeostasis;cellular homeostasis;cellular ion homeostasis;cellular metabolic process;cellular process;cellular process involved in reproduction;cellular response to chemical stimulus;cellular response to stimulus;chemical hom…	calcineurin complex;cell part;intracellular part;macromolecular complex;protein complex;protein serine/threonine phosphatase complex	35826000000	20049000000	15777000000	2.59737	0.00262247	1.25962	6.7387	2.66896	0.00154951	1.31207	7.04239	3.01729	0.000118959	1.64097	8.70028	8.28363	0.0590968	P14747	P14747	Serine/threonine-protein phosphatase 2B catalytic subunit A2	XIII	160180	161994
BPT1	YLL015W	-0.586398	-0.211333	0.0990412	0.127133	4N_1N	bilirubin transport;cadmium ion transmembrane transport;cadmium ion transport;carboxylic acid transport;cation transport;cellular component organization;cellular component organization at cellular level;cellular component organization or biogenesis;cellular component organization or biogenesis at cellular level;cellular membrane fusion;cellular membrane organization;cellular process;dicarboxylic …	cell part;cytoplasmic part;fungal-type vacuole membrane;integral to membrane;intracellular organelle part;intracellular part;intrinsic to membrane;membrane;membrane part;organelle membrane;organelle part;vacuolar membrane;vacuolar part	12409000000	1801600000	10607000000	0	0.966181	0.59904	0	0	0.959927	0.972132	0	1.67964	0.00549587	1.09638	4.46614	1.67964	0.30376	P14772	P14772	Bile pigment transporter 1	XII	116432	121111
CPR1	YDR155C	0.819909	0.135755	-0.38718	-0.359285	2N_1N;3N_1N;4N_1N	anatomical structure development;anatomical structure formation involved in morphogenesis;ascospore formation;biological regulation;cell development;cell differentiation;cellular component organization;cellular component organization at cellular level;cellular component organization or biogenesis;cellular component organization or biogenesis at cellular level;cellular developmental process;cellul…	cell part;chromatin remodeling complex;chromosomal part;cytoplasmic part;histone deacetylase complex;intracellular membrane-bounded organelle;intracellular organelle;intracellular organelle part;intracellular part;macromolecular complex;membrane-bounded organelle;membrane-enclosed lumen;mitochondrial intermembrane space;mitochondrial part;nuclear chromosome part;nuclear part;nucleoplasm part;nucl…	1165100000000	610940000000	554150000000	3.79662	0	-0.348103	-13.8016	4.76774	0	-0.821167	-24.2801	5.06291	0	-0.674678	-28.8001	13.6273	0.24251	P14832	P14832	Peptidyl-prolyl cis-trans isomerase	IV	768512	769000
ARO3	YDR035W	0.0439213	-0.103188	0.611185	0.389956	2N_1N;3N_1N;4N_1N	amine biosynthetic process;amine metabolic process;aromatic amino acid family biosynthetic process;aromatic amino acid family metabolic process;aromatic compound biosynthetic process;biosynthetic process;carboxylic acid biosynthetic process;carboxylic acid metabolic process;cellular amine metabolic process;cellular amino acid biosynthetic process;cellular amino acid metabolic process;cellular aro…		86031000000	53003000000	33028000000	1.07412	0.0483749	0.227508	2.2851	3.09072	0.000675556	0.954307	9.09198	2.90144	0.00011124	0.868121	8.11353	7.06627	0.0480403	P14843	P14843	Phospho-2-dehydro-3-deoxyheptonate aldolase. phenylalanine-inhibited	IV	521816	522928
APE1	YKL103C	-0.0174883	-0.411611	-0.502859	-0.694834	4N_1N	catabolic process;cellular catabolic process;cellular macromolecule catabolic process;cellular macromolecule metabolic process;cellular metabolic process;cellular process;cellular protein catabolic process;cellular protein metabolic process;establishment of localization;establishment of protein localization;macromolecule catabolic process;macromolecule metabolic process;metabolic process;primary …	cell part;cytoplasmic part;fungal-type vacuole;intracellular membrane-bounded organelle;intracellular organelle;intracellular part;lytic vacuole;membrane-bounded organelle;organelle;storage vacuole;vacuole	32637000000	16141000000	16496000000	0.900935	0.0768625	-0.152159	-1.93134	0.7729	0.0725787	-0.142994	-1.67778	1.3579	0.0119433	-0.249668	-2.90578	3.03174	0.103545	P14904	P14904	Vacuolar aminopeptidase 1	XI	246138	247682
SEC63	YOR254C	-0.640851	-0.168996	0.132629	0.158589	2N_1N;3N_1N;4N_1N	cellular process;cotranslational protein targeting to membrane;cytosol to ER transport;establishment of localization;establishment of localization in cell;establishment of protein localization;establishment of protein localization in endoplasmic reticulum;establishment of protein localization to organelle;intracellular protein transmembrane transport;intracellular protein transport;intracellular …	cell part;cytoplasmic part;endoplasmic reticulum membrane;endoplasmic reticulum part;integral to membrane;intracellular organelle part;intracellular part;intrinsic to membrane;macromolecular complex;membrane;membrane part;nuclear inner membrane;nuclear membrane;nuclear part;organelle inner membrane;organelle membrane;organelle part;protein complex;Sec62/Sec63 complex	66426000000	36255000000	30171000000	3.44097	0.000601942	0.75938	11.1968	4.01452	0	1.09456	15.6763	4.17759	0	1.22474	17.2391	11.6331	0.139625	P14906	P14906	Protein translocation protein SEC63	XV	805032	807023
NSP1	YJL041W	0.777263	0.320576	0.0451869	-0.241883	3N_1N;4N_1N	cell cycle;cellular localization;cellular process;establishment of localization;establishment of localization in cell;establishment of organelle localization;establishment of protein localization;establishment of ribosome localization;establishment of RNA localization;intracellular protein transport;intracellular transport;localization;mRNA export from nucleus;mRNA transport;ncRNA export from nuc…	cell part;intracellular organelle part;intracellular part;macromolecular complex;membrane;membrane part;nuclear membrane;nuclear part;nuclear pore;organelle membrane;organelle part;pore complex;protein complex	279680000000	159810000000	119860000000	0.885047	0.0806259	-0.0836109	-1.89958	2.6061	0.00158412	-0.303984	-6.77512	3.54561	0	-0.514797	-11.9098	7.03675	0.0479525	P14907	P14907	Nucleoporin NSP1	X	365903	368373
MTF1	YMR228W	-0.989639	NaN	0.524665	NaN		biological regulation;biosynthetic process;cellular biosynthetic process;cellular macromolecule metabolic process;cellular metabolic process;cellular nitrogen compound metabolic process;cellular process;macromolecule metabolic process;metabolic process;nitrogen compound metabolic process;nucleic acid metabolic process;nucleobase-containing compound metabolic process;primary metabolic process;regu…	cell part;cytoplasmic part;DNA-directed RNA polymerase complex;intracellular organelle lumen;intracellular organelle part;intracellular part;macromolecular complex;membrane-enclosed lumen;mitochondrial DNA-directed RNA polymerase complex;mitochondrial intermembrane space;mitochondrial matrix;mitochondrial part;organelle envelope lumen;organelle lumen;organelle part;protein complex;RNA polymerase …	399800000	222480000	177320000	0	0.964799	NaN	0	0	0.959574	1.91254	0	0	1	NaN	0	0	0.985811	P14908	P14908	Mitochondrial transcription factor 1	XIII	724626	725651
CYC8	YBR112C	0.604949	0.0915885	-0.193742	-0.131437	3N_1N;4N_1N	biological regulation;cellular component assembly;cellular component assembly at cellular level;cellular component organization;cellular component organization at cellular level;cellular component organization or biogenesis;cellular component organization or biogenesis at cellular level;cellular macromolecular complex subunit organization;cellular process;chromatin assembly;chromatin assembly or …	cell part;intracellular membrane-bounded organelle;intracellular organelle;intracellular organelle part;intracellular part;macromolecular complex;membrane-bounded organelle;nuclear part;nucleoplasm part;nucleus;organelle;organelle part;protein complex;transcriptional repressor complex	56398000000	30974000000	25424000000	0.407915	0.383016	-0.108378	-0.961124	1.37726	0.0122646	-0.332855	-2.95045	0.871539	0.0442846	-0.213423	-1.87265	2.65672	0.135035	P14922	P14922	General transcriptional corepressor CYC8	II	462870	465770
TAL1	YLR354C	-1.47828	-0.76145	-0.409647	-0.260964	2N_1N;3N_1N;4N_1N	alcohol catabolic process;alcohol metabolic process;carbohydrate catabolic process;carbohydrate metabolic process;catabolic process;cellular carbohydrate catabolic process;cellular carbohydrate metabolic process;cellular metabolic process;cellular nitrogen compound metabolic process;cellular process;coenzyme metabolic process;cofactor metabolic process;glucose catabolic process;glucose metabolic …	cell part;cytoplasm;intracellular membrane-bounded organelle;intracellular organelle;intracellular part;membrane-bounded organelle;nucleus;organelle	679150000000	327860000000	351290000000	5.07601	0	1.04115	29.019	5.81804	0	1.46765	44.533	5.85481	0	1.73195	45.4875	16.7489	0.357353	P15019	P15019	Transaldolase	XII	836350	837357
HSC82	YMR186W	-0.827981	-0.124657	0.217465	0.203156	2N_1N;3N_1N;4N_1N	anatomical structure homeostasis;biological regulation;box C/D snoRNP assembly;cellular component assembly;cellular component assembly at cellular level;cellular component organization;cellular component organization at cellular level;cellular component organization or biogenesis;cellular component organization or biogenesis at cellular level;cellular macromolecular complex assembly;cellular macr…	cell part;cytoplasmic part;intracellular membrane-bounded organelle;intracellular organelle;intracellular part;membrane-bounded organelle;mitochondrion;organelle	2319300000000	1278500000000	1040800000000	4.03464	0	0.971095	15.8615	5.4084	0	1.39965	35.1604	5.8162	0	1.51871	44.486	15.2593	0.31898	P15108	P15108	ATP-dependent molecular chaperone HSC82	XIII	632355	634472
KRS1	YDR037W	0.0177786	0.22137	0.432957	0.376368	2N_1N;3N_1N;4N_1N	amine metabolic process;amino acid activation;carboxylic acid metabolic process;cellular amine metabolic process;cellular amino acid metabolic process;cellular ketone metabolic process;cellular macromolecule metabolic process;cellular metabolic process;cellular nitrogen compound metabolic process;cellular process;lysyl-tRNA aminoacylation;macromolecule metabolic process;metabolic process;ncRNA me…	cell part;cytoplasm;intracellular part	426260000000	261320000000	164940000000	2.24416	0.00477403	0.516409	5.39807	3.45238	0.000725	0.840183	11.2725	3.41145	0.000161616	0.902246	11.0031	9.108	0.070593	P15180	P15180	Lysine--tRNA ligase. cytoplasmic	IV	525440	527215
AMD1	YML035C	0.241031	-0.757574	0.129266	0.197784		biosynthetic process;cellular aromatic compound metabolic process;cellular biosynthetic process;cellular metabolic compound salvage;cellular metabolic process;cellular nitrogen compound biosynthetic process;cellular nitrogen compound metabolic process;cellular process;guanine biosynthetic process;guanine metabolic process;guanine salvage;heterocycle biosynthetic process;heterocycle metabolic proc…		12818000000	7196600000	5621100000	0.294671	0.566246	-0.395392	-0.727211	0.608922	0.131638	0.679505	1.35777	0.764597	0.0661503	0.830612	1.66149	1.66819	0.307118	P15274	P15274	AMP deaminase	XIII	206428	208860
SEC23	YPR181C	-0.989417	-0.807177	0.0461774	0.294864	2N_1N;3N_1N;4N_1N	biological regulation;catabolic process;cellular catabolic process;cellular metabolic process;cellular nitrogen compound catabolic process;cellular nitrogen compound metabolic process;cellular process;ER to Golgi vesicle-mediated transport;establishment of localization;establishment of localization in cell;establishment of protein localization;Golgi vesicle transport;GTP catabolic process;GTP met…	cell part;COPII vesicle coat;cytoplasmic part;cytoplasmic vesicle part;endoplasmic reticulum membrane;endoplasmic reticulum part;Golgi apparatus part;Golgi membrane;intracellular organelle part;intracellular part;macromolecular complex;membrane;membrane coat;membrane part;organelle membrane;organelle part;protein complex;vesicle coat	38349000000	21588000000	16761000000	1.08336	0.0467455	0.383322	2.30443	2.85268	0.00134149	1.29656	7.87752	3.20083	0.000135402	1.63274	9.71	7.13686	0.0487059	P15303	P15303	Protein transport protein SEC23	XVI	897361	899667
SEC11	YIR022W	-1.28325	-1.09958	0.0924137	0.263176		cellular macromolecule metabolic process;cellular metabolic process;cellular process;cellular protein metabolic process;establishment of localization;establishment of localization in cell;establishment of protein localization;establishment of protein localization in endoplasmic reticulum;establishment of protein localization to organelle;intracellular protein transport;intracellular transport;mac…	cell part;cytoplasmic part;endoplasmic reticulum;endoplasmic reticulum part;integral to membrane;intracellular membrane-bounded organelle;intracellular organelle;intracellular organelle part;intracellular part;intrinsic to membrane;macromolecular complex;membrane part;membrane-bounded organelle;organelle;organelle part;protein complex;signal peptidase complex	2551400000	993580000	1557800000	0	0.966525	0.500887	0	0	0.960957	1.7739	0	0	1	2.04082	0	0	0.985153	P15367	P15367	Signal peptidase complex catalytic subunit SEC11	IX	398733	399236
MSS116	YDR194C	-1.34389	-0.573929	0.111325	0.00602808	2N_1N;3N_1N;4N_1N	biological regulation;biosynthetic process;cellular biosynthetic process;cellular macromolecule metabolic process;cellular metabolic process;cellular nitrogen compound metabolic process;cellular process;Group I intron splicing;Group II intron splicing;macromolecule metabolic process;metabolic process;mRNA metabolic process;mRNA processing;nitrogen compound metabolic process;nucleic acid metabolic…	cell part;cytoplasmic part;intracellular organelle lumen;intracellular organelle part;intracellular part;membrane-enclosed lumen;mitochondrial matrix;mitochondrial part;organelle lumen;organelle part	29828000000	17332000000	12496000000	3.15903	0.00114865	1.17521	9.47094	4.01161	0	1.8672	15.6498	3.99277	0	1.90398	15.4787	11.1634	0.123163	P15424	P15424	ATP-dependent RNA helicase MSS116. mitochondrial	IV	845952	847946
POL3	YDL102W	-1.11008	-0.469257	0.336066	0.331477	2N_1N;3N_1N;4N_1N	biosynthetic process;catabolic process;cellular biosynthetic process;cellular catabolic process;cellular macromolecule biosynthetic process;cellular macromolecule catabolic process;cellular macromolecule metabolic process;cellular metabolic process;cellular nitrogen compound metabolic process;cellular process;DNA biosynthetic process;DNA metabolic process;DNA replication;DNA replication. removal …	cell part;chromosomal part;cytoplasmic part;cytosol;delta DNA polymerase complex;DNA polymerase complex;intracellular organelle part;intracellular part;macromolecular complex;nuclear chromosome part;nuclear part;organelle part;protein complex;replication fork	5063400000	2930300000	2133100000	2.38408	0.00349701	0.892131	5.89969	3.52591	0.000768212	1.74615	11.7724	3.51865	0.000178771	1.82384	11.7221	9.42865	0.0766984	P15436	P15436	DNA polymerase delta catalytic subunit	IV	276872	280165
GCN2	YDR283C	-1.26986	-0.435587	-0.125508	-0.0303137	4N_1N	aging;amine biosynthetic process;amine metabolic process;biological regulation;biosynthetic process;carboxylic acid biosynthetic process;carboxylic acid metabolic process;cell aging;cell cycle checkpoint;cellular amine metabolic process;cellular amino acid biosynthetic process;cellular amino acid metabolic process;cellular biosynthetic process;cellular ketone metabolic process;cellular macromolec…	cell part;cytoplasmic part;cytosolic part;cytosolic ribosome;intracellular non-membrane-bounded organelle;intracellular organelle;intracellular part;macromolecular complex;non-membrane-bounded organelle;organelle;ribonucleoprotein complex;ribosome	9606600000	5383400000	4223300000	0.5191	0.256884	0.707037	1.18214	0.857023	0.0539446	1.10729	1.84378	1.03185	0.028057	1.32342	2.19734	2.40798	0.162024	P15442	P15442	Serine/threonine-protein kinase GCN2	IV	1025070	1030049
GUK1	YDR454C	1.27915	0.424133	0.0698685	-0.147666	2N_1N;3N_1N;4N_1N	cellular metabolic process;cellular nitrogen compound metabolic process;cellular process;GMP metabolic process;heterocycle metabolic process;metabolic process;nitrogen compound metabolic process;nucleobase-containing compound metabolic process;nucleobase-containing small molecule metabolic process;nucleoside monophosphate metabolic process;nucleoside phosphate metabolic process;nucleotide metabol…		255040000000	148560000000	106480000000	2.43654	0.00324493	-0.453695	-6.09737	3.18316	0.00073906	-0.740292	-9.60826	3.59196	0	-0.873553	-12.2393	9.21166	0.0727076	P15454	P15454	Guanylate kinase	IV	1366264	1366827
IDI1	YPL117C	-0.330964	0.0224984	0.363936	0.772289	2N_1N;3N_1N;4N_1N	alcohol biosynthetic process;alcohol metabolic process;biosynthetic process;cellular biosynthetic process;cellular lipid metabolic process;cellular metabolic process;cellular process;dimethylallyl diphosphate biosynthetic process;dimethylallyl diphosphate metabolic process;farnesyl diphosphate biosynthetic process;farnesyl diphosphate metabolic process;isoprenoid biosynthetic process;isoprenoid m…	cell part;cytoplasm;intracellular part	67330000000	42539000000	24791000000	2.33086	0.00358485	0.640772	5.70457	3.24146	0.00077551	1.09625	9.94777	3.86702	0	1.57919	14.3822	9.43934	0.0769363	P15496	P15496	Isopentenyl-diphosphate Delta-isomerase	XVI	327864	328730
TRM1	YDR120C	0.698849	0.488493	0.432846	0.340003	2N_1N;3N_1N;4N_1N	cellular macromolecule metabolic process;cellular metabolic process;cellular nitrogen compound metabolic process;cellular process;macromolecule metabolic process;macromolecule methylation;macromolecule modification;metabolic process;methylation;ncRNA metabolic process;ncRNA processing;nitrogen compound metabolic process;nucleic acid metabolic process;nucleobase-containing compound metabolic proce…	cell part;cytoplasmic part;envelope;intracellular membrane-bounded organelle;intracellular organelle;intracellular organelle part;intracellular part;membrane;membrane-bounded organelle;mitochondrion;nuclear envelope;nuclear inner membrane;nuclear membrane;nuclear part;organelle;organelle envelope;organelle inner membrane;organelle membrane;organelle part	63514000000	37308000000	26207000000	1.71452	0.011784	0.0979042	3.78834	0.963346	0.0389459	0.117023	2.05713	1.25556	0.0159454	0.101559	2.67497	3.93343	0.0600022	P15565	P15565	tRNA (guanine(26)-N(2))-dimethyltransferase. mitochondrial	IV	691549	693261
FRS1	YLR060W	-0.573174	-0.114993	0.20379	0.311736	2N_1N;3N_1N;4N_1N	amine metabolic process;amino acid activation;carboxylic acid metabolic process;cellular amine metabolic process;cellular amino acid metabolic process;cellular ketone metabolic process;cellular macromolecule metabolic process;cellular metabolic process;cellular nitrogen compound metabolic process;cellular process;macromolecule metabolic process;metabolic process;ncRNA metabolic process;nitrogen c…	cell part;cytoplasmic part;intracellular part;macromolecular complex;phenylalanine-tRNA ligase complex;protein complex	272950000000	154240000000	118710000000	2.20112	0.00475158	0.788834	5.2509	3.07614	0.000663755	1.19071	9.01291	3.38969	0.000157635	1.39103	10.8623	8.66695	0.0634456	P15624	P15624	Phenylalanine--tRNA ligase beta subunit	XII	260979	262766
FRS2	YFL022C	0.0615081	0.11329	0.145415	0.27331	2N_1N;3N_1N;4N_1N	amine metabolic process;amino acid activation;carboxylic acid metabolic process;cellular amine metabolic process;cellular amino acid metabolic process;cellular ketone metabolic process;cellular macromolecule metabolic process;cellular metabolic process;cellular nitrogen compound metabolic process;cellular process;macromolecule metabolic process;metabolic process;ncRNA metabolic process;nitrogen c…	cell part;cytoplasmic part;intracellular part;macromolecular complex;phenylalanine-tRNA ligase complex;protein complex	292030000000	170240000000	121800000000	1.80899	0.0100896	0.485898	4.04622	2.10096	0.0033049	0.597012	4.92064	2.57973	0.000409178	0.816637	6.66566	6.48968	0.0456739	P15625	P15625	Phenylalanine--tRNA ligase alpha subunit	VI	93499	95010
NOP1	YDL014W	0.252263	0.0258354	0.291173	0.443952	3N_1N;4N_1N	biological regulation;box C/D snoRNA 3'-end processing;box C/D snoRNA metabolic process;box C/D snoRNA processing;cellular macromolecule metabolic process;cellular metabolic process;cellular nitrogen compound metabolic process;cellular process;macromolecule metabolic process;macromolecule methylation;macromolecule modification;metabolic process;methylation;ncRNA 3'-end processing;ncRNA metabolic …	box C/D snoRNP complex;cell part;intracellular non-membrane-bounded organelle;intracellular organelle;intracellular organelle part;intracellular part;macromolecular complex;non-membrane-bounded organelle;nuclear part;nucleolar part;nucleolus;organelle;organelle part;preribosome;ribonucleoprotein complex;small nucleolar ribonucleoprotein complex;small-subunit processome	239180000000	141420000000	97760000000	0.591335	0.1988	0.09545	1.32348	2.71137	0.00160904	0.402657	7.22785	3.28637	0.000145455	0.646377	10.2169	6.58908	0.0461119	P15646	P15646	rRNA 2-O-methyltransferase fibrillarin	IV	427364	428347
URA6	YKL024C	1.44625	0.572725	0.592295	-0.0962273	2N_1N;3N_1N;4N_1N	biosynthetic process;cellular aromatic compound metabolic process;cellular biosynthetic process;cellular metabolic process;cellular nitrogen compound biosynthetic process;cellular nitrogen compound metabolic process;cellular process;'de novo' pyrimidine base biosynthetic process;heterocycle biosynthetic process;heterocycle metabolic process;metabolic process;nitrogen compound metabolic process;nu…	cell part;cytoplasm;intracellular membrane-bounded organelle;intracellular organelle;intracellular part;membrane-bounded organelle;nucleus;organelle	50295000000	31203000000	19092000000	2.99241	0.00185556	-0.521378	-8.5711	1.75346	0.00575524	-0.381063	-3.89328	3.98229	0	-1.05714	-15.3843	8.72817	0.0638902	P15700	P15700	Uridylate kinase	XI	392526	393140
BGL2	YGR282C	-0.000534698	-0.36966	-0.288378	0.0615143	3N_1N;4N_1N	carbohydrate metabolic process;cell wall organization;cell wall organization or biogenesis;cellular cell wall organization;cellular cell wall organization or biogenesis;cellular component organization;cellular component organization or biogenesis;cellular component organization or biogenesis at cellular level;cellular process;external encapsulating structure organization;fungal-type cell wall org…	cell part;cell wall;external encapsulating structure;extracellular region;fungal-type cell wall	330420000000	172250000000	158170000000	0.544678	0.234293	-0.0322099	-1.23232	2.27961	0.0029308	0.107852	5.52173	4.40419	0	0.546277	19.6663	7.22848	0.0494452	P15703	P15703	Glucan 1.3-beta-glucosidase	VII	1057783	1058724
STI1	YOR027W	0.680227	0.286349	0.00693981	0.0926625	3N_1N	biological regulation;cellular macromolecule metabolic process;cellular metabolic process;cellular process;cellular protein metabolic process;localization;macromolecule localization;macromolecule metabolic process;metabolic process;negative regulation of catalytic activity;negative regulation of molecular function;primary metabolic process;protein folding;protein localization;protein metabolic pr…	cell part;cytoplasm;intracellular part	793790000000	462110000000	331670000000	0.204858	0.720992	-0.0379307	-0.530359	1.60313	0.00764033	-0.257192	-3.49812	0.388699	0.313634	-0.0664885	-0.922224	2.19668	0.192547	P15705	P15705	Heat shock protein STI1	XV	381053	382822
UBC4	YBR082C	1.24064	0.23965	-0.0335377	0.0392979	2N_1N;3N_1N;4N_1N	catabolic process;cellular catabolic process;cellular macromolecule catabolic process;cellular macromolecule metabolic process;cellular metabolic process;cellular process;cellular protein metabolic process;cellular response to heat;cellular response to stimulus;cellular response to stress;macromolecule catabolic process;macromolecule metabolic process;macromolecule modification;metabolic process;…	cell part;intracellular part;macromolecular complex;proteasome complex;protein complex	114780000000	67932000000	46849000000	4.59917	0	-0.672925	-22.0214	4.75833	0	-0.880181	-24.1481	4.14511	0	-0.706539	-16.9162	13.5026	0.238854	P15731	P15731	Ubiquitin-conjugating enzyme E2 4	II	406628	407169
CKA1	YIL035C	-1.20012	-0.747054	0.0481605	0.28898	2N_1N;3N_1N;4N_1N	biological regulation;cellular developmental process;cellular macromolecule metabolic process;cellular metabolic process;cellular process;cellular process involved in reproduction;cellular protein metabolic process;cellular response to stimulus;cellular response to stress;developmental process;developmental process involved in reproduction;donor selection;macromolecule metabolic process;macromole…	cell part;intracellular organelle part;intracellular part;macromolecular complex;nuclear part;nucleolar part;organelle part;protein complex;protein kinase CK2 complex;UTP-C complex	7852400000	4482700000	3369700000	1.47037	0.0177525	0.563327	3.17006	2.9182	0.000865979	1.55978	8.19611	3.26099	0.000141384	1.76569	10.064	7.64955	0.0519385	P15790	P15790	Casein kinase II subunit alpha	IX	287790	288908
MET8	YBR213W	NaN	0.733566	NaN	0.197734		amine biosynthetic process;amine metabolic process;aspartate family amino acid biosynthetic process;aspartate family amino acid metabolic process;biosynthetic process;carboxylic acid biosynthetic process;carboxylic acid metabolic process;cellular amine metabolic process;cellular amino acid biosynthetic process;cellular amino acid metabolic process;cellular biosynthetic process;cellular ketone met…		631460000	374710000	256750000	0	0.966879	NaN	0	NaN	1	0	NaN	0	1	NaN	0	NaN	0.360356	P15807	P15807	Siroheme biosynthesis protein MET8;Precorrin-2 dehydrogenase;Sirohydrochlorin ferrochelatase	II	650368	651192
POL30	YBR088C	-1.27451	-1.07512	-0.135901	0.195215	2N_1N;3N_1N;4N_1N	biological regulation;biosynthetic process;cell cycle;cell cycle process;cellular biosynthetic process;cellular component organization;cellular component organization at cellular level;cellular component organization or biogenesis;cellular component organization or biogenesis at cellular level;cellular macromolecule biosynthetic process;cellular macromolecule metabolic process;cellular metabolic …	cell part;chromosomal part;intracellular membrane-bounded organelle;intracellular organelle;intracellular organelle part;intracellular part;macromolecular complex;membrane-bounded organelle;nucleus;organelle;organelle part;PCNA complex;protein complex;replication fork	48388000000	24913000000	23475000000	2.31162	0.00351099	0.488066	5.63536	4.43917	0	1.50015	20.0698	4.8982	0	1.93462	26.184	11.649	0.140035	P15873	P15873	Proliferating cell nuclear antigen	II	424990	425766
ABP1	YCR088W	0.0617252	-0.193193	-0.525608	-0.418704	3N_1N	actin cortical patch assembly;actin cytoskeleton organization;actin filament capping;actin filament-based process;barbed-end actin filament capping;biological regulation;cellular component assembly;cellular component assembly at cellular level;cellular component organization;cellular component organization at cellular level;cellular component organization or biogenesis;cellular component organiza…	actin cortical patch;cell cortex;cell cortex part;cell part;cytoplasmic part;cytoskeletal part;intracellular organelle part;intracellular part;organelle part	329410000000	160900000000	168520000000	0.945589	0.0676396	0.123454	2.02117	1.17474	0.0212376	-0.140698	-2.49849	0.45105	0.23081	0.0616481	1.04758	2.57138	0.143107	P15891	P15891	Actin-binding protein	III	265068	266846
PRP16	YKR086W	0.689287	0.0962113	0.035881	-0.0779128		cellular component assembly;cellular component assembly at cellular level;cellular component organization;cellular component organization at cellular level;cellular component organization or biogenesis;cellular component organization or biogenesis at cellular level;cellular macromolecular complex assembly;cellular macromolecular complex subunit organization;cellular macromolecule metabolic proces…	catalytic step 2 spliceosome;cell part;intracellular organelle part;intracellular part;macromolecular complex;nuclear part;organelle part;ribonucleoprotein complex;spliceosomal complex;U2-type catalytic step 2 spliceosome;U2-type spliceosomal complex	47577000000	27589000000	19988000000	0.550831	0.228448	-0.218864	-1.31059	0	0.960603	-0.255172	0	0.507789	0.177381	-0.272807	-1.3459	1.05862	0.544032	P15938	P15938	Pre-mRNA-splicing factor ATP-dependent RNA helicase PRP16	XI	599857	603072
HSP26	YBR072W	0.587853	-1.19898	-1.23922	-1.91668	2N_1N;3N_1N;4N_1N	cellular macromolecule metabolic process;cellular metabolic process;cellular process;cellular protein metabolic process;cellular response to heat;cellular response to stimulus;cellular response to stress;macromolecule metabolic process;metabolic process;primary metabolic process;protein folding;protein metabolic process;response to abiotic stimulus;response to heat;response to stimulus;response t…	cell part;cytoplasm;cytoplasmic part;intracellular membrane-bounded organelle;intracellular non-membrane-bounded organelle;intracellular organelle;intracellular part;macromolecular complex;membrane-bounded organelle;non-membrane-bounded organelle;nucleus;organelle;ribonucleoprotein complex;RNA granule;stress granule	255140000000	89528000000	165610000000	4.04117	0	-1.53053	-15.9219	3.84312	0	-1.56171	-14.1825	3.05441	0.000121519	-1.94474	-8.89628	10.9387	0.116078	P15992	P15992	Heat shock protein 26	II	382030	382674
THR4	YCR053W	0.196484	0.112864	0.324861	0.42821	2N_1N;3N_1N;4N_1N	amine biosynthetic process;amine metabolic process;aspartate family amino acid biosynthetic process;aspartate family amino acid metabolic process;biosynthetic process;carboxylic acid biosynthetic process;carboxylic acid metabolic process;cellular amine metabolic process;cellular amino acid biosynthetic process;cellular amino acid metabolic process;cellular biosynthetic process;cellular ketone met…		468960000000	286910000000	182050000000	1.37481	0.0222903	0.392832	2.94477	2.13384	0.00325321	0.676873	5.02722	2.53521	0.000398882	0.866999	6.48431	6.04386	0.0437895	P16120	P16120	Threonine synthase	III	216697	218241
VMA2	YBR127C	-0.440494	-0.0799054	-0.0624455	-0.0633665	2N_1N;3N_1N;4N_1N	ATP hydrolysis coupled proton transport;ATP metabolic process;biological regulation;calcium ion homeostasis;cation homeostasis;cation transport;cellular calcium ion homeostasis;cellular cation homeostasis;cellular chemical homeostasis;cellular divalent inorganic cation homeostasis;cellular homeostasis;cellular ion homeostasis;cellular metabolic process;cellular metal ion homeostasis;cellular mono…	cell part;cytoplasmic part;fungal-type vacuole membrane;intracellular organelle part;intracellular part;macromolecular complex;membrane;membrane part;organelle membrane;organelle part;protein complex;proton-transporting two-sector ATPase complex. catalytic domain;proton-transporting V-type ATPase. V1 domain;vacuolar membrane;vacuolar part;vacuolar proton-transporting V-type ATPase. V1 domain	207610000000	111880000000	95722000000	3.24995	0.00130769	0.681038	9.99813	3.47898	0.000742004	0.769354	11.4509	3.7343	0	0.854226	13.3067	10.4632	0.09894	P16140	P16140	V-type proton ATPase subunit B	II	491269	492822
RPB3	YIL021W	-0.22548	0.0574491	0.0519927	0.128273	2N_1N;3N_1N;4N_1N	biosynthetic process;cellular biosynthetic process;cellular macromolecule biosynthetic process;cellular macromolecule metabolic process;cellular metabolic process;cellular nitrogen compound metabolic process;cellular process;macromolecule biosynthetic process;macromolecule metabolic process;metabolic process;nitrogen compound metabolic process;nucleic acid metabolic process;nucleobase-containing …	cell part;DNA-directed RNA polymerase complex;DNA-directed RNA polymerase II. core complex;intracellular organelle part;intracellular part;macromolecular complex;nuclear DNA-directed RNA polymerase complex;nuclear part;nucleoplasm;nucleoplasm part;organelle part;protein complex;RNA polymerase complex	10033000000	5842000000	4191000000	1.46951	0.0178351	0.473622	3.16801	1.6535	0.00676402	0.528419	3.62758	2.00414	0.0015562	0.71116	4.61676	5.12715	0.0447099	P16370	P16370	DNA-directed RNA polymerase II subunit RPB3	IX	312905	313861
PDA1	YER178W	-0.293091	-0.271945	-0.0628393	0.0789301	3N_1N;4N_1N	acetyl-CoA biosynthetic process;acetyl-CoA biosynthetic process from pyruvate;acetyl-CoA metabolic process;alcohol catabolic process;alcohol metabolic process;biosynthetic process;carbohydrate catabolic process;carbohydrate metabolic process;carboxylic acid metabolic process;catabolic process;cell growth;cellular biosynthetic process;cellular carbohydrate catabolic process;cellular carbohydrate m…	cell part;cytoplasmic part;intracellular membrane-bounded organelle;intracellular non-membrane-bounded organelle;intracellular organelle;intracellular organelle part;intracellular part;macromolecular complex;membrane-bounded organelle;mitochondrial nucleoid;mitochondrial part;mitochondrial pyruvate dehydrogenase complex;mitochondrion;non-membrane-bounded organelle;nucleoid;organelle;organelle par…	99673000000	52719000000	46954000000	0.810536	0.100847	0.241809	1.7518	1.76551	0.00566916	0.54468	3.92613	2.28706	0.000436482	0.76093	5.54802	4.86311	0.0461513	P16387	P16387	Pyruvate dehydrogenase E1 component subunit alpha. mitochondrial	V	546817	548079
PDX1	YGR193C	0.408899	0.174294	-0.26164	-0.16646		acetyl-CoA biosynthetic process;acetyl-CoA biosynthetic process from pyruvate;acetyl-CoA metabolic process;biosynthetic process;carboxylic acid metabolic process;cellular biosynthetic process;cellular ketone metabolic process;cellular metabolic process;cellular process;coenzyme biosynthetic process;coenzyme metabolic process;cofactor biosynthetic process;cofactor metabolic process;metabolic proce…	cell part;cytoplasmic part;intracellular organelle part;intracellular part;macromolecular complex;mitochondrial part;mitochondrial pyruvate dehydrogenase complex;organelle part;protein complex;pyruvate dehydrogenase complex	114560000000	59482000000	55074000000	0.861897	0.0865234	0.192254	1.85346	0.609113	0.131482	-0.143275	-1.35814	0.0770485	0.935473	0.022113	0.218911	1.54806	0.343348	P16451	P16451	Pyruvate dehydrogenase complex protein X component. mitochondrial	VII	884509	885741
PDC5	YLR134W	-0.633091	-1.07219	-0.639465	-2.11705		alcohol biosynthetic process;alcohol catabolic process;alcohol metabolic process;amine catabolic process;amine metabolic process;amino acid catabolic process to alcohol via Ehrlich pathway;amino acid catabolic process via Ehrlich pathway;aromatic amino acid family catabolic process;aromatic amino acid family catabolic process to alcohol via Ehrlich pathway;aromatic amino acid family metabolic pro…	cell part;cytoplasm;intracellular membrane-bounded organelle;intracellular organelle;intracellular part;membrane-bounded organelle;nucleus;organelle	8405400000	3293400000	5111900000	0.142226	0.825838	0.204043	0.383686	0.479821	0.216797	0.557782	1.1047	0.426471	0.259719	-0.543887	-0.998452	1.04852	0.548969	P16467	P16467	Pyruvate decarboxylase isozyme 2	XII	410723	412414
KAR2	YJL034W	-0.383024	-0.033721	-0.160151	-0.471551	2N_1N;3N_1N;4N_1N	catabolic process;cellular catabolic process;cellular component organization;cellular component organization at cellular level;cellular component organization or biogenesis;cellular component organization or biogenesis at cellular level;cellular macromolecule catabolic process;cellular macromolecule metabolic process;cellular metabolic process;cellular process;cellular process involved in reprodu…	cell part;cytoplasmic part;endoplasmic reticulum;endoplasmic reticulum part;intracellular membrane-bounded organelle;intracellular organelle;intracellular organelle part;intracellular part;luminal surveillance complex;macromolecular complex;membrane-bounded organelle;organelle;organelle part;protein complex	743480000000	377430000000	366040000000	2.72395	0.00203711	0.690537	7.28371	2.47936	0.00177304	0.600177	6.26282	1.88868	0.00268583	0.405745	4.27276	7.09199	0.048407	P16474	P16474	78 kDa glucose-regulated protein homolog	X	381327	383375
YEF3	YLR249W	-0.37831	-0.126341	0.354317	0.377491	2N_1N;3N_1N;4N_1N	biosynthetic process;cellular biosynthetic process;cellular component disassembly;cellular component disassembly at cellular level;cellular component organization;cellular component organization at cellular level;cellular component organization or biogenesis;cellular component organization or biogenesis at cellular level;cellular macromolecular complex disassembly;cellular macromolecular complex …	cell part;cytoplasmic part;cytosolic part;cytosolic ribosome;intracellular non-membrane-bounded organelle;intracellular organelle;intracellular part;macromolecular complex;non-membrane-bounded organelle;organelle;ribonucleoprotein complex;ribosome;RNA granule;stress granule	2656900000000	1533600000000	1123300000000	2.41145	0.00338132	0.608947	6.00212	3.5796	0.000809302	1.18499	12.1506	3.72434	0	1.31051	13.2291	9.71538	0.0821365	P16521;P53978	P16521	Elongation factor 3A	XII	636780	639914
OM45	YIL136W	0.475923	-0.655523	-1.01649	-1.35109	2N_1N;3N_1N;4N_1N		cell part;cytoplasmic part;integral to membrane;integral to mitochondrial membrane;integral to mitochondrial outer membrane;integral to organelle membrane;intracellular membrane-bounded organelle;intracellular organelle;intracellular organelle part;intracellular part;intrinsic to membrane;intrinsic to mitochondrial outer membrane;intrinsic to organelle membrane;membrane;membrane part;membrane-bou…	80971000000	31549000000	49421000000	2.7847	0.00219556	-0.833402	-7.55877	3.1435	0.000711388	-1.17975	-9.38355	3.62467	0	-1.4362	-12.477	9.55288	0.078426	P16547	P16547	Mitochondrial outer membrane protein OM45	IX	93619	94800
APA1	YCL050C	-0.238676	0.255952	0.49929	0.570114	2N_1N;3N_1N;4N_1N	biosynthetic process;catabolic process;cellular biosynthetic process;cellular catabolic process;cellular metabolic process;cellular nitrogen compound biosynthetic process;cellular nitrogen compound catabolic process;cellular nitrogen compound metabolic process;cellular process;heterocycle catabolic process;heterocycle metabolic process;metabolic process;nitrogen compound metabolic process;nucleob…		216460000000	134450000000	82005000000	2.3574	0.00352464	0.733285	5.8012	3.00189	0.000928177	1.06093	8.62009	3.26211	0.000141593	1.23176	10.0707	8.6214	0.062973	P16550	P16550	Protein APA1;5.5-P-1.P-4-tetraphosphate phosphorylase;ADP-sulfurylase	III	37836	38801
NCP1	YHR042W	-0.841455	-0.719099	0.0793969	0.0146181	2N_1N;3N_1N;4N_1N	alcohol biosynthetic process;alcohol metabolic process;biosynthetic process;cellular alcohol biosynthetic process;cellular alcohol metabolic process;cellular biosynthetic process;cellular metabolic process;cellular process;ergosterol biosynthetic process;ergosterol metabolic process;lipid biosynthetic process;lipid metabolic process;metabolic process;phytosteroid biosynthetic process;phytosteroid…	cell part;cytoplasmic part;endoplasmic reticulum membrane;endoplasmic reticulum part;integral to membrane;intracellular organelle part;intracellular part;intrinsic to membrane;membrane;membrane part;mitochondrial membrane;mitochondrial outer membrane;mitochondrial part;organelle membrane;organelle outer membrane;organelle part;outer membrane;plasma membrane	27212000000	14570000000	12642000000	2.01195	0.00697131	0.550876	4.64075	4.12748	0	1.36559	16.7434	4.2604	0	1.38574	18.09	10.3998	0.0979426	P16603	P16603	NADPH--cytochrome P450 reductase	VIII	190543	192618
HEM15	YOR176W	-0.837967	-0.515076	-0.322545	-0.153607	2N_1N;3N_1N;4N_1N	biosynthetic process;cellular biosynthetic process;cellular metabolic process;cellular nitrogen compound biosynthetic process;cellular nitrogen compound metabolic process;cellular process;cofactor biosynthetic process;cofactor metabolic process;heme biosynthetic process;heme metabolic process;heterocycle biosynthetic process;heterocycle metabolic process;metabolic process;nitrogen compound metabo…	cell part;cytoplasmic part;intracellular organelle part;intracellular part;membrane;mitochondrial inner membrane;mitochondrial membrane;mitochondrial part;organelle inner membrane;organelle membrane;organelle part	61522000000	32222000000	29300000000	2.93018	0.00173506	0.663969	8.25563	3.53964	0.000778523	0.930223	11.868	3.7727	0	1.14595	13.6096	10.2425	0.0951571	P16622	P16622	Ferrochelatase. mitochondrial	XV	662401	663582
TUP1	YCR084C	-0.831727	-0.401908	-0.0747339	0.0852592	2N_1N;3N_1N;4N_1N	ATP-dependent chromatin remodeling;biological regulation;carbon catabolite regulation of transcription;carbon catabolite regulation of transcription from RNA polymerase II promoter;carbon catabolite repression of transcription;carbon catabolite repression of transcription from RNA polymerase II promoter;cell communication;cellular component assembly;cellular component assembly at cellular level;c…	cell part;intracellular membrane-bounded organelle;intracellular organelle;intracellular organelle part;intracellular part;macromolecular complex;membrane-bounded organelle;nuclear part;nucleoplasm part;nucleus;organelle;organelle part;protein complex;transcriptional repressor complex	80704000000	42754000000	37949000000	2.01079	0.00696391	0.795515	4.63718	2.8679	0.00120446	1.24337	7.95052	3.12498	0.000129206	1.48242	9.28024	8.00367	0.0557852	P16649	P16649	General transcriptional corepressor TUP1	III	260311	262452
ALG1	YBR110W	0.104967	-0.287622	0.355054	0.0905076	3N_1N;4N_1N	carbohydrate metabolic process;cellular carbohydrate metabolic process;cellular lipid metabolic process;cellular macromolecule metabolic process;cellular metabolic process;cellular oligosaccharide metabolic process;cellular process;cellular protein metabolic process;glycosylation;lipid metabolic process;macromolecule glycosylation;macromolecule metabolic process;macromolecule modification;metabol…	cell part;cytoplasmic part;endoplasmic reticulum;endoplasmic reticulum membrane;endoplasmic reticulum part;integral to membrane;intracellular membrane-bounded organelle;intracellular organelle;intracellular organelle part;intracellular part;intrinsic to membrane;membrane;membrane part;membrane-bounded organelle;organelle;organelle membrane;organelle part	4027800000	2395900000	1631900000	0.0330393	0.971497	-0.0111207	-0.0998718	1.933	0.00424047	0.600495	5.52722	1.30319	0.0138847	0.54738	3.18893	3.26923	0.0884122	P16661	P16661	Chitobiosyldiphosphodolichol beta-mannosyltransferase	II	458872	460221
RGP1	YDR137W	NaN	-0.525235	-0.0348579	0.320877		biological regulation;cell cycle phase;cell cycle process;cell division;cellular component organization;cellular component organization at cellular level;cellular component organization or biogenesis;cellular component organization or biogenesis at cellular level;cellular process;endosome transport;establishment of localization;establishment of localization in cell;intracellular transport;mitosis…	cell part;cytoplasmic part;Golgi apparatus;Golgi apparatus part;Golgi membrane;guanyl-nucleotide exchange factor complex;intracellular membrane-bounded organelle;intracellular organelle;intracellular organelle part;intracellular part;macromolecular complex;membrane;membrane-bounded organelle;organelle;organelle membrane;organelle part;protein complex;Ric1p-Rgp1p complex	2088300000	884000000	1204300000	0	0.967912	NaN	0	0	0.958545	NaN	0	0	1	NaN	0	0	1	P16664	P16664	Guanine nucleotide exchange factor subunit RGP1	IV	728259	730250
PFK1	YGR240C	-0.598265	-0.106849	0.134418	0.0583216	2N_1N;3N_1N;4N_1N	alcohol catabolic process;alcohol metabolic process;carbohydrate catabolic process;carbohydrate metabolic process;carbohydrate phosphorylation;catabolic process;cation transport;cellular carbohydrate catabolic process;cellular carbohydrate metabolic process;cellular metabolic process;cellular process;establishment of localization;fructose 6-phosphate metabolic process;fructose metabolic process;g…	6-phosphofructokinase complex;cell part;cytoplasmic part;cytosolic part;intracellular membrane-bounded organelle;intracellular organelle;intracellular organelle part;intracellular part;macromolecular complex;membrane;membrane-bounded organelle;mitochondrial membrane;mitochondrial outer membrane;mitochondrial part;mitochondrion;organelle;organelle membrane;organelle outer membrane;organelle part;o…	544710000000	296140000000	248570000000	3.79719	0	0.823343	13.8062	4.22892	0	1.14828	17.7619	4.40495	0	1.1413	19.675	12.4311	0.174227	P16861	P16861	ATP-dependent 6-phosphofructokinase subunit alpha	VII	970771	973734
[truncated: 2,719 more rows]

## Sheet: Outliers
FigS3A	TOP25 Up							FigS3B	TOP25 Down
[truncated: 53 more rows]
