# Supplementary material for: Scaling of cellular proteome with ploidy
Source: Research Square preprint supplement (doi:10.21203/rs.3.rs-1159832/v1), 2022-01-04
Supplement: Supplementary file 4 [file de2c11aeaa2d889ea606af3f.xlsx]

## Sheet: UP_GOBP_Proteome
Term	P-value	Adjusted P-value	Old P-value	Old Adjusted P-value	Z-score	Combined Score	Genes	Enrichment
vesicle-mediated transport (GO:0016192)	2.22e-35	1.12e-32	0.0535812	0.80972	-1.70199	135.807	SEC22;SEC7;PKH1;VPS29;NYV1;ARF2;GDI1;SEC4;FAB1;LSP1;RVS167;SLA2;SLA1;SIW14;YPT6;YPT7;DNF1;DDI1;VPS30;NEO1;YPT1;TDA3;SEC17;SEC18;YSC84;AGE2;SVL3;YPT31;WHI2;VRP1;PEP8;VPS21;KES1;PIL1;PEP5;VPS27;JJJ1;ARL1;EFM4;APL4;APL1;GTS1;APL2;MYO2;SNC1;CDC42;VPS1;VPS4;MYO3;VPS5;HRR25;MYO5;VPS53;SSA2;LSB5;RHO5;VPS13;RTT10;YKT6;VPS17;YOP1;ACT1;RIC1;SED5;ENT1;VTA1;ENT2;ENT4;OSH3;SWH1;OSH2;CHC1;YPT52;RVS161;GVP36;GY…	Upregulated
intracellular protein transport (GO:0006886)	2.4e-31	5.17e-29	0.0271978	0.699246	-1.84446	130.045	VPS29;ARF2;POM34;NUP188;NUP145;SEC4;SEC27;WTM1;KAP123;BRO1;SXM1;YPT6;YPT7;DNF1;EMP24;YPT1;POM152;NUP133;SEC17;SRP1;RTG2;CRM1;YPT31;NUP53;PEP8;NUP57;VPS21;PMT2;PMT1;RSP5;APL5;ARL1;SAR1;KAP104;GGA2;NUP82;GGA1;COP1;MDR1;NUP84;VPS17;NUP159;NUP116;CSE1;RIC1;SED5;NUP157;NIC96;KAP95;MSN5;PSE1;RNA1;ACC1;ERP1;ERP2;GSP2;IWR1;NAP1;NPA3;ERP4;YPT52;GYP5;YPT10;GYP6;BCP1;SEC31	Upregulated
ribosome biogenesis (GO:0042254)	8.45e-42	1.28e-38	0.0021704	0.391535	-1.36901	129.473	PRP43;RRP7;RPL3;POP1;SRM1;PIH1;RRP1;PWP1;RPS0A;RPL7A;NOB1;NEW1;ZUO1;TMA108;DIS3;RPS5;IMP4;AFG2;NSA1;LSG1;XRN1;SSB2;RPP1;SQS1;ERB1;ARB1;ECM16;RNT1;UTP22;JJJ1;UTP21;JIP5;NOP1;NOP2;RRB1;NOP7;IPI1;PUF6;CBF5;SSZ1;EMG1;RVB2;IPI3;SEN1;HAS1;HRR25;MDV1;GLC7;RPS3;KRE33;MOT1;RPS2;MDN1;NOP56;MRT4;RLI1;KRR1;TMA64;SGD1;REX4;ENP1;RAT1;RNA1;SSD1;DRS1;MAK21;GSP2;RIX7;NOC2;NOC4;RIX1;YTM1;PAF1;REH1;BFR2;NGL2;UTP30;…	Upregulated
rRNA processing (GO:0006364)	3.32e-38	2.51e-35	0.000358106	0.270549	-1.46775	126.666	PRP43;RRP7;RPL3;RRP5;POP1;DIP2;PIH1;RRP1;PWP1;RPL7A;NOB1;ZUO1;RIO1;DIS3;IMP4;CIC1;SNU66;MTR4;XRN1;SSB2;RPP1;SQS1;ERB1;RNT1;UTP22;JJJ1;UTP21;NOP1;NOP2;IPI1;CBF5;SSZ1;EMG1;RVB2;IPI3;SEN1;HAS1;RPL1B;GLC7;MOT1;MDN1;NOP56;MRT4;KRR1;ROK1;TMA64;DIM1;REX4;SPB4;ENP1;RAT1;SSD1;DRS1;RPL8B;NOC4;RIX1;YTM1;PAF1;BFR2;NGL2;UTP30;RPL8A;DBP2	Upregulated
Golgi vesicle transport (GO:0048193)	5.62e-30	1.06e-27	0.0143192	0.593908	-1.6812	113.231	SEC22;SEC7;SEC21;SEC23;SEC26;SEC28;SEC27;ELO3;MRS6;YPT6;VPS74;CDC28;EMP24;GET1;GET3;PHO86;GET2;NEO1;YPT1;COG8;COG6;SEC14;COG4;SEC17;COG1;SEC18;AGE2;YPT31;GRH1;SLY1;TED1;GCS1;KES1;TIP20;YET1;YET3;GTS1;SAR1;GEA2;SNX4;COP1;RUD3;HRR25;YIP3;EMP47;YKT6;SED5;ERP1;ERP2;CDC1;ERP4;ERV41;GYL1;GYP5;RET2;ERV46;VPS45;SEC31;BET1	Upregulated
ncRNA processing (GO:0034470)	1.55e-34	5.84e-32	0.000277624	0.270549	-1.4493	112.832	PRP43;RRP7;RPL3;POP1;PIH1;RRP1;PWP1;MRPL3;ZUO1;DIS3;RRP43;RRP40;IMP4;PTA1;CEG1;XRN1;SSB2;RPP1;SQS1;ERB1;RNT1;UTP22;JJJ1;STO1;UTP21;NOP1;CSL4;IPI1;CBF5;SSZ1;EMG1;RVB2;IPI3;SEN1;HAS1;GLC7;MOT1;MDN1;NOP56;MRT4;KRR1;TMA64;REX4;ENP1;RAT1;SSD1;DRS1;NOC4;RIX1;PAF1;BFR2;NGL2;DBP2	Upregulated
rRNA metabolic process (GO:0016072)	6.36e-32	1.6e-29	0.00063246	0.318549	-1.49349	107.282	PRP43;RRP7;RPL3;POP1;PIH1;RRP1;PWP1;ZUO1;DIS3;RRP43;IMP4;MTR4;XRN1;SSB2;RPP1;SQS1;RRP45;ERB1;RNT1;UTP22;JJJ1;UTP21;NOP1;IPI1;CBF5;SSZ1;EMG1;RVB2;IPI3;SEN1;HAS1;GLC7;MOT1;MDN1;NOP56;MRT4;KRR1;TMA64;REX4;ENP1;RAT1;SSD1;DRS1;RSC9;NOC4;RIX1;PAF1;BFR2;NGL2;DBP2	Upregulated
translation (GO:0006412)	1.29e-32	3.91e-30	0.446018	0.999856	-1.39879	102.707	MRPS17;RPL5;VAS1;RPL3;RPS4B;MRPL35;NPL3;RPS0A;YEF3;MRPL3;RPL7A;MRPL1;MRPL40;MRPL8;MRPL7;RPL18B;THS1;MRPL6;SUP45;HBS1;LHS1;MRPL9;EFT1;TAE1;MRPS28;ARC1;RIA1;VAR1;GIR2;TYS1;PET123;RPS5;MST1;SUP35;CIC1;TPA1;RSM7;MRPS5;AFG3;TRM7;MRPS9;SSB2;MTF2;RPP0;MRP51;MRPS35;RPL10;RSM24;RSM25;TIF3;RSM23;MRPL16;MRPL17;MRPL15;TUF1;IMG1;MRP13;MRPL10;MRPL11;SSZ1;TMA19;RPL1B;YML6;RPS3;RSM28;RSM26;NAM9;RBG1;RBG2;DOM34;R…	Upregulated
proteasomal protein catabolic process (GO:0010498)	1.99e-24	2.31e-22	0.0014096	0.379202	-1.86174	101.602	RSP5;RPN7;PUP2;PUP1;RPN5;RPN2;RPN10;RPT6;RPN1;PUP3;UBX5;NPL4;RPN8;SCL1;RAD23;CDC48;CUZ1;SSA2;RPN12;RPN11;UFD1;MOT2;PRE2;PRE1;PRE10;PRE8;PRE7;CDC34;PRE9;PRE4;PRE6;GID8;PRE5;DOA1;RKR1	Upregulated
regulation of transcription from RNA polymerase II promoter (GO:0006357)	6.48e-28	1.09e-25	0.838035	0.999856	-1.52026	95.1738	GIS1;CAF16;UME1;TFB3;TUP1;TFB1;WTM1;RPD3;OPI1;IKI3;MGA2;EMI2;ABF1;RCO1;CDC28;CCR4;PHO85;MED2;NUP133;HOS3;SKN7;SPT8;TRA1;RTG2;HDA1;HOG1;RGR1;CEG1;CDC39;LAP3;TOP1;SKO1;PAH1;RSP5;HIR1;YAP3;ASF1;ARP9;NOT3;ARP7;ISW1;NOT5;CTR9;RTR1;SGV1;SWI3;GTS1;ARP4;SWI1;RVB2;SFP1;RAD23;GAL11;RVB1;NUP84;SWI6;HSF1;GLC7;SPT5;YTA7;SPT6;CCL1;SFH1;MOT1;SIN3;SNF2;ZAP1;PDC2;YAK1;MSN4;EAF3;ELP2;KTI12;SRB2;ELP3;BMH1;ELP4;INO8…	Upregulated
endocytosis (GO:0006897)	2.11e-27	3.19e-25	0.00554928	0.45765	-1.44978	89.0508	RSP5;PKH1;ECM21;JJJ1;ARL1;GTS1;LSP1;ROD1;RVS167;SLA2;SLA1;SNC1;CDC42;SIW14;VPS1;SWA2;YPT7;MYO3;VPS5;DNF1;HRR25;MYO5;LSB5;RHO5;NEO1;ACT1;ENT1;ENT2;ENT4;YSC84;OSH3;SWH1;OSH2;CHC1;AGE2;SVL3;ARC35;YPT52;RVS161;WHI2;GVP36;VRP1;OSH7;OSH6;END3;VPS21;KES1;PIL1	Upregulated
regulation of transcription, DNA-templated (GO:0006355)	2.88e-24	3.11e-22	0.231022	0.909049	-1.5697	85.0828	CAF16;HMT1;TFB3;NUP145;CKB2;NPL6;RPD3;OPI1;IKI3;MSA2;SET2;CDC28;CCR4;PHO85;CTI6;SEC13;NUP133;HOS3;YKR023W;RTG2;STH1;RGR1;NUP53;CDC39;TOP1;HIR1;YAP3;NOT3;NOT5;CTR9;GTS1;ARP4;SWI1;RVB2;RSC30;RVB1;NUP84;HSF1;SPT5;SFH1;MOT1;SIN3;SNT1;MLP2;CKA2;CKA1;EAF3;ELP2;KTI12;SRB2;ELP3;ELP4;SNF4;RSC8;RSC9;HXK2;RSC3;SRB4;CHS5;PAF1;FCP1	Upregulated
cellular protein localization (GO:0034613)	1.84e-20	1.12e-18	0.130969	0.879386	-1.80563	82.0465	VPS29;ARF2;HAL5;SEC4;APL5;SEC27;ARL1;RAS2;NVJ1;SAR1;JSN1;YPT6;COP1;MDR1;YPT7;DNF1;EMP24;BUD4;SEH1;YPT1;VPS17;RIC1;SED5;BCY1;RTS1;SEC17;HDA1;CDC3;ERP1;ERP2;YPT31;CDC10;ERP4;YPT52;CDC11;CDC55;PPZ1;CDC12;SHS1;GYP5;YPT10;PEP8;GSF2;GYP6;VPS21;SEC31	Upregulated
transcription from RNA polymerase II promoter (GO:0006366)	9.84e-26	1.35e-23	0.0315796	0.769624	-1.39313	80.2174	TFB3;TFB1;NPL6;RPD3;CHD1;CDC73;MFT1;RCO1;CCR4;STH1;SUB2;CDC39;TOP1;HIR1;BRE1;ARP9;ARP7;ISW1;NOT5;CTR9;ISW2;RTR1;RPB2;RPB3;SGV1;SPT16;SPT15;SEN1;RSC30;RPB5;SPT5;SPT6;CCL1;SFH1;TAF12;EAF3;RSC1;INO80;RSC58;RSC8;RSC9;THP2;RSC4;RSC2;RSC3;SRB4;PAF1;RPO21;TAF5;TAF4;TAF2;TAF1	Upregulated
cellular protein modification process (GO:0006464)	6.13e-24	6.17e-22	0.44811	0.999856	-1.491	79.6926	PKH2;HAL5;CKB2;PPH21;GDA1;SIW14;AKL1;CDC28;PSY4;PHO85;RCK2;RIO1;GCN2;KIN2;MNN2;KIN1;ALG9;CLA4;RTS1;GIN4;ALG12;GAL83;ALG1;GTT1;MNN5;PKC1;PSK1;CMK2;RTK1;CMK1;PSK2;HOG1;PHO13;FPK1;PPZ1;RIM11;YPK1;DBF2;YPK2;KKQ8;PSR2;SGV1;MNN11;SLT2;DUN1;RAD23;HRR25;GLC7;SNF1;PMI40;GLR1;TPK1;CKA2;OST3;CKA1;YAK1;SNF4;YVH1;HRK1;CDC55;NTA1;PTC5;PSA1;PTC2;MCK1;PPT1;PTC7	Upregulated
DNA-templated transcription, elongation (GO:0006354)	7e-22	5.47e-20	0.00514529	0.45765	-1.60875	78.3632	HIR1;ARP9;ARP7;ISW1;NOT5;CTR9;NPL6;SGV1;RPD3;SPT16;CHD1;CDC73;MFT1;MSS116;RCO1;RSC30;SET2;SPT5;SFH1;CCR4;EAF3;RSC1;STH1;RSC58;RSC8;RSC9;THP2;RSC4;SUB2;RSC2;RSC3;CDC39;PAF1;TOP1	Upregulated
positive regulation of transcription, DNA-templated (GO:0045893)	2.1e-23	1.98e-21	0.639894	0.999856	-1.49285	77.9523	GIS1;UME1;NUP145;TUP1;WTM1;RPD3;OPI1;ASP1;MGA2;EMI2;ABF1;RCO1;CDC28;ADR1;UTP15;CTI6;MED2;SEC13;NUP133;HOS3;YKR023W;SPT8;TRA1;RTG2;HDA1;HOG1;NAN1;RGR1;CEG1;NUP53;PAH1;RSP5;ARP9;ARP7;ISW1;SWI4;SGV1;SWI3;GTS1;SWI1;SFP1;GAL11;NUP84;SWI6;HSF1;YTA7;SPT6;CCL1;SIN3;UTP8;SNF2;ZAP1;UTP5;UTP4;PDC2;YAK1;MSN4;SRB2;INO80;MSN2;UTP9;CDC55;CGI121;RAP1;RSC3;SRB4;TAF4;CAM1;TAF2;TAF1;TAP42	Upregulated
positive regulation of transcription from RNA polymerase II promoter (GO:0045944)	5.51e-25	6.94e-23	0.701938	0.999856	-1.35657	75.7751	GIS1;HMT1;UME1;TUP1;RPT6;FHL1;WTM1;RPD3;OPI1;NPL3;CDC73;MGA2;EMI2;ABF1;RCO1;CDC28;ADR1;CCR4;CET1;GCN5;MED2;MOT2;NUP133;HOS3;SPT8;TRA1;RTG2;HDA1;HOG1;RGR1;CEG1;XRN1;CDC39;RPT4;PAH1;RSP5;ASF1;ARP9;NOT3;ARP7;ISW1;NOT5;SGV1;SWI3;GTS1;SPT16;SWI1;SFP1;GAL11;NUP84;SWI6;HSF1;SPT5;YTA7;SPT6;CCL1;SIN3;SNF2;ZAP1;BCY1;PDC2;YAK1;MSN4;SRB2;INO80;ETT1;MSN2;NAP1;RSC6;CGI121;RAP1;RSC3;SRB4;PAF1;TAF4;CAM1;TAF2;TAF1	Upregulated
ubiquitin-dependent protein catabolic process (GO:0006511)	7.24e-22	5.47e-20	0.0973483	0.847911	-1.55181	75.5372	RPN6;RSP5;RPN7;PUP2;PUP1;RPN5;RPN2;RPN3;RPN10;RPT6;RPN1;UBP2;BRO1;PUP3;UBX5;NPL4;RPN8;RPN9;SCL1;RAD23;CDC48;CUZ1;NAS2;DDI1;SSA2;RPN12;TOM1;UFD2;RPN11;UFD1;YDJ1;PRE2;PRE1;PRE10;PRE8;PRE7;CDC34;PRE9;PRE4;PRE6;GID8;PRE5;RPT5;RPT2;UBA1;DOA1;RPT3;RKR1	Upregulated
ribosomal large subunit biogenesis (GO:0042273)	5.36e-22	4.5e-20	0.0448484	0.770068	-1.53111	74.9896	PRP43;RPL5;RPL3;RPL10;JJJ1;JIP5;NOP2;NOP7;RPF2;IPI1;PUF6;RPL7A;IPI3;MRPL7;HAS1;HRR25;MDV1;RPL1B;MDN1;MRT4;RLI1;REX4;SPB4;SSF2;CIC1;DRS1;MAK21;SSF1;AFG2;YVH1;RIX7;NSA1;RPL8B;LSG1;RSA4;NOC2;RIX1;YTM1;RPP0;REH1;UTP30;ERB1;MAK5;RPL8A	Upregulated
proteolysis involved in cellular protein catabolic process (GO:0051603)	4.25e-20	2.29e-18	0.00207744	0.391535	-1.68094	74.9772	MCA1;PUP2;PUP1;YME1;PUP3;KEX1;SCL1;PIM1;MDJ1;MGR1;MGR3;MOT2;CYM1;PRE2;PRE1;PRE10;PRE8;PRE7;PRE9;PRE4;PRC1;PRE6;PRE5;PEP4;STE23;RKR1	Upregulated
protein catabolic process (GO:0030163)	3.81e-18	1.51e-16	0.00322595	0.443128	-1.79369	71.9434	ASK10;PUP2;PUP1;MOT2;PRE2;CIC1;MCX1;PRE1;PUP3;PRE10;PRE8;PRE7;NTA1;PRE9;SCL1;LAP2;PRE4;PRE6;PRE5;CDC28;MCK1;NMA111;RKR1	Upregulated
maturation of SSU-rRNA from tricistronic rRNA transcript (SSU-rRNA, 5.8S rRNA, LSU-rRNA) (GO:0000462)	7.35e-21	5.05e-19	0.0655641	0.83674	-1.48419	68.8064	FAL1;PRP43;RRP5;UTP22;RRP3;DIP2;NOP7;NOP9;RPS0A;EMG1;NOB1;BMS1;HAS1;TOM1;UTP20;RIO1;UTP15;UTP8;UTP7;NOP58;UTP6;UTP5;UTP4;KRR1;PNO1;ROK1;UTP13;DIM1;ENP1;RPS1A;UTP18;RPS1B;UTP9;RCL1;MRPS9;NAN1;MRD1;NOC4;DBP8;TSR1;BFR2;UTP30;ECM16	Upregulated
mitochondrial gene expression (GO:0140053)	1.77e-20	1.11e-18	0.0788889	0.83674	-1.49496	67.9911	MRPS17;MRP51;MRPS35;RSM24;RSM25;RSM23;MRPL16;MRPL17;MRPL15;TUF1;IMG1;MRPL35;MRP13;MRPL10;MRPL11;MRPL3;MRPL1;MRPL40;MRPL8;MSS116;MRPL7;MRPL6;YML6;RSM28;RSM26;MRPL9;NAM9;MRPS28;RSM10;MRP1;VAR1;TYS1;PET123;MEF1;HTS1;MRP7;MRP4;MRPL24;RSM7;MRPS5;MRPL22;MRPS9;MTF2	Upregulated
chromatin remodeling (GO:0006338)	3.61e-22	3.21e-20	0.0142565	0.593908	-1.36586	67.4357	ARP9;ARP7;ISW1;RPT6;ISW2;ARP5;NPL6;SWI3;ARP4;SWI1;CHD1;ABF1;RVB2;IOC4;RSC30;RVB1;VPS72;IOC2;SPT6;SFH1;ITC1;SNF2;GCN5;MSN4;RSC1;INO80;STH1;MSN2;RSC58;RSC8;RSC9;RSC6;RSC4;RSC2;RSC3;IES1;TOP2;TOP1;FUN30	Upregulated
actin filament organization (GO:0007015)	1.27e-17	4.47e-16	0.00731231	0.45765	-1.70117	66.1825	SAC6;TWF1;ARP3;BNI1;PPH21;SLA2;ARP2;CDC42;SIW14;AKL1;ARC40;LSB5;RHO5;RHO3;SRV2;RHO1;RHO2;RGA1;ENT1;ENT2;ENT4;YSC84;PKC1;WHI2;END3	Upregulated
proteasome-mediated ubiquitin-dependent protein catabolic process (GO:0043161)	8.72e-22	6.27e-20	0.182132	0.879386	-1.36008	65.9527	PUP2;PUP1;RPT6;EPS1;HLJ1;BRO1;PUP3;UBX5;NPL4;UBX4;SCL1;UBP6;CUZ1;UFD2;UFD1;FES1;VMS1;SEC13;PRE2;PRE1;PRE8;PRE7;CDC34;PRE9;PRE4;PRE6;PRE5;RPT4;RPT5;RPT2;RPT3;RKR1;RSP5;RPN7;RPN5;RPN2;RPN10;RPN1;UBR1;RPN8;RAD23;KAR2;CDC48;SSA2;RPN12;RPN11;YDJ1;CUE1;RQC2;PRE10;GID8;DOA1	Upregulated
mitochondrial translation (GO:0032543)	6.08e-20	3.17e-18	0.0853436	0.83674	-1.48763	65.8223	MRPS17;MRP51;MRPS35;RSM24;RSM25;RSM23;MRPL16;MRPL17;MRPL15;TUF1;IMG1;MRPL35;MRP13;MRPL10;MRPL11;MRPL3;MRPL1;MRPL40;MRPL8;MRPL7;MRPL6;YML6;RSM28;RSM26;MRPL9;NAM9;MRPS28;RSM10;MRP1;VAR1;TYS1;PET123;MEF1;HTS1;MRP7;MRP4;MRPL24;RSM7;MRPS5;MRPL22;MRPS9;MTF2	Upregulated
DNA metabolic process (GO:0006259)	3.19e-16	9.26e-15	0.850224	0.999856	-1.71253	61.1064	POL2;POL1;POL3;TFB3;UNG1;TFB1;CTF18;HSC82;MFT1;PDS5;MRC1;CDC28;CCR4;RFC5;RFC3;RFC1;HEK2;RFC2;TRA1;PRI1;MSH6;MSH2;MCM3;MCM4;TOP2;TOP1;CTF4;POL32;ARP4;SEN1;ORC1;HRR25;RDH54;RPS3;NAM7;SFH1;GBP2;ACT1;SNF2;RFA1;RFA2;CDC9;TSA1;EAF3;BMH2;EAF5;INO80;MGM101;CDC1;NUC1;PBP2;THP2;CGI121;RAP1;FUN30	Upregulated
protein transport (GO:0015031)	4.65e-19	2.13e-17	0.0913714	0.83674	-1.44696	61.0783	RSP5;VPS29;ARF2;PDR17;ECM21;SEC4;APL5;SEC27;ARL1;SAR1;ROD1;CSR1;YPT6;COP1;MDR1;YPT7;DNF1;VPS74;EMP24;YPT1;VPS17;RIC1;SEC14;SED5;SEC17;SFH5;SEC18;PGA3;ERP1;ERP2;YPT31;ERP4;YPT52;GYP5;YPT10;PEP8;GYP6;VPS21;GCS1;SEC31	Upregulated
establishment of protein localization to organelle (GO:0072594)	7.46e-17	2.3e-15	0.0246717	0.699246	-1.63464	60.7012	POM34;NUP188;NUP145;WTM1;KAP123;SXM1;KAP104;NUP82;NUP84;POM152;NUP116;CSE1;NUP133;NUP157;RTS1;SRP1;NIC96;KAP95;PSE1;RNA1;RTG2;ACC1;GSP2;IWR1;NAP1;NPA3;NUP53;NUP57	Upregulated
regulation of translation (GO:0006417)	8.83e-19	3.71e-17	0.0159981	0.593908	-1.42778	59.354	TIF5;NOT3;PAB1;NOT5;PPH21;TPD3;DHH1;NPL3;PUF6;HBS1;NAM7;ASC1;GCN1;DOM34;GCN3;SNF1;GCN2;TMA108;RLI1;ECM32;GCD1;RQC2;GCD2;PAT1;SSD1;TPA1;GCD7;GCD6;GCN20;CAM1;RKR1	Upregulated
purine nucleotide biosynthetic process (GO:0006164)	3.59e-13	6.7e-12	0.00630183	0.45765	-2.05331	58.8388	PRS5;PRS2;PRS1;PRS4;PRS3;ADE8;ADE6;ADE2;ADE12;ADE1;ADE16;ADE13;ADE17	Upregulated
alpha-amino acid biosynthetic process (GO:1901607)	4.29e-19	2.02e-17	0.00233211	0.391535	-1.38543	58.5949	ILV5;HIS2;BAT1;HIS5;BAT2;HIS4;TYR1;ARO8;HIS7;TRP5;TRP4;TRP3;ARO7;TRP2;SER33;SER3;LEU1;SER1;LEU4;ARG8;ILV1;HIS1;LEU9;SHM1	Upregulated
RNA export from nucleus (GO:0006405)	1.18e-19	5.73e-18	0.0193417	0.60886	-1.34416	58.5876	HMT1;NUP188;UTP22;NUP145;SRM1;STO1;NPL3;SXM1;RPS0A;NUP82;MFT1;GLE2;NUP84;RPS3;RPS2;MEX67;NUP159;UTP8;NUP116;CEX1;NUP133;SOL2;NUP157;RPS5;SOL1;MSN5;PSE1;RNA1;CRM1;THP2;SUB2;TEF1;DBP5;SGF73	Upregulated
purine-containing compound biosynthetic process (GO:0072522)	1.18e-17	4.26e-16	0.00150306	0.379202	-1.47984	57.678	PRS5;PRS2;PRS1;PRS4;PRS3;ADE8;ADE6;ADE2;ADE3;ADE12;MTD1;ADE1;ADE16;AAH1;ADE13;SER1;ADE17;MIS1	Upregulated
mRNA export from nucleus (GO:0006406)	3.58e-20	2.08e-18	0.0142982	0.593908	-1.27643	57.1532	RSP5;HMT1;NUP188;NUP145;SRM1;STO1;CSL4;NPL3;SXM1;NUP82;MFT1;GLE2;NEW1;NUP84;HRB1;SPT6;GBP2;MEX67;NUP159;NUP116;NUP133;DIS3;MLP2;RRP43;NIC96;ENP1;PSE1;CRM1;MTR4;THP2;SUB2;PIN4;DBP5;SGF73	Upregulated
ER to Golgi vesicle-mediated transport (GO:0006888)	4.18e-20	2.29e-18	0.0445196	0.770068	-1.28001	57.1172	SEC22;SEC7;YET1;SEC21;YET3;SEC23;SEC26;SEC28;SEC27;GTS1;SAR1;MRS6;GEA2;COP1;RUD3;EMP24;YIP3;EMP47;PHO86;YKT6;YPT1;SEC13;SED5;AGE2;ERP1;ERP2;CDC1;ERP4;ERV41;GRH1;GYL1;GYP5;RET2;SLY1;ERV46;TED1;GCS1;SEC31;BET1	Upregulated
tRNA modification (GO:0006400)	8.67e-16	2.43e-14	0.0366968	0.770068	-1.643	56.9813	GCD10;TRM44;GCD14;TRM82;NFS1;DEG1;TYW1;KRE33;TRM732;TRM5;PUS4;TRM3;TRM2;ALA1;TRM1;PUS1;TYW3;TRM10;PUS7;TRM8;DUS1;TRM7;DUS3;PAP2;TAN1;TCD2;NCL1	Upregulated
nuclear-transcribed mRNA catabolic process (GO:0000956)	1.19e-20	7.81e-19	0.0408581	0.770068	-1.23814	56.804	RRP6;RRP4;NOT3;SKI3;POP1;STO1;NOT5;CSL4;SKI2;NMD4;DHH1;JSN1;PUB1;NRD1;HRB1;HBS1;NAM7;GBP2;CCR4;DOM34;DCS2;MRT4;DCS1;DIS3;ECM32;RRP43;RRP40;SUP35;RAT1;PAT1;TPA1;XRN1;PAP2;CDC39;RPP1;PIN4;RRP45;DBP2;DCP1;RNT1	Upregulated
ATP-dependent chromatin remodeling (GO:0043044)	1.19e-18	4.86e-17	0.00303896	0.443128	-1.37051	56.5637	SNF2;ASF1;ARP9;TUP1;ARP7;NPL6;RSC1;SWI3;INO80;SWI1;STH1;CHD1;RSC8;RSC9;RSC6;RVB2;RSC4;RSC30;RVB1;VPS72;RSC2;RSC3;SFH1;FUN30	Upregulated
transcription elongation from RNA polymerase II promoter (GO:0006368)	6.32e-20	3.18e-18	0.00802121	0.45765	-1.27613	56.4154	HIR1;ARP9;ARP7;NOT5;CTR9;NPL6;SGV1;RPD3;SPT16;CHD1;CDC73;MFT1;RCO1;RSC30;SPT5;SFH1;CCR4;EAF3;RSC1;STH1;RSC58;RSC8;RSC9;THP2;RSC4;SUB2;RSC2;RSC3;CDC39;PAF1;TOP1	Upregulated
pyruvate metabolic process (GO:0006090)	3.34e-17	1.12e-15	0.00445512	0.45765	-1.48371	56.2897	PDA1;MAE1;ALD4;PDB1;PDC1;GLK1;ENO1;ENO2;FBA1;GPM1;EMI2;LAT1;LPD1;HXK1;HXK2;PFK2;PGK1;PFK1;CDC19;PGI1;TDH3;TDH2	Upregulated
maturation of 5.8S rRNA from tricistronic rRNA transcript (SSU-rRNA, 5.8S rRNA, LSU-rRNA) (GO:0000466)	8.26e-19	3.67e-17	0.0589198	0.80972	-1.35042	56.2283	PRP43;RRP6;RRP4;RRP5;CSL4;DIP2;RPF2;RNH70;NOP9;RPS0A;EMG1;TOM1;UTP20;UTP7;NOP58;UTP6;DIS3;KRR1;PNO1;ROK1;RRP43;RRP40;UTP13;ENP1;RAT1;REX2;URB1;MTR4;UTP18;RCL1;MRD1;NOC4;DBP8;DBP6;RRP45;MAK5;DBP3	Upregulated
nucleotide biosynthetic process (GO:0009165)	5.65e-18	2.19e-16	0.00150577	0.379202	-1.40326	55.7301	APA1;PRS5;PRS2;PRS1;PRS4;PRS3;ADE8;ADE6;ADE2;ADE12;ADE1;ADE16;URA5;ADE13;URA4;RNR4;RNR2;ADE17;RNR1	Upregulated
nucleosome organization (GO:0034728)	8.83e-19	3.71e-17	0.0159981	0.593908	-1.32946	55.2667	RLF2;ASF1;ARP9;TUP1;ARP7;ISW2;ARP5;NPL6;SPT16;CHD1;RVB2;POB3;RSC30;RVB1;VPS72;SPT6;SFH1;SNF2;RSC1;INO80;STH1;RSC58;NAP1;RSC8;RSC9;RSC6;RSC4;RSC2;RSC3;IES1;FUN30	Upregulated
tRNA aminoacylation for protein translation (GO:0006418)	6.46e-17	2.03e-15	0.00681122	0.45765	-1.47029	54.8103	ARC1;VAS1;DED81;ILS1;MSW1;TYS1;ALA1;KRS1;MST1;GRS1;HTS1;DPS1;FRS2;GLN4;FRS1;CDC60;GUS1;YHR020W;WRS1;AIM10;MES1;THS1;SES1	Upregulated
protein glycosylation (GO:0006486)	2.15e-15	5.69e-14	0.0578336	0.80972	-1.60719	54.2821	WBP1;CWH41;GDA1;MNN11;ANP1;KRE2;OCH1;MNN1;MNN2;SWP1;ALG9;PMI40;GNT1;OST3;VAN1;ALG2;MNN9;KTR3;ALG12;ALG1;KTR1;MNN5;KTR6;PSA1;PMT4;PMT6;PMT2;SEC53	Upregulated
proteasome assembly (GO:0043248)	1.03e-17	3.79e-16	0.0041828	0.45765	-1.3857	54.2022	RPN6;VMA2;HSP82;RPN2;PNO1;RPN10;RPT6;PBA1;PMA1;PRE2;HSC82;RPN9;NAS6;PRE9;NOB1;PRE4;NAS2;RPT4;RPN11;RPT5;RPT2;RPT3;ECM29	Upregulated
protein import (GO:0017038)	2.67e-16	7.93e-15	0.0270501	0.699246	-1.50626	54.0151	POM34;NUP188;NUP145;WTM1;KAP123;SXM1;KAP104;NUP82;NUP84;POM152;NUP116;CSE1;NUP133;NUP157;SRP1;NIC96;KAP95;PSE1;RNA1;RTG2;ACC1;GSP2;IWR1;NAP1;NPA3;NUP53;NUP57	Upregulated
cellular macromolecule biosynthetic process (GO:0034645)	1.59e-15	4.28e-14	0.120807	0.879386	-1.56097	53.1925	POL1;POL3;SGV1;RPS4B;TUF1;MRPL11;RPS0A;YEF3;MRPL40;RPL1B;MRC1;HBS1;CCR4;EFT1;DOM34;RIA1;RFA1;RFA2;RPS5;SKN7;SUP35;CIC1;RSM7;SNU114;PRI1;RPL8B;TEF4;TEF1;TOP1;UTP30;CAM1;RPL8A	Upregulated
nucleosome disassembly (GO:0006337)	2.59e-14	6.12e-13	0.00601397	0.45765	-1.67468	52.3912	ASF1;ARP9;ARP7;NPL6;RSC1;STH1;RSC58;NAP1;RSC8;RSC9;RSC6;RSC4;RSC30;RSC2;RSC3;SFH1	Upregulated
gene expression (GO:0010467)	7.93e-18	2.99e-16	0.0968072	0.847911	-1.30034	51.2024	HSP60;HSP82;HMT1;STO1;SSQ1;SGV1;YME1;RPS4B;NPL3;SXM1;MRPL11;RPS0A;NUP82;MRPL3;MFT1;MRPL40;NUP84;RPL1B;HBS1;MEX67;DOM34;NUP116;RPS5;SKN7;SUP35;PSE1;CIC1;CRM1;RSM7;RPL8B;THP2;SUB2;UTP30;DBP5;SGF73;RPL8A;RNT1	Upregulated
protein phosphorylation (GO:0006468)	1.16e-15	3.19e-14	0.535777	0.999856	-1.47308	50.6595	PKH2;PKH1;HAL5;KKQ8;TFB3;TFB1;CKB2;SGV1;AKL1;SLT2;DUN1;HRR25;CDC28;CCL1;PHO85;RCK2;RIO1;SNF1;GCN2;KIN2;KIN1;CLA4;TPK1;CKA2;CKA1;YAK1;GIN4;GAL83;COQ8;PKC1;PSK1;CMK2;RTK1;CMK1;PSK2;SNF4;HOG1;FPK1;HRK1;RIM11;YPK1;DBF2;YPK2;MCK1	Upregulated
ribonucleoprotein complex assembly (GO:0022618)	4.28e-17	1.38e-15	0.517868	0.999856	-1.32948	50.1085	RPL5;RRP7;NAB6;RPL3;RRP5;TIF5;HSH155;RPL10;TIF3;NOP2;RPF2;SUI2;DHH1;IPI1;CDC73;EDC3;GCD11;PRP8;RPS0A;PUB1;MFT1;IPI3;MRPL7;MDN1;MRT4;PRP11;TMA64;RPS5;REX4;SPB4;SSF2;PAT1;DRS1;MAK21;RSM7;SSF1;SNU114;BRR2;CUS1;YVH1;THP2;LSG1;RSA4;MRD1;RIX1;RPP0;PRP19;DBP2	Upregulated
chromatin disassembly (GO:0031498)	2.59e-14	6.12e-13	0.00601397	0.45765	-1.5828	49.5168	ASF1;ARP9;ARP7;NPL6;RSC1;STH1;RSC58;NAP1;RSC8;RSC9;RSC6;RSC4;RSC30;RSC2;RSC3;SFH1	Upregulated
nuclear import (GO:0051170)	2.14e-17	7.34e-16	0.0177928	0.593908	-1.2859	49.3587	POM34;NUP188;NUP145;WTM1;KAP123;SXM1;KAP104;NUP82;NUP84;POM152;NUP116;CSE1;NUP133;NUP157;SRP1;NIC96;KAP95;PSE1;RNA1;RTG2;ACC1;GSP2;IWR1;NAP1;NPA3;NUP53;FMP52;NUP57	Upregulated
glycolytic process (GO:0006096)	2.55e-13	4.87e-12	0.00851946	0.45765	-1.69419	49.1294	GLK1;ENO1;ENO2;FBA1;GPM1;EMI2;HXK1;HXK2;PFK2;PGK1;PFK1;CDC19;PGI1;TDH3;TDH2	Upregulated
ergosterol biosynthetic process (GO:0006696)	1.92e-12	3.06e-11	0.0184736	0.593908	-1.81538	48.9752	ERG11;ERG12;ERG20;ERG10;ERG26;ERG27;ERG13;HMG1;NCP1;ERG1;ERG3;ERG4;ERG5;ERG6;ERG8;ERG9	Upregulated
cellular alcohol biosynthetic process (GO:0044108)	1.92e-12	3.06e-11	0.0184736	0.593908	-1.81041	48.841	ERG11;ERG12;ERG20;ERG10;ERG26;ERG27;ERG13;HMG1;NCP1;ERG1;ERG3;ERG4;ERG5;ERG6;ERG8;ERG9	Upregulated
purine nucleotide metabolic process (GO:0006163)	3.19e-14	7.18e-13	0.00437786	0.45765	-1.56586	48.6633	PRS5;PRS2;PRS1;PRS4;AMD1;PRS3;ADE8;ADE6;ADE2;ADE12;ADE1;ADE16;ADE13;ADE17	Upregulated
protein localization to nucleus (GO:0034504)	3.8e-17	1.25e-15	0.0262753	0.699246	-1.28565	48.6088	POM34;NUP188;NUP145;WTM1;KAP123;SXM1;KAP104;NUP82;SDS22;NUP84;CDC28;POM152;NUP116;CSE1;NUP133;NUP157;SRP1;NIC96;KAP95;PSE1;RNA1;RTG2;ACC1;GSP2;IWR1;NAP1;NPA3;NUP53;NUP57	Upregulated
cellular amino acid biosynthetic process (GO:0008652)	4e-12	6.05e-11	0.00908636	0.45765	-1.80059	47.2537	ILV5;ILV6;BAT1;ILV3;BAT2;ALD2;ARO7;ARO4;ARO2;ARO3;ILV2;MET5	Upregulated
ribosomal subunit export from nucleus (GO:0000054)	2.21e-14	5.39e-13	0.0417927	0.770068	-1.49807	47.1019	NUP159;NUP116;RLI1;JJJ1;SRM1;NIC96;NOG2;NMD3;RNA1;CRM1;NOP9;GSP2;NUP82;RIX7;LSG1;ARX1;NUG1;RIX1;SSB2;ZUO1;RPS3;MEX67;BCP1;ARB1	Upregulated
replicative cell aging (GO:0001302)	5.59e-13	1.02e-11	0.0474369	0.784525	-1.65541	46.7027	CTF4;SNF1;PHB1;MDH1;MSN4;RAS2;TSA1;PNC1;RPD3;PGA3;GUT2;PHB2;MSN2;AFG3;SNF4;SIR2;CDC25;HXK2;NMT1;NPT1;ACS2	Upregulated
protein import into nucleus (GO:0006606)	4.28e-16	1.22e-14	0.0386472	0.770068	-1.31311	46.4671	POM34;NUP188;NUP145;WTM1;KAP123;SXM1;KAP104;NUP82;NUP84;NUP159;POM152;NUP116;CSE1;NUP133;NUP157;SRP1;NIC96;KAP95;PSE1;RNA1;RTG2;ACC1;GSP2;IWR1;NAP1;NPA3;NUP53;NUP57	Upregulated
cellular response to oxidative stress (GO:0034599)	7.12e-14	1.58e-12	0.296347	0.956964	-1.53384	46.4349	YAP1;ASK10;UGA2;TMA19;AHP1;YHB1;GRE3;YLR225C;TPS1;CCP1;RCK2;YPR1;ZTA1;ACT1;POS5;GLR1;GRX4;GRX3;SKN7;GRX6;MSN4;TSA1;SVF1;GRX7;OXR1;CMK2;MSN2;CMK1;HOG1;ALO1;GND1;TRR1;PRX1	Upregulated
cellular response to DNA damage stimulus (GO:0006974)	4.66e-15	1.19e-13	0.614937	0.999856	-1.39477	46.0258	CTF4;TFB3;UNG1;TFB1;CKB2;NPL6;ARP4;IRC21;PDS5;SEN1;DUN1;HRR25;NUP84;RDH54;MRC1;GLC7;RPS3;SFH1;PHO85;MKT1;RFC5;ACT1;GCN2;RFA1;RFC3;RFA2;RFC1;RFC2;CKA2;CKA1;TSA1;EAF3;TRA1;BMH2;BMH1;EAF5;INO80;MGM101;CDC1;PTC2;PIN4;UBA1;BCP1;YIM1	Upregulated
phosphorylation (GO:0016310)	2.68e-16	7.93e-15	0.453573	0.999856	-1.25582	45.0302	PKH2;HAL5;KKQ8;CKB2;SGV1;CYT1;RBK1;AKL1;SLT2;DUN1;HRR25;CDC28;XKS1;YDR248C;PHO85;ERG8;RCK2;RIO1;SNF1;GCN2;KIN2;KIN1;CLA4;TPK1;CKA2;CKA1;YAK1;GIN4;GAL83;PKC1;PSK1;CMK2;RTK1;CMK1;PSK2;SNF4;HOG1;FPK1;HRK1;RIM11;YPK1;DBF2;YPK2;MCK1	Upregulated
glucose metabolic process (GO:0006006)	1.12e-13	2.37e-12	0.0184035	0.593908	-1.5037	44.8469	MDH2;NDE1;PDC1;GLK1;ENO1;ENO2;FBA1;GPM1;PYC1;HXK1;HXK2;DOG2;PGK1;PGM2;PGI1;TDH3;PYC2;TDH2;PGM1	Upregulated
glutamine family amino acid biosynthetic process (GO:0009084)	2.64e-14	6.14e-13	0.0096576	0.47073	-1.43275	44.7955	PRO2;CPA2;PRO1;CPA1;ARG3;GLT1;PRO3;ARG1;IDH1;PUT2;GDH1;IDH2;GLN1;URA2;MEU1;ARG8;CIT1;IDP1	Upregulated
sterol biosynthetic process (GO:0016126)	2.45e-15	6.38e-14	0.0084497	0.45765	-1.33033	44.7572	PDR17;PDR16;ERG11;ERG12;ERG20;ERG10;NSG1;ERG26;ERG27;ERG13;HMG1;MVD1;NCP1;ERG1;ERG3;ERG4;ERG5;ERG6;ERG8;ERG9	Upregulated
methionine metabolic process (GO:0006555)	6.9e-11	8.15e-10	0.0179022	0.593908	-1.86498	43.634	MET12;HOM6;MET22;SAH1;MET13;SAM1;ADI1;SAM2;HOM3;HOM2;MET6;MET17	Upregulated
secondary alcohol biosynthetic process (GO:1902653)	2.27e-13	4.58e-12	0.0133711	0.593908	-1.4779	43.0242	ERG11;ERG12;ERG20;ERG10;ERG26;ERG27;ERG13;HMG1;NCP1;BDH1;ERG1;ERG3;ERG4;ERG5;ERG6;ERG8;ERG9	Upregulated
serine family amino acid biosynthetic process (GO:0009070)	4e-12	6.05e-11	0.00908636	0.45765	-1.6288	42.7455	HOM6;LPD1;SER33;SER2;SER3;SER1;CYS3;GLY1;HOM3;HOM2;MET17;SHM1	Upregulated
endosomal transport (GO:0016197)	1.21e-14	3e-13	0.1298	0.879386	-1.32568	42.479	VPS29;FAB1;MUK1;DOP1;GGA2;YPT6;GGA1;VPS4;YPT7;VPS5;VPS53;VPS30;VPS13;RTT10;YPT1;VPS17;RIC1;TDA3;VTA1;VPS9;CHC1;YPT52;HSE1;OSH7;PEP8;VPS21;SLM1;VPS45;PEP5;VPS27	Upregulated
ribosomal large subunit assembly (GO:0000027)	1.01e-12	1.8e-11	0.0555499	0.80972	-1.53021	42.2622	MRT4;RPL5;RPL3;RRP5;RPL10;REX4;SPB4;SSF2;DRS1;RPF2;IPI1;MAK21;SSF1;YVH1;LSG1;RSA4;IPI3;MRPL7;RIX1;RPP0;MDN1	Upregulated
Ras protein signal transduction (GO:0007265)	3.02e-13	5.7e-12	0.0402123	0.770068	-1.44591	41.6838	CLA4;SEC4;SLG1;TPK1;BOI2;BMH2;BMH1;CDC42;YPT31;YPT6;YPT52;YPT7;CDC25;YPT10;VPS21;RHO5;RHO3;SRV2;YPT1;RHO1;RHO2	Upregulated
proteolysis (GO:0006508)	4.21e-13	7.76e-12	0.0707937	0.83674	-1.45191	41.3729	APE4;APE2;TMA108;CYM1;YME1;PRD1;YTA12;MCX1;AFG3;KEX1;MAS2;MAS1;ICP55;NAS6;RIM11;COR1;PRC1;QCR2;ECM14;PEP4;STE23;AAP1;COX20	Upregulated
nicotinamide nucleotide metabolic process (GO:0046496)	1.59e-11	2.12e-10	0.0254618	0.699246	-1.6592	41.257	GLK1;ENO1;ENO2;FBA1;GPM1;EMI2;HXK1;HXK2;PFK2;PGK1;PFK1;CDC19;PGI1;TDH3;TDH2	Upregulated
retrograde vesicle-mediated transport, Golgi to ER (GO:0006890)	2.44e-13	4.84e-12	0.0227969	0.688923	-1.41976	41.2343	SEC22;SEC21;SEC27;GEA2;YPT6;COP1;ERV41;RET2;SLY1;VPS74;ERV46;GET1;GCS1;TIP20;GET3;GET2;NEO1;YPT1;BET1	Upregulated
ATP generation from ADP (GO:0006757)	2.55e-13	4.87e-12	0.00851946	0.45765	-1.41407	41.0063	GLK1;ENO1;ENO2;FBA1;GPM1;EMI2;HXK1;HXK2;PFK2;PGK1;PFK1;CDC19;PGI1;TDH3;TDH2	Upregulated
proteasomal ubiquitin-independent protein catabolic process (GO:0010499)	1.78e-12	2.95e-11	0.00901245	0.45765	-1.51233	40.9183	PUP2;PUP1;PRE2;PRE1;PUP3;PRE10;PRE8;PRE7;PRE9;SCL1;PRE4;PRE6;PRE5	Upregulated
protein-DNA complex disassembly (GO:0032986)	8.81e-14	1.9e-12	0.00816989	0.45765	-1.36077	40.9058	ASF1;ARP9;ARP7;NPL6;RSC1;STH1;RSC58;NAP1;RSC8;RSC9;RSC6;RSC4;RSC30;RSC2;RSC3;SFH1	Upregulated
maturation of LSU-rRNA (GO:0000470)	7.11e-13	1.28e-11	0.0808175	0.83674	-1.45363	40.6618	NOP12;PRP43;NOP2;SPB4;CIC1;URB1;NOP7;RPF2;IPI1;SSF1;RPL7A;RPL8B;NUG1;HAS1;RPL1B;YTM1;DBP9;DBP7;DBP6;UTP30;ERB1;MAK5;RPL8A	Upregulated
DNA repair (GO:0006281)	6.98e-15	1.76e-13	0.749647	0.999856	-1.21765	39.69	CTF4;POL2;POL32;POL1;POL3;TFB3;UNG1;NUP145;POL30;RPT6;TFB1;ARP4;APN1;SMC1;RTT107;PDS5;HRR25;NUP84;RDH54;MRC1;RPS3;SFH1;RFC5;ACT1;SNF2;RFA1;RFC3;RFA2;NUP133;RFC1;RFC2;CDC9;EAF3;RSC1;TRA1;EAF5;INO80;TPA1;STH1;MGM101;CDC1;MSH6;MSH2;PAP2;RSC2;RPT4;RAD18	Upregulated
phytosteroid biosynthetic process (GO:0016129)	1.92e-12	3.06e-11	0.0184736	0.593908	-1.46784	39.5992	ERG11;ERG12;ERG20;ERG10;ERG26;ERG27;ERG13;HMG1;NCP1;ERG1;ERG3;ERG4;ERG5;ERG6;ERG8;ERG9	Upregulated
organonitrogen compound biosynthetic process (GO:1901566)	6.78e-12	9.85e-11	0.113676	0.879386	-1.51996	39.0893	BNA3;CPA2;CPA1;LCB2;ARG1;LCB1;SUR2;TYW3;RQC2;KAP95;URA2;ELO3;LCB3;IFA38;CKI1;SAH1;BIO4;FLC1;FLC2;PSD1;CHO2;TYW1	Upregulated
maturation of SSU-rRNA (GO:0030490)	1.84e-13	3.75e-12	0.264183	0.926668	-1.31922	38.6876	FAL1;PRP43;RRP5;UTP22;RRP3;DIP2;NOP7;NOB1;BMS1;HAS1;KRE33;RIO1;UTP15;UTP8;UTP7;UTP6;UTP5;UTP4;ROK1;UTP13;DIM1;RPS1A;RPS1B;UTP9;MRPS9;NAN1;TSR1;SQS1;BFR2;UTP30;ECM16	Upregulated
regulation of transcription elongation from RNA polymerase II promoter (GO:0034243)	2.52e-12	3.92e-11	0.0888066	0.83674	-1.4448	38.5887	CET1;GCN5;ASF1;HMT1;MOT2;NOT3;NOT5;RPT6;SGV1;RAT1;SPT16;NPL3;CDC73;NAP1;RSC6;XRN1;CDC39;RPT4;SPT5;PAF1;SPT6;CCR4	Upregulated
ribosome assembly (GO:0042255)	1.61e-12	2.7e-11	0.21418	0.890701	-1.4122	38.3481	RPL5;RRP7;RPL3;TIF5;RPL10;RPF2;IPI1;RPS0A;IPI3;MRPL7;MDN1;MRT4;RIA1;RPS5;REX4;SPB4;SSF2;DRS1;MAK21;RSM7;SSF1;YVH1;LSG1;RSA4;SDO1;RIX1;RPP0	Upregulated
poly(A)+ mRNA export from nucleus (GO:0016973)	8.15e-14	1.78e-12	0.028229	0.699246	-1.27105	38.307	NUP159;RSP5;NUP116;NUP133;DIS3;MLP2;NUP145;RRP43;SRM1;CSL4;NIC96;ENP1;MTR4;GLE2;NEW1;HRB1;SPT6;PIN4;DBP5;GBP2;MEX67	Upregulated
cellular response to heat (GO:0034605)	2.7e-14	6.19e-13	0.128364	0.879386	-1.21532	37.9693	NUP188;SSQ1;SSC1;SWI4;CPR7;HSC82;SSZ1;KAR2;NUP84;SWI6;HSF1;SSA2;LHS1;NMA111;HSP78;TPS2;SIN3;TPS1;HSP104;NUP133;SKN7;YAK1;MSN4;AHA1;MSN2;HOG1;RIM11;SSB2;MCK1	Upregulated
cellular protein complex disassembly (GO:0043624)	2.46e-12	3.88e-11	0.012066	0.569743	-1.41871	37.9213	RLI1;RPL10;SEC17;SEC18;SUP35;TPA1;ETT1;NPL3;YEF3;CDC48;SSB2;SUP45;DBP5;YPT1	Upregulated
ergosterol metabolic process (GO:0008204)	1.34e-12	2.31e-11	0.021691	0.66888	-1.38298	37.805	ERG11;ERG12;ERG20;ERG10;ERG26;ERG27;ERG13;HMG1;NCP1;ERG1;ERG3;GRE2;ERG4;ERG5;ERG6;ERG8;ERG9	Upregulated
post-Golgi vesicle-mediated transport (GO:0006892)	1.42e-13	2.93e-12	0.153153	0.879386	-1.27446	37.7051	RSN1;ARF2;SEC3;SEC4;APL5;APL6;APL4;MUK1;APL2;ELO3;DOP1;SNC1;CSR1;GGA2;GGA1;VPS53;CDC28;SEC14;VPS9;APM3;CHC1;YPT52;BCH1;CHS5;VPS21;KES1;VPS45;PEP5	Upregulated
sulfur amino acid biosynthetic process (GO:0000097)	1.94e-09	1.88e-08	0.0267167	0.699246	-1.86409	37.3987	MET12;HOM6;MET22;MET13;CYS3;HOM3;HOM2;MET5;MET6;MET17	Upregulated
dicarboxylic acid biosynthetic process (GO:0043650)	2.55e-13	4.87e-12	0.00851946	0.45765	-1.28737	37.3321	AAT2;GLT1;IDH1;PUT2;GDH1;IDH2;ARO4;ARO2;ARO3;ARO1;ADE3;MEU1;CIT1;IDP1;MIS1	Upregulated
cellular lipid biosynthetic process (GO:0097384)	1.92e-12	3.06e-11	0.0184736	0.593908	-1.37015	36.9638	ERG11;ERG12;ERG20;ERG10;ERG26;ERG27;ERG13;HMG1;NCP1;ERG1;ERG3;ERG4;ERG5;ERG6;ERG8;ERG9	Upregulated
aspartate family amino acid biosynthetic process (GO:0009067)	2.34e-11	3.05e-10	0.0170837	0.593908	-1.48734	36.4072	AAT2;MET12;MET22;MET13;ASN2;LYS1;ASN1;HOM3;HOM2;HOM6;THR4;MET6;LYS12	Upregulated
transcription, DNA-templated (GO:0006351)	1.03e-12	1.81e-11	0.355551	0.956964	-1.31639	36.3322	BRE1;RPA135;TFB3;ISW1;TFB1;CTR9;RTR1;GRS1;RPB2;RPB3;SGV1;SPT15;SEN1;RPA190;SET2;SUP45;RPB5;CCL1;TAF12;TFC3;SKN7;TFC1;RPC40;RPA43;INO80;PAF1;RPO21;TAF5;TAF4;TAF2;TAF1	Upregulated
endonucleolytic cleavage of tricistronic rRNA transcript (SSU-rRNA, 5.8S rRNA, LSU-rRNA) (GO:0000479)	1.43e-12	2.42e-11	0.118866	0.879386	-1.32288	36.0838	UTP7;NOP58;UTP6;RRP5;KRR1;PNO1;ROK1;UTP13;DIP2;ENP1;RAT1;UTP18;NOP9;RPS0A;RCL1;EMG1;BMS1;MRD1;NOC4;TOM1;DBP8;TSR1;UTP20;DBP3	Upregulated
endoplasmic reticulum organization (GO:0007029)	7.29e-12	1.02e-10	0.0448462	0.770068	-1.39593	35.7978	LNP1;RTN1;SEC3;TCB3;SCS2;DOP1;SEY1;SWA2;MYO4;TCB1;GET1;EMP47;GET3;GET2;HER1;SEC31;YOP1;GET4	Upregulated
endonucleolytic cleavage to generate mature 5'-end of SSU-rRNA from (SSU-rRNA, 5.8S rRNA, LSU-rRNA) (GO:0000472)	3.7e-12	5.71e-11	0.0372138	0.770068	-1.34736	35.4655	UTP7;NOP58;UTP6;RRP5;PNO1;ROK1;UTP13;DIP2;UTP18;NOP9;RCL1;EMG1;BMS1;MRD1;NOC4;TOM1;DBP8;UTP20	Upregulated
organelle inheritance (GO:0048308)	1.17e-13	2.46e-12	0.0992906	0.852432	-1.17456	34.973	PHB1;RTN1;SEC3;MDM20;ARP3;MYO2;OLE1;ARP2;PHB2;SWA2;YPT7;MYO4;YOP1;ACT1;CLA4;BUL1;VAC8;VPS9;SCS2;SEY1;ARC35;DNM1;NUM1;RET2;VPS21;VPS45	Upregulated
glucose 6-phosphate metabolic process (GO:0051156)	6.9e-11	8.15e-10	0.0179022	0.593908	-1.48897	34.8368	SOL4;ZWF1;SOL2;GND1;SOL3;TAL1;RKI1;SOL1;PGM2;PGI1;TKL1;PGM1	Upregulated
endonucleolytic cleavage in 5'-ETS of tricistronic rRNA transcript (SSU-rRNA, 5.8S rRNA, LSU-rRNA) (GO:0000480)	2.61e-11	3.29e-10	0.0493249	0.784525	-1.40777	34.3044	UTP7;NOP58;UTP6;RRP5;ROK1;UTP13;DIP2;UTP18;NOP9;RCL1;EMG1;BMS1;MRD1;NOC4;TOM1;DBP8;UTP20	Upregulated
vacuolar transport (GO:0007034)	1.19e-12	2.06e-11	0.409949	0.982044	-1.24675	34.235	APL5;APL6;ARL1;APL4;APL2;BRO1;GGA2;VPS1;GGA1;SNX4;VPS4;VPS53;VPS30;VPS13;VMA6;VTC1;SEC14;VTC2;VTA1;VTC3;VTC4;VPS9;APM3;LOA1;YPT52;PEP1;HSE1;OSH7;VPS21;VPS45;PEP5;VPS27	Upregulated
misfolded or incompletely synthesized protein catabolic process (GO:0006515)	4.72e-11	5.84e-10	0.0448312	0.770068	-1.43061	34.0158	MCA1;YME1;UBR1;NPL4;KRE5;CDC48;PIM1;UFD1;MDJ1;PMT6;FES1;MGR1;VMS1;PMT2;MGR3;PMT1	Upregulated
nuclear pore organization (GO:0006999)	4.44e-10	4.9e-09	0.0380437	0.770068	-1.57196	33.8516	POM152;NUP116;POM34;RTN1;NUP188;NUP157;SNL1;NIC96;KAP95;NUP53;NUP57;SEH1;YOP1	Upregulated
maturation of LSU-rRNA from tricistronic rRNA transcript (SSU-rRNA, 5.8S rRNA, LSU-rRNA) (GO:0000463)	5.16e-11	6.24e-10	0.121691	0.879386	-1.42546	33.766	NOP12;PRP43;RRP5;NOP2;RAT1;URB1;NOP7;RPF2;IPI1;SSF1;RPL7A;NUG1;HAS1;DBP9;TOM1;DBP7;DBP6;ERB1;MAK5;DBP3	Upregulated
regulation of DNA-dependent DNA replication (GO:0090329)	1.59e-11	2.12e-10	0.0254618	0.699246	-1.35155	33.6072	CTI6;BRE1;EAF3;RPD3;CHD1;IPI1;HOG1;IPI3;RCO1;RIX1;SET2;MRC1;RSC3;SFH1;SIN3	Upregulated
positive regulation of transcription elongation from RNA polymerase II promoter (GO:0032968)	8.9e-12	1.23e-10	0.0976417	0.847911	-1.30943	33.3187	CET1;GCN5;ASF1;HMT1;MOT2;NOT3;NOT5;RPT6;SGV1;SPT16;NPL3;CDC73;NAP1;RSC6;XRN1;CDC39;RPT4;SPT5;PAF1;SPT6;CCR4	Upregulated
tRNA export from nucleus (GO:0006409)	1.98e-09	1.88e-08	0.0341956	0.770068	-1.65932	33.2514	UTP8;NUP116;CEX1;NUP133;SOL2;UTP22;NUP145;SOL1;MSN5;RNA1;TEF1	Upregulated
carbohydrate catabolic process (GO:0016052)	2.28e-11	3e-10	0.0366036	0.770068	-1.35527	33.2095	GLK1;ENO1;ENO2;FBA1;GPM1;EMI2;AMS1;HXK1;HXK2;PFK2;PGK1;PFK1;CDC19;PGI1;TDH3;TDH2	Upregulated
snoRNA 3'-end processing (GO:0031126)	6.44e-12	9.54e-11	0.0334525	0.770068	-1.26754	32.6631	RRP6;RRP4;DIS3;RRP43;NOP1;RRP40;CSL4;CTR9;PTI1;MTR4;CBF5;SEN1;NRD1;PAP2;PAP1;PAF1;RRP45	Upregulated
positive regulation of DNA-templated transcription, elongation (GO:0032786)	6.78e-12	9.85e-11	0.113676	0.879386	-1.25656	32.3155	CET1;GCN5;ASF1;HMT1;MOT2;NOT3;NOT5;RPT6;CTR9;SGV1;SPT16;NPL3;CDC73;NAP1;RSC6;XRN1;CDC39;RPT4;SPT5;PAF1;SPT6;CCR4	Upregulated
rRNA 5'-end processing (GO:0000967)	1.39e-11	1.89e-10	0.0535369	0.80972	-1.29146	32.2843	UTP7;NOP58;UTP6;RRP5;PNO1;ROK1;UTP13;DIP2;UTP18;NOP9;RCL1;EMG1;BMS1;MRD1;NOC4;TOM1;DBP8;UTP20	Upregulated
protein N-linked glycosylation (GO:0006487)	6.7e-11	8.03e-10	0.103821	0.879386	-1.37081	32.1133	SWP1;ALG9;WBP1;GNT1;OST3;VAN1;MNN9;CWH41;KTR3;ALG12;ALG1;KTR1;MNN11;KTR6;ANP1;KRE5;KRE2;OCH1;SEC53	Upregulated
cellular protein complex assembly (GO:0043623)	6.85e-12	9.86e-11	0.472623	0.999856	-1.24883	32.1037	RPN6;HSP60;HSP82;RTN1;RPN2;TIF3;RPN10;ARP4;SLA2;HSC82;RPN9;NOB1;SGT1;PIM1;ECM29;YPT1;YOP1;IMP2;PNO1;NUP157;PBA1;NIC96;GIN4;KAP95;CDC3;CDC10;CDC11;CDC12;PRE4;SHS1;RCF1	Upregulated
mitochondrion organization (GO:0007005)	4.29e-12	6.42e-11	0.633825	0.999856	-1.21604	31.8298	RSP5;HSP60;HSP82;PHB1;TOM71;YME2;YME1;SAR1;GGC1;TOM70;VPS1;MDV1;PIM1;RPN11;MDJ1;VPS13;HSP78;YDJ1;ILV5;IMP2;ATP12;ATP11;KGD2;YTA12;REX2;DNM1;MGM101;AFG3;NUM1;ACO1;MGM1;RCF1;POR1;AIM17;YHM2	Upregulated
cytosolic transport (GO:0016482)	2.38e-11	3.07e-10	0.124783	0.879386	-1.29842	31.7631	VPS29;RIC1;TDA3;VPS9;FAB1;MUK1;CHC1;DOP1;GGA2;YPT6;GGA1;YPT52;YPT7;VPS5;VPS53;VPS30;PEP8;VPS21;VPS45;VPS17;PEP5	Upregulated
DNA strand elongation involved in DNA replication (GO:0006271)	1.68e-10	1.93e-09	0.0492391	0.784525	-1.4089	31.7061	POL2;POL32;RFC5;POL1;RFC3;RFC1;RFC2;POL30;CDC9;PRI1;MCM3;MCM4;TOP2;MCM6;TOP1	Upregulated
late endosome to vacuole transport (GO:0045324)	8.2e-11	9.6e-10	0.0864713	0.83674	-1.35867	31.5547	PKH2;RSP5;PKH1;SEC28;VTA1;SEC27;VPS9;MUK1;ELO3;YPT52;VPS4;HSE1;OSH7;VPS30;VPS21;VPS13;PEP5;VPS27	Upregulated
nucleus organization (GO:0006997)	7.19e-12	1.02e-10	0.0574769	0.80972	-1.22441	31.4172	NUP159;POM152;TOF2;NUP116;SEC13;POM34;NUP133;NUP188;NUP145;SNL1;NIC96;ACC1;GSP2;GLE2;NUP53;NUP84;TOM1;NUP57;SEH1	Upregulated
regulation of gene expression (GO:0010468)	2.6e-11	3.29e-10	0.269402	0.937942	-1.26977	30.9484	RSP5;ASF1;HMT1;CTR9;NPL6;ARP4;SLT2;RSC30;MAP1;NUP84;SET2;CDC28;SPT5;SPT6;SNT1;CLA4;NUP133;MLP2;STH1;HOG1;RSC8;WHI3;NUP53;RSC3;CHS5	Upregulated
dicarboxylic acid metabolic process (GO:0043648)	1.98e-09	1.88e-08	0.0341956	0.770068	-1.54333	30.927	FUM1;LPD1;MAE1;MDH2;FSH2;LSC1;FSH1;FSH3;KGD2;KGD1;NIT3	Upregulated
tRNA methylation (GO:0030488)	2.15e-09	2.03e-08	0.059483	0.80972	-1.53059	30.5464	GCD10;TRM5;TRM3;TRM1;TYW3;TRM10;TRM44;GCD14;TRM8;TRM7;TRM82;TRM732;NCL1	Upregulated
rRNA catabolic process (GO:0016075)	7.29e-12	1.02e-10	0.0448462	0.770068	-1.1765	30.1707	DOM34;RRP6;RRP4;DIS3;RRP43;RPT6;RRP40;CSL4;RAT1;MTR4;NPL4;XRN1;CDC48;PAP2;HBS1;UFD1;RPT2;RRP45	Upregulated
endonucleolytic cleavage in ITS1 to separate SSU-rRNA from 5.8S rRNA and LSU-rRNA from tricistronic rRNA transcript (SSU-rRNA, 5.8S rRNA, LSU-rRNA) (GO:0000447)	1.89e-11	2.5e-10	0.094245	0.847911	-1.21032	29.8872	UTP7;NOP58;UTP6;RRP5;KRR1;PNO1;ROK1;UTP13;DIP2;ENP1;UTP18;NOP9;RPS0A;RCL1;EMG1;MRD1;NOC4;TOM1;DBP8;UTP20	Upregulated
peptide metabolic process (GO:0006518)	5e-11	6.09e-10	0.058984	0.80972	-1.25518	29.7726	APE2;TMA108;GLR1;GLO1;RQC2;PRD1;SPC2;YTA12;GTT1;AFG3;OXP1;TEF4;RPT2;YCF1;CAM1;STE23;AAP1	Upregulated
gluconeogenesis (GO:0006094)	1.98e-09	1.88e-08	0.0341956	0.770068	-1.48153	29.6886	PYC1;MDH2;PGK1;PGI1;ENO1;ENO2;FBA1;GPM1;TDH3;PYC2;TDH2	Upregulated
nuclear-transcribed mRNA catabolic process, nonsense-mediated decay (GO:0000184)	1.68e-10	1.93e-09	0.0492391	0.784525	-1.31113	29.5059	RRP4;SKI3;DIS3;ECM32;RRP43;STO1;RRP40;CSL4;SKI2;NMD4;PUB1;XRN1;NAM7;RRP45;DBP2	Upregulated
'de novo' IMP biosynthetic process (GO:0006189)	1.16e-08	1.03e-07	0.027919	0.699246	-1.60509	29.323	ADE1;ADE16;ADE13;ADE8;ADE6;ADE17;ADE4;ADE2	Upregulated
RNA methylation (GO:0001510)	2.58e-11	3.29e-10	0.0633422	0.825087	-1.19611	29.1626	GCD10;TRM5;TRM3;TRM1;NOP1;TYW3;NOP2;TRM10;DIM1;MUM2;TRM44;GCD14;TRM8;TRM7;TRM82;RCM1;TRM732;NCL1	Upregulated
nuclear-transcribed mRNA catabolic process, deadenylation-dependent decay (GO:0000288)	6e-10	6.47e-09	0.0906357	0.83674	-1.37208	29.1358	DCS2;DCS1;RRP4;NOT3;RRP43;NOT5;RRP40;SUP35;PAT1;TPA1;DHH1;JSN1;CDC39;RRP45;CCR4;DCP1	Upregulated
organic cyclic compound biosynthetic process (GO:1901362)	1.68e-10	1.93e-09	0.0492391	0.784525	-1.28242	28.8597	PRO2;BNA3;HIS2;LIP5;PRO1;HIS5;HIS4;PRO3;HIS7;ARO7;ARO4;ARO2;ARO3;BIO4;HIS1	Upregulated
intra-Golgi vesicle-mediated transport (GO:0006891)	5e-11	6.09e-10	0.058984	0.80972	-1.20744	28.6403	SEC7;SEC21;COG8;COG6;SEC26;SED5;COG4;SEC28;SEC27;COG1;SEC18;GTS1;AGE2;GEA2;YPT6;COP1;YKT6	Upregulated
branched-chain amino acid biosynthetic process (GO:0009082)	1.94e-09	1.88e-08	0.0267167	0.699246	-1.41247	28.3379	ILV5;ILV6;BAT1;ILV3;BAT2;LEU1;LEU4;ILV1;ILV2;LEU9	Upregulated
sterol metabolic process (GO:0016125)	1.2e-09	1.24e-08	0.0852788	0.83674	-1.37704	28.2861	PDR17;PDR16;ERG11;ERG12;NSG1;HMG1;MVD1;VPS4;OSH7;ERG1;OSH6;ERG3;GRE2;ERG4;ERG5	Upregulated
translational termination (GO:0006415)	1.76e-08	1.52e-07	0.0483239	0.784525	-1.57918	28.2006	YEF3;RLI1;RPL10;SSB2;SUP45;SUP35;TPA1;DBP5;ETT1;NPL3	Upregulated
protein targeting to mitochondrion (GO:0006626)	1.29e-09	1.32e-08	0.359557	0.956964	-1.35805	27.7961	HSP60;HSP82;IMP2;PAM17;DJP1;SSC1;TOM71;YME1;TOM40;YTA12;MCX1;AFG3;TOM70;MAS2;MAS1;TIM50;TIM21;TIM54;QCR2;TIM23;YDJ1;MIC60	Upregulated
hexose biosynthetic process (GO:0019319)	1.98e-09	1.88e-08	0.0341956	0.770068	-1.37856	27.6253	PYC1;MDH2;PGK1;PGI1;ENO1;ENO2;FBA1;GPM1;TDH3;PYC2;TDH2	Upregulated
nucleosome positioning (GO:0016584)	1.92e-08	1.63e-07	0.0384853	0.770068	-1.54557	27.4653	RSC6;ARP9;TUP1;ISW2;RSC3;INO80;STH1;CHD1;FUN30	Upregulated
establishment of protein localization to mitochondrion (GO:0072655)	6.37e-10	6.78e-09	0.147344	0.879386	-1.29507	27.4216	HSP60;HSP82;PAM17;MDM38;SSC1;TOM71;YME1;TOM40;YTA12;MCX1;AFG3;TOM70;TIM50;YLH47;TIM21;TIM23;YDJ1;MIC60	Upregulated
translational elongation (GO:0006414)	4.72e-11	5.84e-10	0.0448312	0.770068	-1.13924	27.0879	RIA1;MEF1;RQC2;TUF1;SNU114;YEF3;SSZ1;SSB2;ZUO1;TEF4;HBS1;TEF1;CAM1;ASC1;EFT1;RKR1	Upregulated
septin ring organization (GO:0031106)	1.79e-09	1.77e-08	0.121833	0.879386	-1.34269	27.0402	RGA2;CLA4;RGA1;RTS1;GIN4;PKC1;CDC3;CDC42;CDC10;CDC11;CDC12;CDC24;SHS1;BEM3;BUD4;RHO1	Upregulated
ERAD pathway (GO:0036503)	1.21e-11	1.66e-10	0.16029	0.879386	-1.05269	26.4617	CUE1;SEC13;RPT6;EPS1;HLJ1;UBR1;NPL4;UBX4;KRE5;RAD23;KAR2;CDC48;RPT4;UFD2;RPT5;UFD1;PMT6;RPT2;RPT3;YDJ1;VMS1;PMT2;PMT1	Upregulated
IMP biosynthetic process (GO:0006188)	5.15e-09	4.72e-08	0.0275877	0.699246	-1.37303	26.203	ADE1;ADE16;HPT1;ADE13;ADE8;ADE6;ADE17;ADE4;ADE2	Upregulated
organelle fission (GO:0048285)	5.22e-09	4.75e-08	0.0447384	0.770068	-1.36497	26.032	VPS1;TUB4;DBF2;TUB3;MDV1;TUB1;RPN11;MGM1;SAR1;DNM1;NUM1	Upregulated
DNA-dependent DNA replication (GO:0006261)	6.58e-10	6.95e-09	0.420495	0.982044	-1.22969	25.998	CTF4;POL2;RFC5;POL1;SNF2;RFA1;RFC3;POL3;RFA2;RFC2;BMH2;CTF18;SPT16;SWI1;PRI1;ABF1;SEN1;ORC1;POB3;MCM3;MCM4;TOP2;MCM6;TOP1	Upregulated
dephosphorylation (GO:0016311)	2.07e-10	2.33e-09	0.170914	0.879386	-1.16303	25.934	CET1;DET1;HAL5;PSR2;RTS1;PPH21;YVH1;PHO13;SIW14;THR4;CDC55;PPZ1;YOR283W;PTC5;PTC2;GLC7;PPT1;PSY4;PTC7;SAP190	Upregulated
protein localization to organelle (GO:0033365)	1.21e-09	1.24e-08	0.0659244	0.83674	-1.261	25.8916	ARL1;VPS9;MUK1;RTG2;BRO1;YPT52;YPT7;VPS74;CDC28;VPS21;GET1;GET3;GET2;GET4	Upregulated
peptide biosynthetic process (GO:0043043)	1.91e-08	1.63e-07	0.223248	0.909049	-1.43856	25.5719	DOM34;RPS5;RQC2;SUP35;RPS4B;CIC1;RSM7;MRPL11;RPS0A;RPL8B;MRPL40;PRC1;RPL1B;HBS1;UTP30;RPL8A	Upregulated
nonfunctional rRNA decay (GO:0070651)	2.85e-10	3.17e-09	0.0438235	0.770068	-1.16025	25.4986	DOM34;RRP4;DIS3;RRP43;RPT6;RRP40;CSL4;NPL4;XRN1;CDC48;HBS1;UFD1;RPT2;RRP45	Upregulated
tRNA-containing ribonucleoprotein complex export from nucleus (GO:0071431)	1.76e-08	1.52e-07	0.0483239	0.784525	-1.42112	25.378	UTP8;NUP116;CEX1;NUP133;SOL2;UTP22;NUP145;SOL1;RNA1;TEF1	Upregulated
NADP metabolic process (GO:0006739)	9.82e-08	7.24e-07	0.0792589	0.83674	-1.56613	25.2709	SOL4;ZWF1;POS5;SOL2;GND1;SOL3;TAL1;RKI1;SOL1;TKL1	Upregulated
chromatin silencing at telomere (GO:0006348)	1.96e-10	2.22e-09	0.291531	0.956964	-1.12984	25.2568	ASF1;BRE1;NUP133;NUP145;POL30;ISW2;PNC1;SCS2;RNA1;INO80;SIR2;SUB2;HAT2;NUP84;RAP1;HAT1;MRC1;MCM3;ITC1;NPT1;SCP160;FUN30;RKR1	Upregulated
negative regulation of cellular macromolecule biosynthetic process (GO:2000113)	1.79e-09	1.77e-08	0.121833	0.879386	-1.24407	25.0541	SNF1;NOT3;NOT5;EAF3;SSD1;PSK1;DHH1;NPL3;PSK2;PUF6;SIR2;CDC28;PCL8;MOT1;PHO85;ASC1	Upregulated
monocarboxylic acid biosynthetic process (GO:0072330)	1.2e-09	1.24e-08	0.0852788	0.83674	-1.20406	24.733	BNA3;ALD5;ALD6;ALD4;ABZ1;ECM31;ASN2;ASN1;ELO3;SPE3;ETR1;BIO4;DLD3;PAN6;PAN5	Upregulated
DNA replication (GO:0006260)	6.37e-10	6.78e-09	0.147344	0.879386	-1.16564	24.6809	CTF4;POL2;RFC5;POL1;SNF2;RFA1;RFC3;POL3;RFA2;RFC2;SPT16;SWI1;PRI1;ABF1;POB3;MRC1;TOP1;CCR4	Upregulated
disaccharide biosynthetic process (GO:0046351)	1.33e-07	9.47e-07	0.0411227	0.770068	-1.55162	24.5685	TSL1;UGP1;PGM2;TPS3;TPS2;TPS1;PGM1	Upregulated
membrane fusion (GO:0061025)	7.15e-10	7.5e-09	0.187302	0.879386	-1.16288	24.4892	NYV1;VTC1;VTC2;SEC17;VTC3;IVY1;VTC4;VAC8;SEC18;YTA12;DNM1;AFG3;VPS1;BPT1;MGM1;YCF1;YKT6;PAH1;PEP5	Upregulated
histone modification (GO:0016570)	2.34e-10	2.62e-09	0.455354	0.999856	-1.09888	24.3683	GIS1;ASF1;BRE1;ARP4;RVB2;RCO1;RVB1;SET2;GLC7;SIN3;SNT1;ACT1;GCN5;SPT20;TAF12;HOS3;SPT8;EAF3;TRA1;HDA1;HAT2;HAT1;TAF5;SGF73;ACS2;PEP5	Upregulated
aromatic amino acid family biosynthetic process (GO:0009073)	1.92e-08	1.63e-07	0.0384853	0.770068	-1.35712	24.1165	TRP5;TRP4;ABZ1;TRP3;ARO7;TRP2;ARO4;ARO2;ARO3	Upregulated
organonitrogen compound catabolic process (GO:1901565)	2.28e-08	1.93e-07	0.149363	0.879386	-1.36234	23.9695	APA1;APE2;TMA108;CIC1;MCX1;DPL1;NTA1;LAP2;NMA111;RPT2;STE23;APA2;RKR1;AAP1	Upregulated
trehalose biosynthetic process (GO:0005992)	1.33e-07	9.47e-07	0.0411227	0.770068	-1.50415	23.8168	TSL1;UGP1;PGM2;TPS3;TPS2;TPS1;PGM1	Upregulated
actin cortical patch assembly (GO:0000147)	2.75e-08	2.26e-07	0.0719967	0.83674	-1.36273	23.7245	AIM3;SYP1;AKL1;VRP1;ENT1;ENT2;END3;ENT4;ABP1;SLA2;SLA1	Upregulated
nuclear export (GO:0051168)	5.66e-08	4.41e-07	0.116174	0.879386	-1.41449	23.6031	NUP159;NUP82;NUP116;CSE1;GLE2;NUP133;NUP188;NUP145;NUP157;MSN5;CRM1;BCP1	Upregulated
cellular protein metabolic process (GO:0044267)	5.63e-10	6.12e-09	0.356805	0.956964	-1.10431	23.52	DOM34;ASK10;RPS5;SUP35;RPS4B;SPC2;YTA12;CIC1;RSM7;AFG3;MRPL11;RPS0A;VMA1;RPL8B;NTA1;MRPL40;RPL1B;CDC28;MCK1;HBS1;UTP30;PEP4;RPL8A	Upregulated
tRNA transport (GO:0051031)	7.69e-09	6.96e-08	0.0654262	0.83674	-1.2447	23.2553	UTP8;NUP116;CEX1;NUP133;SOL2;UTP22;NUP145;SOL1;SSA2;RNA1;TEF1;YDJ1	Upregulated
ribosomal small subunit biogenesis (GO:0042274)	3.47e-09	3.23e-08	0.429192	0.982589	-1.18345	23.0537	PRP43;RRP7;RRP5;KRR1;ROK1;UTP21;RPS5;DIP2;SGD1;IMP4;RSM7;RPS0A;EMG1;NOB1;NEW1;HAS1;HRR25;NOC4;KRE33;SQS1;UTP30;RIO1	Upregulated
nucleoside phosphate biosynthetic process (GO:1901293)	5.57e-07	3.35e-06	0.058709	0.80972	-1.59759	23.0062	APA1;PRS5;PRS2;PRS1;LSC1;PRS4;PRS3	Upregulated
fungal-type cell wall polysaccharide biosynthetic process (GO:0051278)	5.66e-08	4.41e-07	0.116174	0.879386	-1.37288	22.9087	PCM1;KRE5;BCH1;KAR2;CWH41;GAS1;BMH2;CHS3;BMH1;GAS3;ROT2;GFA1	Upregulated
mRNA transport (GO:0051028)	3.76e-09	3.47e-08	0.116788	0.879386	-1.174	22.7729	NUP116;HMT1;STO1;PSE1;CRM1;NPL3;SXM1;NUP82;THP2;MFT1;SUB2;NUP84;DBP5;MEX67;SGF73	Upregulated
mitochondria-associated ubiquitin-dependent protein catabolic process (GO:0072671)	1.33e-07	9.47e-07	0.0411227	0.770068	-1.43586	22.7354	RSP5;UBP6;CDC48;DOA1;BRO1;VMS1;NPL4	Upregulated
cortical actin cytoskeleton organization (GO:0030866)	1.11e-07	8e-07	0.107975	0.879386	-1.39609	22.3604	AIM3;SYP1;AKL1;VRP1;ENT1;ENT2;END3;ENT4;ABP1;SLA2;SLA1	Upregulated
trehalose metabolic process (GO:0005991)	1.85e-07	1.27e-06	0.0555286	0.80972	-1.44134	22.3456	TSL1;UGP1;PGM2;NTH1;TPS3;TPS2;TPS1;PGM1	Upregulated
double-strand break repair (GO:0006302)	1.31e-09	1.33e-08	0.525549	0.999856	-1.09062	22.3057	POL2;POL1;BRE1;NUP145;CTF18;SMC1;SIR2;RTT107;PDS5;RSC30;NUP84;CDC28;SFH1;SIN3;SNF2;RFA1;RFA2;NUP133;RSC1;STH1;RSC8;RSC2;MCK1;DOA1;FUN30	Upregulated
Golgi organization (GO:0007030)	4.85e-08	3.86e-07	0.143657	0.879386	-1.32074	22.2434	SEC23;COG1;MYO2;ERP1;ERP2;ERP4;GRH1;RET2;VPS74;YPT10;EMP24;EMP47;TIP20	Upregulated
amide biosynthetic process (GO:0043604)	6.07e-08	4.64e-07	0.193771	0.88189	-1.33119	22.1197	CPA2;CPA1;ARG1;ECM31;ASN2;RQC2;URA2;ASN1;SPE3;FOL2;MTD1;BIO4;PAN6;PAN5	Upregulated
regulation of transcription from RNA polymerase I promoter (GO:0006356)	7.76e-09	6.98e-08	0.111089	0.879386	-1.18108	22.0555	UTP15;UTP8;UME1;UTP5;UTP4;CKA2;CKA1;CKB2;RPD3;UTP9;NAN1;SIN3;RIO1;TAP42	Upregulated
mRNA-containing ribonucleoprotein complex export from nucleus (GO:0071427)	3.76e-09	3.47e-08	0.116788	0.879386	-1.12789	21.8785	NUP116;HMT1;STO1;PSE1;CRM1;NPL3;SXM1;NUP82;THP2;MFT1;SUB2;NUP84;DBP5;MEX67;SGF73	Upregulated
polyadenylation-dependent mRNA catabolic process (GO:0071047)	4.35e-08	3.5e-07	0.0625688	0.8221	-1.28506	21.7819	RRP6;RRP4;DIS3;RRP43;PAP2;RRP40;CSL4;RRP45;MTR4;DBP2	Upregulated
acetyl-CoA metabolic process (GO:0006084)	5.57e-07	3.35e-06	0.058709	0.80972	-1.51243	21.7799	MVD1;ERG12;CIT1;ERG13;ERG8;HMG1;ACS2	Upregulated
negative regulation of transcription from RNA polymerase II promoter (GO:0000122)	5.04e-10	5.52e-09	0.907766	0.999856	-1.01353	21.6981	GIS1;HIR1;TUP1;FHL1;ISW2;WTM1;RPD3;OPI1;NPL3;ABF1;RAD23;GAL11;RCO1;CDC28;GLC7;YTA7;SPT6;ITC1;PHO85;SIN3;MED2;NUP133;SPT8;RAT1;BMH1;STH1;HDA1;RSC9;RGR1;RAP1;MKS1;PAF1;LAP3;SKO1;FRA1;FUN30	Upregulated
cellular response to misfolded protein (GO:0071218)	1.57e-08	1.38e-07	0.0803622	0.83674	-1.17754	21.1593	TMC1;KRE5;CDC48;YHB1;UFD1;PMT6;UBR1;FES1;VMS1;NPL4;PMT2;PMT1	Upregulated
aromatic compound biosynthetic process (GO:0019438)	1.01e-07	7.38e-07	0.137019	0.879386	-1.31254	21.1407	BNA3;HIS2;HIS5;HIS4;HIS7;ARO7;RKI1;ARO4;ARO2;ARO3;THI80;HIS1	Upregulated
nuclear polyadenylation-dependent mRNA catabolic process (GO:0071042)	4.35e-08	3.5e-07	0.0625688	0.8221	-1.244	21.086	RRP6;RRP4;DIS3;RRP43;PAP2;RRP40;CSL4;RRP45;MTR4;DBP2	Upregulated
Golgi to plasma membrane transport (GO:0006893)	2.74e-08	2.26e-07	0.197427	0.890701	-1.20297	20.9456	RSN1;ARF2;PDR17;SEC3;SEC14;SEC4;SFH5;ARL1;SEC18;SNC1;CSR1;BCH1;VPS74;CHS5;GCS1	Upregulated
ER-associated misfolded protein catabolic process (GO:0071712)	5.57e-07	3.35e-06	0.058709	0.80972	-1.44854	20.8598	KRE5;CDC48;UFD1;PMT6;NPL4;PMT2;PMT1	Upregulated
ribosomal large subunit export from nucleus (GO:0000055)	8.16e-08	6.14e-07	0.165742	0.879386	-1.2762	20.8294	NUP159;NUP116;JJJ1;NIC96;NOG2;NMD3;CRM1;NUP82;RIX7;ARX1;NUG1;MEX67;BCP1	Upregulated
fungal-type cell wall organization (GO:0031505)	1.27e-08	1.12e-07	0.958941	0.999856	-1.14276	20.776	INP53;INP52;EMW1;PST1;SLG1;SLA2;CMP2;HSP150;MYO3;MYO5;MHP1;TPS2;PHO85;RHO2;SNF1;ACT1;PRS5;ZRG8;CNA1;PRS2;PRS1;PRS4;SBE22;PRS3;KTR6;BGL2;GAS1;CHS3;PMT6;SBE2;GAS3;CHS1;PMT2;PMT1	Upregulated
protein targeting (GO:0006605)	1.33e-09	1.34e-08	0.633731	0.999856	-1.01437	20.7322	HSP82;APL5;APL6;ARL1;SRP102;TOM71;SPC2;SRP101;MRS6;TOM70;VPS1;AST1;SNX4;VPS13;YDJ1;SRP1;VPS9;KAP95;APM3;LOA1;YPT52;PEP1;HSE1;VPS21;VPS45;SEC53;VPS27	Upregulated
rRNA 3'-end processing (GO:0031125)	5.66e-08	4.41e-07	0.116174	0.879386	-1.2384	20.6646	RRP6;RRP4;DIS3;RRP43;RRP40;CSL4;TSR1;REX2;RRP45;MTR4;RNH70;RPS0A	Upregulated
lysosomal microautophagy (GO:0016237)	2.54e-08	2.13e-07	0.345753	0.956964	-1.18095	20.6524	VTC1;VTC2;SLM4;VTC3;VTC4;VAC8;OSH3;SWH1;NVJ1;OSH2;SNX4;YPT7;CDC48;OSH7;OSH6;VPS30;KES1;PEP4	Upregulated
pentose-phosphate shunt (GO:0006098)	1.51e-07	1.04e-06	0.0682073	0.83674	-1.31308	20.6246	SOL4;ZWF1;SOL2;GND1;SOL3;TAL1;RKI1;SOL1;TKL1	Upregulated
negative regulation of transcription, DNA-templated (GO:0045892)	1.49e-09	1.49e-08	0.877212	0.999856	-1.01304	20.5875	GIS1;HIR1;HMT1;UME1;TUP1;ISW2;RPD3;OPI1;ABF1;RAD23;GAL11;RCO1;SET2;CDC28;YTA7;SPT6;MOT1;PHO85;SIN3;RIO1;MED2;NUP133;SPT8;EAF3;BMH1;HDA1;RGR1;RAP1;MKS1;PAF1;LAP3;SKO1;FUN30	Upregulated
organelle assembly (GO:0070925)	2.68e-08	2.24e-07	0.644904	0.999856	-1.17699	20.5202	SEC7;VAC8;GIN4;SEC18;ARP4;PAT1;DHH1;CDC3;EDC3;CDC10;PUB1;THP2;YPT52;CDC11;MFT1;CDC12;TUB4;SHS1;HRR25;SGT1;VPS30;VPS21;YPT1	Upregulated
regulation of RNA polymerase II transcriptional preinitiation complex assembly (GO:0045898)	3.51e-07	2.3e-06	0.0872772	0.83674	-1.37803	20.4818	POB3;RPT6;RPT4;RPT5;RPT2;MOT1;RPT3;SPT16;SGF73	Upregulated
chromatin assembly (GO:0031497)	4.85e-08	3.86e-07	0.143657	0.879386	-1.21566	20.4738	RLF2;ARP9;TUP1;ISW2;INO80;SPT16;STH1;CHD1;NAP1;RSC6;RSC3;SPT6;FUN30	Upregulated
histone acetylation (GO:0016573)	1.91e-08	1.63e-07	0.272123	0.945235	-1.1395	20.256	ACT1;GCN5;SPT20;ASF1;TAF12;SPT8;EAF3;TRA1;ARP4;ELP4;RVB2;RVB1;HAT2;HAT1;TAF5;SGF73;ACS2	Upregulated
glutamate metabolic process (GO:0006536)	1.51e-07	1.04e-06	0.0682073	0.83674	-1.28788	20.2288	MEU1;CAR2;GLT1;IDH1;PUT2;GDH1;IDH2;CIT1;IDP1	Upregulated
modification-dependent protein catabolic process (GO:0019941)	2.82e-09	2.64e-08	0.47053	0.999856	-1.02681	20.2156	RPN6;RSP5;RPN7;RPN2;RPN3;RPN10;RPN1;BRO1;NPL4;RPN8;RPN9;CDC34;NAS2;DDI1;RPN12;TOM1;UFD2;RPT5;RPT2;UBA1;RPT3;YDJ1;RKR1	Upregulated
positive regulation of gene expression (GO:0010628)	1.01e-07	7.38e-07	0.137019	0.879386	-1.25299	20.1816	DOM34;CTI6;SEC13;NUP133;RLI1;NUP145;NUP53;NUP84;YKR023W;CDC28;HBS1;RIO1	Upregulated
ubiquitin-dependent ERAD pathway (GO:0030433)	1.11e-08	9.89e-08	0.3435	0.956964	-1.08059	19.7963	CUE1;SEC13;RPT6;EPS1;HLJ1;UBR1;NPL4;UBX4;RAD23;KAR2;CDC48;RPT4;UFD2;RPT5;UFD1;RPT2;RPT3;YDJ1;VMS1	Upregulated
protein complex subunit organization (GO:0071822)	2.75e-08	2.26e-07	0.0719967	0.83674	-1.13617	19.7802	POM152;NUP116;POM34;NUP188;NUP53;SNL1;NIC96;NUP57;YTA12;SEH1;AFG3	Upregulated
negative regulation of gene expression (GO:0010629)	6.07e-08	4.64e-07	0.193771	0.88189	-1.17773	19.5698	SNF1;CLA4;NOT3;DIS3;NOT5;EAF3;SSD1;DHH1;NPL3;PUF6;MAP1;CDC28;MOT1;ASC1	Upregulated
RNA modification (GO:0009451)	3.77e-08	3.08e-07	0.17084	0.879386	-1.13937	19.4761	NOP56;PUS4;TRM2;ALA1;NOP2;DIM1;PUS7;DUS1;TRM7;DUS3;RCM1;PAP2;TAN1;NCL1	Upregulated
steroid biosynthetic process (GO:0006694)	3.51e-07	2.3e-06	0.0872772	0.83674	-1.30119	19.3398	MVD1;PDR17;PDR16;ERG1;ERG11;ERG3;ERG4;NSG1;HMG1	Upregulated
glycogen metabolic process (GO:0005977)	5.66e-08	4.41e-07	0.116174	0.879386	-1.15869	19.3345	GPH1;GLC3;GSY2;UGP1;GSY1;GLC7;PGM2;BMH2;BMH1;GLG1;PGM1;AAP1	Upregulated
threonine metabolic process (GO:0006566)	5.57e-07	3.35e-06	0.058709	0.80972	-1.34182	19.3229	HOM6;THR4;CHA1;GLY1;HOM3;ILV1;HOM2	Upregulated
glutamate biosynthetic process (GO:0006537)	5.16e-07	3.21e-06	0.0741559	0.83674	-1.33388	19.3097	MEU1;GLT1;IDH1;PUT2;GDH1;IDH2;CIT1;IDP1	Upregulated
actin filament capping (GO:0051693)	5.57e-07	3.35e-06	0.058709	0.80972	-1.33234	19.1865	AIM3;CAP1;AIP1;TWF1;BNI1;ABP1;CAP2	Upregulated
cytoplasmic translation (GO:0002181)	9.55e-08	7.07e-07	0.985979	0.999856	-1.17211	18.9462	RPL5;RPL3;RPL10;TIF3;RPS4B;RPS0A;RPL7A;SSZ1;TIF34;TMA19;RPL18B;MRPL6;RPL1B;SUP45;RPS3;LHS1;RBG1;RBG2;TAE1;GIR2;RPS5;SUP35;RPS1A;AFG3;RPS1B;TRM7;RPL8B;RPL4A;RPL4B;SSB2;RPP0;CLU1;PRT1;RPL8A	Upregulated
L-methionine salvage (GO:0071267)	1.49e-06	7.77e-06	0.06097	0.815272	-1.39919	18.7707	MEU1;SAM4;ADI1;UTR4;MDE1;MRI1	Upregulated
glycoprotein metabolic process (GO:0009100)	5.16e-07	3.21e-06	0.0741559	0.83674	-1.28957	18.6683	MNN1;HOC1;RAD23;KRE2;KTR3;OCH1;GTB1;ROT2	Upregulated
regulation of response to endoplasmic reticulum stress (GO:1905897)	1.49e-06	7.77e-06	0.06097	0.815272	-1.38138	18.5317	YAP1;SKN7;PMT4;YPT1;PMT2;PMT1	Upregulated
nucleocytoplasmic transport (GO:0006913)	4.03e-07	2.58e-06	0.120086	0.879386	-1.25417	18.4662	NPA3;POM152;MAD1;POM34;NUP157;FMP52;TOM1;SEH1;SXM1;IWR1	Upregulated
isopentenyl diphosphate biosynthetic process (GO:0009240)	1.64e-05	6.61e-05	0.0911733	0.83674	-1.67227	18.4241	IDI1;MVD1;ERG12;ERG8;HMG1	Upregulated
heterocycle biosynthetic process (GO:0018130)	2.06e-07	1.39e-06	0.129249	0.879386	-1.19397	18.3833	PRO2;BNA3;HIS2;LIP5;PRO1;HIS5;BIO4;HIS4;PRO3;HIS7;HIS1	Upregulated
lipid transport (GO:0006869)	6.07e-08	4.64e-07	0.193771	0.88189	-1.10373	18.3401	PDR17;PDR16;SEC14;SFH5;OSH3;SWH1;FAA1;OSH2;FAA4;YBT1;CSR1;OSH7;OSH6;KES1	Upregulated
regulation of cell size (GO:0008361)	1.34e-07	9.48e-07	0.189425	0.879386	-1.14422	18.1106	FKS1;JJJ1;PIH1;PRS3;SKN7;SSF1;SLT2;SFP1;WHI3;WHI4;HXK2;TOM1;RHO1	Upregulated
nucleosome mobilization (GO:0042766)	1.25e-06	6.77e-06	0.096107	0.847911	-1.31371	17.8565	SNF2;ARP9;ARP7;ARP5;IES1;INO80;CHD1;FUN30	Upregulated
protein dephosphorylation (GO:0006470)	4.07e-08	3.31e-07	0.322144	0.956964	-1.04875	17.8464	HAL5;PSR2;RTS1;RTR1;PPH21;YVH1;PHO13;SIW14;CDC55;PPZ1;PTC5;PTC2;GLC7;PPT1;PSY4;PTC7;FCP1	Upregulated
barbed-end actin filament capping (GO:0051016)	5.57e-07	3.35e-06	0.058709	0.80972	-1.23192	17.7403	AIM3;CAP1;AIP1;TWF1;BNI1;ABP1;CAP2	Upregulated
negative regulation of translation (GO:0017148)	6.07e-08	4.64e-07	0.193771	0.88189	-1.06576	17.7092	SNF1;TIF5;NOT3;NOT5;PAT1;SSD1;DHH1;NPL3;PSK2;PUF6;WHI3;WHI4;XRN1;ASC1	Upregulated
snoRNA processing (GO:0043144)	2.05e-07	1.39e-06	0.098437	0.849933	-1.14691	17.6602	PRP4;SEN1;XRN1;NRD1;NOP1;CTR9;PAF1;PTI1;RAT1;RNT1	Upregulated
protein O-linked glycosylation (GO:0006493)	2.06e-07	1.39e-06	0.129249	0.879386	-1.14016	17.5548	DPM1;MNN1;OST3;KRE2;PMT4;KTR3;PMT6;KTR1;KTR6;PMT2;PMT1	Upregulated
internal peptidyl-lysine acetylation (GO:0018393)	9.35e-08	6.96e-07	0.323508	0.956964	-1.08274	17.5249	ACT1;GCN5;SPT20;ASF1;TAF12;SPT8;EAF3;TRA1;ARP4;RVB2;RVB1;HAT2;HAT1;TAF5;SGF73;ACS2	Upregulated
Rab protein signal transduction (GO:0032482)	2.72e-06	1.34e-05	0.121327	0.879386	-1.35357	17.348	YPT31;YPT6;YPT52;YPT7;SEC4;YPT10;VPS21;YPT1	Upregulated
sulfur amino acid metabolic process (GO:0000096)	2.72e-06	1.34e-05	0.121327	0.879386	-1.35135	17.3196	SAH1;MET14;SAM4;SAM1;ADI1;SAM2;MET5;MET17	Upregulated
leading strand elongation (GO:0006272)	1.25e-06	6.77e-06	0.096107	0.847911	-1.26251	17.1605	POL2;POL32;RFC5;POL1;RFC3;RFC1;RFC2;POL30	Upregulated
pentose-phosphate shunt, oxidative branch (GO:0009051)	5.57e-06	2.48e-05	0.0861867	0.83674	-1.41827	17.1586	SOL4;ZWF1;SOL2;GND1;SOL3;SOL1	Upregulated
methionine biosynthetic process (GO:0009086)	1.73e-06	8.8e-06	0.0802619	0.83674	-1.27786	16.9535	MET12;HOM6;MET22;MET13;HOM3;HOM2;MET6	Upregulated
5-phosphoribose 1-diphosphate biosynthetic process (GO:0006015)	1.64e-05	6.61e-05	0.0911733	0.83674	-1.5371	16.9349	PRS5;PRS2;PRS1;PRS4;PRS3	Upregulated
cellular response to topologically incorrect protein (GO:0035967)	7.46e-07	4.23e-06	0.109188	0.879386	-1.19927	16.9202	TMC1;SSZ1;KAR2;SSB2;SSQ1;SSA2;YHB1;SSC1;LHS1	Upregulated
tRNA processing (GO:0008033)	9.35e-08	6.96e-07	0.323508	0.956964	-1.04342	16.8884	PUS4;TRL1;TRM2;ALA1;POP1;DUS1;DUS3;PTA1;TRZ1;CEG1;SEN1;NRD1;PAP2;TAN1;RPP1;TPT1	Upregulated
aspartate family amino acid metabolic process (GO:0009066)	5.57e-06	2.48e-05	0.0861867	0.83674	-1.39358	16.8598	SAH1;SAM1;ADI1;SAM2;NIT3;MET17	Upregulated
endosome transport via multivesicular body sorting pathway (GO:0032509)	2.92e-07	1.95e-06	0.184236	0.879386	-1.11822	16.8269	PKH2;RSP5;PKH1;YPT52;VPS4;SEC28;VTA1;SEC27;VPS9;VPS21;MUK1;ELO3	Upregulated
farnesyl diphosphate biosynthetic process (GO:0045337)	1.64e-05	6.61e-05	0.0911733	0.83674	-1.52285	16.778	IDI1;ERG12;ERG20;ERG13;ERG8	Upregulated
mitochondrial transport (GO:0006839)	8.16e-08	6.14e-07	0.559766	0.999856	-1.02358	16.7059	ODC2;HSP60;HSP82;PAM17;DJP1;SSC1;TOM71;YME1;TOM40;YTA12;MCX1;CYT1;AFG3;TOM70;TIM50;TIM21;TIM23;YDJ1;MIC60;PET9	Upregulated
tRNA wobble base modification (GO:0002097)	2.92e-07	1.95e-06	0.184236	0.879386	-1.10499	16.6278	NFS1;TUM1;NBP35;HRR25;ELP2;KRE33;KTI12;ELP3;ELP4;NCS6;SAP190;IKI3	Upregulated
positive regulation of protein localization to nucleus (GO:1900182)	5.57e-06	2.48e-05	0.0861867	0.83674	-1.37174	16.5956	CET1;CDC55;CLA4;CDC48;UFD1;NPL4	Upregulated
protein maturation (GO:0051604)	2.15e-07	1.45e-06	0.324776	0.956964	-1.07867	16.5615	LIP5;HSP60;HSP82;SSQ1;YME1;MAS2;MAS1;ICP55;COR1;MAP2;MAP1;QCR2;GCV3;MET18;COX20	Upregulated
septin cytoskeleton organization (GO:0032185)	1.25e-06	6.77e-06	0.096107	0.847911	-1.2142	16.5039	CDC42;RGA2;SYP1;CLA4;RGA1;CDC24;BEM3;BUD4	Upregulated
chromatin silencing at silent mating-type cassette (GO:0030466)	3.1e-07	2.06e-06	0.352542	0.956964	-1.10082	16.4978	ASF1;NUP133;POL30;MGA2;SIR2;ABF1;MSH2;ORC1;NUP84;RAP1;MRC1;MCM3;NAM7;SCP160;FUN30	Upregulated
N-glycan processing (GO:0006491)	1.73e-06	8.8e-06	0.0802619	0.83674	-1.2435	16.4977	MNN1;HOC1;KRE2;KTR3;OCH1;GTB1;ROT2	Upregulated
positive regulation of transcription from RNA polymerase II promoter in response to stress (GO:0036003)	6.41e-08	4.87e-07	0.297286	0.956964	-0.992971	16.4459	YAP1;SNF2;ZAP1;BCY1;SKN7;YAK1;MSN4;SWI4;SWI1;MSN2;MGA2;HOG1;SWI6;HSF1;SKO1;SIN3	Upregulated
vesicle fusion (GO:0006906)	4.94e-07	3.1e-06	0.325921	0.956964	-1.13129	16.4275	SEC22;NYV1;SEC4;SED5;SEC17;SEC18;SNC1;YPT7;HRR25;SLY1;VPS45;YKT6;YPT1;BET1	Upregulated
positive regulation of transcription initiation from RNA polymerase II promoter (GO:0060261)	7.46e-07	4.23e-06	0.109188	0.879386	-1.1621	16.3958	XRN1;POB3;RPT6;RPT4;RPT5;RPT2;RPT3;SPT16;SGF73	Upregulated
positive regulation of transcription from RNA polymerase I promoter (GO:0045943)	6.28e-07	3.71e-06	0.178	0.879386	-1.14814	16.3956	UTP15;UTP8;NAN1;UTP5;UTP4;CTR9;SPT5;PAF1;CDC73;TAP42;UTP9	Upregulated
tRNA wobble uridine modification (GO:0002098)	4.74e-07	3e-06	0.210367	0.890701	-1.11692	16.2649	NCS2;NFS1;TUM1;NBP35;HRR25;ELP2;KTI12;ELP3;ELP4;NCS6;SAP190;IKI3	Upregulated
Golgi to plasma membrane protein transport (GO:0043001)	1.25e-06	6.77e-06	0.096107	0.847911	-1.19386	16.2273	CSR1;PDR17;SEC14;SFH5;VPS74;ARL1;SEC18;GCS1	Upregulated
snRNA 3'-end processing (GO:0034472)	1.11e-07	8e-07	0.107975	0.879386	-1.01257	16.2176	RRP6;RRP4;NRD1;RRP43;PAP2;RRP40;REX2;RRP45;MTR4;RNH70;RNT1	Upregulated
lipid biosynthetic process (GO:0008610)	4.74e-07	3e-06	0.210367	0.890701	-1.11351	16.2153	PDR17;URA8;PDR16;URA7;GPT2;SCS2;ERG20;ELO3;OPI1;ETR1;HMG1;PAH1	Upregulated
phosphatidylinositol metabolic process (GO:0046488)	4.74e-07	3e-06	0.210367	0.890701	-1.11326	16.2115	CDS1;CSR1;INP53;INP52;VAC14;SEC14;SFH5;STT4;VPS30;FAB1;PIK1;SAC1	Upregulated
glucan biosynthetic process (GO:0009250)	1.73e-06	8.8e-06	0.0802619	0.83674	-1.21998	16.1856	GLC3;GSY2;UGP1;GSY1;PGM2;GLG1;PGM1	Upregulated
positive regulation of RNA polymerase II transcriptional preinitiation complex assembly (GO:0045899)	1.25e-06	6.77e-06	0.096107	0.847911	-1.19049	16.1816	POB3;RPT6;RPT4;RPT5;RPT2;RPT3;SPT16;SGF73	Upregulated
intracellular protein transmembrane transport (GO:0065002)	3.66e-07	2.39e-06	0.15263	0.879386	-1.09083	16.1658	SEC66;SRP72;KAR2;SSA2;SRP54;LHS1;SRP68;SEC62;SEC72;SIL1;SEC63	Upregulated
ribosome localization (GO:0033750)	2.72e-06	1.34e-05	0.121327	0.879386	-1.24263	15.9262	LSG1;RLI1;SRM1;RIX1;SSB2;ZUO1;RNA1;GSP2	Upregulated
nucleobase biosynthetic process (GO:0046112)	5.57e-06	2.48e-05	0.0861867	0.83674	-1.31551	15.9154	MTD1;URA8;URA7;SER1;MIS1;ADE3	Upregulated
Golgi to endosome transport (GO:0006895)	4.03e-07	2.58e-06	0.120086	0.879386	-1.07577	15.8394	GGA2;GGA1;YPT52;VPS9;VPS21;MUK1;VPS45;CHC1;DOP1;PEP5	Upregulated
chronological cell aging (GO:0001300)	6.28e-07	3.71e-06	0.178	0.879386	-1.10657	15.802	SIR2;ACT1;GCN2;GIS1;MDH1;ALT1;CKA2;NDE1;NDI1;PGA3;DNM1	Upregulated
glycogen biosynthetic process (GO:0005978)	1.73e-06	8.8e-06	0.0802619	0.83674	-1.19093	15.8002	GLC3;GSY2;UGP1;GSY1;PGM2;GLG1;PGM1	Upregulated
5-phosphoribose 1-diphosphate metabolic process (GO:0046391)	1.64e-05	6.61e-05	0.0911733	0.83674	-1.43387	15.7976	PRS5;PRS2;PRS1;PRS4;PRS3	Upregulated
mRNA processing (GO:0006397)	1.48e-07	1.03e-06	0.947042	0.999856	-0.999522	15.7185	PRP21;PRP3;SNU71;NAB6;PRP4;HSH155;STO1;CTR9;NPL3;CDC73;ABD1;SEN1;NRD1;RTT103;CDC28;SPT5;CET1;MSL5;SNU66;SNU114;BRR2;CUS1;CEG1;WHI3;WHI4;SUB2;MTF2;PAF1;SQS1	Upregulated
macroautophagy (GO:0016236)	1.42e-07	1e-06	0.605888	0.999856	-0.994597	15.6849	SEC24;ARF2;SEC23;COG4;STT4;ARL1;RAS2;VAC8;SEC18;DNM1;GEA2;YPT6;VPS4;YPT7;PRC1;CDC48;VPS30;PMR1;PEP4;YPT1	Upregulated
cellular ion homeostasis (GO:0006873)	6.28e-07	3.71e-06	0.178	0.879386	-1.09825	15.6832	HRK1;PDR5;YVC1;CMP2;HAL5;TRK1;CNA1;KKQ8;GLC7;PGM2;SNQ2	Upregulated
polyadenylation-dependent snoRNA 3'-end processing (GO:0071051)	7.46e-07	4.23e-06	0.109188	0.879386	-1.10977	15.6575	RRP6;RRP4;DIS3;RRP43;PAP2;RRP40;CSL4;RRP45;MTR4	Upregulated
ncRNA 3'-end processing (GO:0043628)	4.03e-07	2.58e-06	0.120086	0.879386	-1.06004	15.6079	TRZ1;SEN1;DIS3;NRD1;RRP43;RRP40;CSL4;CTR9;PAF1;PTI1	Upregulated
protein transmembrane import into intracellular organelle (GO:0044743)	5.43e-07	3.35e-06	0.659034	0.999856	-1.08138	15.6002	HSP60;PAM17;MDH2;DJP1;SSC1;YME1;TOM40;YTA12;MCX1;PEX25;AFG3;TOM70;TIM50;TIM21;TIM54;GPD1;CAJ1;TIM23;MIC60	Upregulated
COPII-coated vesicle budding (GO:0090114)	1.73e-06	8.8e-06	0.0802619	0.83674	-1.16846	15.5021	SEC13;SEC24;SFB3;SEC23;SFB2;YPT1;SEC31	Upregulated
positive regulation of transport (GO:0051050)	4.44e-06	2.09e-05	0.105775	0.879386	-1.24829	15.3863	RSP5;ASK10;FKS1;RGC1;SLG1;SEC1;RHO1	Upregulated
ribosome-associated ubiquitin-dependent protein catabolic process (GO:1990116)	5.57e-06	2.48e-05	0.0861867	0.83674	-1.27113	15.3784	CDC48;RQC2;UFD1;UBR1;NPL4;RKR1	Upregulated
nuclear RNA surveillance (GO:0071027)	7.46e-07	4.23e-06	0.109188	0.879386	-1.08059	15.2459	RRP6;DIS3;NRD1;RRP43;HRB1;PIN4;RAT1;RRP45;GBP2	Upregulated
vacuole fusion (GO:0097576)	1.48e-07	1.03e-06	0.243551	0.909573	-0.968633	15.2313	NYV1;VTC1;VTC2;SEC17;VTC3;IVY1;VTC4;VAC8;SEC18;BPT1;YCF1;YKT6;PAH1;PEP5	Upregulated
cell wall mannoprotein biosynthetic process (GO:0000032)	7.5e-07	4.23e-06	0.144131	0.879386	-1.07823	15.207	ANP1;PMI40;HOC1;PSA1;VAN1;KRE2;MNN9;KTR3;KTR1;KTR6	Upregulated
mannoprotein biosynthetic process (GO:0006057)	7.5e-07	4.23e-06	0.144131	0.879386	-1.07525	15.165	ANP1;PMI40;HOC1;PSA1;VAN1;KRE2;MNN9;KTR3;KTR1;KTR6	Upregulated
cargo loading into COPII-coated vesicle (GO:0090110)	5.57e-06	2.48e-05	0.0861867	0.83674	-1.24794	15.0978	SEC13;SEC24;SFB3;SEC23;SFB2;SEC31	Upregulated
protein insertion into membrane (GO:0051205)	5.57e-06	2.48e-05	0.0861867	0.83674	-1.2367	14.9619	YLH47;MDM38;GET1;GET3;GET2;GET4	Upregulated
L-methionine salvage from methylthioadenosine (GO:0019509)	1.64e-05	6.61e-05	0.0911733	0.83674	-1.35002	14.8737	MEU1;ADI1;UTR4;MDE1;MRI1	Upregulated
cell wall glycoprotein biosynthetic process (GO:0031506)	7.5e-07	4.23e-06	0.144131	0.879386	-1.05389	14.8637	ANP1;PMI40;HOC1;PSA1;VAN1;KRE2;MNN9;KTR3;KTR1;KTR6	Upregulated
mannose metabolic process (GO:0006013)	1.64e-05	6.61e-05	0.0911733	0.83674	-1.33094	14.6635	AMS1;HXK1;HXK2;GLK1;SEC53	Upregulated
branched-chain amino acid metabolic process (GO:0009081)	5.57e-06	2.48e-05	0.0861867	0.83674	-1.20613	14.5921	ILV5;ILV6;BAT1;ILV3;BAT2;ILV2	Upregulated
vacuole fusion, non-autophagic (GO:0042144)	1.48e-07	1.03e-06	0.243551	0.909573	-0.926867	14.5746	NYV1;VTC1;VTC2;SEC17;VTC3;IVY1;VTC4;VAC8;SEC18;BPT1;YCF1;YKT6;PAH1;PEP5	Upregulated
peptide catabolic process (GO:0043171)	9.92e-06	4.21e-05	0.135085	0.879386	-1.26429	14.5656	APE2;TMA108;RPT2;DUG1;DUG2;STE23;AAP1	Upregulated
small GTPase mediated signal transduction (GO:0007264)	3.66e-07	2.39e-06	0.15263	0.879386	-0.973785	14.4313	RGA2;CDC24;CDC25;RGD2;TPK1;RSR1;BMH2;BMH1;SRV2;RHO1;RHO2	Upregulated
rRNA-containing ribonucleoprotein complex export from nucleus (GO:0071428)	7.51e-07	4.23e-06	0.237972	0.909573	-1.02057	14.3922	LSG1;RLI1;SRM1;RIX1;RPS5;SSB2;ZUO1;RPS3;RNA1;RPS2;GSP2;RPS0A	Upregulated
exonucleolytic trimming to generate mature 3'-end of 5.8S rRNA from tricistronic rRNA transcript (SSU-rRNA, 5.8S rRNA, LSU-rRNA) (GO:0000467)	4.03e-07	2.58e-06	0.120086	0.879386	-0.977171	14.3877	RRP6;RRP4;DIS3;RRP43;RRP40;CSL4;REX2;RRP45;MTR4;RNH70	Upregulated
monocarboxylic acid metabolic process (GO:0032787)	2.27e-06	1.14e-05	0.198834	0.890701	-1.10411	14.3498	LPD1;SCS7;IAH1;MAE1;ALD4;PDC1;CDC19;FDC1;ETR1;NIT3	Upregulated
glycoprotein biosynthetic process (GO:0009101)	1.33e-06	7.05e-06	0.17044	0.879386	-1.05822	14.3177	MNN2;ALG9;PMI40;OST3;PSA1;ALG12;ALG1;GDA1;MNN11;MNN5	Upregulated
U4 snRNA 3'-end processing (GO:0034475)	7.46e-07	4.23e-06	0.109188	0.879386	-1.0079	14.2202	RRP6;RRP4;RRP43;PAP2;RRP40;REX2;RRP45;MTR4;RNT1	Upregulated
protein processing (GO:0016485)	4.94e-07	3.1e-06	0.325921	0.956964	-0.970645	14.0948	SPC2;YTA12;AFG3;MAS2;MAS1;ICP55;COR1;MAP2;PRC1;PSD1;MAP1;QCR2;PEP4;COX20	Upregulated
actin filament bundle organization (GO:0061572)	1.33e-06	7.05e-06	0.17044	0.879386	-1.03873	14.054	SAC6;YSC84;BUD6;BNI1;LSB3;SLM1;TEF1;RHO3;RHO1;RHO2	Upregulated
peptidyl-serine phosphorylation (GO:0018105)	3.36e-07	2.23e-06	0.297646	0.956964	-0.941657	14.0363	PKH2;PKH1;TPK1;CKA2;CKA1;CKB2;PKC1;DUN1;YPK1;DBF2;HRR25;YPK2;CDC28;MCK1	Upregulated
positive regulation of nucleic acid-templated transcription (GO:1903508)	5.42e-06	2.48e-05	0.149658	0.879386	-1.15324	13.9839	CTI6;SEC13;NUP133;NUP145;NUP53;NUP84;YKR023W;CDC28	Upregulated
actin filament bundle assembly (GO:0051017)	1.33e-06	7.05e-06	0.17044	0.879386	-1.03212	13.9646	SAC6;YSC84;BUD6;BNI1;LSB3;SLM1;TEF1;RHO3;RHO1;RHO2	Upregulated
protein localization to plasma membrane (GO:0072659)	1.04e-06	5.83e-06	0.205203	0.890701	-1.00754	13.8777	CSR1;PDR17;SEC14;SEC4;SFH5;VPS74;ARL1;ENT4;SEC18;GCS1;SLM1	Upregulated
regulation of endoplasmic reticulum unfolded protein response (GO:1900101)	5.57e-06	2.48e-05	0.0861867	0.83674	-1.1449	13.8512	YAP1;SKN7;PMT4;YPT1;PMT2;PMT1	Upregulated
fatty acid biosynthetic process (GO:0006633)	1.33e-06	7.05e-06	0.17044	0.879386	-1.01617	13.7488	EHT1;TSC13;LIP5;FAS1;FAS2;ELO3;IFA38;OLE1;ACC1;ETR1	Upregulated
regulation of cytoplasmic mRNA processing body assembly (GO:0010603)	2.72e-06	1.34e-05	0.121327	0.879386	-1.07252	13.746	PKH2;PKH1;TPK1;BCY1;CDC39;RAS2;PKC1;DHH1	Upregulated
nuclear transport (GO:0051169)	2.74e-06	1.34e-05	0.161175	0.879386	-1.07278	13.7384	NPA3;POM152;MAD1;POM34;NUP157;TOM1;SEH1;SXM1;IWR1	Upregulated
trehalose metabolism in response to stress (GO:0070413)	1.64e-05	6.61e-05	0.0911733	0.83674	-1.24138	13.6769	HSP104;TSL1;TPS3;TPS2;TPS1	Upregulated
tRNA catabolic process (GO:0016078)	1.47e-06	7.74e-06	0.133869	0.879386	-1.01843	13.6747	RRP6;RRP4;DIS3;RRP43;PAP2;RRP40;CSL4;RRP45;MTR4	Upregulated
nuclear polyadenylation-dependent rRNA catabolic process (GO:0071035)	7.5e-07	4.23e-06	0.144131	0.879386	-0.968832	13.6641	RRP6;RRP4;DIS3;RRP43;PAP2;RRP40;CSL4;RAT1;RRP45;MTR4	Upregulated
arginine metabolic process (GO:0006525)	9.92e-06	4.21e-05	0.135085	0.879386	-1.18525	13.655	CAR2;CPA2;CPA1;ARG3;ARG1;URA2;ARG8	Upregulated
termination of RNA polymerase II transcription (GO:0006369)	2.63e-06	1.31e-05	0.264324	0.926668	-1.06078	13.6281	PTA1;SEN1;NRD1;ISW1;ISW2;GLC7;PTI1;RPB3;RAT1;CHD1;RNT1	Upregulated
RNA transport (GO:0050658)	5.42e-06	2.48e-05	0.149658	0.879386	-1.12001	13.581	NUP116;GLE2;NUP133;NUP188;NUP145;NUP157;MSN5;RNA1	Upregulated
nuclear polyadenylation-dependent tRNA catabolic process (GO:0071038)	1.47e-06	7.74e-06	0.133869	0.879386	-1.01127	13.5786	RRP6;RRP4;DIS3;RRP43;PAP2;RRP40;CSL4;RRP45;MTR4	Upregulated
phospholipid biosynthetic process (GO:0008654)	7.51e-07	4.23e-06	0.237972	0.909573	-0.959029	13.5243	IDI1;SLC1;PDR17;URA8;PDR16;URA7;GPT2;SCS2;ERG20;OPI1;YKR070W;PAH1	Upregulated
ribose phosphate biosynthetic process (GO:0046390)	5.37e-05	0.000187879	0.127219	0.879386	-1.36956	13.4652	PRS5;PRS2;PRS1;PRS4;PRS3	Upregulated
cargo loading into vesicle (GO:0035459)	5.57e-06	2.48e-05	0.0861867	0.83674	-1.11259	13.4604	SEC13;SEC24;SFB3;SEC23;SFB2;SEC31	Upregulated
peptidyl-serine modification (GO:0018209)	7.15e-07	4.2e-06	0.354789	0.956964	-0.9489	13.4279	PKH2;PKH1;TPK1;CKA2;CKA1;CKB2;PKC1;DUN1;YPK1;DBF2;HRR25;YPK2;CDC28;MCK1	Upregulated
nuclear mRNA surveillance (GO:0071028)	1.68e-06	8.69e-06	0.23405	0.909573	-1.009	13.4168	RRP6;DIS3;NRD1;RRP43;PAP2;HRB1;PIN4;RAT1;RRP45;GBP2;MTR4	Upregulated
glycerophospholipid biosynthetic process (GO:0046474)	2.63e-06	1.31e-05	0.264324	0.926668	-1.04426	13.4159	CDS1;SAH1;SLC1;VAC14;PSD1;CHO2;VPS30;AYR1;KAP95;YKR070W;CKI1	Upregulated
positive regulation of reproductive process (GO:2000243)	5.37e-05	0.000187879	0.127219	0.879386	-1.36337	13.4044	SNF2;CDC28;STE2;SWI3;SWI1	Upregulated
regulation of transcription initiation from RNA polymerase II promoter (GO:0060260)	2e-05	7.84e-05	0.167893	0.879386	-1.23714	13.3832	XRN1;ISW1;CTR9;SPT6;MOT1;SPT16;CHD1	Upregulated
valine metabolic process (GO:0006573)	5.57e-06	2.48e-05	0.0861867	0.83674	-1.10554	13.3751	ILV5;BAT1;LPD1;BAT2;PAN6;PAN5	Upregulated
arginine biosynthetic process (GO:0006526)	9.92e-06	4.21e-05	0.135085	0.879386	-1.15725	13.3324	ARG4;CPA2;CPA1;ARG3;ARG1;URA2;ARG8	Upregulated
pyrimidine nucleobase biosynthetic process (GO:0019856)	4.44e-06	2.09e-05	0.105775	0.879386	-1.07785	13.2855	CPA2;URA8;URA7;URA5;URA4;URA2;URA1	Upregulated
nuclear-transcribed mRNA catabolic process, 3'-5' exonucleolytic nonsense-mediated decay (GO:0070478)	2.74e-06	1.34e-05	0.161175	0.879386	-1.03658	13.2748	RRP4;SKI3;DIS3;RRP43;RRP40;CSL4;SKI2;NAM7;RRP45	Upregulated
organic hydroxy compound biosynthetic process (GO:1901617)	1.04e-06	5.83e-06	0.205203	0.890701	-0.961586	13.2447	MVD1;PDR17;PDR16;DLD3;ERG1;RKI1;ERG11;ERG3;ERG4;NSG1;HMG1	Upregulated
positive regulation of cellular protein localization (GO:1903829)	1.64e-05	6.61e-05	0.0911733	0.83674	-1.20015	13.2225	CET1;CDC55;CDC48;UFD1;NPL4	Upregulated
apoptotic process (GO:0006915)	2.27e-06	1.14e-05	0.198834	0.890701	-1.01438	13.1836	KEX1;NUC1;HSP60;MCA1;OYE2;NMA111;POR1;TDH3;TDH2;PET9	Upregulated
exonucleolytic trimming involved in rRNA processing (GO:0000459)	1.33e-06	7.05e-06	0.17044	0.879386	-0.963335	13.0339	RRP6;RRP4;DIS3;RRP43;RRP40;CSL4;REX2;RRP45;MTR4;RNH70	Upregulated
nuclear polyadenylation-dependent ncRNA catabolic process (GO:0071046)	1.33e-06	7.05e-06	0.17044	0.879386	-0.961435	13.0082	RRP6;RRP4;DIS3;RRP43;PAP2;RRP40;CSL4;RAT1;RRP45;MTR4	Upregulated
terpenoid biosynthetic process (GO:0016114)	5.37e-05	0.000187879	0.127219	0.879386	-1.32177	12.9953	IDI1;ERG12;ERG20;ERG13;ERG8	Upregulated
regulation of nuclear cell cycle DNA replication (GO:0033262)	1.64e-05	6.61e-05	0.0911733	0.83674	-1.17099	12.9013	HOG1;MRC1;RSC3;CDC28;SFH1	Upregulated
mRNA pseudouridine synthesis (GO:1990481)	5.37e-05	0.000187879	0.127219	0.879386	-1.31171	12.8965	CBF5;PUS4;DEG1;PUS1;PUS7	Upregulated
proteasome regulatory particle assembly (GO:0070682)	9.92e-06	4.21e-05	0.135085	0.879386	-1.11449	12.8398	NAS6;NAS2;RPT6;RPT4;RPT5;RPT2;RPT3	Upregulated
protein localization to endosome (GO:0036010)	1.64e-05	6.61e-05	0.0911733	0.83674	-1.15281	12.701	YPT52;VPS9;VPS21;MUK1;BRO1	Upregulated
cytoplasmic translational initiation (GO:0002183)	4.85e-06	2.25e-05	0.190893	0.879386	-1.02731	12.5709	TIF34;TIF5;TIF3;TMA64;CLU1;PRT1;PAT1;SUI2;GCD11	Upregulated
leucine metabolic process (GO:0006551)	1.56e-05	6.46e-05	0.116229	0.879386	-1.13328	12.5439	BAT1;LPD1;BAT2;LEU1;LEU4;LEU9	Upregulated
negative regulation of chromatin organization (GO:1905268)	3.64e-05	0.00013411	0.150741	0.879386	-1.22295	12.5	ISW1;RAP1;YTA7;RTG2;ADR1;CHD1	Upregulated
aromatic amino acid family metabolic process (GO:0009072)	3.64e-05	0.00013411	0.150741	0.879386	-1.2167	12.4362	TYR1;ARO8;ARO7;ARO4;ARO2;ARO3	Upregulated
porphyrin-containing compound biosynthetic process (GO:0006779)	2e-05	7.84e-05	0.167893	0.879386	-1.14485	12.3849	HEM1;HEM3;HEM15;HEM2;HEM14;HEM13;HEM12	Upregulated
cation homeostasis (GO:0055080)	9.92e-06	4.21e-05	0.135085	0.879386	-1.07285	12.3601	PDR5;YVC1;HAL5;TRK1;KKQ8;PGM2;SNQ2	Upregulated
nuclear-transcribed mRNA catabolic process, exonucleolytic, 3'-5' (GO:0034427)	2.74e-06	1.34e-05	0.161175	0.879386	-0.956866	12.254	RRP4;SKI3;DIS3;RRP43;RRP40;CSL4;SKI2;NAM7;RRP45	Upregulated
monocarboxylic acid catabolic process (GO:0072329)	5.95e-06	2.63e-05	0.260945	0.926668	-1.01686	12.2356	UGA2;DLD1;UGA1;DLD2;GOR1;SWI6;SWI4;FDC1;ASP1;PAH1	Upregulated
macromolecule catabolic process (GO:0009057)	3.64e-05	0.00013411	0.150741	0.879386	-1.1967	12.2317	NTA1;LAP2;NMA111;CIC1;MCX1;RKR1	Upregulated
RNA metabolic process (GO:0016070)	5.54e-07	3.35e-06	0.533577	0.999856	-0.845113	12.1742	POL2;POL32;RFC5;POL1;RFC3;RFC1;DIS3;RFC2;POL30;SKI2;CDC9;SSD1;MTR4;PRI1;MRPL3;NUC1;RNT1	Upregulated
mitochondrion inheritance (GO:0000001)	1.16e-06	6.43e-06	0.266863	0.931249	-0.885854	12.1053	ACT1;PHB1;BUL1;MDM20;ARP3;MYO2;OLE1;ARP2;PHB2;ARC35;DNM1;NUM1	Upregulated
heme biosynthetic process (GO:0006783)	1.77e-05	7.09e-05	0.21457	0.890701	-1.10247	12.0601	HEM1;HEM3;HEM15;HEM2;HEM14;COX15;HEM13;HEM12	Upregulated
positive regulation of hydrolase activity (GO:0051345)	1.28e-05	5.33e-05	0.394766	0.982044	-1.06763	12.0315	MSH6;SEC13;SWA2;MSH2;SAC7;POL30;OSH3;SQS1;IRA1;KES1;BUD3	Upregulated
protein import into mitochondrial matrix (GO:0030150)	5.95e-06	2.63e-05	0.260945	0.926668	-0.999053	12.0213	TIM50;PAM17;TIM21;SSC1;YME1;TOM40;MCX1;TIM23;AFG3;TOM70	Upregulated
mitochondrion distribution (GO:0048311)	1.16e-06	6.43e-06	0.266863	0.931249	-0.867053	11.8484	ACT1;PHB1;BUL1;MDM20;ARP3;MYO2;OLE1;ARP2;PHB2;ARC35;DNM1;NUM1	Upregulated
glycerophospholipid metabolic process (GO:0006650)	4.85e-06	2.25e-05	0.190893	0.879386	-0.964105	11.7975	CDS1;CSR1;PGC1;SLC1;PDR17;YPK1;SEC14;SFH5;YKR070W	Upregulated
intracellular pH reduction (GO:0051452)	4.03e-06	1.91e-05	0.295787	0.956964	-0.946868	11.7616	VMA2;VMA13;VMA5;VMA6;DBF2;VMA8;PFK2;VPH1;VPS45;VPH2;VMA1	Upregulated
negative regulation of cellular protein metabolic process (GO:0032269)	3.73e-06	1.78e-05	0.229088	0.909049	-0.941001	11.7615	PUF6;SNF1;PHB1;NOT3;NOT5;SSD1;DHH1;NPL3;PHB2;ASC1	Upregulated
vacuolar acidification (GO:0007035)	4.03e-06	1.91e-05	0.295787	0.956964	-0.945105	11.7397	VMA2;VMA13;VMA5;VMA6;DBF2;VMA8;PFK2;VPH1;VPS45;VPH2;VMA1	Upregulated
NLS-bearing protein import into nucleus (GO:0006607)	4.85e-06	2.25e-05	0.190893	0.879386	-0.959066	11.7358	NUP159;NUP145;NUP53;SRP1;KAP95;NUP57;PSE1;KAP123;KAP104	Upregulated
sphingolipid metabolic process (GO:0006665)	2.36e-06	1.19e-05	0.38753	0.982044	-0.902007	11.6856	LCB2;LCB1;SUR2;HFD1;LCB4;ELO3;LCB3;IFA38;DPL1;SCS7;FLC1;FLC2;KES1	Upregulated
regulation of DNA-dependent DNA replication initiation (GO:0030174)	3.73e-06	1.78e-05	0.229088	0.909049	-0.928454	11.6047	CTI6;BRE1;IPI3;RCO1;RIX1;SET2;EAF3;RPD3;IPI1;SIN3	Upregulated
response to unfolded protein (GO:0006986)	8.2e-06	3.57e-05	0.222755	0.909049	-0.990813	11.6034	SNF1;SSZ1;KAR2;SSB2;SSQ1;SSA2;GLC7;SSC1;LHS1	Upregulated
late endosome to vacuole transport via multivesicular body sorting pathway (GO:0032511)	6.22e-07	3.71e-06	0.40917	0.982044	-0.811364	11.595	PKH2;RSP5;PKH1;SEC28;VTA1;SEC27;VPS9;MUK1;ELO3;BRO1;GGA2;GGA1;YPT52;VPS4;VPS21	Upregulated
mRNA modification (GO:0016556)	3.64e-05	0.00013411	0.150741	0.879386	-1.13001	11.55	CBF5;PUS4;DEG1;PUS1;MUM2;PUS7	Upregulated
'de novo' posttranslational protein folding (GO:0051084)	1.01e-05	4.25e-05	0.180848	0.879386	-1.00363	11.5457	SSZ1;HSP104;KAR2;SSB2;SSQ1;SSA2;SSC1;LHS1	Upregulated
regulation of cellular macromolecule biosynthetic process (GO:2000112)	5.61e-07	3.36e-06	0.600004	0.999856	-0.799407	11.506	HMT1;NUP133;MLP2;CTR9;NPL6;ARP4;PPH21;STH1;TPD3;PUF6;RSC8;NUP53;RSC30;NUP84;SET2;RSC3;CHS5;SNT1	Upregulated
negative regulation of DNA recombination (GO:0045910)	1.77e-05	7.09e-05	0.21457	0.890701	-1.05119	11.4992	MSH6;SIR2;MSH2;PAP2;SET2;PAF1;RPD3;CDC73	Upregulated
establishment of protein localization to membrane (GO:0090150)	1.14e-06	6.34e-06	0.326907	0.956964	-0.830159	11.3629	CUE1;PDR17;SEC14;SFH5;SRP1;ARL1;KAP95;SEC18;MRS6;CSR1;AST1;VPS74;GCS1	Upregulated
regulation of nucleic acid-templated transcription (GO:1903506)	1.19e-06	6.57e-06	0.466238	0.999856	-0.831384	11.3403	HMT1;NUP133;MLP2;CTR9;NPL6;ARP4;STH1;RSC8;NUP53;RSC30;NUP84;SET2;RSC3;CHS5;SNT1	Upregulated
mitochondrial protein processing (GO:0034982)	3.64e-05	0.00013411	0.150741	0.879386	-1.10377	11.2819	MAS2;MAS1;IMP2;QCR2;YTA12;AFG3	Upregulated
lysine biosynthetic process (GO:0009085)	3.64e-05	0.00013411	0.150741	0.879386	-1.09766	11.2195	LYS9;LYS1;HOM3;LYS21;LYS4;LYS12	Upregulated
ribophagy (GO:0034517)	5.37e-05	0.000187879	0.127219	0.879386	-1.13931	11.2014	RSP5;PRO1;CDC48;UBP3;DOA1	Upregulated
regulation of translational initiation (GO:0006446)	4.85e-06	2.25e-05	0.190893	0.879386	-0.912548	11.1666	GCN3;GCN2;TIF5;PAB1;GCD1;GCD2;PAT1;GCD7;GCD6	Upregulated
glutathione metabolic process (GO:0006749)	3.73e-06	1.78e-05	0.229088	0.909049	-0.892834	11.1595	GLR1;GLO1;GSH2;TEF4;DUG1;GTT1;DUG2;YCF1;CAM1;OXP1	Upregulated
cellular glucose homeostasis (GO:0001678)	5.37e-05	0.000187879	0.127219	0.879386	-1.12812	11.0914	EMI2;HXK1;HXK2;GLK1;ROD1	Upregulated
fungal-type cell wall beta-glucan biosynthetic process (GO:0070880)	3.64e-05	0.00013411	0.150741	0.879386	-1.0801	11.04	KRE5;KAR2;CWH41;GAS1;GAS3;ROT2	Upregulated
chaperone mediated protein folding requiring cofactor (GO:0051085)	1.01e-05	4.25e-05	0.180848	0.879386	-0.955737	10.9947	SSZ1;HSP104;KAR2;SSB2;SSQ1;SSA2;SSC1;LHS1	Upregulated
retrograde transport, endosome to Golgi (GO:0042147)	2e-06	1.02e-05	0.443225	0.999856	-0.829671	10.8858	VPS29;RIC1;TDA3;FAB1;YPT31;YPT6;SNX4;YPT7;VPS5;VPS53;VPS30;PEP8;YPT1;VPS17	Upregulated
vesicle fusion with Golgi apparatus (GO:0048280)	3.64e-05	0.00013411	0.150741	0.879386	-1.05702	10.8041	SEC22;SED5;HRR25;SEC17;SLY1;SEC18	Upregulated
Golgi vesicle budding (GO:0048194)	5.37e-05	0.000187879	0.127219	0.879386	-1.09884	10.8036	SEC13;SEC14;VPS74;YPT1;SEC31	Upregulated
bipolar cellular bud site selection (GO:0007121)	1.77e-05	7.09e-05	0.21457	0.890701	-0.986382	10.7902	PEA2;MYO3;VRP1;MYO5;RSR1;END3;BUD6;SLA2	Upregulated
mitotic nuclear division (GO:0140014)	1.62e-06	8.43e-06	0.494569	0.999856	-0.807719	10.7674	HIR1;SRC1;SMC4;SMC1;KAP104;SMC2;CDC10;TUB4;SHS1;TUB3;TUB2;TUB1;CDC28;MCK1;BCP1	Upregulated
exonucleolytic nuclear-transcribed mRNA catabolic process involved in deadenylation-dependent decay (GO:0043928)	4.85e-06	2.25e-05	0.190893	0.879386	-0.878002	10.7438	RRP4;SKI3;DIS3;RRP43;RRP40;CSL4;SKI2;NAM7;RRP45	Upregulated
phospholipid metabolic process (GO:0006644)	7.75e-06	3.41e-05	0.423204	0.982044	-0.912239	10.7346	SCS7;PDR17;URA8;PDR16;URA7;YPK1;GPT2;SCS2;OPI1;TGL4;ERG9;PAH1	Upregulated
purine nucleobase metabolic process (GO:0006144)	2e-05	7.84e-05	0.167893	0.879386	-0.990887	10.7193	MTD1;HPT1;SER1;ADO1;ADE2;MIS1;ADE3	Upregulated
peptidyl-threonine modification (GO:0018210)	3.64e-05	0.00013411	0.150741	0.879386	-1.04816	10.7134	PKH1;DUN1;CKA2;CKA1;CKB2;CDC28	Upregulated
RNA biosynthetic process (GO:0032774)	1.01e-05	4.25e-05	0.180848	0.879386	-0.928561	10.6821	SEN1;ISW1;SET2;SUP45;CTR9;GRS1;PAF1;PRI1	Upregulated
protein O-linked mannosylation (GO:0035269)	3.64e-05	0.00013411	0.150741	0.879386	-1.04432	10.6742	DPM1;OST3;PMT4;PMT6;PMT2;PMT1	Upregulated
protein mannosylation (GO:0035268)	3.64e-05	0.00013411	0.150741	0.879386	-1.0354	10.583	DPM1;OST3;PMT4;PMT6;PMT2;PMT1	Upregulated
protein ubiquitination (GO:0016567)	3.71e-06	1.78e-05	0.852031	0.999856	-0.845844	10.5779	RSP5;RFA1;BRE1;RFA2;MOT2;NOT3;BUL2;NOT5;UFD4;BUL1;MPE1;UBR1;CDC34;TOM1;UFD2;NAM7;UBA1;RAD18;RKR1;PEP5	Upregulated
mitotic sister chromatid segregation (GO:0000070)	1.44e-06	7.61e-06	0.739332	0.999856	-0.781368	10.5102	CTF4;POL2;HIR1;POL30;CTF18;SRC1;SMC3;SMC4;SMC1;SMC2;NPA3;PDS5;TUB4;TUB3;TUB2;MRC1;TUB1;MCK1;TOP1	Upregulated
cellular cation homeostasis (GO:0030003)	8.2e-06	3.57e-05	0.222755	0.909049	-0.890354	10.4269	YLH47;PDR5;YVC1;HAL5;TRK1;KKQ8;MDM38;PGM2;SNQ2	Upregulated
regulation of protein localization to nucleus (GO:1900180)	3.64e-05	0.00013411	0.150741	0.879386	-1.00439	10.2661	CET1;SLT2;CDC55;CDC48;UFD1;NPL4	Upregulated
cellular response to unfolded protein (GO:0034620)	2e-05	7.84e-05	0.167893	0.879386	-0.946227	10.2361	SSZ1;KAR2;SSB2;SSQ1;SSA2;SSC1;LHS1	Upregulated
regulation of cell wall organization or biogenesis (GO:1903338)	8.2e-06	3.57e-05	0.222755	0.909049	-0.873231	10.2264	SLT2;SAC7;SMI1;YPK1;YPK2;SSD1;PKC1;RHO1;RNT1	Upregulated
regulation of telomerase activity (GO:0051972)	0.000133958	0.00042793	0.168624	0.879386	-1.14371	10.1996	RIX7;CDC48;UFD4;UFD1;NPL4	Upregulated
mitochondrial fission (GO:0000266)	3.64e-05	0.00013411	0.150741	0.879386	-0.990194	10.121	VPS1;MDV1;RPN11;SAR1;DNM1;NUM1	Upregulated
U5 snRNA 3'-end processing (GO:0034476)	9.92e-06	4.21e-05	0.135085	0.879386	-0.860562	9.91436	RRP6;RRP43;REX2;RRP45;MTR4;RNH70;RNT1	Upregulated
transcription from RNA polymerase I promoter (GO:0006360)	3.34e-06	1.62e-05	0.418279	0.982044	-0.784332	9.89085	RPA135;ISW1;TFB1;CTR9;RPC40;RPA43;SPT15;CHD1;CDC73;RPA190;RPB5;PAF1;MOT1	Upregulated
ribosomal small subunit export from nucleus (GO:0000056)	6.53e-05	0.000224289	0.242266	0.909573	-1.0231	9.85894	NUP159;NUP82;RPS3;CRM1;MEX67;ARB1;NOP9	Upregulated
regulation of actin cytoskeleton organization (GO:0032956)	2e-05	7.84e-05	0.167893	0.879386	-0.906302	9.80423	CDC42;RSP5;SAC7;MDM20;RHO3;RHO1;RHO2	Upregulated
phosphate-containing compound metabolic process (GO:0006796)	1.56e-05	6.46e-05	0.569087	0.999856	-0.8764	9.70215	DET1;IPP1;GFA1;PHO13;THR4;YOR283W;XKS1;PGM2;PHO81;PGI1;TGL4;SAP190;PGM1	Upregulated
folic acid-containing compound metabolic process (GO:0006760)	3.64e-05	0.00013411	0.150741	0.879386	-0.944491	9.65385	MTD1;FSH2;FSH1;FSH3;FOL2;ADE3	Upregulated
nuclear pore localization (GO:0051664)	7.47e-05	0.000249834	0.189185	0.879386	-1.00953	9.59208	NUP159;SEC13;GLE2;NUP133;NUP145;NUP84	Upregulated
RNA 3'-end processing (GO:0031123)	6.03e-06	2.67e-05	0.328188	0.956964	-0.792635	9.52586	SEN1;DIS3;NRD1;RRP43;SUB2;RRP40;RTT103;CSL4;CTR9;PAF1;CDC73	Upregulated
nucleotide metabolic process (GO:0009117)	6.53e-05	0.000224289	0.242266	0.909573	-0.983298	9.47538	APA1;PRS5;PRS2;PRS1;PRS4;AMD1;PRS3	Upregulated
nuclear pore complex assembly (GO:0051292)	0.000133958	0.00042793	0.168624	0.879386	-1.0518	9.37995	RTN1;NUP157;NIC96;KAP95;YOP1	Upregulated
endoplasmic reticulum inheritance (GO:0048309)	3.74e-05	0.000136361	0.203785	0.890701	-0.917868	9.35754	SWA2;RTN1;SEC3;MYO4;SCS2;SEY1;YOP1	Upregulated
regulation of nuclear-transcribed mRNA poly(A) tail shortening (GO:0060211)	0.000493892	0.0013398	0.189064	0.879386	-1.22756	9.34564	PKH2;PKH1;PAB1;PKC1	Upregulated
DNA-dependent DNA replication maintenance of fidelity (GO:0045005)	2.1e-05	8.17e-05	0.291638	0.956964	-0.865074	9.31622	MSH6;POL2;POL3;SEN1;DUN1;MSH2;MRC1;GLC7;CCR4	Upregulated
L-serine metabolic process (GO:0006563)	0.000133958	0.00042793	0.168624	0.879386	-1.02835	9.17082	LPD1;SER2;SER1;CYS4;CHA1	Upregulated
histidine metabolic process (GO:0006547)	0.000281913	0.000811373	0.214423	0.890701	-1.11715	9.13146	HIS2;HIS5;HIS4;HIS7;HIS1	Upregulated
regulation of actin filament-based process (GO:0032970)	2e-05	7.84e-05	0.167893	0.879386	-0.840934	9.0971	CDC42;RSP5;SAC7;MDM20;RHO3;RHO1;RHO2	Upregulated
peptidyl-threonine phosphorylation (GO:0018107)	3.64e-05	0.00013411	0.150741	0.879386	-0.888069	9.07715	PKH1;DUN1;CKA2;CKA1;CKB2;CDC28	Upregulated
nuclear pore distribution (GO:0031081)	7.47e-05	0.000249834	0.189185	0.879386	-0.951412	9.0399	NUP159;SEC13;GLE2;NUP133;NUP145;NUP84	Upregulated
Golgi to vacuole transport (GO:0006896)	2.06e-05	8.01e-05	0.363239	0.956964	-0.835142	9.01264	GGA2;GGA1;SEC14;APL5;VPS53;APL6;APL4;APL2;APM3;VPS45	Upregulated
response to endoplasmic reticulum stress (GO:0034976)	3.74e-05	0.000136361	0.203785	0.890701	-0.874815	8.91862	LNP1;SLT2;RTN1;ARL1;PDI1;EUG1;YOP1	Upregulated
termination of RNA polymerase II transcription, exosome-dependent (GO:0030847)	7.47e-05	0.000249834	0.189185	0.879386	-0.937259	8.90543	PTA1;NRD1;GLC7;PTI1;RAT1;RNT1	Upregulated
establishment of protein localization to vacuole (GO:0072666)	2.84e-06	1.38e-05	0.791024	0.999856	-0.695727	8.88661	RSP5;APL5;APL6;ARL1;VPS9;APM3;BRO1;GGA2;LOA1;VPS1;GGA1;SNX4;YPT52;PEP1;HSE1;VPS21;VPS13;VPS45;VPS27	Upregulated
protein localization to Golgi apparatus (GO:0034067)	2.98e-05	0.000114397	0.250437	0.925208	-0.849415	8.85307	VPS1;VPS4;VPS5;VPS74;ARL1;PEP8;VPS13;VPS27	Upregulated
mRNA 3'-end processing (GO:0031124)	6.39e-06	2.82e-05	0.479705	0.999856	-0.735879	8.80127	CTR9;PTI1;MPE1;CDC73;PTA1;SEN1;NRD1;SUB2;PAP2;RTT103;PAP1;PAF1;CFT2	Upregulated
regulation of cytoskeleton organization (GO:0051493)	2e-05	7.84e-05	0.167893	0.879386	-0.808308	8.74415	CDC42;RSP5;SAC7;MDM20;RHO3;RHO1;RHO2	Upregulated
nucleotide-excision repair (GO:0006289)	3.89e-06	1.85e-05	0.577168	0.999856	-0.699955	8.72011	POL2;POL32;RFA1;POL3;RFA2;TFB3;POL30;RPT6;TFB1;CDC9;ABF1;SEN1;SUB2;RPT4;PAF1	Upregulated
cellular response to hydrogen peroxide (GO:0070301)	7.47e-05	0.000249834	0.189185	0.879386	-0.907795	8.62547	RSC9;MSN4;MDL2;TPS1;MSN2;NCL1	Upregulated
nuclear mRNA surveillance of mRNA 3'-end processing (GO:0071031)	0.000281913	0.000811373	0.214423	0.890701	-1.04785	8.56504	RRP6;RRP4;PAP2;RRP40;MTR4	Upregulated
double-strand break repair via nonhomologous end joining (GO:0006303)	8.86e-06	3.85e-05	0.361268	0.956964	-0.734097	8.54081	POL2;RSC8;SIR2;POL1;RSC30;RSC2;CDC28;MCK1;RSC1;DOA1;SIN3	Upregulated
tetrahydrofolate biosynthetic process (GO:0046654)	0.000133958	0.00042793	0.168624	0.879386	-0.94937	8.46647	FSH2;FSH1;FSH3;MIS1;ADE3	Upregulated
leucine biosynthetic process (GO:0009098)	5.37e-05	0.000187879	0.127219	0.879386	-0.858839	8.44394	BAT1;BAT2;LEU1;LEU4;LEU9	Upregulated
7-methylguanosine RNA capping (GO:0009452)	0.000281913	0.000811373	0.214423	0.890701	-1.01858	8.32582	ABD1;CET1;CEG1;CDC28;SPT5	Upregulated
mitochondrial membrane organization (GO:0007006)	6.53e-05	0.000224289	0.242266	0.909573	-0.862579	8.31209	AIM24;TIM50;YLH47;PHB1;MDM38;SAR1;PET9	Upregulated
nuclear-transcribed mRNA catabolic process, deadenylation-independent decay (GO:0031086)	0.000281913	0.000811373	0.214423	0.890701	-1.01657	8.30935	DCS1;MOT2;NOT5;DCP1;EDC3	Upregulated
posttranscriptional tethering of RNA polymerase II gene DNA at nuclear periphery (GO:0000973)	4.79e-05	0.000170663	0.288021	0.956964	-0.830948	8.26552	RRP6;NUP116;GLE2;NUP133;MLP2;NUP145;NUP157;NUP84	Upregulated
purine nucleobase biosynthetic process (GO:0009113)	0.000133958	0.00042793	0.168624	0.879386	-0.902111	8.04501	MTD1;SER1;ADE8;MIS1;ADE3	Upregulated
SRP-dependent cotranslational protein targeting to membrane (GO:0006614)	1.34e-05	5.56e-05	0.256452	0.926668	-0.716298	8.03929	SRP72;KAR2;SSA2;SRP102;SRP54;SRP101;SRP68;SIL1;SEC63	Upregulated
plasma membrane bounded cell projection assembly (GO:0120031)	0.000281913	0.000811373	0.214423	0.890701	-0.979462	8.00604	CDC10;CDC11;CDC12;SHS1;CDC3	Upregulated
regulation of vesicle-mediated transport (GO:0060627)	4.79e-05	0.000170663	0.288021	0.956964	-0.804426	8.00171	AKL1;SEC4;GYL1;HRR25;SFH5;UBP3;TIP20;KEL1	Upregulated
pore complex assembly (GO:0046931)	0.000133958	0.00042793	0.168624	0.879386	-0.892379	7.95822	RTN1;NUP157;NIC96;KAP95;YOP1	Upregulated
ncRNA catabolic process (GO:0034661)	3.74e-05	0.000136361	0.203785	0.890701	-0.777163	7.92307	RRP4;DIS3;NRD1;RRP43;RRP40;RRP45;MTR4	Upregulated
polyphosphate metabolic process (GO:0006797)	3.74e-05	0.000136361	0.203785	0.890701	-0.776309	7.91436	VTC1;VTC2;PHO91;VTC3;VTC4;VPH1;PPX1	Upregulated
sulfur compound biosynthetic process (GO:0044272)	4.79e-05	0.000170663	0.288021	0.956964	-0.794044	7.89843	LIP5;BIO4;SAM1;SAM2;GSH2;CYS4;THI80;MET5	Upregulated
regulation of fungal-type cell wall organization (GO:0060237)	4.79e-05	0.000170663	0.288021	0.956964	-0.793383	7.89186	SLT2;SAC7;YPK1;YPK2;SSD1;PKC1;RHO1;RNT1	Upregulated
hexose catabolic process (GO:0019320)	0.000493892	0.0013398	0.189064	0.879386	-1.03635	7.8899	AMS1;GRE3;PGM2;PGM1	Upregulated
coenzyme biosynthetic process (GO:0009108)	1.08e-05	4.54e-05	0.455303	0.999856	-0.687642	7.86348	MTD1;CAB2;LIP5;SIS2;SAM1;SAM2;ECM31;PAN6;THI80;PAN5;SPE3;FOL2	Upregulated
sister chromatid segregation (GO:0000819)	8.93e-06	3.86e-05	0.586999	0.999856	-0.674257	7.8393	HIR1;RTS1;SRC1;SMC4;SMC1;SMC2;TUB4;TUB3;CDC48;RDH54;TUB2;TUB1;MCK1;TOP2	Upregulated
negative regulation of DNA-dependent DNA replication (GO:2000104)	0.000139549	0.000430322	0.23089	0.909049	-0.880673	7.81782	MSH6;DUN1;MSH2;MRC1;CCR4;CHD1	Upregulated
regulation of cellular response to amino acid starvation (GO:1903832)	7.47e-05	0.000249834	0.189185	0.879386	-0.821892	7.80925	GCN3;GCN2;GIR2;GCD1;RBG1;RBG2	Upregulated
purine ribonucleotide biosynthetic process (GO:0009152)	6.53e-05	0.000224289	0.242266	0.909573	-0.800058	7.70962	IMD2;CAB2;IMD3;APT1;SIS2;IMD4;GUA1	Upregulated
DNA-templated transcription, termination (GO:0006353)	4.22e-05	0.000153799	0.434007	0.992109	-0.75678	7.62237	SEN1;ISW1;SET2;SUP45;CTR9;ISW2;GRS1;PAF1;RPB3;CHD1	Upregulated
histidine biosynthetic process (GO:0000105)	0.000281913	0.000811373	0.214423	0.890701	-0.931596	7.61478	HIS2;HIS5;HIS4;HIS7;HIS1	Upregulated
deadenylation-dependent decapping of nuclear-transcribed mRNA (GO:0000290)	0.000108263	0.000356395	0.282782	0.956964	-0.830337	7.58176	DCS2;DCS1;NOT3;NOT5;PAT1;DHH1;DCP1	Upregulated
nuclear division (GO:0000280)	0.000493892	0.0013398	0.189064	0.879386	-0.993798	7.56597	TUB4;DBF2;TUB3;TUB1	Upregulated
cytoskeleton organization (GO:0007010)	0.000139549	0.000430322	0.23089	0.909049	-0.850423	7.54928	CDC42;SYP1;RGD2;MDM20;STH1;HSP42	Upregulated
rRNA methylation (GO:0031167)	0.000139549	0.000430322	0.23089	0.909049	-0.846284	7.51254	BMT6;EMG1;RCM1;NOP1;NOP2;DIM1	Upregulated
DNA damage checkpoint (GO:0000077)	4.79e-05	0.000170663	0.288021	0.956964	-0.75431	7.5032	GCN2;DUN1;PTC2;GLC7;TSA1;BMH2;PIN4;BMH1	Upregulated
proton transport (GO:0015992)	0.000139549	0.000430322	0.23089	0.909049	-0.836766	7.42805	YLH47;MDM38;PFK2;PMA1;PFK1;VPH1	Upregulated
mRNA splicing, via spliceosome (GO:0000398)	9.01e-06	3.89e-05	0.946561	0.999856	-0.633809	7.36332	PRP21;PRP3;PRP43;SNU71;NAB6;PRP11;PRP4;HSH155;STO1;MSL5;SNU66;NPL3;SNU114;BRR2;CUS1;DED1;WHI3;WHI4;NRD1;SUB2;SPT5;SQS1	Upregulated
regulation of signal transduction (GO:0009966)	0.000139549	0.000430322	0.23089	0.909049	-0.823048	7.30628	YAP1;SKN7;PMT4;YPT1;PMT2;PMT1	Upregulated
negative regulation of glycogen biosynthetic process (GO:0045719)	0.000493892	0.0013398	0.189064	0.879386	-0.953535	7.25945	PCL8;PSK1;PHO85;PSK2	Upregulated
protein insertion into ER membrane (GO:0045048)	0.000493892	0.0013398	0.189064	0.879386	-0.947314	7.21208	GET1;GET3;GET2;GET4	Upregulated
mitochondrial genome maintenance (GO:0000002)	3.59e-05	0.00013411	0.579677	0.999856	-0.700116	7.16474	ILV5;MDV1;YME2;KGD2;ACO1;MDJ1;MGM1;HSP78;REX2;YHM2;MGM101;GGC1	Upregulated
non-recombinational repair (GO:0000726)	1.81e-05	7.2e-05	0.428428	0.982329	-0.655161	7.15521	POL2;RSC8;SIR2;POL1;RSC30;RSC2;CDC28;MCK1;RSC1;DOA1;SIN3	Upregulated
cilium assembly (GO:0060271)	0.000281913	0.000811373	0.214423	0.890701	-0.872423	7.13111	CDC10;CDC11;CDC12;SHS1;CDC3	Upregulated
ornithine metabolic process (GO:0006591)	0.000527437	0.00139085	0.26352	0.926668	-0.943272	7.11932	ARG4;CAR2;CAR1;ARG3;ARG8	Upregulated
posttranslational protein targeting to membrane, translocation (GO:0031204)	7.47e-05	0.000249834	0.189185	0.879386	-0.747741	7.10471	SEC66;KAR2;LHS1;SEC62;SEC72;SEC63	Upregulated
regulation of adenylate cyclase activity (GO:0045761)	0.000493892	0.0013398	0.189064	0.879386	-0.93221	7.0971	BCY1;RAS2;IRA1;SRV2	Upregulated
positive regulation of translation (GO:0045727)	2.05e-05	8.01e-05	0.597551	0.999856	-0.65628	7.08401	DOM34;RLI1;TRL1;EFM2;MDM38;GCD11;TUB4;HBS1;NAM9;RPS2;CBP3;PAN5;EFT1	Upregulated
negative regulation of chromatin silencing (GO:0031936)	0.000138428	0.000430322	0.477241	0.999856	-0.796331	7.07553	CTI6;UME1;RAP1;YTA7;WTM1;RPD3;ADR1;HDA1;SIN3	Upregulated
protein export from nucleus (GO:0006611)	0.000241986	0.000719765	0.275108	0.949059	-0.847494	7.05677	NUP159;NUP82;CSE1;MSN5;CRM1;BCP1	Upregulated
Rho protein signal transduction (GO:0007266)	2.98e-05	0.000114397	0.250437	0.925208	-0.676785	7.05383	CDC42;CLA4;SLG1;BOI2;RHO5;RHO3;RHO1;RHO2	Upregulated
regulation of GTPase activity (GO:0043087)	9.91e-05	0.000329962	0.440011	0.999856	-0.764012	7.0434	RGA2;SEC13;RGA1;RGD1;SAC7;BEM3;BEM2;IRA1;BUD3	Upregulated
regulation of nucleocytoplasmic transport (GO:0046822)	0.000493892	0.0013398	0.189064	0.879386	-0.91682	6.97993	SLT2;NUP145;MSN5;CRM1	Upregulated
positive regulation of growth of unicellular organism as a thread of attached cells (GO:0070786)	0.000108263	0.000356395	0.282782	0.956964	-0.762948	6.96643	CDC42;SNF1;SNF2;GAL11;RAS2;YTA7;GAL83	Upregulated
actin nucleation (GO:0045010)	0.000527437	0.00139085	0.26352	0.926668	-0.904106	6.82372	ARC40;ARP3;BNI1;ARP2;ARC35	Upregulated
cyclic-nucleotide-mediated signaling (GO:0019935)	0.0010808	0.00262976	0.245001	0.909573	-0.99146	6.77173	SOK1;BCY1;SGT1;YVH1	Upregulated
positive regulation of cytoskeleton organization (GO:0051495)	7.43e-05	0.000249834	0.326872	0.956964	-0.704582	6.69867	PEA2;AIP1;CDC28;TWF1;BUD6;RHO5;BNI1;SRV2	Upregulated
protein retention in Golgi apparatus (GO:0045053)	0.000139549	0.000430322	0.23089	0.909049	-0.746814	6.62954	VPS1;VPS4;VPS5;PEP8;VPS13;VPS27	Upregulated
negative regulation of transcription from RNA polymerase I promoter (GO:0016479)	0.000527437	0.00139085	0.26352	0.926668	-0.875604	6.60861	UME1;SPT5;RPD3;SIN3;RIO1	Upregulated
ubiquitin-dependent catabolism of misfolded proteins by cytoplasm-associated proteasome (GO:0071629)	0.000527437	0.00139085	0.26352	0.926668	-0.862617	6.51059	CDC48;UFD1;UBR1;FES1;NPL4	Upregulated
cotranslational protein targeting to membrane (GO:0006613)	0.000133958	0.00042793	0.168624	0.879386	-0.729125	6.50233	HRI1;SRP102;SRP54;SRP101;SEC63	Upregulated
positive regulation of supramolecular fiber organization (GO:1902905)	7.43e-05	0.000249834	0.326872	0.956964	-0.679202	6.45737	NAP1;SPC34;DUO1;AIP1;TWF1;RHO5;BNI1;SRV2	Upregulated
establishment of protein localization to endoplasmic reticulum (GO:0072599)	0.000139549	0.000430322	0.23089	0.909049	-0.723676	6.42414	CUE1;SRP102;SPC2;SRP101;YDJ1;SEC53	Upregulated
tyrosine metabolic process (GO:0006570)	0.000493892	0.0013398	0.189064	0.879386	-0.842892	6.4171	TYR1;ARO8;ARO7;HFD1	Upregulated
positive regulation of actin nucleation (GO:0051127)	0.00202763	0.00459333	0.303892	0.956964	-1.03289	6.40483	MYO3;VRP1;MYO5;ABP1	Upregulated
tetrahydrofolate metabolic process (GO:0046653)	0.000281913	0.000811373	0.214423	0.890701	-0.776988	6.35103	MET12;MET13;FSH2;FSH1;FSH3	Upregulated
guanosine-containing compound biosynthetic process (GO:1901070)	0.000493892	0.0013398	0.189064	0.879386	-0.832829	6.34049	IMD2;IMD3;IMD4;GUA1	Upregulated
positive regulation of transcription from RNA polymerase II promoter in response to amino acid starvation (GO:0061412)	0.000493892	0.0013398	0.189064	0.879386	-0.831781	6.33251	SNF2;MSN4;SWI1;MSN2	Upregulated
regulation of intracellular transport (GO:0032386)	0.000527437	0.00139085	0.26352	0.926668	-0.83454	6.29868	NUP145;HRR25;UBP3;SCS2;TIP20	Upregulated
monovalent inorganic cation transport (GO:0015672)	0.000139549	0.000430322	0.23089	0.909049	-0.709093	6.29469	YLH47;MDM38;PFK2;PFK1;VPH1;ENA5	Upregulated
positive regulation of transcription from RNA polymerase II promoter in response to heat stress (GO:0061408)	7.43e-05	0.000249834	0.326872	0.956964	-0.660953	6.28387	SWI6;HSF1;SKN7;YAK1;MSN4;SWI4;SIN3;MSN2	Upregulated
protein modification by small protein conjugation (GO:0032446)	1.17e-05	4.88e-05	0.844336	0.999856	-0.552161	6.27197	RSP5;RFA1;RFA2;MOT2;NOT3;NOT5;ELP2;MPE1;UBR1;NCS2;AOS1;TOM1;UFD2;NAM7;UBA2;UBA1;NCS6;RKR1	Upregulated
7-methylguanosine mRNA capping (GO:0006370)	0.000281913	0.000811373	0.214423	0.890701	-0.767288	6.27174	ABD1;CET1;CEG1;CDC28;SPT5	Upregulated
protein deubiquitination (GO:0016579)	9.91e-05	0.000329962	0.440011	0.999856	-0.672752	6.20208	RUP1;UBP6;UBP3;UBP2;RPN11;UBP1;UBP15;SGF73;BRO1	Upregulated
organelle disassembly (GO:1903008)	7.43e-05	0.000249834	0.326872	0.956964	-0.648948	6.16973	DOM34;HSP104;RLI1;RTS1;HBS1;VPS21;YPT1;CDC3	Upregulated
regulation of chromatin organization (GO:1902275)	0.000281913	0.000811373	0.214423	0.890701	-0.753647	6.16024	HIR1;ISW1;SET2;PAF1;CHD1	Upregulated
nuclear-transcribed mRNA catabolic process, exonucleolytic (GO:0000291)	0.000108263	0.000356395	0.282782	0.956964	-0.674511	6.15892	RRP4;SKI3;RRP43;RRP40;CSL4;SKI2;RRP45	Upregulated
cellular macromolecular complex assembly (GO:0034622)	5.89e-05	0.000205183	0.469279	0.999856	-0.632291	6.15794	VPS1;VOA1;RVS161;OST3;SGT1;YTA12;VPH1;RVS167;SGF73;AFG3	Upregulated
positive regulation of cellular component organization (GO:0051130)	0.000527437	0.00139085	0.26352	0.926668	-0.814854	6.15009	RSP5;FPK1;FKS1;SLG1;RHO1	Upregulated
negative regulation of DNA biosynthetic process (GO:2000279)	0.000139549	0.000430322	0.23089	0.909049	-0.684881	6.07975	SIR2;CDC48;UFD4;PNC1;UFD1;NPL4	Upregulated
acetyl-CoA biosynthetic process (GO:0006085)	0.0010808	0.00262976	0.245001	0.909573	-0.88861	6.06926	LAT1;PDA1;PDB1;ACS2	Upregulated
selective autophagy (GO:0061912)	0.000171623	0.000521775	0.324755	0.956964	-0.696973	6.0429	RSP5;PRO1;CDC48;UBP3;VPS21;DOA1;YPT1	Upregulated
protein autophosphorylation (GO:0046777)	4.79e-05	0.000170663	0.365027	0.956964	-0.60522	6.01988	FPK1;GCN2;KIN2;KIN1;YPK1;HRR25;GIN4;COQ8;RIO1	Upregulated
sterol transport (GO:0015918)	5.89e-05	0.000205183	0.469279	0.999856	-0.617166	6.01064	DET1;CLA4;OSH7;OSH6;PDR12;OSH3;SNQ2;SWH1;KES1;OSH2	Upregulated
protein modification by small protein removal (GO:0070646)	0.000138428	0.000430322	0.477241	0.999856	-0.675694	6.00365	RUP1;RPN5;UBP6;UBP3;UBP2;RPN11;UBP1;UBP15;BRO1	Upregulated
protein processing involved in protein targeting to mitochondrion (GO:0006627)	0.0010808	0.00262976	0.245001	0.909573	-0.872834	5.96151	MAS2;MAS1;IMP2;QCR2	Upregulated
regulation of DNA recombination (GO:0000018)	0.000111815	0.000364909	0.366535	0.956964	-0.652317	5.93521	MSH6;SIR2;PAP2;CDC28;PAF1;TOP2;TOP1;CDC73	Upregulated
vesicle budding from membrane (GO:0006900)	0.000241986	0.000719765	0.275108	0.949059	-0.71223	5.93048	VPS4;SEC14;SEC28;VPS74;BRO1;YPT1	Upregulated
organelle membrane fusion (GO:0090174)	0.000138428	0.000430322	0.477241	0.999856	-0.664039	5.90009	SEC22;NYV1;SEC4;SED5;CDC48;SEY1;YKT6;BET1;SNC1	Upregulated
tRNA aminoacylation (GO:0043039)	0.000527437	0.00139085	0.26352	0.926668	-0.780967	5.89433	ARC1;VAS1;MES1;THS1;MST1	Upregulated
RNA splicing, via transesterification reactions with bulged adenosine as nucleophile (GO:0000377)	2.34e-05	9.07e-05	0.939898	0.999856	-0.552676	5.89306	PRP21;PRP3;SNU71;NAB6;PRP4;HSH155;STO1;MSL5;SNU66;NPL3;SNU114;BRR2;CUS1;WHI3;MSS116;WHI4;NRD1;SUB2;SPT5;SQS1	Upregulated
positive regulation of receptor-mediated endocytosis (GO:0048260)	0.0010808	0.00262976	0.245001	0.909573	-0.859504	5.87046	RSP5;HRR25;ROD1;SLA2	Upregulated
Arp2/3 complex-mediated actin nucleation (GO:0034314)	0.0010808	0.00262976	0.245001	0.909573	-0.858392	5.86287	ARC40;ARP3;ARP2;ARC35	Upregulated
regulation of antisense RNA transcription (GO:0060194)	0.0010808	0.00262976	0.245001	0.909573	-0.854781	5.8382	RCO1;SET2;ISW2;EAF3	Upregulated
chromatin silencing at rDNA (GO:0000183)	0.000233838	0.000699661	0.446541	0.999856	-0.693246	5.79615	SIR2;TOF2;ISW2;PAF1;PNC1;NPT1;TOP1;FUN30	Upregulated
cilium organization (GO:0044782)	0.000527437	0.00139085	0.26352	0.926668	-0.765467	5.77735	CDC10;CDC11;CDC12;SHS1;CDC3	Upregulated
cellular modified amino acid biosynthetic process (GO:0042398)	0.000108263	0.000356395	0.282782	0.956964	-0.631344	5.76477	MTD1;ECM31;GSH2;PAN6;PAN5;SPE3;FOL2	Upregulated
membrane lipid metabolic process (GO:0006643)	0.000281913	0.000811373	0.214423	0.890701	-0.69968	5.71912	DPL1;SUR2;HFD1;LCB4;KES1	Upregulated
response to salt stress (GO:0009651)	0.000138428	0.000430322	0.477241	0.999856	-0.640707	5.69278	MET22;WHI2;ALD6;RIM11;SIS2;MYO5;NST1;PSR2;MCK1	Upregulated
positive regulation of Arp2/3 complex-mediated actin nucleation (GO:2000601)	0.00202763	0.00459333	0.303892	0.956964	-0.904688	5.60987	MYO3;VRP1;MYO5;ABP1	Upregulated
indolalkylamine biosynthetic process (GO:0046219)	0.0010808	0.00262976	0.245001	0.909573	-0.815266	5.56831	TRP5;TRP4;TRP3;TRP2	Upregulated
piecemeal microautophagy of nucleus (GO:0034727)	6.14e-05	0.000213357	0.637197	0.999856	-0.571534	5.54258	SNX4;YPT7;CDC48;OSH7;OSH6;VPS30;VAC8;OSH3;SWH1;KES1;NVJ1;OSH2	Upregulated
homocysteine metabolic process (GO:0050667)	0.000527437	0.00139085	0.26352	0.926668	-0.724629	5.46912	SAM4;YHR112C;CYS4;CYS3;LAP3	Upregulated
deadenylation-independent decapping of nuclear-transcribed mRNA (GO:0031087)	0.00202763	0.00459333	0.303892	0.956964	-0.880851	5.46206	MOT2;NOT5;DCP1;EDC3	Upregulated
oxoacid metabolic process (GO:0043436)	0.000139549	0.000430322	0.23089	0.909049	-0.612915	5.44091	VTC1;VTC2;PHO91;VTC3;VTC4;VPH1	Upregulated
regulation of cellular protein localization (GO:1903827)	0.000171623	0.000521775	0.324755	0.956964	-0.625607	5.42414	CDC42;GAL11;HRR25;HSF1;CDC28;BNI1;RHO1	Upregulated
peroxisome organization (GO:0007031)	4.69e-05	0.000170466	0.528024	0.999856	-0.540557	5.38763	VPS1;RTN1;MDV1;RPN11;MGM1;MYO2;ADR1;DNM1;PEX25;YOP1;SNF4	Upregulated
vacuole inheritance (GO:0000011)	4.79e-05	0.000170663	0.288021	0.956964	-0.536411	5.33574	ACT1;CLA4;YPT7;VAC8;VPS9;VPS21;MYO2;VPS45	Upregulated
cellular bud site selection (GO:0000282)	3.47e-05	0.000133062	0.651775	0.999856	-0.513609	5.27418	PEA2;RSR1;SLA2;CDC24;MYO3;BCH1;VRP1;MYO5;CHS5;END3;BUD6;BUD4;BUD3	Upregulated
nucleotide-sugar biosynthetic process (GO:0009226)	0.000493892	0.0013398	0.189064	0.879386	-0.692533	5.27239	PCM1;PMI40;PSA1;QRI1	Upregulated
homoserine metabolic process (GO:0009092)	0.000241986	0.000719765	0.275108	0.949059	-0.62903	5.2377	HOM6;YHR112C;CYS4;CYS3;HOM3;HOM2	Upregulated
steroid metabolic process (GO:0008202)	0.000615548	0.00158449	0.367966	0.956964	-0.704195	5.20611	VPS4;OSH7;OSH6;ERG11;ERG12;ERG5	Upregulated
peroxisome fission (GO:0016559)	0.000281913	0.000811373	0.214423	0.890701	-0.625524	5.11298	VPS1;MDV1;RPN11;MGM1;DNM1	Upregulated
alpha-amino acid metabolic process (GO:1901605)	0.000527437	0.00139085	0.26352	0.926668	-0.674864	5.09352	CAR2;SAM4;TYR1;ARG1;RMT2	Upregulated
pre-replicative complex assembly involved in nuclear cell cycle DNA replication (GO:0006267)	0.000111815	0.000364909	0.366535	0.956964	-0.555567	5.05492	IPI3;ORC1;RIX1;MCM3;MCM4;BMH2;MCM6;IPI1	Upregulated
cytokinesis, site selection (GO:0007105)	0.000527437	0.00139085	0.26352	0.926668	-0.669319	5.05167	CDC11;SHS1;RTS1;PKC1;RHO1	Upregulated
protein targeting to vacuole (GO:0006623)	2.83e-05	0.000109308	0.763314	0.999856	-0.482137	5.0495	APL5;APL6;ARL1;VPS9;APM3;LOA1;VPS1;SNX4;YPT52;PEP1;HSE1;VPS21;VPS13;VPS45;VPS27	Upregulated
regulation of intracellular signal transduction (GO:1902531)	0.00800159	0.0155804	0.356077	0.956964	-1.04267	5.03412	CLA4;TIP20;CDC60	Upregulated
regulation of Rho protein signal transduction (GO:0035023)	0.00202763	0.00459333	0.303892	0.956964	-0.808829	5.01546	SAC7;BEM3;BEM2;PXL1	Upregulated
nuclear DNA replication (GO:0033260)	0.000163689	0.000500677	0.406566	0.982044	-0.575285	5.01507	IPI3;ORC1;RIX1;MCM3;MCM4;BMH2;MCM6;IPI1	Upregulated
box C/D snoRNP assembly (GO:0000492)	0.000281913	0.000811373	0.214423	0.890701	-0.613162	5.01194	HSP82;RVB2;RVB1;PIH1;HSC82	Upregulated
cellular amino acid catabolic process (GO:0009063)	0.00202763	0.00459333	0.303892	0.956964	-0.807771	5.0089	BAT1;BAT2;UGA2;UGA1	Upregulated
glucose homeostasis (GO:0042593)	0.000493892	0.0013398	0.189064	0.879386	-0.656163	4.9955	EMI2;HXK1;HXK2;GLK1	Upregulated
cellular macromolecule catabolic process (GO:0044265)	0.000233838	0.000699661	0.446541	0.999856	-0.596465	4.98698	NUC1;ASK10;DIS3;SKI2;CDC28;MCK1;SSD1;MTR4	Upregulated
asparagine metabolic process (GO:0006528)	0.000395454	0.00111688	0.321057	0.956964	-0.628296	4.923	SWI6;ASN2;SWI4;ASN1;ASP1;NIT3	Upregulated
protein targeting to ER (GO:0045047)	4.79e-05	0.000170663	0.365027	0.956964	-0.493963	4.91326	SRP102;SRP54;SPC2;SRP101;YDJ1;GET3;SEC53;GET4;SEC63	Upregulated
base-excision repair (GO:0006284)	0.000386758	0.0011068	0.410772	0.982044	-0.62421	4.90486	POL2;POL32;POL3;PAP2;CDC9;APN1;STH1	Upregulated
folic acid metabolic process (GO:0046655)	0.000493892	0.0013398	0.189064	0.879386	-0.644009	4.90296	FSH2;FSH1;FSH3;MIS1	Upregulated
peptidyl-lysine methylation (GO:0018022)	0.000395454	0.00111688	0.321057	0.956964	-0.624863	4.8961	EFM1;SET5;EFM2;EFM4;EFM5;RKM1	Upregulated
regulation of histone H2B ubiquitination (GO:2001166)	0.0010808	0.00262976	0.245001	0.909573	-0.71562	4.88773	CDC48;CTR9;PAF1;CDC73	Upregulated
vacuole organization (GO:0007033)	0.000109493	0.000359659	0.538295	0.999856	-0.535778	4.88611	ACT1;CLA4;YPT7;GVP36;VAC8;VPS9;VPS21;MYO2;VPS45;NEO1	Upregulated
negative regulation of telomerase activity (GO:0051974)	0.000493892	0.0013398	0.189064	0.879386	-0.637501	4.85342	CDC48;UFD4;UFD1;NPL4	Upregulated
histone deacetylation (GO:0016575)	0.000163689	0.000500677	0.406566	0.982044	-0.553959	4.82916	RCO1;HOS3;SET2;EAF3;RPD3;HDA1;SIN3;SNT1	Upregulated
transcription-dependent tethering of RNA polymerase II gene DNA at nuclear periphery (GO:0000972)	0.000233838	0.000699661	0.446541	0.999856	-0.572811	4.7892	RRP6;NUP116;GLE2;NUP133;MLP2;NUP145;NUP157;NUP84	Upregulated
nucleobase-containing compound catabolic process (GO:0034655)	0.000171623	0.000521775	0.324755	0.956964	-0.545033	4.72555	APA1;NUC1;DIS3;SKI2;SSD1;MTR4;APA2	Upregulated
traversing start control point of mitotic cell cycle (GO:0007089)	0.000395454	0.00111688	0.321057	0.956964	-0.599936	4.70079	WHI3;XRN1;CDC25;GID8;CYS4;CCR4	Upregulated
protein methylation (GO:0006479)	0.000615548	0.00158449	0.367966	0.956964	-0.635106	4.69534	SFM1;HMT1;EFM2;SET2;TAE1;RMT2	Upregulated
aspartate family amino acid catabolic process (GO:0009068)	0.000395454	0.00111688	0.321057	0.956964	-0.594195	4.6558	SWI6;SWI4;CHA1;GLY1;ILV1;ASP1	Upregulated
pyrimidine-containing compound biosynthetic process (GO:0072528)	0.000139549	0.000430322	0.23089	0.909049	-0.520882	4.62392	URA8;URA7;URA5;URA4;THI80;FUR1	Upregulated
cysteine biosynthetic process (GO:0019344)	0.0010808	0.00262976	0.245001	0.909573	-0.675024	4.61045	YHR112C;CYS4;CYS3;MET17	Upregulated
regulation of phospholipid metabolic process (GO:1903725)	0.000904688	0.00228593	0.314783	0.956964	-0.656611	4.60148	GIS1;TCB3;VPS74;SCS2;TCB1	Upregulated
positive regulation of transcription from RNA polymerase II promoter in response to glucose starvation (GO:0061406)	0.000493892	0.0013398	0.189064	0.879386	-0.598152	4.55385	BCY1;YAK1;MSN4;MSN2	Upregulated
metal ion homeostasis (GO:0055065)	0.00202763	0.00459333	0.303892	0.956964	-0.731593	4.53653	YLH47;FLC2;MDM38;VHC1	Upregulated
regulation of mRNA stability (GO:0043488)	0.000395454	0.00111688	0.321057	0.956964	-0.5729	4.48894	PUB1;WHI3;WHI4;XRN1;HEK2;MGA2	Upregulated
threonine biosynthetic process (GO:0009088)	0.000493892	0.0013398	0.189064	0.879386	-0.583472	4.44208	HOM6;THR4;HOM3;HOM2	Upregulated
regulation of protein localization (GO:0032880)	0.000256352	0.000760999	0.549672	0.999856	-0.53618	4.43365	RSP5;PEA2;DBF2;HRR25;RAS2;BUD6;BNI1;PHO85;RHO1	Upregulated
negative regulation of phospholipid biosynthetic process (GO:0071072)	0.000281913	0.000811373	0.214423	0.890701	-0.53775	4.39552	CSR1;PDR17;SEC14;GTS1;OPI1	Upregulated
cysteine metabolic process (GO:0006534)	0.00342421	0.00721614	0.364011	0.956964	-0.771244	4.37827	YHR112C;CYS4;CYS3;MET17	Upregulated
regulation of exocytosis (GO:0017157)	0.000281913	0.000811373	0.214423	0.890701	-0.533366	4.35969	CDC42;SEC4;GYL1;SFH5;RHO3	Upregulated
posttranslational protein targeting to endoplasmic reticulum membrane (GO:0006620)	7.43e-05	0.000249834	0.326872	0.956964	-0.456939	4.34426	SEC66;KAR2;LHS1;GET3;SEC62;SEC72;GET4;SEC63	Upregulated
regulation of Arp2/3 complex-mediated actin nucleation (GO:0034315)	0.00220698	0.00494038	0.419509	0.982044	-0.704757	4.31039	MYO3;VRP1;MYO5;ABP1;SLA1	Upregulated
cellular metal ion homeostasis (GO:0006875)	0.000138428	0.000430322	0.477241	0.999856	-0.483383	4.29493	VMA2;YLH47;PPZ1;TRK1;MDM38;PGM2;PMR1;PMC1;SPF1	Upregulated
negative regulation of glycogen metabolic process (GO:0070874)	0.0010808	0.00262976	0.245001	0.909573	-0.627125	4.2833	PCL8;PSK1;PHO85;PSK2	Upregulated
tryptophan biosynthetic process (GO:0000162)	0.0010808	0.00262976	0.245001	0.909573	-0.623403	4.25788	TRP5;TRP4;TRP3;TRP2	Upregulated
regulation of transcription involved in G1/S transition of mitotic cell cycle (GO:0000083)	0.000146144	0.00044883	0.571589	0.999856	-0.47578	4.20157	MSA2;HOS3;SWI6;CTR9;SWI4;PAF1;SPT6;RPD3;ASP1;PHO85	Upregulated
membrane lipid biosynthetic process (GO:0046467)	0.000233838	0.000699661	0.446541	0.999856	-0.500827	4.18735	FLC1;LCB2;FLC2;LCB1;SUR2;ELO3;LCB3;IFA38	Upregulated
nuclear-transcribed mRNA catabolic process, non-stop decay (GO:0070481)	0.000111815	0.000364909	0.366535	0.956964	-0.458272	4.16967	RRP4;SKI3;DIS3;RRP43;RRP40;CSL4;SKI2;RRP45	Upregulated
folic acid-containing compound biosynthetic process (GO:0009396)	0.000139549	0.000430322	0.23089	0.909049	-0.469241	4.1655	MTD1;FSH2;FSH1;FSH3;FOL2;MIS1	Upregulated
RNA catabolic process (GO:0006401)	0.000233838	0.000699661	0.446541	0.999856	-0.489735	4.09461	POL32;NUC1;POL3;DIS3;SKI2;SSD1;MTR4;YPT1	Upregulated
G1/S transition of mitotic cell cycle (GO:0000082)	0.000180657	0.000548138	0.677952	0.999856	-0.47446	4.08933	CDC34;MSA2;SHS1;HOS3;CTR9;CDC28;PAF1;PPH21;RPD3;PHO85;SAP190	Upregulated
protein retention in ER lumen (GO:0006621)	0.000904688	0.00228593	0.314783	0.956964	-0.579111	4.05836	ERP4;EPS1;EMP24;ERP1;ERP2	Upregulated
positive regulation of response to nutrient levels (GO:0032109)	0.000395454	0.00111688	0.321057	0.956964	-0.516523	4.04721	GCN3;SNF1;GCN2;GIR2;RBG1;RBG2	Upregulated
alpha-amino acid catabolic process (GO:1901606)	0.00342421	0.00721614	0.364011	0.956964	-0.709133	4.02567	SAH1;LPD1;PDC1;LAP3	Upregulated
histone H4 acetylation (GO:0043967)	0.00800159	0.0155804	0.356077	0.956964	-0.822528	3.97126	HAT1;EAF3;ELP4	Upregulated
lagging strand elongation (GO:0006273)	0.00220698	0.00494038	0.419509	0.982044	-0.644906	3.94432	POL32;POL1;POL30;CDC9;PRI1	Upregulated
transfer RNA gene-mediated silencing (GO:0061587)	0.000919919	0.00230897	0.415103	0.982044	-0.559324	3.91036	RSC9;RCO1;GLC7;RPD3;STH1;SIN3	Upregulated
regulation of protein complex disassembly (GO:0043244)	0.00202763	0.00459333	0.303892	0.956964	-0.624354	3.87155	ECM32;NAM7;TPA1;CAM1	Upregulated
regulation of proteolysis (GO:0030162)	0.00145122	0.00343159	0.367115	0.956964	-0.586277	3.83153	PHB1;NUP53;KAP95;PSE1;PHB2	Upregulated
autophagy of nucleus (GO:0044804)	0.00010117	0.000335974	0.690342	0.999856	-0.414409	3.81203	SNX4;YPT7;CDC48;OSH7;OSH6;VPS30;VAC8;OSH3;SWH1;KES1;NVJ1;OSH2	Upregulated
'de novo' pyrimidine nucleobase biosynthetic process (GO:0006207)	0.000281913	0.000811373	0.214423	0.890701	-0.46607	3.80961	CPA2;URA5;URA4;URA2;URA1	Upregulated
small nucleolar ribonucleoprotein complex assembly (GO:0000491)	0.000904688	0.00228593	0.314783	0.956964	-0.538803	3.77589	HSP82;RVB2;RVB1;PIH1;HSC82	Upregulated
beta-glucan biosynthetic process (GO:0051274)	0.000395454	0.00111688	0.321057	0.956964	-0.481084	3.76952	FKS1;KRE5;UGP1;KAR2;CWH41;ROT2	Upregulated
regulation of mating type switching (GO:0031494)	0.00800159	0.0155804	0.356077	0.956964	-0.777778	3.7552	SNF2;SWI3;SWI1	Upregulated
serine family amino acid metabolic process (GO:0009069)	0.000527437	0.00139085	0.26352	0.926668	-0.497185	3.75249	SER33;SER3;GCV1;SER1;SHM1	Upregulated
very long-chain fatty acid metabolic process (GO:0000038)	0.00202763	0.00459333	0.303892	0.956964	-0.601994	3.7329	TSC13;FAT1;ELO3;IFA38	Upregulated
regulation of histone H2B conserved C-terminal lysine ubiquitination (GO:2001173)	0.00800159	0.0155804	0.356077	0.956964	-0.772075	3.72767	CTR9;PAF1;CDC73	Upregulated
cellular respiration (GO:0045333)	6.57e-05	0.000225084	0.832121	0.999856	-0.384145	3.69952	MDH1;IPP1;ETR1;MAS1;ADE16;COR1;DLD2;DLD3;QCR2;CIR2;SDH1;SDH2;COX20;PAH1;PET9	Upregulated
cellular response to ethanol (GO:0071361)	0.00342421	0.00721614	0.364011	0.956964	-0.651025	3.69579	MSN4;UFD2;ADR1;MSN2	Upregulated
regulation of hydrolase activity (GO:0051336)	0.000527437	0.00139085	0.26352	0.926668	-0.481067	3.63085	RGA2;RGA1;RGD1;BEM3;BEM2	Upregulated
nucleotide-sugar metabolic process (GO:0009225)	0.00202763	0.00459333	0.303892	0.956964	-0.579838	3.59551	UGP1;PGM2;GFA1;PGM1	Upregulated
long-chain fatty acid metabolic process (GO:0001676)	0.000493892	0.0013398	0.189064	0.879386	-0.470848	3.58466	FAS1;FAS2;FAA3;ACC1	Upregulated
regulation of translational termination (GO:0006449)	0.000904688	0.00228593	0.314783	0.956964	-0.510033	3.57427	ECM32;EFM2;NAM7;TPA1;CAM1	Upregulated
telomere localization (GO:0034397)	0.000919919	0.00230897	0.415103	0.982044	-0.509025	3.55871	SIR2;NUP116;NUP133;MLP2;NUP145;NUP84	Upregulated
positive regulation of phosphorylation of RNA polymerase II C-terminal domain (GO:1901409)	0.00342421	0.00721614	0.364011	0.956964	-0.612842	3.47904	CTR9;PAF1;CCL1;CDC73	Upregulated
protein monoubiquitination (GO:0006513)	0.000386758	0.0011068	0.410772	0.982044	-0.437859	3.44057	RSP5;BRE1;BUL2;UFD4;BUL1;UBR1;RAD18	Upregulated
rRNA transcription (GO:0009303)	0.000447339	0.0012531	0.617786	0.999856	-0.442386	3.41177	RSC9;RPA135;TFC3;RPA190;TFC1;RPA43;MOT1;SPT15;RNT1	Upregulated
regulation of histone H3-K4 methylation (GO:0051569)	0.00800159	0.0155804	0.356077	0.956964	-0.702383	3.39119	CTR9;PAF1;SGV1	Upregulated
mitotic cytokinesis (GO:0000281)	0.000128215	0.000415734	0.715086	0.999856	-0.372329	3.33674	CDC10;CDC11;CDC12;CDC24;BCH1;SHS1;RSR1;RTS1;CHS5;PKC1;CDC3;RHO1	Upregulated
tRNA thio-modification (GO:0034227)	0.00202763	0.00459333	0.303892	0.956964	-0.535618	3.32131	NCS2;NFS1;TUM1;NCS6	Upregulated
organophosphate biosynthetic process (GO:0090407)	0.000192613	0.000583244	0.603818	0.999856	-0.386741	3.3085	PDR17;URA8;PDR16;URA7;GPT2;SCS2;OPI1;THI80;VIP1;PAH1	Upregulated
positive regulation of cellular biosynthetic process (GO:0031328)	0.000447832	0.0012531	0.524804	0.999856	-0.423832	3.2682	DOM34;RSP5;SNF1;RLI1;PDC2;HBS1;PHO85;SNF4	Upregulated
regulation of dephosphorylation (GO:0035303)	0.000527437	0.00139085	0.26352	0.926668	-0.432335	3.26304	TCB3;VPS74;SCS2;TCB1;TAP42	Upregulated
calcium ion homeostasis (GO:0055074)	0.000615548	0.00158449	0.367966	0.956964	-0.440563	3.25708	VMA2;FLC2;PGM2;PMR1;PMC1;SPF1	Upregulated
organic hydroxy compound transport (GO:0015850)	0.000555001	0.00145339	0.453736	0.999856	-0.432051	3.23889	OSH7;OSH6;OSH3;SWH1;KES1;OSH2;YBT1	Upregulated
protein localization to bud neck (GO:0097271)	0.00145122	0.00343159	0.367115	0.956964	-0.494826	3.23386	CDC11;SHS1;BCY1;RAS2;BUD4	Upregulated
maintenance of chromatin silencing at telomere (GO:0035392)	0.00800159	0.0155804	0.356077	0.956964	-0.669546	3.23265	NUP133;NUP145;NUP84	Upregulated
histone methylation (GO:0016571)	0.0010808	0.00262976	0.245001	0.909573	-0.470444	3.21316	HMT1;SET5;NOP1;SET2	Upregulated
regulation of nuclear-transcribed mRNA catabolic process, deadenylation-dependent decay (GO:1900151)	0.00145122	0.00343159	0.367115	0.956964	-0.491602	3.2128	PKH2;PKH1;PAB1;PKC1;EDC3	Upregulated
positive regulation of cellular response to amino acid starvation (GO:1903833)	0.000527437	0.00139085	0.26352	0.926668	-0.423911	3.19946	GCN3;GCN2;GIR2;RBG1;RBG2	Upregulated
regulation of macromolecule metabolic process (GO:0060255)	0.000447832	0.0012531	0.524804	0.999856	-0.41358	3.18915	HOG1;SLT2;ASF1;TCB3;VPS74;CDC28;SCS2;TCB1	Upregulated
pyrimidine ribonucleoside biosynthetic process (GO:0046132)	0.00800159	0.0155804	0.356077	0.956964	-0.65907	3.18207	URA8;URA7;URA5	Upregulated
negative regulation of meiosis I (GO:0110029)	0.00202763	0.00459333	0.303892	0.956964	-0.510337	3.16454	MSH2;SET2;RPD3;SMC2	Upregulated
fatty acid metabolic process (GO:0006631)	0.000555001	0.00145339	0.453736	0.999856	-0.415027	3.11126	TSC13;SCS7;FAT1;ELO3;FAA3;ETR1;PAH1	Upregulated
RNA import into nucleus (GO:0006404)	0.00800159	0.0155804	0.356077	0.956964	-0.638745	3.08394	SSA2;RNA1;YDJ1	Upregulated
negative regulation of cellular amide metabolic process (GO:0034249)	0.000233838	0.000699661	0.446541	0.999856	-0.366649	3.06551	PUF6;SNF1;NOT3;NOT5;SSD1;DHH1;NPL3;ASC1	Upregulated
DNA replication-independent nucleosome organization (GO:0034724)	0.00535538	0.0110095	0.423846	0.982044	-0.577968	3.02257	HIR1;ASF1;POB3;SPT16	Upregulated
protein homooligomerization (GO:0051260)	0.00800159	0.0155804	0.356077	0.956964	-0.624746	3.01634	VPS4;STE2;DNM1	Upregulated
positive regulation of GTPase activity (GO:0043547)	0.0010417	0.00259311	0.633417	0.999856	-0.433904	2.97957	MDR1;SEC13;SAC7;GYP5;GYP6;IRA1;MRS6;BUD3	Upregulated
telomere tethering at nuclear periphery (GO:0034398)	0.000919919	0.00230897	0.415103	0.982044	-0.426112	2.97904	SIR2;NUP116;NUP133;MLP2;NUP145;NUP84	Upregulated
mRNA catabolic process (GO:0006402)	0.00132808	0.00320564	0.461805	0.999856	-0.446321	2.95644	MRT4;XRN1;DIS3;PAP2;NAM7;SSD1	Upregulated
cellular bud neck septin ring organization (GO:0032186)	0.000527437	0.00139085	0.26352	0.926668	-0.390599	2.94804	CDC11;SHS1;RTS1;PKC1;RHO1	Upregulated
regulation of cellular component organization (GO:0051128)	0.000289257	0.000830926	0.7293	0.999856	-0.361422	2.94494	AKL1;SLT2;SAC7;YPK1;YPK2;GAL83;SLM1;SSD1;PKC1;RHO1;RNT1	Upregulated
cellular protein complex localization (GO:0034629)	0.00132808	0.00320564	0.461805	0.999856	-0.443374	2.93692	YPT6;SEC3;SRP1;ARL1;SEH1;JSN1	Upregulated
ethanol metabolic process (GO:0006067)	0.00321339	0.00694626	0.471081	0.999856	-0.510681	2.93152	ADH3;ADH1;ALD4;NDE1;PDC1	Upregulated
cellular response to amino acid starvation (GO:0034198)	0.00342421	0.00721614	0.364011	0.956964	-0.513725	2.91636	SNF2;MSN4;SWI1;MSN2	Upregulated
positive regulation of dephosphorylation (GO:0035306)	0.00800159	0.0155804	0.356077	0.956964	-0.603773	2.91508	GLC7;OSH3;KES1	Upregulated
phosphatidylcholine biosynthetic process (GO:0006656)	0.00220698	0.00494038	0.419509	0.982044	-0.471031	2.88089	SAH1;PSD1;CHO2;KAP95;CKI1	Upregulated
regulation of DNA-templated transcription in response to stress (GO:0043620)	0.00321339	0.00694626	0.471081	0.999856	-0.499393	2.86673	ASF1;HSF1;SKN7;SPT6;INO80	Upregulated
hydrogen peroxide metabolic process (GO:0042743)	0.00202763	0.00459333	0.303892	0.956964	-0.455249	2.82295	LPD1;AHP1;TSA1;CCP1	Upregulated
termination of RNA polymerase II transcription, poly(A)-coupled (GO:0030846)	0.00535538	0.0110095	0.423846	0.982044	-0.537238	2.80957	PTA1;GLC7;PTI1;RAT1	Upregulated
replication fork protection (GO:0048478)	0.0131922	0.0233686	0.427654	0.982044	-0.64324	2.78403	DUN1;MRC1;CCR4	Upregulated
RNA polyadenylation (GO:0043631)	0.000798333	0.00204109	0.598711	0.999856	-0.388895	2.77398	PTA1;SEN1;PAP2;PAP1;PTI1;MPE1;MTR4;CFT2	Upregulated
assembly of actomyosin apparatus involved in cytokinesis (GO:0000912)	0.0131922	0.0233686	0.427654	0.982044	-0.640247	2.77107	CDC11;SHS1;MYO1	Upregulated
response to hydrogen peroxide (GO:0042542)	0.00220698	0.00494038	0.419509	0.982044	-0.450714	2.75662	RSC9;ZWF1;MDL2;TPS1;NCL1	Upregulated
respiratory electron transport chain (GO:0022904)	0.000128215	0.000415734	0.715086	0.999856	-0.30709	2.75208	ODC2;MAS1;COR1;DLD2;DLD3;QCR2;CIR2;NDI1;CYC1;CYT1;SDH1;SDH2	Upregulated
sulfate assimilation (GO:0000103)	0.00535538	0.0110095	0.423846	0.982044	-0.522241	2.73114	MET22;MET14;MET10;MET5	Upregulated
cellular response to reactive oxygen species (GO:0034614)	0.00342421	0.00721614	0.364011	0.956964	-0.46955	2.66558	RSC9;MDL2;TPS1;NCL1	Upregulated
regulation of translational elongation (GO:0006448)	0.00342421	0.00721614	0.364011	0.956964	-0.469385	2.66464	GCN20;DHH1;EFT1;GCN1	Upregulated
regulation of transcription from RNA polymerase II promoter in response to stress (GO:0043618)	0.000447339	0.0012531	0.617786	0.999856	-0.341839	2.63633	HOG1;YAP1;ZAP1;ASF1;SEN1;HSF1;SKN7;SPT6;INO80	Upregulated
CUT catabolic process (GO:0071034)	0.000615548	0.00158449	0.367966	0.956964	-0.356227	2.63358	RRP6;RRP4;DIS3;NRD1;PAP2;RRP40	Upregulated
positive regulation of cell communication (GO:0010647)	0.000904688	0.00228593	0.314783	0.956964	-0.375597	2.63216	GCN3;GCN2;GIR2;RBG1;RBG2	Upregulated
UDP-N-acetylglucosamine metabolic process (GO:0006047)	0.0131922	0.0233686	0.427654	0.982044	-0.603068	2.61016	PCM1;GFA1;QRI1	Upregulated
pseudouridine synthesis (GO:0001522)	0.00321339	0.00694626	0.471081	0.999856	-0.449771	2.58188	CBF5;PUS4;DEG1;PUS1;PUS7	Upregulated
acetate metabolic process (GO:0006083)	0.00202763	0.00459333	0.303892	0.956964	-0.410774	2.54717	ALD5;ALD6;IAH1;ALD4	Upregulated
regulation of cell cycle process (GO:0010564)	6.28e-05	0.000217734	0.560052	0.999856	-0.26307	2.54524	HOG1;UME1;DBF2;NUP53;VRP1;MRC1;RSC3;PSE1;SFH1;KEL1;RCK2	Upregulated
glycolytic fermentation to ethanol (GO:0019655)	0.0131922	0.0233686	0.427654	0.982044	-0.581701	2.51768	ADH1;NDE1;PDC1	Upregulated
tRNA wobble position uridine thiolation (GO:0002143)	0.0131922	0.0233686	0.427654	0.982044	-0.573591	2.48258	NCS2;TUM1;NCS6	Upregulated
actomyosin contractile ring organization (GO:0044837)	0.0131922	0.0233686	0.427654	0.982044	-0.570025	2.46714	CDC11;SHS1;MYO1	Upregulated
regulation of COPII vesicle coating (GO:0003400)	0.0131922	0.0233686	0.427654	0.982044	-0.563986	2.44101	SEC12;SEC23;SAR1	Upregulated
regulation of transcription from RNA polymerase II promoter in response to arsenic-containing substance (GO:0061394)	0.00800159	0.0155804	0.356077	0.956964	-0.498607	2.40733	YAP1;MSN4;MSN2	Upregulated
cellular response to osmotic stress (GO:0071470)	0.0010417	0.00259311	0.633417	0.999856	-0.341347	2.34399	HOG1;SLT2;RIM11;FLC2;CKA2;PSR2;GRE3;MCK1	Upregulated
regulation of mating projection assembly (GO:0031383)	0.0131922	0.0233686	0.427654	0.982044	-0.536446	2.32181	CDC42;RSP5;PEA2	Upregulated
translational frameshifting (GO:0006452)	0.0131922	0.0233686	0.427654	0.982044	-0.535287	2.31679	SSZ1;SSB2;ZUO1	Upregulated
negative regulation of Ras protein signal transduction (GO:0046580)	0.000615548	0.00158449	0.367966	0.956964	-0.312416	2.30969	TOF2;SAC7;BCY1;BEM3;BEM2;IRA1	Upregulated
negative regulation of reciprocal meiotic recombination (GO:0045128)	0.0131922	0.0233686	0.427654	0.982044	-0.533432	2.30876	MSH2;SET2;RPD3	Upregulated
phosphatidylcholine metabolic process (GO:0046470)	0.00321339	0.00694626	0.471081	0.999856	-0.400959	2.30167	SAH1;PSD1;CHO2;KAP95;CKI1	Upregulated
mitochondrial electron transport, ubiquinol to cytochrome c (GO:0006122)	0.00321339	0.00694626	0.471081	0.999856	-0.398987	2.29036	MAS1;COR1;QCR2;CYC1;CYT1	Upregulated
sulfur compound catabolic process (GO:0044273)	0.00342421	0.00721614	0.364011	0.956964	-0.400521	2.27371	SAH1;DUG1;CIT1;DUG2	Upregulated
negative regulation of DNA metabolic process (GO:0051053)	0.00145122	0.00343159	0.367115	0.956964	-0.342164	2.23617	MSH6;SIR2;PAP2;PAF1;CDC73	Upregulated
cell wall chitin biosynthetic process (GO:0006038)	0.000919919	0.00230897	0.415103	0.982044	-0.31887	2.22929	PCM1;BCH1;BMH2;CHS3;BMH1;GFA1	Upregulated
protein N-linked glycosylation via asparagine (GO:0018279)	0.0131922	0.0233686	0.427654	0.982044	-0.513592	2.22289	KRE5;WBP1;OST3	Upregulated
protein import into mitochondrial intermembrane space (GO:0045041)	0.00342421	0.00721614	0.364011	0.956964	-0.387763	2.20129	HSP60;YME1;YTA12;MIC60	Upregulated
negative regulation of gene silencing (GO:0060969)	0.0198909	0.0328113	0.496149	0.999856	-0.557403	2.18362	RAP1;YTA7;ADR1	Upregulated
maturation of 5.8S rRNA (GO:0000460)	0.000555001	0.00145339	0.453736	0.999856	-0.28952	2.17039	PRP43;YTM1;DBP6;URB1;RPF2;MAK5;MTR4	Upregulated
positive regulation of transcription from RNA polymerase II promoter involved in cellular response to chemical stimulus (GO:1901522)	0.00134089	0.00323139	0.666391	0.999856	-0.327706	2.16759	YAP1;MSN4;SWI3;PLP2;SWI1;ADR1;MSN2;MGA2	Upregulated
ncRNA polyadenylation (GO:0043629)	0.0131922	0.0233686	0.427654	0.982044	-0.499326	2.16115	PAP2;PAP1;MTR4	Upregulated
positive regulation of endocytosis (GO:0045807)	0.000904688	0.00228593	0.314783	0.956964	-0.306312	2.14661	RSP5;FKS1;SLG1;SLA2;RHO1	Upregulated
positive regulation of actin filament polymerization (GO:0030838)	0.00202763	0.00459333	0.303892	0.956964	-0.345361	2.14154	ARC40;VRP1;RHO5;BNI1	Upregulated
snoRNA metabolic process (GO:0016074)	0.00342421	0.00721614	0.364011	0.956964	-0.376074	2.13493	XRN1;HAS1;NOP1;RAT1	Upregulated
fungal-type cell wall chitin biosynthetic process (GO:0034221)	0.000615548	0.00158449	0.367966	0.956964	-0.287739	2.12725	PCM1;BCH1;BMH2;CHS3;BMH1;GFA1	Upregulated
regulation of G2/M transition of mitotic cell cycle (GO:0010389)	0.0131922	0.0233686	0.427654	0.982044	-0.486957	2.10762	CDC55;CDC28;TIP20	Upregulated
phospholipid transport (GO:0015914)	0.00310792	0.00682567	0.685164	0.999856	-0.362575	2.09343	CSR1;PDR17;PDR16;DNF1;SEC14;SFH5;NEO1	Upregulated
vesicle-mediated transport to the plasma membrane (GO:0098876)	0.000447832	0.0012531	0.524804	0.999856	-0.270787	2.08807	CSR1;RSN1;ARF2;SEC3;BCH1;SEC4;CHS5;SNC1	Upregulated
eisosome assembly (GO:0070941)	0.00145122	0.00343159	0.367115	0.956964	-0.318809	2.08353	YPK1;YPK2;LSP1;PIL1;SLM1	Upregulated
positive regulation of transcription involved in G1/S transition of mitotic cell cycle (GO:0071931)	0.0111224	0.0207736	0.537934	0.999856	-0.454152	2.04314	SWI6;SWI4;SPT6;ASP1	Upregulated
tricarboxylic acid metabolic process (GO:0072350)	0.0010808	0.00262976	0.245001	0.909573	-0.297041	2.02881	ARG1;IDH1;IDH2;CIT1	Upregulated
mitotic chromosome condensation (GO:0007076)	0.0111224	0.0207736	0.537934	0.999856	-0.449702	2.02312	PDS5;TOP1;SMC4;SMC2	Upregulated
regulation of macroautophagy (GO:0016241)	0.000798333	0.00204109	0.598711	0.999856	-0.283474	2.02201	HOG1;SNF1;GCN2;XRN1;TPK1;RPD3;PHO85;GCN1	Upregulated
regulation of phosphatidylinositol dephosphorylation (GO:0060304)	0.00202763	0.00459333	0.303892	0.956964	-0.320661	1.98838	TCB3;VPS74;SCS2;TCB1	Upregulated
response to reactive oxygen species (GO:0000302)	0.00342421	0.00721614	0.364011	0.956964	-0.349477	1.98394	YAP1;ZWF1;SKN7;CCP1	Upregulated
positive regulation of pseudohyphal growth (GO:2000222)	0.0111224	0.0207736	0.537934	0.999856	-0.438393	1.97224	CDC42;SNF1;RAS2;GAL83	Upregulated
regulation of nucleotide-excision repair (GO:2000819)	0.00202763	0.00459333	0.303892	0.956964	-0.317234	1.96713	CTR9;SPT5;PAF1;CDC73	Upregulated
positive regulation of cell growth (GO:0030307)	0.00535538	0.0110095	0.423846	0.982044	-0.373708	1.95436	CDC42;SNF1;RAS2;GAL83	Upregulated
maintenance of protein localization in endoplasmic reticulum (GO:0035437)	0.00145122	0.00343159	0.367115	0.956964	-0.298618	1.95158	ERP4;EPS1;EMP24;ERP1;ERP2	Upregulated
histone exchange (GO:0043486)	0.000615548	0.00158449	0.367966	0.956964	-0.263545	1.94839	RVB2;ASF1;RVB1;TUP1;VPS72;INO80	Upregulated
regulation of chromatin silencing at telomere (GO:0031938)	0.0010417	0.00259311	0.633417	0.999856	-0.282612	1.94066	CTI6;UME1;CTR9;PAF1;WTM1;RPD3;HDA1;SIN3	Upregulated
mRNA polyadenylation (GO:0006378)	0.00142521	0.00341282	0.57699	0.999856	-0.293818	1.92552	PTA1;SEN1;PAP2;PAP1;PTI1;MPE1;CFT2	Upregulated
regulation of phospholipid biosynthetic process (GO:0071071)	0.0131922	0.0233686	0.427654	0.982044	-0.441679	1.91164	GIS1;OPI1;PHO85	Upregulated
pantothenate metabolic process (GO:0015939)	0.00342421	0.00721614	0.364011	0.956964	-0.333357	1.89243	ECM31;PAN6;PAN5;SPE3	Upregulated
phosphorylated carbohydrate dephosphorylation (GO:0046838)	0.00535538	0.0110095	0.423846	0.982044	-0.359885	1.88207	INP53;PHO13;INP52;INM1	Upregulated
negative regulation of apoptotic process (GO:0043066)	0.0131922	0.0233686	0.427654	0.982044	-0.434082	1.87877	BMH2;BMH1;TPS1	Upregulated
regulation of protein export from nucleus (GO:0046825)	0.00342421	0.00721614	0.364011	0.956964	-0.326231	1.85198	RSP5;GPA1;MSN5;CRM1	Upregulated
positive regulation of transcription elongation from RNA polymerase I promoter (GO:2001209)	0.00535538	0.0110095	0.423846	0.982044	-0.351043	1.83584	CTR9;SPT5;PAF1;CDC73	Upregulated
aromatic amino acid family biosynthetic process, prephenate pathway (GO:0009095)	0.00800159	0.0155804	0.356077	0.956964	-0.378979	1.82975	TYR1;ARO8;ARO7	Upregulated
regulation of vacuole fusion, non-autophagic (GO:0032889)	0.000615548	0.00158449	0.367966	0.956964	-0.245888	1.81785	CDC42;YPT7;ENO1;ENO2;RHO1;PEP5	Upregulated
vesicle organization (GO:0016050)	0.000117223	0.000381733	0.827892	0.999856	-0.19804	1.79254	SEC22;NYV1;SEC4;SED5;SEC28;VAC8;SAR1;GEA2;SNC1;VPS5;EMP24;YKT6;BET1;PEP5	Upregulated
regulation of pseudohyphal growth (GO:2000220)	0.00142521	0.00341282	0.57699	0.999856	-0.273075	1.78958	CDC42;SNF1;MKS1;RAS2;MUM2;GAL83;KAP123	Upregulated
regulation of organelle assembly (GO:1902115)	0.00342421	0.00721614	0.364011	0.956964	-0.313133	1.77762	BCY1;CDC28;RAS2;DHH1	Upregulated
macromolecule biosynthetic process (GO:0009059)	0.0131922	0.0233686	0.427654	0.982044	-0.409315	1.77157	RPL3;GTB1;EFT1	Upregulated
energy reserve metabolic process (GO:0006112)	0.00451231	0.00941727	0.521089	0.999856	-0.327669	1.76972	UGP1;GLC7;BMH2;BMH1;AAP1	Upregulated
protein urmylation (GO:0032447)	0.0198909	0.0328113	0.496149	0.999856	-0.444987	1.74323	NCS2;ELP2;NCS6	Upregulated
ribosome disassembly (GO:0032790)	0.0131922	0.0233686	0.427654	0.982044	-0.40189	1.73943	DOM34;RLI1;HBS1	Upregulated
positive regulation of gene expression, epigenetic (GO:0045815)	0.0131922	0.0233686	0.427654	0.982044	-0.400254	1.73235	RAP1;YTA7;ADR1	Upregulated
ribonucleoprotein complex disassembly (GO:0032988)	0.000615548	0.00158449	0.367966	0.956964	-0.233532	1.7265	DOM34;PRP43;DED1;HSP104;RLI1;HBS1	Upregulated
mitochondrial fusion (GO:0008053)	0.0131922	0.0233686	0.427654	0.982044	-0.396843	1.71759	MGM1;YTA12;AFG3	Upregulated
rRNA base methylation (GO:0070475)	0.00202763	0.00459333	0.303892	0.956964	-0.276661	1.71554	BMT6;EMG1;RCM1;NOP2	Upregulated
regulation of vesicle targeting, to, from or within Golgi (GO:0048209)	0.0198909	0.0328113	0.496149	0.999856	-0.437734	1.71482	SEC12;SEC23;SAR1	Upregulated
septin ring assembly (GO:0000921)	0.00339309	0.00721614	0.593928	0.999856	-0.300987	1.71142	CDC10;CDC11;CDC12;SHS1;GIN4;CDC3	Upregulated
antisense RNA transcript catabolic process (GO:0071041)	0.00800159	0.0155804	0.356077	0.956964	-0.349293	1.68643	RRP6;NRD1;PAP2	Upregulated
inositol phosphate catabolic process (GO:0071545)	0.0198909	0.0328113	0.496149	0.999856	-0.429828	1.68385	INP53;INP52;INM1	Upregulated
positive regulation of transcription from RNA polymerase II promoter in response to osmotic stress (GO:0061393)	0.00202763	0.00459333	0.303892	0.956964	-0.270904	1.67985	HOG1;MSN4;SKO1;MSN2	Upregulated
cell morphogenesis (GO:0000902)	0.00220698	0.00494038	0.419509	0.982044	-0.271179	1.65856	TAO3;RHO5;DOP1;SRV2;CAP2	Upregulated
actin cytoskeleton reorganization (GO:0031532)	0.00800159	0.0155804	0.356077	0.956964	-0.335826	1.6214	RVS161;RHO5;RHO1	Upregulated
macromolecular complex assembly (GO:0065003)	0.00243346	0.00543126	0.651148	0.999856	-0.266438	1.60354	VOA1;OST3;SGT1;YTA12;VPH1;SGF73;AFG3	Upregulated
regulation of secretion by cell (GO:1903530)	0.0131922	0.0233686	0.427654	0.982044	-0.367716	1.59152	SEC4;GYL1;SFH5	Upregulated
sphingolipid biosynthetic process (GO:0030148)	0.0017045	0.00400543	0.697516	0.999856	-0.247481	1.57756	FLC1;LCB2;FLC2;LCB1;SUR2;ELO3;LCB3;IFA38	Upregulated
dicarboxylic acid catabolic process (GO:0043649)	0.00800159	0.0155804	0.356077	0.956964	-0.324399	1.56624	AAT2;PCS60;BNA6	Upregulated
rRNA transport (GO:0051029)	0.00254166	0.0056147	0.551661	0.999856	-0.261833	1.56443	SRM1;RPS5;RPS3;RNA1;RPS2;RPS0A	Upregulated
nucleic acid phosphodiester bond hydrolysis (GO:0090305)	0.00321339	0.00694626	0.471081	0.999856	-0.26993	1.54952	NUC1;MOT2;NOT5;DCP1;EDC3	Upregulated
formation of translation preinitiation complex (GO:0001731)	0.00145122	0.00343159	0.367115	0.956964	-0.236713	1.547	TIF3;TMA64;PAT1;SUI2;GCD11	Upregulated
U1 snRNA 3'-end processing (GO:0034473)	0.0010808	0.00262976	0.245001	0.909573	-0.225649	1.5412	RRP6;RRP43;RRP45;RNT1	Upregulated
hexose metabolic process (GO:0019318)	0.00142521	0.00341282	0.57699	0.999856	-0.233493	1.53018	HXK1;HXK2;DOG2;PGM2;GLK1;PGM1;SEC53	Upregulated
mRNA destabilization (GO:0061157)	0.0131922	0.0233686	0.427654	0.982044	-0.34212	1.48074	WHI3;WHI4;XRN1	Upregulated
nicotinamide nucleotide biosynthetic process (GO:0019359)	0.00789864	0.0155804	0.482146	0.999856	-0.304201	1.47266	POS5;NPT1;QNS1;BNA6	Upregulated
cellular protein catabolic process (GO:0044257)	0.000146144	0.00044883	0.571589	0.999856	-0.166394	1.46941	KEX1;ASK10;APE3;CYM1;PRC1;CDC28;MCK1;PEP4;STE23;PEP5	Upregulated
DNA strand elongation (GO:0022616)	0.00321339	0.00694626	0.471081	0.999856	-0.255775	1.46826	MCM3;MCM4;TOP2;MCM6;TOP1	Upregulated
NAD biosynthetic process (GO:0009435)	0.00789864	0.0155804	0.482146	0.999856	-0.302976	1.46673	PNP1;NPT1;QNS1;BNA6	Upregulated
positive regulation of cytoplasmic mRNA processing body assembly (GO:0010606)	0.00800159	0.0155804	0.356077	0.956964	-0.303595	1.46579	PKH2;PKH1;PKC1	Upregulated
negative regulation of chromatin silencing at telomere (GO:0031939)	0.00614522	0.0124804	0.568941	0.999856	-0.286991	1.46138	CTI6;UME1;WTM1;RPD3;SIN3	Upregulated
glutamine family amino acid catabolic process (GO:0009065)	0.0111224	0.0207736	0.537934	0.999856	-0.322597	1.4513	CAR2;SWI6;SWI4;ASP1	Upregulated
maintenance of chromatin silencing (GO:0006344)	0.00800159	0.0155804	0.356077	0.956964	-0.300083	1.44884	NUP133;NUP145;NUP84	Upregulated
positive regulation of G1/S transition of mitotic cell cycle (GO:1900087)	0.000615548	0.00158449	0.367966	0.956964	-0.193578	1.43113	WHI3;XRN1;CDC25;GID8;CYS4;CCR4	Upregulated
RNA polymerase II transcriptional preinitiation complex assembly (GO:0051123)	0.00117836	0.00286254	0.735908	0.999856	-0.211689	1.42756	MED2;TAF12;GAL11;SRB2;TAF5;SPT15;TAF4;TAF2;TAF1	Upregulated
regulation of reciprocal meiotic recombination (GO:0010520)	0.0111224	0.0207736	0.537934	0.999856	-0.315925	1.42128	MSH2;SET2;SWI6;RPD3	Upregulated
inositol phosphate dephosphorylation (GO:0046855)	0.0198909	0.0328113	0.496149	0.999856	-0.362265	1.41917	INP53;INP52;INM1	Upregulated
'de novo' cotranslational protein folding (GO:0051083)	0.0198909	0.0328113	0.496149	0.999856	-0.359387	1.40789	SSZ1;SSB2;ZUO1	Upregulated
alcohol biosynthetic process (GO:0046165)	0.0281243	0.0446854	0.560234	0.999856	-0.391316	1.39744	ADH3;ADH1;SFA1	Upregulated
calcium-mediated signaling (GO:0019722)	0.00145122	0.00343159	0.367115	0.956964	-0.21057	1.37615	DPL1;CMP2;CNA1;LCB4;LCB3	Upregulated
response to UV (GO:0009411)	0.0198909	0.0328113	0.496149	0.999856	-0.350113	1.37157	MSH6;RSP5;RAD18	Upregulated
isoprenoid biosynthetic process (GO:0008299)	0.0198909	0.0328113	0.496149	0.999856	-0.349284	1.36832	IDI1;ERG20;HMG1	Upregulated
protein stabilization (GO:0050821)	0.00789864	0.0155804	0.482146	0.999856	-0.278279	1.34717	HSP60;ICP55;SGT1;HSP78	Upregulated
peptidyl-lysine dimethylation (GO:0018027)	0.00342421	0.00721614	0.364011	0.956964	-0.232188	1.31811	EFM1;EFM2;EFM4;RKM1	Upregulated
receptor-mediated endocytosis (GO:0006898)	0.00342421	0.00721614	0.364011	0.956964	-0.23146	1.31397	SWA2;MYO5;CHC1;ARC35	Upregulated
phosphatidylinositol dephosphorylation (GO:0046856)	0.0198909	0.0328113	0.496149	0.999856	-0.3338	1.30766	INP53;INP52;SAC1	Upregulated
carbohydrate derivative biosynthetic process (GO:1901137)	0.00220698	0.00494038	0.419509	0.982044	-0.208764	1.27683	ALG2;RNR4;RNR2;ALG1;RNR1	Upregulated
regulation of cytokinesis (GO:0032465)	0.00789864	0.0155804	0.482146	0.999856	-0.263369	1.27499	DBF2;VRP1;AIP1;KEL1	Upregulated
(1->3)-beta-D-glucan biosynthetic process (GO:0006075)	0.0281243	0.0446854	0.560234	0.999856	-0.353751	1.26329	FKS1;GAS1;GAS3	Upregulated
negative regulation of protein kinase activity (GO:0006469)	0.0198909	0.0328113	0.496149	0.999856	-0.320232	1.25451	GCN2;LSP1;PIL1	Upregulated
lysine biosynthetic process via aminoadipic acid (GO:0019878)	0.00202763	0.00459333	0.303892	0.956964	-0.202098	1.25319	LYS9;LYS1;LYS21;LYS4	Upregulated
protein deacetylation (GO:0006476)	0.000776594	0.00199225	0.496023	0.999856	-0.174889	1.25231	RCO1;HOS3;SET2;EAF3;HDA1;SIN3;SNT1	Upregulated
regulation of glycogen biosynthetic process (GO:0005979)	0.000904688	0.00228593	0.314783	0.956964	-0.176556	1.23729	PCL6;PCL8;PSK1;PHO85;PSK2	Upregulated
regulation of chromatin silencing at silent mating-type cassette (GO:0090054)	0.0198333	0.0328113	0.639346	0.999856	-0.311474	1.2211	CTI6;WTM1;RPD3;SIN3	Upregulated
nuclear-transcribed mRNA poly(A) tail shortening (GO:0000289)	0.00535538	0.0110095	0.423846	0.982044	-0.227438	1.18942	NOT3;NOT5;CDC39;CCR4	Upregulated
protein depolymerization (GO:0051261)	0.0111224	0.0207736	0.537934	0.999856	-0.261156	1.17489	AIP1;TWF1;UBP15;SRV2	Upregulated
retrograde transport, vesicle recycling within Golgi (GO:0000301)	0.00800159	0.0155804	0.356077	0.956964	-0.24314	1.17391	YPT6;COG4;COG1	Upregulated
positive regulation of cellular protein metabolic process (GO:0032270)	0.0198909	0.0328113	0.496149	0.999856	-0.296764	1.16257	DOM34;RLI1;HBS1	Upregulated
regulation of transcription elongation from RNA polymerase I promoter (GO:2001207)	0.00535538	0.0110095	0.423846	0.982044	-0.222212	1.16209	CTR9;SPT5;PAF1;CDC73	Upregulated
regulation of transcription-coupled nucleotide-excision repair (GO:0090262)	0.00202763	0.00459333	0.303892	0.956964	-0.182484	1.13156	CTR9;SPT5;PAF1;CDC73	Upregulated
cellular response to cold (GO:0070417)	0.0198909	0.0328113	0.496149	0.999856	-0.288102	1.12864	MSN4;MSN2;MGA2	Upregulated
regulation of meiotic cell cycle (GO:0051445)	0.0281243	0.0446854	0.560234	0.999856	-0.314283	1.12234	UME1;CDC28;RCK2	Upregulated
negative regulation of TOR signaling (GO:0032007)	0.0131922	0.0233686	0.427654	0.982044	-0.255964	1.10784	GCN2;HSF1;GCN1	Upregulated
regulation of actin cytoskeleton reorganization (GO:2000249)	0.0198909	0.0328113	0.496149	0.999856	-0.280202	1.09769	PEA2;BUD6;BNI1	Upregulated
regulation of ER to Golgi vesicle-mediated transport by GTP hydrolysis (GO:0090113)	0.0131922	0.0233686	0.427654	0.982044	-0.252485	1.09279	SEC12;SEC23;SAR1	Upregulated
intracellular mRNA localization (GO:0008298)	0.00142521	0.00341282	0.57699	0.999856	-0.16519	1.08256	RRP6;HEK2;MYO4;SPT5;NAM7;SSD1;SCP160	Upregulated
protein exit from endoplasmic reticulum (GO:0032527)	0.00220698	0.00494038	0.419509	0.982044	-0.176021	1.07656	CDC48;UFD1;NPL4;PMT2;PMT1	Upregulated
glyceraldehyde-3-phosphate metabolic process (GO:0019682)	0.0131922	0.0233686	0.427654	0.982044	-0.24068	1.04169	TAL1;RKI1;TKL1	Upregulated
galactose metabolic process (GO:0006012)	0.0281243	0.0446854	0.560234	0.999856	-0.289442	1.03363	GRE3;PGM2;PGM1	Upregulated
protein complex localization (GO:0031503)	0.00451231	0.00941727	0.521089	0.999856	-0.191151	1.03239	YPT6;ARL1;RPT2;SEH1;JSN1	Upregulated
retrograde protein transport, ER to cytosol (GO:0030970)	0.0281243	0.0446854	0.560234	0.999856	-0.288473	1.03017	CDC48;UFD1;NPL4	Upregulated
negative regulation of lipid biosynthetic process (GO:0051055)	0.0198909	0.0328113	0.496149	0.999856	-0.256148	1.00346	CSR1;YPK1;OPI1	Upregulated
regulation of endocytosis (GO:0030100)	0.00220698	0.00494038	0.419509	0.982044	-0.163938	1.00267	RSP5;AKL1;FKS1;SLG1;RHO1	Upregulated
negative regulation of transferase activity (GO:0051348)	0.00202763	0.00459333	0.303892	0.956964	-0.152274	0.944236	CDC48;UFD4;UFD1;NPL4	Upregulated
regulation of Ras protein signal transduction (GO:0046578)	0.0111224	0.0207736	0.537934	0.999856	-0.208942	0.939989	BCY1;PXL1;IRA1;MRPL35	Upregulated
tryptophan metabolic process (GO:0006568)	0.00132808	0.00320564	0.461805	0.999856	-0.141663	0.93838	TRP5;TRP4;TRP3;PDC1;TRP2;BNA6	Upregulated
hydrogen ion transmembrane transport (GO:1902600)	0.0281243	0.0446854	0.560234	0.999856	-0.261052	0.932249	YLH47;MDM38;PMA1	Upregulated
chromatin assembly or disassembly (GO:0006333)	0.00243346	0.00543126	0.651148	0.999856	-0.154497	0.929834	RSP5;SIR2;POB3;HAT2;TOP2;SPT16;TOP1	Upregulated
regulation of helicase activity (GO:0051095)	0.0198909	0.0328113	0.496149	0.999856	-0.23425	0.917671	MSH6;MSH2;SQS1	Upregulated
cellular response to glucose starvation (GO:0042149)	0.00132808	0.00320564	0.461805	0.999856	-0.137925	0.913621	BCY1;SSB2;YAK1;MSN4;SIP5;MSN2	Upregulated
snRNA pseudouridine synthesis (GO:0031120)	0.0131922	0.0233686	0.427654	0.982044	-0.209044	0.90477	CBF5;PUS1;PUS7	Upregulated
pentose metabolic process (GO:0019321)	0.00800159	0.0155804	0.356077	0.956964	-0.185944	0.897761	RBK1;RKI1;XKS1	Upregulated
positive regulation of helicase activity (GO:0051096)	0.0131922	0.0233686	0.427654	0.982044	-0.200361	0.867188	MSH6;MSH2;SQS1	Upregulated
negative regulation of cell aging (GO:0090344)	0.00800159	0.0155804	0.356077	0.956964	-0.178557	0.862093	SSA2;TSA1;RTG2	Upregulated
calcium ion transmembrane transport (GO:0070588)	0.0743576	0.10242	0.593405	0.999856	-0.330613	0.85922	YVC1;PMR1	Upregulated
organophosphate ester transport (GO:0015748)	0.00254166	0.0056147	0.551661	0.999856	-0.143372	0.856637	CSR1;PDR17;PDR16;SEC14;PHO91;SFH5	Upregulated
transcription elongation from RNA polymerase I promoter (GO:0006362)	0.0131922	0.0233686	0.427654	0.982044	-0.195737	0.847177	CTR9;PAF1;CDC73	Upregulated
water-soluble vitamin biosynthetic process (GO:0042364)	0.00310792	0.00682567	0.685164	0.999856	-0.146587	0.846364	RIB1;BIO4;ECM31;PAN6;PAN5;SPE3;MIS1	Upregulated
phosphorylation of RNA polymerase II C-terminal domain (GO:0070816)	0.00815236	0.0157926	0.614187	0.999856	-0.174876	0.841058	TFB3;TFB1;CDC28;SGV1;CCL1	Upregulated
cellular glucan metabolic process (GO:0006073)	0.00815236	0.0157926	0.614187	0.999856	-0.169333	0.814397	UGP1;GLC7;BMH2;BMH1;AAP1	Upregulated
phospholipid dephosphorylation (GO:0046839)	0.0281243	0.0446854	0.560234	0.999856	-0.216825	0.774309	INP53;INP52;SAC1	Upregulated
DNA biosynthetic process (GO:0071897)	0.0378824	0.0586478	0.619102	0.999856	-0.236196	0.773133	POL32;POL1;POL3	Upregulated
polyol metabolic process (GO:0019751)	0.0743576	0.10242	0.593405	0.999856	-0.29387	0.763731	INM1;VIP1	Upregulated
regulation of chromatin silencing (GO:0031935)	0.000555001	0.00145339	0.453736	0.999856	-0.0986394	0.739454	HIR1;RAP1;CTR9;YTA7;PAF1;ADR1;HDA1	Upregulated
protein localization to membrane (GO:0072657)	0.00599877	0.012282	0.773858	0.999856	-0.144142	0.737459	NUP145;SEC4;NUP157;VAC8;ENT4;NUP57;SLM1	Upregulated
parallel actin filament bundle assembly (GO:0030046)	0.0743576	0.10242	0.593405	0.999856	-0.272302	0.707678	SAC6;BNI1	Upregulated
fatty acid beta-oxidation (GO:0006635)	0.0150847	0.0261989	0.590494	0.999856	-0.163631	0.686279	AIM45;EHD3;MDH3;ERG10	Upregulated
positive regulation of transcription from RNA polymerase II promoter in response to arsenic-containing substance (GO:0061395)	0.00800159	0.0155804	0.356077	0.956964	-0.135865	0.655972	YAP1;MSN4;MSN2	Upregulated
ubiquinone metabolic process (GO:0006743)	0.0150847	0.0261989	0.590494	0.999856	-0.150727	0.632162	COQ4;COQ1;ARH1;COQ8	Upregulated
positive regulation of histone modification (GO:0031058)	0.0150847	0.0261989	0.590494	0.999856	-0.145333	0.609536	ASF1;GRX4;SET2;GRX3	Upregulated
cAMP-mediated signaling (GO:0019933)	0.0198909	0.0328113	0.496149	0.999856	-0.154685	0.605978	SOK1;SGT1;YVH1	Upregulated
homologous chromosome segregation (GO:0045143)	0.00899684	0.0172735	0.739083	0.999856	-0.125642	0.591885	CDC55;PDS5;TUB3;HRR25;TUB2;TUB1	Upregulated
regulation of apoptotic process (GO:0042981)	0.0111224	0.0207736	0.537934	0.999856	-0.127409	0.573187	DUN1;BMH2;NDI1;BMH1	Upregulated
peptidyl-lysine monomethylation (GO:0018026)	0.0198909	0.0328113	0.496149	0.999856	-0.145517	0.570063	EFM1;EFM4;RKM1	Upregulated
negative regulation of macromolecule metabolic process (GO:0010605)	0.0198909	0.0328113	0.496149	0.999856	-0.143607	0.562579	CLA4;MAP1;SMC2	Upregulated
positive regulation of organelle assembly (GO:1902117)	0.00342421	0.00721614	0.364011	0.956964	-0.0988206	0.560993	PKH2;PKH1;PKC1;YVH1	Upregulated
pantothenate biosynthetic process (GO:0015940)	0.00535538	0.0110095	0.423846	0.982044	-0.107194	0.560589	ECM31;PAN6;PAN5;SPE3	Upregulated
positive regulation of mitotic cytokinetic process (GO:1903438)	0.0281243	0.0446854	0.560234	0.999856	-0.146893	0.524574	SLT2;GLC7;RHO1	Upregulated
regulation of vacuole organization (GO:0044088)	0.0057061	0.0116987	0.671608	0.999856	-0.100243	0.517876	CDC42;YPT7;ENO1;ENO2;RHO1;PEP5	Upregulated
dolichol-linked oligosaccharide biosynthetic process (GO:0006488)	0.0281243	0.0446854	0.560234	0.999856	-0.14497	0.517706	DPM1;ALG9;ALG12	Upregulated
DNA topological change (GO:0006265)	0.0111224	0.0207736	0.537934	0.999856	-0.11004	0.495048	RFA1;RFA2;TOP2;TOP1	Upregulated
cell wall (1->3)-beta-D-glucan biosynthetic process (GO:0034411)	0.0743576	0.10242	0.593405	0.999856	-0.187144	0.486363	GAS1;GAS3	Upregulated
protein localization to nuclear envelope (GO:0090435)	0.0378824	0.0586478	0.619102	0.999856	-0.145418	0.475993	NUP145;NUP157;NUP57	Upregulated
metal ion transport (GO:0030001)	0.0491263	0.0734221	0.672353	0.999856	-0.152561	0.459722	YLH47;MDM38;ENA5	Upregulated
cytochrome complex assembly (GO:0017004)	0.0743576	0.10242	0.593405	0.999856	-0.174401	0.453246	COX15;CYC3	Upregulated
regulation of protein complex assembly (GO:0043254)	0.007217	0.0146374	0.706665	0.999856	-0.0906618	0.447082	SLT2;SEC12;SEC23;GAL83;SAR1;PEP5	Upregulated
protein-DNA complex subunit organization (GO:0071824)	0.0743576	0.10242	0.593405	0.999856	-0.169049	0.439336	SPT6;CHD1	Upregulated
organelle fusion (GO:0048284)	0.0281243	0.0446854	0.560234	0.999856	-0.122947	0.439059	MGM1;YTA12;AFG3	Upregulated
snoRNA catabolic process (GO:0016077)	0.0743576	0.10242	0.593405	0.999856	-0.163365	0.424564	RRP6;PAP2	Upregulated
inositol metabolic process (GO:0006020)	0.0198909	0.0328113	0.496149	0.999856	-0.107452	0.420943	INO1;INM1;VIP1	Upregulated
organelle transport along microtubule (GO:0072384)	0.0105721	0.0201189	0.656515	0.999856	-0.0893338	0.406428	SEC21;TUB3;TUB2;TUB1;NUM1	Upregulated
carboxylic acid biosynthetic process (GO:0046394)	0.0743576	0.10242	0.593405	0.999856	-0.151236	0.393043	MTD1;FOL2	Upregulated
N-terminal peptidyl-methionine acetylation (GO:0017196)	0.0743576	0.10242	0.593405	0.999856	-0.14973	0.389129	NAT1;MDM20	Upregulated
establishment of spindle orientation (GO:0051294)	0.00614522	0.0124804	0.568941	0.999856	-0.076411	0.389091	SNF1;ACT1;BNI1;MYO2;BCP1	Upregulated
regulation of chromosome organization (GO:0033044)	0.0743576	0.10242	0.593405	0.999856	-0.147457	0.383222	ISW1;CHD1	Upregulated
negative regulation of Rho protein signal transduction (GO:0035024)	0.00800159	0.0155804	0.356077	0.956964	-0.0785818	0.379402	SAC7;BEM3;BEM2	Upregulated
maintenance of DNA repeat elements (GO:0043570)	0.0010417	0.00259311	0.633417	0.999856	-0.0540808	0.371368	MSH6;MSH2;POL30;MRC1;CDC9;CTF18;RTG2;SRC1	Upregulated
fungal-type cell wall (1->3)-beta-D-glucan biosynthetic process (GO:0071970)	0.0743576	0.10242	0.593405	0.999856	-0.1419	0.36878	GAS1;GAS3	Upregulated
peptidyl-methionine modification (GO:0018206)	0.0743576	0.10242	0.593405	0.999856	-0.135278	0.351569	NAT1;MDM20	Upregulated
DNA recombination (GO:0006310)	0.000629098	0.00161661	0.903841	0.999856	-0.0468863	0.345609	POL2;SNF2;RFA1;RFA2;CDC9;MGM101;NUC1;THP2;MFT1;CGI121;MSH2;RDH54;NAM7	Upregulated
phosphatidylserine metabolic process (GO:0006658)	0.0743576	0.10242	0.593405	0.999856	-0.129521	0.336607	CDS1;PDR17	Upregulated
cellular amide metabolic process (GO:0043603)	0.0491263	0.0734221	0.672353	0.999856	-0.110176	0.332	PRD1;NIT3;ADE3	Upregulated
positive regulation of invasive growth in response to glucose limitation (GO:2000219)	0.0491263	0.0734221	0.672353	0.999856	-0.10766	0.324418	SNF2;GAL11;YTA7	Upregulated
spliceosomal tri-snRNP complex assembly (GO:0000244)	0.0743576	0.10242	0.593405	0.999856	-0.123348	0.320566	SNU114;PRP8	Upregulated
regulation of cell aging (GO:0090342)	0.00800159	0.0155804	0.356077	0.956964	-0.0631978	0.305126	CGI121;SSA2;TSA1	Upregulated
autophagosome assembly (GO:0000045)	0.0105337	0.0201189	0.842641	0.999856	-0.0669583	0.304873	SEC7;YPT6;HRR25;VPS30;ARL1;SEC18;YPT1	Upregulated
positive regulation of intracellular protein transport (GO:0090316)	0.0743576	0.10242	0.593405	0.999856	-0.115036	0.298965	CLA4;SAR1	Upregulated
response to hexose (GO:0009746)	0.0743576	0.10242	0.593405	0.999856	-0.107785	0.280118	GSY2;GSY1	Upregulated
acylglycerol catabolic process (GO:0046464)	0.0988237	0.129508	0.661213	0.999856	-0.105003	0.243021	AYR1;TGL4	Upregulated
regulation of intracellular pH (GO:0051453)	0.0281243	0.0446854	0.560234	0.999856	-0.0649567	0.231968	PFK2;PMA1;PFK1	Upregulated
regulation of mRNA metabolic process (GO:1903311)	0.0743576	0.10242	0.593405	0.999856	-0.0781988	0.203228	WHI3;SPT6	Upregulated
negative regulation of nucleic acid-templated transcription (GO:1903507)	0.0198909	0.0328113	0.496149	0.999856	-0.0506338	0.198358	CDC28;EAF3;MOT1	Upregulated
maintenance of protein localization in organelle (GO:0072595)	0.0743576	0.10242	0.593405	0.999856	-0.071132	0.184863	SDS22;WTM1	Upregulated
nucleotide transport (GO:0006862)	0.0743576	0.10242	0.593405	0.999856	-0.0693923	0.180342	FLC1;FLC2	Upregulated
positive regulation of protein polymerization (GO:0032273)	0.00614522	0.0124804	0.568941	0.999856	-0.0353505	0.180008	NAP1;SPC34;DUO1;RHO5;BNI1	Upregulated
regulation of protein kinase activity (GO:0045859)	0.0111224	0.0207736	0.537934	0.999856	-0.0384076	0.172788	CDC11;CDC12;LSP1;PIL1	Upregulated
RNA-dependent DNA biosynthetic process (GO:0006278)	0.0057061	0.0116987	0.671608	0.999856	-0.0326201	0.168523	POL32;POL1;RFA1;POL3;RFA2;HEK2	Upregulated
regulation of cellular amide metabolic process (GO:0034248)	0.0491263	0.0734221	0.672353	0.999856	-0.054831	0.165226	PUF6;PPH21;TPD3	Upregulated
proton-transporting V-type ATPase complex assembly (GO:0070070)	0.0743576	0.10242	0.593405	0.999856	-0.0562661	0.146228	PFK2;VPH2	Upregulated
DNA replication initiation (GO:0006270)	0.00399619	0.00838645	0.802512	0.999856	-0.025334	0.139905	CTF4;POL1;ORC1;MCM3;MCM4;BMH2;CTF18;PRI1	Upregulated
maintenance of DNA trinucleotide repeats (GO:0035753)	0.0150847	0.0261989	0.590494	0.999856	-0.0331929	0.139213	POL30;CDC9;CTF18;RTG2	Upregulated
histone ubiquitination (GO:0016574)	0.0378824	0.0586478	0.619102	0.999856	-0.0412825	0.135129	ASF1;BRE1;PEP5	Upregulated
regulation of protein phosphorylation (GO:0001932)	0.0254045	0.0414986	0.684217	0.999856	-0.0264932	0.0973051	ASF1;CLA4;RTS1;ASC1	Upregulated
telomere organization (GO:0032200)	0.00453297	0.00944733	0.877214	0.999856	-0.0179265	0.0967382	PBP2;THP2;RFA1;CGI121;HEK2;RAP1;MRC1;GBP2;HSC82	Upregulated
DNA unwinding involved in DNA replication (GO:0006268)	0.00535538	0.0110095	0.423846	0.982044	-0.0183304	0.0958618	RFA1;RFA2;MCM4;MCM6	Upregulated
positive regulation of translational fidelity (GO:0045903)	0.0491263	0.0734221	0.672353	0.999856	-0.0315193	0.094979	NAM9;RPS2;GCD11	Upregulated
attachment of mitotic spindle microtubules to kinetochore (GO:0051315)	0.0617942	0.091005	0.719905	0.999856	-0.0326892	0.0910048	MAD1;CDC28;SEH1	Upregulated
cofactor transport (GO:0051181)	0.0988237	0.129508	0.661213	0.999856	-0.0353335	0.0817765	TDH3;PET9	Upregulated
alditol metabolic process (GO:0019400)	0.0988237	0.129508	0.661213	0.999856	-0.0336257	0.077824	GPD2;GUT2	Upregulated
protein localization to endoplasmic reticulum (GO:0070972)	0.0743576	0.10242	0.593405	0.999856	-0.0278815	0.0724604	YET1;YET3	Upregulated
negative regulation of macroautophagy (GO:0016242)	0.0988237	0.129508	0.661213	0.999856	-0.0289503	0.067003	XRN1;PHO85	Upregulated
protein localization to nuclear inner membrane (GO:0036228)	0.0281243	0.0446854	0.560234	0.999856	-0.0132471	0.0473071	NUP145;NUP157;NUP57	Upregulated
DNA conformation change (GO:0071103)	0.00451231	0.00941727	0.521089	0.999856	-0.00412481	0.0222779	RFA1;RFA2;RDH54;TOP2;TOP1	Upregulated
DNA replication checkpoint (GO:0000076)	0.00254166	0.0056147	0.551661	0.999856	-0.00359576	0.0214844	POL2;ORC1;RFC2;MRC1;GLC7;CCR4	Upregulated
mitochondrion localization (GO:0051646)	0.0281243	0.0446854	0.560234	0.999856	-0.00230961	0.00824789	ARP2;JSN1;NUM1	Upregulated
cytoskeleton-dependent cytokinesis (GO:0061640)	0.00321339	0.00694626	0.471081	0.999856	-0.000726355	0.00416959	CDC10;CDC11;CDC12;SHS1;CDC3	Upregulated
positive regulation of transcription from RNA polymerase II promoter in response to nitrogen starvation (GO:0036278)	0.0131922	0.0233686	0.427654	0.982044	0.000533309	-0.00230823	BCY1;MSN4;MSN2	Upregulated
polyol biosynthetic process (GO:0046173)	0.0988237	0.129508	0.661213	0.999856	0.00336991	-0.00779937	INO1;VIP1	Upregulated
regulation of cellular protein metabolic process (GO:0032268)	0.0491263	0.0734221	0.672353	0.999856	0.00826626	-0.0249092	PUF6;PPH21;TPD3	Upregulated
aerobic respiration (GO:0009060)	0.00167781	0.00395503	0.891346	0.999856	0.00440792	-0.0281677	MAS1;ADE16;COR1;MDH1;QCR2;IPP1;SDH2;ETR1;COX20;PAH1;PET9	Upregulated
cellular response to starvation (GO:0009267)	0.00845195	0.0163311	0.925266	0.999856	0.00613436	-0.0292815	SNF1;DCS2;DPL1;DCS1;SSB2;VPS30;PEP4;SIP5;ZPR1	Upregulated
positive regulation of protein complex assembly (GO:0031334)	0.0198909	0.0328113	0.496149	0.999856	0.00786694	-0.0308187	VTA1;SLY1;VPS45	Upregulated
L-phenylalanine metabolic process (GO:0006558)	0.0378824	0.0586478	0.619102	0.999856	0.019101	-0.0625226	ARO8;ARO7;PDC1	Upregulated
endonucleolytic cleavage involved in rRNA processing (GO:0000478)	0.00800159	0.0155804	0.356077	0.956964	0.0145621	-0.0703075	RCL1;BMS1;TSR1	Upregulated
endoplasmic reticulum to cytosol transport (GO:1903513)	0.0281243	0.0446854	0.560234	0.999856	0.0204312	-0.0729624	CDC48;UFD1;NPL4	Upregulated
phosphatidylinositol phosphorylation (GO:0046854)	0.0198909	0.0328113	0.496149	0.999856	0.0250555	-0.0981548	STT4;FAB1;PIK1	Upregulated
autophagy of peroxisome (GO:0030242)	0.00899684	0.0172735	0.739083	0.999856	0.0216913	-0.102185	SLT2;SLG1;COG4;HRR25;VPS30;PKC1	Upregulated
positive regulation of ATPase activity (GO:0032781)	0.181594	0.218637	0.811065	0.999856	0.0701554	-0.119684	SWA2;SQS1	Upregulated
isoleucine metabolic process (GO:0006549)	0.00800159	0.0155804	0.356077	0.956964	0.0260801	-0.125918	ILV5;LPD1;ILV1	Upregulated
ion homeostasis (GO:0050801)	0.0254045	0.0414986	0.684217	0.999856	0.0345141	-0.126764	HRK1;CMP2;CNA1;GLC7	Upregulated
regulation of kinase activity (GO:0043549)	0.0988237	0.129508	0.661213	0.999856	0.05709	-0.13213	VAC14;YPT1	Upregulated
protein lipoylation (GO:0009249)	0.0988237	0.129508	0.661213	0.999856	0.0686536	-0.158893	LIP5;GCV3	Upregulated
protein localization to cell cortex (GO:0072697)	0.0131922	0.0233686	0.427654	0.982044	0.0404054	-0.17488	CDC24;PIL1;ABP1	Upregulated
aromatic amino acid family catabolic process to alcohol via Ehrlich pathway (GO:0000949)	0.38693	0.429891	0.846206	0.999856	0.191752	-0.182071	PDC1	Upregulated
regulation of phosphate metabolic process (GO:0019220)	0.0378824	0.0586478	0.619102	0.999856	0.0561207	-0.183698	RSP5;PHO85;TAP42	Upregulated
positive regulation of formin-nucleated actin cable assembly (GO:0090338)	0.0743576	0.10242	0.593405	0.999856	0.0713045	-0.185311	BUD6;RHO3	Upregulated
DNA duplex unwinding (GO:0032508)	0.016789	0.0288603	0.731751	0.999856	0.0498187	-0.203611	RFA1;RFA2;RDH54;MCM4;MCM6	Upregulated
tRNA pseudouridine synthesis (GO:0031119)	0.0198909	0.0328113	0.496149	0.999856	0.0521863	-0.204439	DEG1;PUS1;PUS7	Upregulated
positive regulation of deoxyribonuclease activity (GO:0032077)	0.0988237	0.129508	0.661213	0.999856	0.0899354	-0.208148	POL30;SSC1	Upregulated
potassium ion homeostasis (GO:0055075)	0.0131922	0.0233686	0.427654	0.982044	0.0504484	-0.218347	TRK1;MDM38;VHC1	Upregulated
replication fork arrest (GO:0043111)	0.0988237	0.129508	0.661213	0.999856	0.0949099	-0.219661	MSH6;MSH2	Upregulated
amino acid transport (GO:0006865)	0.926557	0.926557	0.999856	0.999856	2.88646	-0.220179	GNP1	Upregulated
ribonucleoside bisphosphate biosynthetic process (GO:0034030)	0.125135	0.157828	0.719603	0.999856	0.106659	-0.221677	CAB2;SIS2	Upregulated
fungal-type cell wall (1->3)-beta-D-glucan metabolic process (GO:0071969)	0.0522389	0.077997	0.515894	0.999856	0.0755482	-0.223013	GAS1;GAS3	Upregulated
regulation of double-strand break repair via nonhomologous end joining (GO:2001032)	0.38693	0.429891	0.846206	0.999856	0.265107	-0.251722	CDC28	Upregulated
fermentation (GO:0006113)	0.434948	0.468096	0.882321	0.999856	0.308547	-0.256874	ADH3	Upregulated
cristae formation (GO:0042407)	0.0150847	0.0261989	0.590494	0.999856	0.0613259	-0.257205	MIC26;YTA12;MIC60;AFG3	Upregulated
microtubule polymerization (GO:0046785)	0.804367	0.805968	0.996389	0.999856	1.20037	-0.261319	TUB4	Upregulated
regulation of actin filament polymerization (GO:0030833)	0.125135	0.157828	0.719603	0.999856	0.126637	-0.263199	RHO5;BNI1	Upregulated
mitotic sister chromatid cohesion (GO:0007064)	0.00320151	0.00694626	0.845	0.999856	0.0490908	-0.281984	CTF4;NPA3;POL2;PDS5;POL30;MRC1;CTF18;SMC3;SMC1	Upregulated
fatty acid oxidation (GO:0019395)	0.0910727	0.123197	0.798628	0.999856	0.119019	-0.285181	EHD3;MDH3;ERG10	Upregulated
DNA amplification (GO:0006277)	0.38693	0.429891	0.846206	0.999856	0.302076	-0.286824	POL32	Upregulated
cellular response to nitrogen starvation (GO:0006995)	0.0105721	0.0201189	0.656515	0.999856	0.0636864	-0.289744	SNF1;BCY1;VPS30;MSN4;MSN2	Upregulated
meiotic sister chromatid cohesion (GO:0051177)	0.125135	0.157828	0.719603	0.999856	0.14008	-0.291137	RTS1;SMC3	Upregulated
'de novo' NAD biosynthetic process from tryptophan (GO:0034354)	0.38693	0.429891	0.846206	0.999856	0.312498	-0.29672	BNA6	Upregulated
regulation of phosphorylation of RNA polymerase II C-terminal domain (GO:1901407)	0.0281243	0.0446854	0.560234	0.999856	0.0832281	-0.297218	PAF1;CCL1;RAT1	Upregulated
negative regulation of meiotic cell cycle (GO:0051447)	0.152852	0.187012	0.76926	0.999856	0.159521	-0.299627	PDR16;CDC28	Upregulated
regulation of growth of unicellular organism as a thread of attached cells (GO:0070784)	0.0198909	0.0328113	0.496149	0.999856	0.0765632	-0.299936	TUP1;MKS1;KAP123	Upregulated
cellular response to fatty acid (GO:0071398)	0.38693	0.429891	0.846206	0.999856	0.319067	-0.302958	ADR1	Upregulated
cellular calcium ion homeostasis (GO:0006874)	0.00321339	0.00694626	0.471081	0.999856	0.0532318	-0.305574	VMA2;PGM2;PMR1;PMC1;SPF1	Upregulated
microtubule nucleation (GO:0007020)	0.787731	0.790346	0.995278	0.999856	1.311	-0.312803	TUB4	Upregulated
histone deubiquitination (GO:0016578)	0.434948	0.468096	0.882321	0.999856	0.382039	-0.318058	SGF73	Upregulated
nuclear retention of pre-mRNA at the site of transcription (GO:0071033)	0.0111224	0.0207736	0.537934	0.999856	0.0719656	-0.323759	RRP6;RRP4;RRP40;MTR4	Upregulated
inorganic anion transport (GO:0015698)	0.769681	0.772749	0.993825	0.999856	1.24883	-0.326919	PHO91	Upregulated
(1->6)-beta-D-glucan metabolic process (GO:0006077)	0.434948	0.468096	0.882321	0.999856	0.393288	-0.327423	UGP1	Upregulated
monovalent inorganic cation homeostasis (GO:0055067)	0.125135	0.157828	0.719603	0.999856	0.158264	-0.328931	PMA1;VHC1	Upregulated
cytoplasmic microtubule organization (GO:0031122)	0.0198909	0.0328113	0.496149	0.999856	0.084669	-0.33169	VPS4;SAP1;BUD6	Upregulated
regulation of glycolytic process by positive regulation of transcription from RNA polymerase II promoter (GO:0072363)	0.434948	0.468096	0.882321	0.999856	0.399396	-0.332508	RAP1	Upregulated
spliceosomal complex disassembly (GO:0000390)	0.0988237	0.129508	0.661213	0.999856	0.143736	-0.332665	PRP43;DED1	Upregulated
assembly of large subunit precursor of preribosome (GO:1902626)	0.0491263	0.0734221	0.672353	0.999856	0.110425	-0.332749	NOP2;SPB4;RPF2	Upregulated
postreplication repair (GO:0006301)	0.01344	0.0236689	0.695733	0.999856	0.0777129	-0.334905	POL32;MSH2;POL30;RPO21;RAD18	Upregulated
negative regulation of nitrogen compound metabolic process (GO:0051172)	0.0743576	0.10242	0.593405	0.999856	0.129442	-0.336403	YPK1;SEC14	Upregulated
transcription of nuclear large rRNA transcript from RNA polymerase I promoter (GO:0042790)	0.0105721	0.0201189	0.656515	0.999856	0.0742212	-0.337672	RPA135;RPA190;RPA43;MOT1;SPT15	Upregulated
positive regulation of mitotic cell cycle (GO:0045931)	0.434948	0.468096	0.882321	0.999856	0.408574	-0.34015	CDC28	Upregulated
amino acid catabolic process via Ehrlich pathway (GO:0000955)	0.0131922	0.0233686	0.427654	0.982044	0.0786133	-0.340248	ADH3;ADH1;SFA1	Upregulated
activation of protein kinase activity (GO:0032147)	0.804367	0.805968	0.996389	0.999856	1.57271	-0.342378	CLA4	Upregulated
(1->6)-beta-D-glucan biosynthetic process (GO:0006078)	0.434948	0.468096	0.882321	0.999856	0.411324	-0.342439	UGP1	Upregulated
histone lysine methylation (GO:0034968)	0.728849	0.733216	0.989442	0.999856	1.10146	-0.34838	SET5	Upregulated
positive regulation of kinase activity (GO:0033674)	0.0281243	0.0446854	0.560234	0.999856	0.0977848	-0.349201	VAC14;CDC11;CDC12	Upregulated
biotin metabolic process (GO:0006768)	0.434948	0.468096	0.882321	0.999856	0.420099	-0.349744	BIO4	Upregulated
peptide transport (GO:0015833)	0.705795	0.711445	0.986196	0.999856	1.00576	-0.350436	PGA3	Upregulated
drug transport (GO:0015893)	0.819701	0.820244	0.997239	0.999856	1.76685	-0.351278	PDR5	Upregulated
translation reinitiation (GO:0002188)	0.38693	0.429891	0.846206	0.999856	0.383041	-0.363702	TIF34	Upregulated
cellular response to UV (GO:0034644)	0.125135	0.157828	0.719603	0.999856	0.176216	-0.36624	RSP5;RSC2	Upregulated
positive regulation of DNA metabolic process (GO:0051054)	0.434948	0.468096	0.882321	0.999856	0.448116	-0.37307	RPS3	Upregulated
protein import into peroxisome matrix, docking (GO:0016560)	0.434948	0.468096	0.882321	0.999856	0.450098	-0.374719	PEX14	Upregulated
DNA double-strand break processing (GO:0000729)	0.152852	0.187012	0.76926	0.999856	0.200574	-0.376735	CDC28;FUN30	Upregulated
replication-born double-strand break repair via sister chromatid exchange (GO:1990414)	0.728849	0.733216	0.989442	0.999856	1.19849	-0.37907	SMC3	Upregulated
regulation of transcription from RNA polymerase II promoter in response to osmotic stress (GO:0061392)	0.0988237	0.129508	0.661213	0.999856	0.164065	-0.379715	HOG1;SKO1	Upregulated
regulation of chromatin silencing at rDNA (GO:0061187)	0.0491263	0.0734221	0.672353	0.999856	0.128187	-0.386274	CTI6;RPD3;SIN3	Upregulated
RNA splicing, via transesterification reactions with guanosine as nucleophile (GO:0000376)	0.653646	0.661526	0.976405	0.999856	0.911458	-0.387543	MSS116	Upregulated
DNA-templated transcriptional preinitiation complex assembly (GO:0070897)	0.00266304	0.00587423	0.826561	0.999856	0.0654819	-0.388196	MED2;TAF12;GAL11;SRB2;TAF5;SPT15;TAF4;TAF2;TAF1	Upregulated
cell wall beta-glucan biosynthetic process (GO:0034410)	0.0743576	0.10242	0.593405	0.999856	0.151669	-0.394169	GAS1;GAS3	Upregulated
monocarboxylic acid transport (GO:0015718)	0.653646	0.661526	0.976405	0.999856	0.930035	-0.395441	YBT1	Upregulated
cellular lipid catabolic process (GO:0044242)	0.38693	0.429891	0.846206	0.999856	0.418164	-0.397052	PAH1	Upregulated
ribose phosphate metabolic process (GO:0019693)	0.0281243	0.0446854	0.560234	0.999856	0.11225	-0.400858	TAL1;RKI1;TKL1	Upregulated
protein polymerization (GO:0051258)	0.479207	0.505291	0.909959	0.999856	0.545533	-0.401306	UFD4	Upregulated
chitin biosynthetic process (GO:0006031)	0.38693	0.429891	0.846206	0.999856	0.425923	-0.404418	PCM1	Upregulated
heterochromatin assembly (GO:0031507)	0.38693	0.429891	0.846206	0.999856	0.42701	-0.40545	FUN30	Upregulated
response to ethanol (GO:0045471)	0.479207	0.505291	0.909959	0.999856	0.552515	-0.406442	UFD2	Upregulated
removal of nonhomologous ends (GO:0000735)	0.434948	0.468096	0.882321	0.999856	0.488555	-0.406736	MSH2	Upregulated
negative regulation of pseudohyphal growth (GO:2000221)	0.592259	0.603849	0.959679	0.999856	0.782343	-0.4098	MUM2	Upregulated
oligosaccharide-lipid intermediate biosynthetic process (GO:0006490)	0.00321339	0.00694626	0.471081	0.999856	0.0714395	-0.410093	DPM1;ALG9;ALG2;ALG12;ALG1	Upregulated
cellular response to oxygen-containing compound (GO:1901701)	0.592259	0.603849	0.959679	0.999856	0.783548	-0.410431	YPK1	Upregulated
positive regulation of spindle pole body separation (GO:0010696)	0.479207	0.505291	0.909959	0.999856	0.558982	-0.4112	CDC28	Upregulated
pyridoxine biosynthetic process (GO:0008615)	0.38693	0.429891	0.846206	0.999856	0.43365	-0.411755	RKI1	Upregulated
spindle disassembly (GO:0051230)	0.0988237	0.129508	0.661213	0.999856	0.177922	-0.411785	CDC48;NPL4	Upregulated
telomere capping (GO:0016233)	0.680783	0.687609	0.981952	0.999856	1.09306	-0.420295	RAP1	Upregulated
protein import into peroxisome matrix (GO:0016558)	0.00899684	0.0172735	0.739083	0.999856	0.0895858	-0.422028	MDH2;DJP1;GPD1;CAJ1;PEX14;PEX25	Upregulated
negative regulation of MAP kinase activity (GO:0043407)	0.592259	0.603849	0.959679	0.999856	0.806875	-0.42265	PTC2	Upregulated
regulation of phospholipid translocation (GO:0061091)	0.0743576	0.10242	0.593405	0.999856	0.163003	-0.423624	FPK1;YPK1	Upregulated
cellular response to methylmercury (GO:0071406)	0.479207	0.505291	0.909959	0.999856	0.580635	-0.427128	MSN2	Upregulated
snRNA modification (GO:0040031)	0.0131922	0.0233686	0.427654	0.982044	0.101272	-0.438317	CBF5;PUS1;PUS7	Upregulated
positive regulation of actin filament bundle assembly (GO:0032233)	0.0988237	0.129508	0.661213	0.999856	0.189657	-0.438946	BUD6;RHO3	Upregulated
negative regulation of transcription by pheromones (GO:0045996)	0.181594	0.218637	0.811065	0.999856	0.257331	-0.439002	ISW2;ITC1	Upregulated
regulation of glycolytic process by regulation of transcription from RNA polymerase II promoter (GO:0072361)	0.434948	0.468096	0.882321	0.999856	0.529143	-0.440527	RAP1	Upregulated
mitochondrial respiratory chain complex III assembly (GO:0034551)	0.152852	0.187012	0.76926	0.999856	0.237142	-0.44542	FMP25;CBP3	Upregulated
regulation of autophagosome assembly (GO:2000785)	0.434948	0.468096	0.882321	0.999856	0.535167	-0.445542	YVH1	Upregulated
regulation of endodeoxyribonuclease activity (GO:0032071)	0.434948	0.468096	0.882321	0.999856	0.539904	-0.449486	SSC1	Upregulated
positive regulation of protein catabolic process (GO:0045732)	0.125135	0.157828	0.719603	0.999856	0.217861	-0.452795	RSP5;RPT2	Upregulated
superoxide metabolic process (GO:0006801)	0.38693	0.429891	0.846206	0.999856	0.477095	-0.453007	BEM1	Upregulated
regulation of histone deacetylation (GO:0031063)	0.0743576	0.10242	0.593405	0.999856	0.174465	-0.453413	GRX4;GRX3	Upregulated
outer mitochondrial membrane organization (GO:0007008)	0.705795	0.711445	0.986196	0.999856	1.305	-0.454701	DJP1	Upregulated
negative regulation of homeostatic process (GO:0032845)	0.38693	0.429891	0.846206	0.999856	0.479312	-0.455112	ASC1	Upregulated
regulation of actin filament bundle assembly (GO:0032231)	0.520002	0.542251	0.93111	0.999856	0.702502	-0.459383	KEL1	Upregulated
response to oleic acid (GO:0034201)	0.38693	0.429891	0.846206	0.999856	0.48732	-0.462715	ADR1	Upregulated
glucan catabolic process (GO:0009251)	0.479207	0.505291	0.909959	0.999856	0.640379	-0.471077	GPH1	Upregulated
cellular response to pH (GO:0071467)	0.0378824	0.0586478	0.619102	0.999856	0.145474	-0.476176	INP53;INP52;MSN4	Upregulated
regulation of lipid biosynthetic process (GO:0046890)	0.0988237	0.129508	0.661213	0.999856	0.20621	-0.477255	RSP5;GIS1	Upregulated
rDNA condensation (GO:0070550)	0.0378824	0.0586478	0.619102	0.999856	0.145978	-0.477825	TOF2;SMC4;SMC2	Upregulated
regulation of MAPK cascade (GO:0043408)	0.592259	0.603849	0.959679	0.999856	0.914178	-0.478856	CLA4	Upregulated
anion transmembrane transport (GO:0098656)	0.705795	0.711445	0.986196	0.999856	1.38791	-0.483589	PHO91	Upregulated
pentose catabolic process (GO:0019323)	0.0131922	0.0233686	0.427654	0.982044	0.112073	-0.485068	GRE3;XKS1;YPR1	Upregulated
establishment of mitotic sister chromatid cohesion (GO:0034087)	0.728849	0.733216	0.989442	0.999856	1.53726	-0.486218	POL30	Upregulated
regulation of TOR signaling (GO:0032006)	0.125135	0.157828	0.719603	0.999856	0.234335	-0.487034	HSF1;CDC60	Upregulated
positive regulation of cyclin-dependent protein serine/threonine kinase activity (GO:0045737)	0.520002	0.542251	0.93111	0.999856	0.745693	-0.487626	CCL1	Upregulated
ion transport (GO:0006811)	0.479207	0.505291	0.909959	0.999856	0.66341	-0.48802	POR1	Upregulated
glycerolipid catabolic process (GO:0046503)	0.434948	0.468096	0.882321	0.999856	0.587333	-0.488971	PGC1	Upregulated
pyridoxal phosphate biosynthetic process (GO:0042823)	0.557602	0.574327	0.947295	0.999856	0.839816	-0.490544	PDX3	Upregulated
generation of catalytic spliceosome for first transesterification step (GO:0000349)	0.181594	0.218637	0.811065	0.999856	0.290117	-0.494933	PRP19;SNU114	Upregulated
sodium ion transport (GO:0006814)	0.434948	0.468096	0.882321	0.999856	0.595	-0.495354	ENA5	Upregulated
positive regulation of histone acetylation (GO:0035066)	0.152852	0.187012	0.76926	0.999856	0.26572	-0.499098	ASF1;SET2	Upregulated
polyol transport (GO:0015791)	0.624203	0.633426	0.969155	0.999856	1.05903	-0.499099	ITR1	Upregulated
protein acetylation (GO:0006473)	0.592259	0.603849	0.959679	0.999856	0.953355	-0.499378	NAT1	Upregulated
negative regulation of chromatin silencing at silent mating-type cassette (GO:0061186)	0.0111224	0.0207736	0.537934	0.999856	0.111193	-0.500233	CTI6;WTM1;RPD3;SIN3	Upregulated
zinc ion homeostasis (GO:0055069)	0.624203	0.633426	0.969155	0.999856	1.06533	-0.502067	ZRT3	Upregulated
negative regulation of gluconeogenesis (GO:0045721)	0.592259	0.603849	0.959679	0.999856	0.961622	-0.503708	GID8	Upregulated
protein geranylgeranylation (GO:0018344)	0.38693	0.429891	0.846206	0.999856	0.530681	-0.503887	MRS6	Upregulated
endonucleolytic cleavage to generate mature 3'-end of SSU-rRNA from (SSU-rRNA, 5.8S rRNA, LSU-rRNA) (GO:0000461)	0.0743576	0.10242	0.593405	0.999856	0.194486	-0.505445	TSR1;RPS0A	Upregulated
SRP-dependent cotranslational protein targeting to membrane, translocation (GO:0006616)	0.00186117	0.00435329	0.507488	0.999856	0.0808169	-0.508059	SRP72;KAR2;SSA2;SRP54;SRP68;SIL1	Upregulated
protein prenylation (GO:0018342)	0.479207	0.505291	0.909959	0.999856	0.69204	-0.50908	MRS6	Upregulated
negative regulation of actin nucleation (GO:0051126)	0.434948	0.468096	0.882321	0.999856	0.612305	-0.509762	SLA1	Upregulated
peptidyl-serine dephosphorylation (GO:0070262)	0.0131922	0.0233686	0.427654	0.982044	0.118439	-0.512619	CDC55;PTC5;PPH21	Upregulated
RNA stabilization (GO:0043489)	0.0743576	0.10242	0.593405	0.999856	0.197339	-0.512859	HEK2;MGA2	Upregulated
response to methylmercury (GO:0051597)	0.479207	0.505291	0.909959	0.999856	0.699951	-0.514899	MSN2	Upregulated
inner mitochondrial membrane organization (GO:0007007)	0.0017045	0.00400543	0.697516	0.999856	0.0834465	-0.531928	AIM24;PHB1;MIC26;TIM54;YTA12;MIC60;AFG3;TOM70	Upregulated
nuclear polyadenylation-dependent snoRNA catabolic process (GO:0071036)	0.0743576	0.10242	0.593405	0.999856	0.204933	-0.532593	RRP6;PAP2	Upregulated
tRNA transcription (GO:0009304)	0.01344	0.0236689	0.695733	0.999856	0.123949	-0.534158	RET1;RPO31;RPB5;RPC82;RPC40	Upregulated
positive regulation of cell proliferation (GO:0008284)	0.592259	0.603849	0.959679	0.999856	1.02154	-0.535093	CDC28	Upregulated
amino acid catabolic process to alcohol via Ehrlich pathway (GO:0000947)	0.0111224	0.0207736	0.537934	0.999856	0.120671	-0.542875	ADH3;ADH1;SFA1;PDC1	Upregulated
protein oligomerization (GO:0051259)	0.0198333	0.0328113	0.639346	0.999856	0.13854	-0.543131	VPS4;STE2;ATP4;DNM1	Upregulated
positive regulation of mitotic cell cycle phase transition (GO:1901992)	0.750097	0.754089	0.991925	0.999856	1.89751	-0.545634	CDC55	Upregulated
tRNA transcription from RNA polymerase III promoter (GO:0042797)	0.01344	0.0236689	0.695733	0.999856	0.126852	-0.546669	RET1;RPO31;RPB5;RPC82;RPC40	Upregulated
pyridoxine metabolic process (GO:0008614)	0.479207	0.505291	0.909959	0.999856	0.747514	-0.549888	RKI1	Upregulated
mRNA stabilization (GO:0048255)	0.0743576	0.10242	0.593405	0.999856	0.212038	-0.55106	HEK2;MGA2	Upregulated
protein localization to nucleolar rDNA repeats (GO:0034503)	0.0743576	0.10242	0.593405	0.999856	0.212648	-0.552644	TOF2;RPD3	Upregulated
negative regulation of transposition (GO:0010529)	0.152852	0.187012	0.76926	0.999856	0.294708	-0.553547	RTT107;RTT103	Upregulated
positive regulation of nitrogen compound metabolic process (GO:0051173)	0.0378824	0.0586478	0.619102	0.999856	0.170732	-0.558852	CSR1;PDR17;PDC2	Upregulated
positive regulation of TORC1 signaling (GO:1904263)	0.211032	0.250683	0.845967	0.999856	0.360789	-0.561296	SEC13;SEH1	Upregulated
DNA replication-dependent nucleosome organization (GO:0034723)	0.0743576	0.10242	0.593405	0.999856	0.216611	-0.562944	RLF2;ASF1	Upregulated
SCF-dependent proteasomal ubiquitin-dependent protein catabolic process (GO:0031146)	0.819701	0.820244	0.997239	0.999856	2.85032	-0.566689	CDC34	Upregulated
Group I intron splicing (GO:0000372)	0.653646	0.661526	0.976405	0.999856	1.35758	-0.577228	MSS116	Upregulated
negative regulation of mitotic cell cycle (GO:0045930)	0.434948	0.468096	0.882321	0.999856	0.698914	-0.581866	CDC28	Upregulated
DNA double-strand break attachment to nuclear envelope (GO:1990683)	0.38693	0.429891	0.846206	0.999856	0.613489	-0.582514	RTT107	Upregulated
fatty acid catabolic process (GO:0009062)	0.0105721	0.0201189	0.656515	0.999856	0.128306	-0.583732	EHT1;EHD3;MDH3;ERG10;PAH1	Upregulated
fungal-type cell wall biogenesis (GO:0009272)	0.00614522	0.0124804	0.568941	0.999856	0.115437	-0.587813	SNF1;SLT2;FLC1;FLC2;CWH41	Upregulated
positive regulation of glucose metabolic process (GO:0010907)	0.0198909	0.0328113	0.496149	0.999856	0.151208	-0.592354	SNF1;PDC2;SNF4	Upregulated
protein localization to cell periphery (GO:1990778)	0.0198333	0.0328113	0.639346	0.999856	0.151643	-0.594502	CDC24;SEC4;ENT4;SLM1	Upregulated
nuclear migration along microtubule (GO:0030473)	0.0318243	0.0502997	0.724999	0.999856	0.174467	-0.601478	TUB3;TUB2;TUB1;NUM1	Upregulated
energy coupled proton transport, down electrochemical gradient (GO:0015985)	0.0472611	0.072499	0.794503	0.999856	0.197309	-0.602199	ATP3;ATP4;ATP1;ATP2	Upregulated
NAD metabolic process (GO:0019674)	0.0378824	0.0586478	0.619102	0.999856	0.184804	-0.604914	NPT1;QNS1;BNA6	Upregulated
pre-mRNA cleavage required for polyadenylation (GO:0098789)	0.039108	0.0604214	0.761718	0.999856	0.186866	-0.605713	PTA1;PTI1;MPE1;CFT2	Upregulated
nucleosome assembly (GO:0006334)	0.00254166	0.0056147	0.551661	0.999856	0.101617	-0.607155	NAP1;RLF2;HIR1;ASF1;SPT6;SPT16	Upregulated
centromere complex assembly (GO:0034508)	0.270892	0.314376	0.898749	0.999856	0.469881	-0.613681	SGT1;ARP4	Upregulated
phosphatidylethanolamine biosynthetic process (GO:0006646)	0.125135	0.157828	0.719603	0.999856	0.296043	-0.615285	PSD1;CKI1	Upregulated
endocytic recycling (GO:0032456)	0.0988237	0.129508	0.661213	0.999856	0.26638	-0.616514	RTT10;YPT1	Upregulated
phospholipid translocation (GO:0045332)	0.300862	0.347556	0.918299	0.999856	0.514187	-0.617592	DNF1;NEO1	Upregulated
establishment of protein localization to chromosome (GO:0070199)	0.0988237	0.129508	0.661213	0.999856	0.266983	-0.61791	RAP1;RTS1	Upregulated
thiamine biosynthetic process (GO:0009228)	0.624203	0.633426	0.969155	0.999856	1.31182	-0.618234	THI20	Upregulated
heme transport (GO:0015886)	0.0743576	0.10242	0.593405	0.999856	0.238401	-0.619574	TDH3;PET9	Upregulated
positive regulation of cellular catabolic process (GO:0031331)	0.680783	0.687609	0.981952	0.999856	1.62486	-0.624779	CDC28	Upregulated
organic anion transport (GO:0015711)	0.00146341	0.00345501	0.761178	0.999856	0.0959503	-0.626267	CSR1;PDR17;FLC1;PDR16;FLC2;SEC14;PHO91;SFH5;PET9	Upregulated
asparagine catabolic process (GO:0006530)	0.0378824	0.0586478	0.619102	0.999856	0.194021	-0.635082	SWI6;SWI4;ASP1	Upregulated
positive regulation of protein modification by small protein conjugation or removal (GO:1903322)	0.520002	0.542251	0.93111	0.999856	0.976453	-0.638526	UFD2	Upregulated
posttranscriptional regulation of gene expression (GO:0010608)	0.0491263	0.0734221	0.672353	0.999856	0.212086	-0.639092	PUF6;PPH21;TPD3	Upregulated
meiosis I (GO:0007127)	0.039108	0.0604214	0.761718	0.999856	0.198869	-0.644618	CDC55;TUB3;TUB2;TUB1	Upregulated
mRNA cleavage involved in mRNA processing (GO:0098787)	0.0472611	0.072499	0.794503	0.999856	0.211711	-0.646156	PTA1;PTI1;MPE1;CFT2	Upregulated
glutathione catabolic process (GO:0006751)	0.0743576	0.10242	0.593405	0.999856	0.250599	-0.651274	DUG1;DUG2	Upregulated
phosphatidylglycerol metabolic process (GO:0046471)	0.520002	0.542251	0.93111	0.999856	0.996289	-0.651497	PGC1	Upregulated
mitochondrial translational initiation (GO:0070124)	0.125135	0.157828	0.719603	0.999856	0.313702	-0.651988	MRP51;RSM28	Upregulated
positive regulation of ribosomal protein gene transcription from RNA polymerase II promoter (GO:0060963)	0.181594	0.218637	0.811065	0.999856	0.383368	-0.654018	SFP1;FHL1	Upregulated
negative regulation of transcription from RNA polymerase II promoter by pheromones (GO:0046020)	0.240879	0.282365	0.874903	0.999856	0.460774	-0.655893	ISW2;ITC1	Upregulated
positive regulation of macroautophagy (GO:0016239)	0.00254166	0.0056147	0.551661	0.999856	0.111085	-0.663724	SNF1;GCN2;RPD3;PHO85;GCN1;YVH1	Upregulated
progressive alteration of chromatin involved in replicative cell aging (GO:0001304)	0.38693	0.429891	0.846206	0.999856	0.699189	-0.663887	HDA1	Upregulated
fatty acid elongation (GO:0030497)	0.0743576	0.10242	0.593405	0.999856	0.256263	-0.665995	ELO3;IFA38	Upregulated
mitotic spindle orientation checkpoint (GO:0031578)	0.330612	0.380468	0.934255	0.999856	0.60551	-0.670185	RTS1;BMH1	Upregulated
generation of catalytic spliceosome for second transesterification step (GO:0000350)	0.557602	0.574327	0.947295	0.999856	1.15338	-0.673697	PRP8	Upregulated
cellular zinc ion homeostasis (GO:0006882)	0.624203	0.633426	0.969155	0.999856	1.43047	-0.674153	ZRT3	Upregulated
protein deneddylation (GO:0000338)	0.434948	0.468096	0.882321	0.999856	0.81455	-0.678136	RPN5	Upregulated
cellular response to oleic acid (GO:0071400)	0.38693	0.429891	0.846206	0.999856	0.71715	-0.680941	ADR1	Upregulated
free ubiquitin chain polymerization (GO:0010994)	0.38693	0.429891	0.846206	0.999856	0.718751	-0.682462	UFD4	Upregulated
replication fork processing (GO:0031297)	0.624203	0.633426	0.969155	0.999856	1.45424	-0.685354	GLC7	Upregulated
N-terminal protein amino acid modification (GO:0031365)	0.152852	0.187012	0.76926	0.999856	0.366881	-0.689107	NAT1;TAE1	Upregulated
dephosphorylation of RNA polymerase II C-terminal domain (GO:0070940)	0.0131922	0.0233686	0.427654	0.982044	0.159282	-0.689392	RTR1;GLC7;FCP1	Upregulated
assembly of actomyosin apparatus involved in mitotic cytokinesis (GO:1902407)	0.434948	0.468096	0.882321	0.999856	0.830336	-0.691278	BNI1	Upregulated
MAPK cascade (GO:0000165)	0.557602	0.574327	0.947295	0.999856	1.1939	-0.697369	HOG1	Upregulated
rRNA export from nucleus (GO:0006407)	0.00254166	0.0056147	0.551661	0.999856	0.117546	-0.70233	SRM1;RPS5;RPS3;RNA1;RPS2;RPS0A	Upregulated
positive regulation of DNA-dependent DNA replication (GO:2000105)	0.557602	0.574327	0.947295	0.999856	1.2027	-0.702507	CDC28	Upregulated
mitochondrial electron transport, cytochrome c to oxygen (GO:0006123)	0.769681	0.772749	0.993825	0.999856	2.69428	-0.705306	CYC1	Upregulated
meiosis II (GO:0007135)	0.557602	0.574327	0.947295	0.999856	1.20793	-0.705562	RDH54	Upregulated
cellular modified amino acid catabolic process (GO:0042219)	0.0378824	0.0586478	0.619102	0.999856	0.215888	-0.706658	SAH1;DUG1;DUG2	Upregulated
positive regulation of cyclin-dependent protein kinase activity (GO:1904031)	0.520002	0.542251	0.93111	0.999856	1.08107	-0.706938	CCL1	Upregulated
regulation of Cvt pathway (GO:2001159)	0.38693	0.429891	0.846206	0.999856	0.746732	-0.70903	HRR25	Upregulated
cleavage in ITS2 between 5.8S rRNA and LSU-rRNA of tricistronic rRNA transcript (SSU-rRNA, 5.8S rRNA, LSU-rRNA) (GO:0000448)	0.181594	0.218637	0.811065	0.999856	0.415717	-0.709205	TOM1;RAT1	Upregulated
intracellular lipid transport (GO:0032365)	0.0150847	0.0261989	0.590494	0.999856	0.169767	-0.712015	DET1;OSH3;KES1;OSH2	Upregulated
protein localization to vacuole (GO:0072665)	0.434948	0.468096	0.882321	0.999856	0.857747	-0.714099	YPT7	Upregulated
regulation of invasive growth in response to glucose limitation (GO:2000217)	0.0150847	0.0261989	0.590494	0.999856	0.17028	-0.714165	SNF2;GAL11;TUP1;YTA7	Upregulated
carbohydrate derivative transport (GO:1901264)	0.479207	0.505291	0.909959	0.999856	0.974787	-0.717075	PHO91	Upregulated
nuclear envelope organization (GO:0006998)	0.520002	0.542251	0.93111	0.999856	1.10413	-0.722015	ACC1	Upregulated
intra-S DNA damage checkpoint (GO:0031573)	0.0910727	0.123197	0.798628	0.999856	0.301683	-0.722861	POL2;BRE1;MRC1	Upregulated
regulation of transcription from RNA polymerase II promoter in response to oxidative stress (GO:0043619)	0.125135	0.157828	0.719603	0.999856	0.348072	-0.723421	YAP1;SKN7	Upregulated
heterochromatin organization (GO:0070828)	0.520002	0.542251	0.93111	0.999856	1.11359	-0.728203	POL2	Upregulated
response to cadmium ion (GO:0046686)	0.38693	0.429891	0.846206	0.999856	0.770011	-0.731133	PRX1	Upregulated
positive regulation of protein serine/threonine kinase activity (GO:0071902)	0.0758071	0.103754	0.761898	0.999856	0.283487	-0.731273	PKH2;PKH1;CCL1	Upregulated
negative regulation of supramolecular fiber organization (GO:1902904)	0.557602	0.574327	0.947295	0.999856	1.26009	-0.736031	MHP1	Upregulated
regulation of glycogen metabolic process (GO:0070873)	0.38693	0.429891	0.846206	0.999856	0.77554	-0.736383	PCL6	Upregulated
DNA strand renaturation (GO:0000733)	0.557602	0.574327	0.947295	0.999856	1.27151	-0.742703	MGM101	Upregulated
response to glucose (GO:0009749)	0.0378824	0.0586478	0.619102	0.999856	0.226924	-0.742785	GSY2;GSY1;ROD1	Upregulated
establishment or maintenance of actin cytoskeleton polarity (GO:0030950)	0.0105721	0.0201189	0.656515	0.999856	0.163847	-0.745429	GVP36;SLM1;RHO3;RHO1;RHO2	Upregulated
negative regulation of microtubule polymerization or depolymerization (GO:0031111)	0.38693	0.429891	0.846206	0.999856	0.786946	-0.747213	MHP1	Upregulated
G2/M transition of mitotic cell cycle (GO:0000086)	0.0161841	0.0280117	0.820652	0.999856	0.183882	-0.758277	CDC34;PIN4;RPD3;STH1;SIN3;ZPR1	Upregulated
mRNA export from nucleus in response to heat stress (GO:0031990)	0.0491263	0.0734221	0.672353	0.999856	0.252317	-0.760322	NUP133;NUP188;NUP84	Upregulated
synapsis (GO:0007129)	0.0299946	0.047557	0.820904	0.999856	0.217192	-0.761634	PDS5;CDC28;SMC3;SMC4;SMC2	Upregulated
regulation of ribosomal protein gene transcription from RNA polymerase II promoter (GO:0060962)	0.240879	0.282365	0.874903	0.999856	0.536429	-0.763585	SFP1;FHL1	Upregulated
mitochondrion disassembly (GO:0061726)	0.58048	0.597076	0.998465	0.999856	1.40557	-0.764488	SNX4;WHI2;STT4	Upregulated
regulation of cellular amino acid metabolic process (GO:0006521)	0.38693	0.429891	0.846206	0.999856	0.806816	-0.76608	CAR1	Upregulated
positive regulation of transcription by pheromones (GO:0009371)	0.479207	0.505291	0.909959	0.999856	1.04303	-0.767278	PLP2	Upregulated
telomere maintenance (GO:0000723)	0.00610304	0.0124786	0.977748	0.999856	0.150681	-0.768316	PBP2;THP2;RFA1;BRE1;RFA2;CGI121;HEK2;RAP1;MRC1;INO80;GBP2;HSC82	Upregulated
coenzyme transport (GO:0051182)	0.152852	0.187012	0.76926	0.999856	0.409387	-0.768946	FLC1;FLC2	Upregulated
cellular hyperosmotic salinity response (GO:0071475)	0.0988237	0.129508	0.661213	0.999856	0.333894	-0.772771	MSN4;MSN2	Upregulated
protein maturation by iron-sulfur cluster transfer (GO:0097428)	0.479207	0.505291	0.909959	0.999856	1.05142	-0.773445	MET18	Upregulated
inositol phosphate biosynthetic process (GO:0032958)	0.38693	0.429891	0.846206	0.999856	0.816808	-0.775568	VIP1	Upregulated
actin polymerization or depolymerization (GO:0008154)	0.0131922	0.0233686	0.427654	0.982044	0.179212	-0.775655	AIP1;TWF1;SRV2	Upregulated
dolichol metabolic process (GO:0019348)	0.38693	0.429891	0.846206	0.999856	0.818227	-0.776915	DPM1	Upregulated
thiamine metabolic process (GO:0006772)	0.653646	0.661526	0.976405	0.999856	1.8321	-0.778991	THI20	Upregulated
cellular response to acid chemical (GO:0071229)	0.479207	0.505291	0.909959	0.999856	1.06256	-0.781644	YPK1	Upregulated
kinetochore assembly (GO:0051382)	0.181594	0.218637	0.811065	0.999856	0.458465	-0.782132	SGT1;ARP4	Upregulated
regulation of cell division (GO:0051302)	0.0198909	0.0328113	0.496149	0.999856	0.200473	-0.785352	DBF2;VRP1;KEL1	Upregulated
cellular response to nutrient levels (GO:0031669)	0.00899684	0.0172735	0.739083	0.999856	0.167072	-0.787055	DCS2;DPL1;DCS1;SRB2;PEP4;ZPR1	Upregulated
sphingolipid catabolic process (GO:0030149)	0.38693	0.429891	0.846206	0.999856	0.830196	-0.78828	DPL1	Upregulated
regulation of glucan biosynthetic process (GO:0010962)	0.38693	0.429891	0.846206	0.999856	0.832061	-0.790051	PCL6	Upregulated
kinetochore organization (GO:0051383)	0.240879	0.282365	0.874903	0.999856	0.555616	-0.790897	SGT1;ARP4	Upregulated
mitochondrial electron transport, succinate to ubiquinone (GO:0006121)	0.520002	0.542251	0.93111	0.999856	1.21152	-0.792242	SDH1	Upregulated
regulation of TORC1 signaling (GO:1903432)	0.0150847	0.0261989	0.590494	0.999856	0.18948	-0.794695	GCN2;SEC13;SEH1;GCN1	Upregulated
vacuolar protein processing (GO:0006624)	0.479207	0.505291	0.909959	0.999856	1.08543	-0.798466	PEP4	Upregulated
potassium ion transport (GO:0006813)	0.0988237	0.129508	0.661213	0.999856	0.345073	-0.798643	YLH47;MDM38	Upregulated
DNA geometric change (GO:0032392)	0.444776	0.477313	0.973053	0.999856	0.989647	-0.801795	RDH54;MGM101	Upregulated
mitochondrial transmembrane transport (GO:1990542)	0.300862	0.347556	0.918299	0.999856	0.670111	-0.804872	TIM54;TOM70	Upregulated
negative regulation of transcription from RNA polymerase II promoter by glucose (GO:0000433)	0.211032	0.250683	0.845967	0.999856	0.517876	-0.805684	TUP1;SPT6	Upregulated
nuclear-transcribed mRNA catabolic process, endonucleolytic cleavage-dependent decay (GO:0000294)	0.0491263	0.0734221	0.672353	0.999856	0.26878	-0.80993	POP1;RPP1;RNT1	Upregulated
regulation of phosphoprotein phosphatase activity (GO:0043666)	0.520002	0.542251	0.93111	0.999856	1.24122	-0.811663	GIP3	Upregulated
regulation of spindle assembly (GO:0090169)	0.38693	0.429891	0.846206	0.999856	0.857741	-0.814434	CDC28	Upregulated
negative regulation of actin filament polymerization (GO:0030837)	0.38693	0.429891	0.846206	0.999856	0.858313	-0.814977	TWF1	Upregulated
mRNA 5'-splice site recognition (GO:0000395)	0.38693	0.429891	0.846206	0.999856	0.86031	-0.816873	PRP28	Upregulated
regulation of ubiquitin protein ligase activity (GO:1904666)	0.0988237	0.129508	0.661213	0.999856	0.353199	-0.817451	BMH2;BMH1	Upregulated
oligosaccharide catabolic process (GO:0009313)	0.592259	0.603849	0.959679	0.999856	1.56914	-0.82193	AMS1	Upregulated
cell wall chitin metabolic process (GO:0006037)	0.0988237	0.129508	0.661213	0.999856	0.355714	-0.823271	PCM1;CHS5	Upregulated
chromosome organization (GO:0051276)	0.000988534	0.00247707	0.84936	0.999856	0.120163	-0.831439	MSH6;GLE2;MSH2;NUP133;MLP2;NUP157;YTM1;MRC1;TOP2;SMC4;SMC2	Upregulated
regulation of phosphatidylcholine biosynthetic process (GO:2001245)	0.00800159	0.0155804	0.356077	0.956964	0.172458	-0.832647	CSR1;PDR17;SEC14	Upregulated
phospholipid catabolic process (GO:0009395)	0.479207	0.505291	0.909959	0.999856	1.13532	-0.83517	PGC1	Upregulated
regulation of sphingolipid biosynthetic process (GO:0090153)	0.520002	0.542251	0.93111	0.999856	1.28721	-0.841739	YPK1	Upregulated
RNA phosphodiester bond hydrolysis (GO:0090501)	0.240879	0.282365	0.874903	0.999856	0.593661	-0.845052	POP1;RPP1	Upregulated
quinone biosynthetic process (GO:1901663)	0.0150847	0.0261989	0.590494	0.999856	0.202312	-0.848512	COQ4;COQ1;ARH1;COQ8	Upregulated
5S class rRNA transcription from RNA polymerase III type 1 promoter (GO:0042791)	0.125135	0.157828	0.719603	0.999856	0.408795	-0.849624	TFC3;TFC1	Upregulated
negative regulation of growth of unicellular organism as a thread of attached cells (GO:0070785)	0.592259	0.603849	0.959679	0.999856	1.62219	-0.84972	MUM2	Upregulated
cytoplasmic mRNA processing body assembly (GO:0033962)	0.0131922	0.0233686	0.427654	0.982044	0.196705	-0.851367	PAT1;DHH1;EDC3	Upregulated
positive regulation of filamentous growth of a population of unicellular organisms in response to starvation (GO:1900436)	0.434948	0.468096	0.882321	0.999856	1.02314	-0.851795	SNF1	Upregulated
nuclear polyadenylation-dependent CUT catabolic process (GO:0071039)	0.0491263	0.0734221	0.672353	0.999856	0.282782	-0.852124	RRP6;DIS3;PAP2	Upregulated
protein import into mitochondrial outer membrane (GO:0045040)	0.592259	0.603849	0.959679	0.999856	1.63733	-0.857649	DJP1	Upregulated
'de novo' NAD biosynthetic process (GO:0034627)	0.479207	0.505291	0.909959	0.999856	1.17587	-0.864998	BNA6	Upregulated
pyrimidine deoxyribonucleotide biosynthetic process (GO:0009221)	0.0988237	0.129508	0.661213	0.999856	0.375522	-0.869115	CDC21;YGL101W	Upregulated
phosphatidylethanolamine metabolic process (GO:0046337)	0.211032	0.250683	0.845967	0.999856	0.562153	-0.874567	PSD1;CKI1	Upregulated
erythrose 4-phosphate/phosphoenolpyruvate family amino acid catabolic process (GO:1902222)	0.38693	0.429891	0.846206	0.999856	0.921556	-0.875027	PDC1	Upregulated
cellular sphingolipid homeostasis (GO:0090156)	0.434948	0.468096	0.882321	0.999856	1.05113	-0.875092	VPS53	Upregulated
positive regulation of transcription from RNA polymerase II promoter by pheromones (GO:0007329)	0.479207	0.505291	0.909959	0.999856	1.1932	-0.877745	PLP2	Upregulated
regulation of DNA replication (GO:0006275)	0.557602	0.574327	0.947295	0.999856	1.50773	-0.880681	SIR2	Upregulated
maintenance of rDNA (GO:0043007)	0.557602	0.574327	0.947295	0.999856	1.50957	-0.881754	SRC1	Upregulated
adenine nucleotide transport (GO:0051503)	0.434948	0.468096	0.882321	0.999856	1.0606	-0.882979	PET9	Upregulated
protein sumoylation (GO:0016925)	0.270892	0.314376	0.898749	0.999856	0.676104	-0.883015	AOS1;UBA2	Upregulated
positive regulation of cellular process (GO:0048522)	0.388878	0.431421	0.957734	0.999856	0.935525	-0.883594	CDC28;ETT1	Upregulated
nucleoside triphosphate metabolic process (GO:0009141)	0.434948	0.468096	0.882321	0.999856	1.06211	-0.884241	LSC1	Upregulated
regulation of cell cycle (GO:0051726)	0.0164465	0.0284332	0.961846	0.999856	0.215438	-0.884944	CLA4;SIS2;SMI1;CDC25;CDC39;GLC7;CMK2;RCK2;CMK1	Upregulated
protein lipidation (GO:0006497)	0.665012	0.672579	0.999504	0.999856	2.17117	-0.885732	CDC1;DPM1;TED1	Upregulated
mitotic DNA damage checkpoint (GO:0044773)	0.0206482	0.0339863	0.764566	0.999856	0.229005	-0.88857	MSH6;POL2;BRE1;DUN1;MRC1	Upregulated
negative regulation of cell growth (GO:0030308)	0.557602	0.574327	0.947295	0.999856	1.52342	-0.889846	MUM2	Upregulated
triglyceride metabolic process (GO:0006641)	0.0254045	0.0414986	0.684217	0.999856	0.242355	-0.890128	SAH1;AYR1;TGL4;PAH1	Upregulated
axial cellular bud site selection (GO:0007120)	0.0617942	0.091005	0.719905	0.999856	0.323254	-0.899921	RSR1;BUD4;BUD3	Upregulated
chitin metabolic process (GO:0006030)	0.520002	0.542251	0.93111	0.999856	1.37643	-0.900081	CTS1	Upregulated
ubiquitin-dependent endocytosis (GO:0070086)	0.0491263	0.0734221	0.672353	0.999856	0.303382	-0.914199	RSP5;ECM21;ROD1	Upregulated
interstrand cross-link repair (GO:0036297)	0.0491263	0.0734221	0.672353	0.999856	0.304125	-0.916439	MSH6;MSH2;MGM101	Upregulated
riboflavin metabolic process (GO:0006771)	0.434948	0.468096	0.882321	0.999856	1.11248	-0.926173	RIB1	Upregulated
nuclear migration (GO:0007097)	0.016789	0.0288603	0.731751	0.999856	0.227024	-0.927855	TUB3;TUB2;TUB1;TOP1;NUM1	Upregulated
vitamin B6 biosynthetic process (GO:0042819)	0.557602	0.574327	0.947295	0.999856	1.61081	-0.940889	RKI1	Upregulated
positive regulation of cytokinesis, actomyosin contractile ring assembly (GO:2000433)	0.0743576	0.10242	0.593405	0.999856	0.362047	-0.940912	GLC7;RHO1	Upregulated
attachment of spindle microtubules to kinetochore involved in homologous chromosome segregation (GO:0051455)	0.434948	0.468096	0.882321	0.999856	1.13863	-0.94794	HRR25	Upregulated
negative regulation of kinase activity (GO:0033673)	0.0743576	0.10242	0.593405	0.999856	0.36628	-0.951914	LSP1;PIL1	Upregulated
tryptophan catabolic process (GO:0006569)	0.479207	0.505291	0.909959	0.999856	1.29634	-0.953617	PDC1	Upregulated
nucleus localization (GO:0051647)	0.38693	0.429891	0.846206	0.999856	1.01378	-0.962596	TOP1	Upregulated
phosphate ion transport (GO:0006817)	0.211032	0.250683	0.845967	0.999856	0.619713	-0.964116	PHO91;MIR1	Upregulated
transition metal ion transport (GO:0000041)	0.420661	0.465314	0.991173	0.999856	1.12216	-0.971706	BPT1;PMR1;ZRT3	Upregulated
regulation of translation in response to stress (GO:0043555)	0.38693	0.429891	0.846206	0.999856	1.02576	-0.973968	TRL1	Upregulated
lipid translocation (GO:0034204)	0.330612	0.380468	0.934255	0.999856	0.886226	-0.980884	DNF1;NEO1	Upregulated
regulation of establishment or maintenance of cell polarity (GO:0032878)	0.0131922	0.0233686	0.427654	0.982044	0.227306	-0.983809	SFH5;BEM1;PHO85	Upregulated
regulation of RNA metabolic process (GO:0051252)	0.152852	0.187012	0.76926	0.999856	0.526434	-0.988793	RSP5;SPT5	Upregulated
RNA splicing (GO:0008380)	0.624203	0.633426	0.969155	0.999856	2.10494	-0.992014	PRP4	Upregulated
positive regulation of microtubule polymerization or depolymerization (GO:0031112)	0.0758071	0.103754	0.761898	0.999856	0.386548	-0.997126	NAP1;SPC34;DUO1	Upregulated
global genome nucleotide-excision repair (GO:0070911)	0.125135	0.157828	0.719603	0.999856	0.483506	-1.0049	ABF1;PAF1	Upregulated
anatomical structure homeostasis (GO:0060249)	0.00382209	0.00804342	0.86186	0.999856	0.181257	-1.00905	PBP2;THP2;RFA1;CGI121;HEK2;RAP1;MRC1;GBP2;HSC82	Upregulated
purine ribonucleotide transport (GO:0015868)	0.434948	0.468096	0.882321	0.999856	1.21795	-1.01398	PET9	Upregulated
regulation of cytoplasmic translational elongation (GO:1900247)	0.125135	0.157828	0.719603	0.999856	0.493964	-1.02664	DPH5;DPH6	Upregulated
ammonium transport (GO:0015696)	0.4977	0.524425	0.98294	0.999856	1.47355	-1.02818	FAA1;FAA4	Upregulated
negative regulation of cellular process (GO:0048523)	0.0988237	0.129508	0.661213	0.999856	0.445987	-1.0322	SSA2;TSA1	Upregulated
riboflavin biosynthetic process (GO:0009231)	0.434948	0.468096	0.882321	0.999856	1.25556	-1.04529	RIB1	Upregulated
protein catabolic process in the vacuole (GO:0007039)	0.270892	0.314376	0.898749	0.999856	0.800472	-1.04544	APE3;PRC1	Upregulated
pyrimidine-containing compound salvage (GO:0008655)	0.38693	0.429891	0.846206	0.999856	1.10766	-1.05173	FUR1	Upregulated
flavin-containing compound biosynthetic process (GO:0042727)	0.479207	0.505291	0.909959	0.999856	1.43694	-1.05704	RIB1	Upregulated
positive regulation of cell cycle (GO:0045787)	0.471638	0.505291	0.978542	0.999856	1.40712	-1.05751	CDC28;CCL1	Upregulated
positive regulation of mitotic actomyosin contractile ring assembly (GO:1903501)	0.0743576	0.10242	0.593405	0.999856	0.410041	-1.06564	GLC7;RHO1	Upregulated
nitrogen catabolite regulation of transcription from RNA polymerase II promoter (GO:0001079)	0.592259	0.603849	0.959679	0.999856	2.03548	-1.06621	RTG2	Upregulated
regulation of cellular catabolic process (GO:0031329)	0.557602	0.574327	0.947295	0.999856	1.82631	-1.06676	WHI3	Upregulated
ncRNA transcription (GO:0098781)	0.152852	0.187012	0.76926	0.999856	0.56809	-1.06704	RSC9;RNT1	Upregulated
inositol phosphate metabolic process (GO:0043647)	0.434948	0.468096	0.882321	0.999856	1.28814	-1.07241	VIP1	Upregulated
vesicle docking (GO:0048278)	0.143346	0.179153	0.881364	0.999856	0.552609	-1.07344	SED5;SEC18;YPT1	Upregulated
DNA replication, removal of RNA primer (GO:0043137)	0.181594	0.218637	0.811065	0.999856	0.63271	-1.07939	POL32;POL3	Upregulated
heteroduplex formation (GO:0030491)	0.0281243	0.0446854	0.560234	0.999856	0.302599	-1.08062	RFA1;RFA2;RDH54	Upregulated
adenylate cyclase-modulating G-protein coupled receptor signaling pathway (GO:0007188)	0.125135	0.157828	0.719603	0.999856	0.520352	-1.08148	GPA1;IRA1	Upregulated
intralumenal vesicle formation (GO:0070676)	0.125135	0.157828	0.719603	0.999856	0.52168	-1.08424	VPS4;BRO1	Upregulated
positive regulation of nuclear-transcribed mRNA catabolic process, deadenylation-dependent decay (GO:1900153)	0.38693	0.429891	0.846206	0.999856	1.14216	-1.08449	EDC3	Upregulated
heterochromatin organization involved in chromatin silencing (GO:0070868)	0.0617942	0.091005	0.719905	0.999856	0.390526	-1.0872	POL2;ISW1;FUN30	Upregulated
regulation of cyclin-dependent protein kinase activity (GO:1904029)	0.24547	0.287523	0.954177	0.999856	0.774262	-1.08751	TFB3;PTC2;BCP1	Upregulated
negative regulation of sequence-specific DNA binding transcription factor activity (GO:0043433)	0.0743576	0.10242	0.593405	0.999856	0.418966	-1.08884	RPT6;PHO85	Upregulated
hydrogen peroxide catabolic process (GO:0042744)	0.0131922	0.0233686	0.427654	0.982044	0.253114	-1.09551	AHP1;TSA1;CCP1	Upregulated
coenzyme A metabolic process (GO:0015936)	0.152852	0.187012	0.76926	0.999856	0.585843	-1.10038	CAB2;SIS2	Upregulated
second-messenger-mediated signaling (GO:0019932)	0.00789864	0.0155804	0.482146	0.999856	0.228086	-1.10418	DPL1;VTC4;LCB4;LCB3	Upregulated
positive regulation of catabolic process (GO:0009896)	0.0988237	0.129508	0.661213	0.999856	0.481089	-1.11344	RSP5;RPT2	Upregulated
calcium ion transport (GO:0006816)	0.152852	0.187012	0.76926	0.999856	0.595536	-1.11859	PMR1;PMC1	Upregulated
peptidyl-diphthamide metabolic process (GO:0017182)	0.125135	0.157828	0.719603	0.999856	0.545779	-1.13433	DPH5;DPH6	Upregulated
mismatch repair (GO:0006298)	0.00310792	0.00682567	0.685164	0.999856	0.19664	-1.13536	MSH6;POL32;RFC3;MSH2;RFC1;RFC2;POL30	Upregulated
translesion synthesis (GO:0019985)	0.0661528	0.0967637	0.849117	0.999856	0.418699	-1.1371	POL2;POL30;RPO21;RAD18	Upregulated
mitochondrial tRNA modification (GO:0070900)	0.0743576	0.10242	0.593405	0.999856	0.440465	-1.14471	TRM5;NFS1	Upregulated
regulation of transcription regulatory region DNA binding (GO:2000677)	0.125135	0.157828	0.719603	0.999856	0.552245	-1.14777	GRX4;GRX3	Upregulated
chaperone-mediated protein complex assembly (GO:0051131)	0.181594	0.218637	0.811065	0.999856	0.673018	-1.14816	HSP60;PIM1	Upregulated
regulation of transposition, RNA-mediated (GO:0010525)	0.359992	0.41302	0.947227	0.999856	1.12457	-1.14895	RTT107;RTT103	Upregulated
regulation of transport (GO:0051049)	0.125135	0.157828	0.719603	0.999856	0.557896	-1.15951	RSP5;KEL1	Upregulated
nitrogen compound transport (GO:0071705)	0.353719	0.406441	0.998442	0.999856	1.12663	-1.17085	BPT1;GNP1;TDH3;YCF1;PET9	Upregulated
mitochondrial respiratory chain complex III biogenesis (GO:0097033)	0.152852	0.187012	0.76926	0.999856	0.624975	-1.17388	FMP25;CBP3	Upregulated
peptidyl-asparagine modification (GO:0018196)	0.0131922	0.0233686	0.427654	0.982044	0.271366	-1.17451	KRE5;WBP1;OST3	Upregulated
GPI anchor metabolic process (GO:0006505)	0.39908	0.442089	0.989085	0.999856	1.28207	-1.1777	CDC1;DPM1;TED1	Upregulated
positive regulation of mitochondrial translation (GO:0070131)	0.124951	0.157828	0.857909	0.999856	0.569325	-1.1841	MDM38;CBP3;PAN5	Upregulated
regulation of response to DNA damage stimulus (GO:2001020)	0.181594	0.218637	0.811065	0.999856	0.696901	-1.1889	RTT107;TUP1	Upregulated
negative regulation of small GTPase mediated signal transduction (GO:0051058)	0.152852	0.187012	0.76926	0.999856	0.633014	-1.18898	BCY1;IRA1	Upregulated
regulation of mitotic actomyosin contractile ring assembly (GO:1903499)	0.0743576	0.10242	0.593405	0.999856	0.458039	-1.19038	GLC7;RHO1	Upregulated
cellular response to alkaline pH (GO:0071469)	0.125135	0.157828	0.719603	0.999856	0.573408	-1.19175	MSN4;MSN2	Upregulated
protein targeting to peroxisome (GO:0006625)	0.016789	0.0288603	0.731751	0.999856	0.292013	-1.19346	MDH2;DJP1;GPD1;CAJ1;PEX25	Upregulated
nucleic acid-templated transcription (GO:0097659)	0.240879	0.282365	0.874903	0.999856	0.843255	-1.20034	SKN7;SGV1	Upregulated
negative regulation of mitotic cell cycle phase transition (GO:1901991)	0.152852	0.187012	0.76926	0.999856	0.641484	-1.20489	CDC55;KEL1	Upregulated
transcription-coupled nucleotide-excision repair (GO:0006283)	0.240879	0.282365	0.874903	0.999856	0.847189	-1.20594	SEN1;SUB2	Upregulated
thiamine-containing compound biosynthetic process (GO:0042724)	0.624203	0.633426	0.969155	0.999856	2.56104	-1.20697	THI20	Upregulated
intracellular sterol transport (GO:0032366)	0.557602	0.574327	0.947295	0.999856	2.07605	-1.21264	DET1	Upregulated
carbon catabolite repression of transcription from RNA polymerase II promoter (GO:0000437)	0.270892	0.314376	0.898749	0.999856	0.934482	-1.22047	TUP1;SPT6	Upregulated
oligosaccharide metabolic process (GO:0009311)	0.520002	0.542251	0.93111	0.999856	1.87176	-1.22399	AMS1	Upregulated
regulation of cell growth (GO:0001558)	0.143346	0.179153	0.881364	0.999856	0.636502	-1.2364	MKS1;SLM1;KAP123	Upregulated
carbon catabolite regulation of transcription from RNA polymerase II promoter (GO:0000429)	0.330612	0.380468	0.934255	0.999856	1.11765	-1.23702	SWI3;SWI1	Upregulated
cellular response to glucose stimulus (GO:0071333)	0.557602	0.574327	0.947295	0.999856	2.13781	-1.24871	ROD1	Upregulated
ATP transport (GO:0015867)	0.0250429	0.0411303	0.794244	0.999856	0.342664	-1.26346	HSE1;BUL1;BRO1;PET9;VPS27	Upregulated
inactivation of MAPK activity (GO:0000188)	0.557602	0.574327	0.947295	0.999856	2.16363	-1.26379	PTC2	Upregulated
endoplasmic reticulum membrane organization (GO:0090158)	0.0131922	0.0233686	0.427654	0.982044	0.292153	-1.26448	TCB3;SCS2;TCB1	Upregulated
protein polyubiquitination (GO:0000209)	0.00180131	0.00422637	0.784695	0.999856	0.200425	-1.26653	RSP5;BRE1;CDC34;MOT2;BUL2;UFD4;BUL1;UFD2;UBR1	Upregulated
spindle pole body duplication (GO:0030474)	0.388878	0.431421	0.957734	0.999856	1.35107	-1.27607	POM152;POM34	Upregulated
regulation of exit from mitosis (GO:0007096)	0.0161841	0.0280117	0.820652	0.999856	0.314097	-1.29525	CDC42;CDC55;CLA4;CDC24;KEL1;RIO1	Upregulated
N-terminal protein amino acid acetylation (GO:0006474)	0.240879	0.282365	0.874903	0.999856	0.911863	-1.298	NAT1;MDM20	Upregulated
base-excision repair, AP site formation (GO:0006285)	0.38693	0.429891	0.846206	0.999856	1.37012	-1.30094	UNG1	Upregulated
very long-chain fatty acid biosynthetic process (GO:0042761)	0.0131922	0.0233686	0.427654	0.982044	0.301882	-1.30658	TSC13;ELO3;IFA38	Upregulated
ubiquinone biosynthetic process (GO:0006744)	0.00451231	0.00941727	0.521089	0.999856	0.242076	-1.30744	COQ4;COQ1;ARH1;HFD1;COQ8	Upregulated
ER-dependent peroxisome organization (GO:0032581)	0.181594	0.218637	0.811065	0.999856	0.768333	-1.31076	RTN1;YOP1	Upregulated
cellular response to decreased oxygen levels (GO:0036294)	0.38693	0.429891	0.846206	0.999856	1.38391	-1.31404	FRD1	Upregulated
cellular response to water deprivation (GO:0042631)	0.125135	0.157828	0.719603	0.999856	0.633516	-1.31668	NTH1;TPS1	Upregulated
cofactor biosynthetic process (GO:0051188)	0.0483414	0.0734221	0.884477	0.999856	0.435001	-1.31782	NFS1;NBP35;NAR1;SSQ1;RNR4	Upregulated
regulation of ATPase activity (GO:0043462)	0.211032	0.250683	0.845967	0.999856	0.852393	-1.32611	SWA2;SQS1	Upregulated
negative regulation of cellular carbohydrate metabolic process (GO:0010677)	0.592259	0.603849	0.959679	0.999856	2.53207	-1.32632	GID8	Upregulated
regulation of mitotic nuclear division (GO:0007088)	0.0462305	0.0712799	0.93348	0.999856	0.433452	-1.33248	CDC42;CLA4;CDC24;NUP53;PSE1;RIO1	Upregulated
cellular response to salt stress (GO:0071472)	0.10749	0.140256	0.830484	0.999856	0.597471	-1.33258	RIM11;PSR2;MCK1	Upregulated
positive regulation of transcription by galactose (GO:0000411)	0.520002	0.542251	0.93111	0.999856	2.03818	-1.33281	RAS2	Upregulated
mitotic cytokinetic process (GO:1902410)	0.0617942	0.091005	0.719905	0.999856	0.479432	-1.33471	CDC11;SHS1;CHS1	Upregulated
positive regulation of endodeoxyribonuclease activity (GO:0032079)	0.38693	0.429891	0.846206	0.999856	1.40897	-1.33783	SSC1	Upregulated
regulation of cellular pH (GO:0030641)	0.0281243	0.0446854	0.560234	0.999856	0.375074	-1.33943	PFK2;PMA1;PFK1	Upregulated
lipid particle organization (GO:0034389)	0.152852	0.187012	0.76926	0.999856	0.714076	-1.34124	LOA1;PAH1	Upregulated
negative regulation of programmed cell death (GO:0043069)	0.0988237	0.129508	0.661213	0.999856	0.587753	-1.36031	BMH2;BMH1	Upregulated
proton-transporting ATP synthase complex assembly (GO:0043461)	0.240879	0.282365	0.874903	0.999856	0.956918	-1.36213	ATP12;ATP11	Upregulated
box C/D snoRNA processing (GO:0034963)	0.0150847	0.0261989	0.590494	0.999856	0.326105	-1.36771	POP1;NOP1;RPP1;RNT1	Upregulated
vacuolar transmembrane transport (GO:0034486)	0.520002	0.542251	0.93111	0.999856	2.09441	-1.36958	VHC1	Upregulated
regulation of cell proliferation (GO:0042127)	0.592259	0.603849	0.959679	0.999856	2.61719	-1.37091	CDC28	Upregulated
regulation of protein catabolic process (GO:0042176)	0.125135	0.157828	0.719603	0.999856	0.661027	-1.37386	RSP5;RPT2	Upregulated
negative regulation of chromatin silencing involved in replicative cell aging (GO:0001308)	0.38693	0.429891	0.846206	0.999856	1.44747	-1.37439	HDA1	Upregulated
positive regulation of microtubule polymerization (GO:0031116)	0.0758071	0.103754	0.761898	0.999856	0.534996	-1.38006	NAP1;SPC34;DUO1	Upregulated
tRNA gene clustering (GO:0070058)	0.125135	0.157828	0.719603	0.999856	0.668911	-1.39024	SMC4;SMC2	Upregulated
protein localization to pre-autophagosomal structure (GO:0034497)	0.143346	0.179153	0.881364	0.999856	0.7191	-1.39685	YPT6;ARL1;YPT1	Upregulated
transcription initiation from RNA polymerase III promoter (GO:0006384)	0.211032	0.250683	0.845967	0.999856	0.899462	-1.39934	TFC3;SPT15	Upregulated
iron-sulfur cluster assembly (GO:0016226)	0.113694	0.147714	0.922191	0.999856	0.644113	-1.40046	NFS1;NBP35;NAR1;SSQ1	Upregulated
regulation of spindle pole body separation (GO:0010695)	0.557602	0.574327	0.947295	0.999856	2.40358	-1.40395	CDC28	Upregulated
regulation of cellular localization (GO:0060341)	0.38693	0.429891	0.846206	0.999856	1.47945	-1.40476	BNI1	Upregulated
cell septum assembly (GO:0090529)	0.152852	0.187012	0.76926	0.999856	0.756716	-1.42133	CDC11;SHS1	Upregulated
glycerophospholipid catabolic process (GO:0046475)	0.520002	0.542251	0.93111	0.999856	2.19921	-1.43812	PGC1	Upregulated
L-phenylalanine catabolic process (GO:0006559)	0.38693	0.429891	0.846206	0.999856	1.52886	-1.45167	PDC1	Upregulated
reticulophagy (GO:0061709)	0.181594	0.218637	0.811065	0.999856	0.860984	-1.46882	VPS21;YPT1	Upregulated
disaccharide catabolic process (GO:0046352)	0.0472611	0.072499	0.794503	0.999856	0.481397	-1.46926	SNF2;SWI3;NTH1;SWI1	Upregulated
protein localization to kinetochore (GO:0034501)	0.0617942	0.091005	0.719905	0.999856	0.528348	-1.47089	NUP53;GLC7;CRM1	Upregulated
regulation of cyclin-dependent protein serine/threonine kinase activity (GO:0000079)	0.188358	0.226599	0.968199	0.999856	0.881513	-1.47161	TFB3;PTC2;CCL1;BCP1	Upregulated
mitotic DNA integrity checkpoint (GO:0044774)	0.016789	0.0288603	0.731751	0.999856	0.362031	-1.47963	POL2;MAD1;DUN1;ORC1;TOP2	Upregulated
sterol import (GO:0035376)	0.0378824	0.0586478	0.619102	0.999856	0.457053	-1.49606	CLA4;PDR12;SNQ2	Upregulated
aromatic amino acid family catabolic process (GO:0009074)	0.434948	0.468096	0.882321	0.999856	1.79954	-1.49817	PDC1	Upregulated
regulation of DNA damage checkpoint (GO:2000001)	0.0988237	0.129508	0.661213	0.999856	0.65129	-1.50736	RTT107;PSY4	Upregulated
GPI anchor biosynthetic process (GO:0006506)	0.441974	0.475319	0.992873	0.999856	1.85011	-1.51063	CDC1;DPM1;TED1	Upregulated
indolalkylamine catabolic process (GO:0046218)	0.38693	0.429891	0.846206	0.999856	1.59457	-1.51406	PDC1	Upregulated
response to acidic pH (GO:0010447)	0.0131922	0.0233686	0.427654	0.982044	0.352794	-1.52694	SLT2;RGD1;MSN4	Upregulated
triglyceride catabolic process (GO:0019433)	0.0988237	0.129508	0.661213	0.999856	0.662727	-1.53383	AYR1;TGL4	Upregulated
lipid homeostasis (GO:0055088)	0.289119	0.334758	0.969267	0.999856	1.23791	-1.53614	VPS53;OSH6;SPF1	Upregulated
autophagosome organization (GO:1905037)	0.0720647	0.10242	0.92765	0.999856	0.585107	-1.53894	SEC7;HRR25;VPS30;SEC18;YPT1	Upregulated
biotin biosynthetic process (GO:0009102)	0.434948	0.468096	0.882321	0.999856	1.85234	-1.54213	BIO4	Upregulated
sister chromatid biorientation (GO:0031134)	0.0491263	0.0734221	0.672353	0.999856	0.512163	-1.54333	CDC48;RTS1;CDC28	Upregulated
autophagy of mitochondrion (GO:0000422)	0.58048	0.597076	0.998465	0.999856	2.84096	-1.5452	SNX4;WHI2;STT4	Upregulated
intronic box C/D snoRNA processing (GO:0034965)	0.181594	0.218637	0.811065	0.999856	0.906694	-1.5468	POP1;RPP1	Upregulated
positive regulation of cellular amide metabolic process (GO:0034250)	0.0131922	0.0233686	0.427654	0.982044	0.358087	-1.54985	DOM34;RLI1;HBS1	Upregulated
mitotic actomyosin contractile ring assembly (GO:1903475)	0.479207	0.505291	0.909959	0.999856	2.1085	-1.55106	BNI1	Upregulated
negative regulation of autophagy (GO:0010507)	0.330612	0.380468	0.934255	0.999856	1.40776	-1.55813	XRN1;PHO85	Upregulated
RNA processing (GO:0006396)	0.0720647	0.10242	0.92765	0.999856	0.594008	-1.56235	MRPL3;MSS116;MTF2;SPT5;RNT1	Upregulated
cellular iron ion homeostasis (GO:0006879)	0.259675	0.303691	0.994957	0.999856	1.16063	-1.5649	NFS1;ARH1;GRX4;GRX3;GGC1	Upregulated
manganese ion transport (GO:0006828)	0.479207	0.505291	0.909959	0.999856	2.13406	-1.56986	PMR1	Upregulated
spindle assembly checkpoint (GO:0071173)	0.0483414	0.0734221	0.884477	0.999856	0.518299	-1.57017	MAD1;MLP2;GLC7;PPH21;TPD3	Upregulated
chromatin organization involved in negative regulation of transcription (GO:0097549)	0.479207	0.505291	0.909959	0.999856	2.14114	-1.57507	POL2	Upregulated
mitotic DNA replication (GO:1902969)	0.0491263	0.0734221	0.672353	0.999856	0.530033	-1.59718	POL1;CDC9;MCM3	Upregulated
positive regulation of phospholipid biosynthetic process (GO:0071073)	0.0378824	0.0586478	0.619102	0.999856	0.488734	-1.59976	CSR1;PDR17;PHO85	Upregulated
negative regulation of cellular biosynthetic process (GO:0031327)	0.0661528	0.0967637	0.849117	0.999856	0.59439	-1.61424	CSR1;YPK1;GID8;OPI1	Upregulated
activation of GTPase activity (GO:0090630)	0.0111224	0.0207736	0.537934	0.999856	0.358826	-1.61429	MDR1;GYP5;GYP6;MRS6	Upregulated
purine nucleoside bisphosphate biosynthetic process (GO:0034033)	0.125135	0.157828	0.719603	0.999856	0.77805	-1.61707	CAB2;SIS2	Upregulated
inorganic anion transmembrane transport (GO:0098661)	0.270892	0.314376	0.898749	0.999856	1.24215	-1.62229	VHC1;MIR1	Upregulated
regulation of meiotic DNA double-strand break formation (GO:1903341)	0.479207	0.505291	0.909959	0.999856	2.21149	-1.62682	SMC2	Upregulated
cellular response to organic substance (GO:0071310)	0.0910727	0.123197	0.798628	0.999856	0.680711	-1.63105	SLT2;YPK1;MSN2	Upregulated
negative regulation of intracellular signal transduction (GO:1902532)	0.0910727	0.123197	0.798628	0.999856	0.681829	-1.63373	SAC7;HSF1;PHO85	Upregulated
metallo-sulfur cluster assembly (GO:0031163)	0.113694	0.147714	0.922191	0.999856	0.754127	-1.63966	NFS1;NBP35;NAR1;SSQ1	Upregulated
glyoxylate metabolic process (GO:0046487)	0.434948	0.468096	0.882321	0.999856	1.97058	-1.64056	GOR1	Upregulated
protein complex assembly (GO:0006461)	0.0617942	0.091005	0.719905	0.999856	0.590118	-1.64286	ATP4;YTA12;AFG3	Upregulated
C4-dicarboxylate transport (GO:0015740)	0.434948	0.468096	0.882321	0.999856	1.97384	-1.64328	ODC2	Upregulated
lipid phosphorylation (GO:0046834)	0.0198909	0.0328113	0.496149	0.999856	0.420158	-1.64596	STT4;FAB1;PIK1	Upregulated
positive regulation of sequence-specific DNA binding transcription factor activity (GO:0051091)	0.125135	0.157828	0.719603	0.999856	0.793419	-1.64901	SLT2;RPT6	Upregulated
negative regulation of transposition, RNA-mediated (GO:0010526)	0.152852	0.187012	0.76926	0.999856	0.878223	-1.64955	RTT107;RTT103	Upregulated
positive regulation of cell cycle process (GO:0090068)	0.311169	0.359187	0.974916	0.999856	1.41988	-1.6576	SPC34;DUO1;CDC28	Upregulated
error-prone translesion synthesis (GO:0042276)	0.270892	0.314376	0.898749	0.999856	1.26999	-1.65864	POL2;RAD18	Upregulated
error-free translesion synthesis (GO:0070987)	0.270892	0.314376	0.898749	0.999856	1.2786	-1.66989	POL30;RAD18	Upregulated
inositolphosphoceramide metabolic process (GO:0006673)	0.434948	0.468096	0.882321	0.999856	2.01952	-1.68131	SCS7	Upregulated
DNA packaging (GO:0006323)	0.143346	0.179153	0.881364	0.999856	0.867817	-1.68573	TOF2;SMC4;SMC2	Upregulated
regulation of DNA biosynthetic process (GO:2000278)	0.434948	0.468096	0.882321	0.999856	2.0355	-1.69461	CDC28	Upregulated
regulation of mitotic recombination (GO:0000019)	0.152852	0.187012	0.76926	0.999856	0.908504	-1.70643	TOP2;TOP1	Upregulated
spindle assembly (GO:0051225)	0.0910727	0.123197	0.798628	0.999856	0.713632	-1.70993	TUB4;CDC28;BCP1	Upregulated
organic cation transport (GO:0015695)	0.211032	0.250683	0.845967	0.999856	1.09959	-1.71069	FAA1;FAA4	Upregulated
RNA polymerase III transcriptional preinitiation complex assembly (GO:0070898)	0.434948	0.468096	0.882321	0.999856	2.06574	-1.71978	SPT15	Upregulated
nucleobase metabolic process (GO:0009112)	0.0743576	0.10242	0.593405	0.999856	0.662452	-1.72163	ADO1;ADE2	Upregulated
peroxisome inheritance (GO:0045033)	0.38693	0.429891	0.846206	0.999856	1.81431	-1.7227	MYO2	Upregulated
mitochondrial ATP synthesis coupled electron transport (GO:0042775)	0.0339023	0.0534722	0.947499	0.999856	0.510292	-1.72697	MAS1;COR1;QCR2;NDI1;CYC1;CYT1;SDH1	Upregulated
mitochondrial RNA metabolic process (GO:0000959)	0.444776	0.477313	0.973053	0.999856	2.13607	-1.73061	TRZ1;MSS116	Upregulated
regulation of sterol import by regulation of transcription from RNA polymerase II promoter (GO:0035968)	0.479207	0.505291	0.909959	0.999856	2.35636	-1.73339	CLA4	Upregulated
microtubule cytoskeleton organization involved in mitosis (GO:1902850)	0.547279	0.569909	0.989264	0.999856	2.87727	-1.73441	TUB4;BCP1	Upregulated
regulation of small GTPase mediated signal transduction (GO:0051056)	0.434948	0.468096	0.882321	0.999856	2.08487	-1.73571	MRPL35	Upregulated
DNA replication-dependent nucleosome assembly (GO:0006335)	0.0743576	0.10242	0.593405	0.999856	0.674222	-1.75221	RLF2;ASF1	Upregulated
endosome organization (GO:0007032)	0.143346	0.179153	0.881364	0.999856	0.904883	-1.75773	VPS4;BRO1;PEP5	Upregulated
negative regulation of Arp2/3 complex-mediated actin nucleation (GO:0034316)	0.434948	0.468096	0.882321	0.999856	2.11384	-1.75983	SLA1	Upregulated
positive regulation of actin cytoskeleton reorganization (GO:2000251)	0.0198909	0.0328113	0.496149	0.999856	0.456408	-1.78798	PEA2;BUD6;BNI1	Upregulated
regulation of autophagy (GO:0010506)	0.522923	0.544922	0.986457	0.999856	2.76096	-1.78998	HOG1;TPK1	Upregulated
cell wall (1->3)-beta-D-glucan metabolic process (GO:0034407)	0.0743576	0.10242	0.593405	0.999856	0.693315	-1.80184	GAS1;GAS3	Upregulated
iron ion homeostasis (GO:0055072)	0.29051	0.336111	0.996571	0.999856	1.45938	-1.80396	NFS1;ARH1;GRX4;GRX3;GGC1	Upregulated
regulation of protein dephosphorylation (GO:0035304)	0.240879	0.282365	0.874903	0.999856	1.27	-1.8078	GIP3;GLC7	Upregulated
glycolipid biosynthetic process (GO:0009247)	0.420661	0.465314	0.991173	0.999856	2.09439	-1.81359	CDC1;DPM1;TED1	Upregulated
mRNA metabolic process (GO:0016071)	0.0768598	0.10491	0.871472	0.999856	0.709491	-1.82039	DIS3;MTF2;SPT5;SSD1	Upregulated
protein localization to chromosome, centromeric region (GO:0071459)	0.203021	0.243851	0.93236	0.999856	1.14309	-1.82259	NUP53;GLC7;CRM1	Upregulated
inorganic cation transmembrane transport (GO:0098662)	0.00899684	0.0172735	0.739083	0.999856	0.38695	-1.82288	YLH47;MDM38;PMA1;PMR1;ZRT3;ZRT1	Upregulated
establishment of mitotic spindle orientation (GO:0000132)	0.00614522	0.0124804	0.568941	0.999856	0.3591	-1.82857	SNF1;ACT1;BNI1;MYO2;BCP1	Upregulated
chromosome condensation (GO:0030261)	0.01344	0.0236689	0.695733	0.999856	0.432372	-1.86331	TOF2;PDS5;TOP1;SMC4;SMC2	Upregulated
telomere maintenance via telomerase (GO:0007004)	0.143346	0.179153	0.881364	0.999856	0.966369	-1.87717	RFA1;RFA2;HEK2	Upregulated
transcription from RNA polymerase III promoter (GO:0006383)	0.00391627	0.00823016	0.716982	0.999856	0.344143	-1.90745	TFC3;RET1;RPO31;RPB5;RPC82;TFC1;RPC40	Upregulated
mitochondrial respiratory chain complex IV assembly (GO:0033617)	0.224048	0.265727	0.944252	0.999856	1.28747	-1.92592	TIM21;RCF1;COX20	Upregulated
regulation of protein serine/threonine kinase activity (GO:0071900)	0.0635588	0.0933307	0.915181	0.999856	0.701986	-1.93453	PKH2;PKH1;TFB3;PTC2;BCP1	Upregulated
stress granule assembly (GO:0034063)	0.0111224	0.0207736	0.537934	0.999856	0.432444	-1.94548	PUB1;THP2;MFT1;DHH1	Upregulated
carboxylic acid transport (GO:0046942)	0.444776	0.477313	0.973053	0.999856	2.43152	-1.96998	GNP1;YHM2	Upregulated
positive regulation of phosphorylation (GO:0042327)	0.0378824	0.0586478	0.619102	0.999856	0.60279	-1.97309	VAC14;PGK1;ASC1	Upregulated
positive regulation of chromosome segregation (GO:0051984)	0.240879	0.282365	0.874903	0.999856	1.39424	-1.98464	SPC34;DUO1	Upregulated
pyrimidine deoxyribonucleoside monophosphate biosynthetic process (GO:0009177)	0.0743576	0.10242	0.593405	0.999856	0.769508	-1.99985	CDC21;YGL101W	Upregulated
regulation of cytoplasmic translation (GO:2000765)	0.0198909	0.0328113	0.496149	0.999856	0.512484	-2.00765	TMA108;TUB4;PSK2	Upregulated
regulation of gluconeogenesis (GO:0006111)	0.05628	0.0836999	0.823553	0.999856	0.698495	-2.00986	SNF1;GID8;TSA1;SNF4	Upregulated
mitotic cell cycle phase transition (GO:0044772)	0.00840285	0.016257	0.954427	0.999856	0.425096	-2.03161	CDC10;CDC34;SHS1;CDC28;PIN4;PPH21;STH1;SAP190;KAP104;ZPR1	Upregulated
transsulfuration (GO:0019346)	0.0198909	0.0328113	0.496149	0.999856	0.52418	-2.05347	YHR112C;CYS4;CYS3	Upregulated
DNA-templated transcription, initiation (GO:0006352)	0.333261	0.383224	0.97957	0.999856	1.87165	-2.05663	TFC3;SRB4;TAF2	Upregulated
mitotic spindle organization (GO:0007052)	0.135	0.169704	0.973621	0.999856	1.03287	-2.06831	TUB4;CDC48;CDC28;BCP1;NPL4	Upregulated
signal peptide processing (GO:0006465)	0.0281243	0.0446854	0.560234	0.999856	0.582033	-2.07851	SPC2;YTA12;AFG3	Upregulated
formin-nucleated actin cable assembly (GO:0070649)	0.0743576	0.10242	0.593405	0.999856	0.803598	-2.08845	SAC6;BNI1	Upregulated
ubiquitin-dependent protein catabolic process via the multivesicular body sorting pathway (GO:0043162)	0.123178	0.157828	0.968603	0.999856	0.999218	-2.09249	GGA2;RSP5;GGA1;UBP2;BRO1	Upregulated
cell cycle G1/S phase transition (GO:0044843)	0.0635588	0.0933307	0.915181	0.999856	0.767542	-2.11518	CDC34;SHS1;CDC28;PPH21;SAP190	Upregulated
telomere maintenance via recombination (GO:0000722)	0.111862	0.145836	0.962715	0.999856	0.984112	-2.15569	RFA1;BRE1;RFA2;CGI121;INO80	Upregulated
protein localization to chromosome (GO:0034502)	0.0768598	0.10491	0.871472	0.999856	0.840774	-2.15724	TOF2;TFC3;RTS1;RPD3	Upregulated
negative regulation of chromatin silencing at rDNA (GO:0061188)	0.0281243	0.0446854	0.560234	0.999856	0.60425	-2.15785	CTI6;RPD3;SIN3	Upregulated
regulation of meiotic nuclear division (GO:0040020)	0.359992	0.41302	0.947227	0.999856	2.1541	-2.20079	UME1;RCK2	Upregulated
primary alcohol metabolic process (GO:0034308)	0.0150847	0.0261989	0.590494	0.999856	0.530871	-2.22651	ADH3;ADH1;ALD4;PDC1	Upregulated
regulation of phosphatase activity (GO:0010921)	0.0198909	0.0328113	0.496149	0.999856	0.572015	-2.24087	GIP3;OSH3;KES1	Upregulated
establishment of mitochondrion localization (GO:0051654)	0.0743576	0.10242	0.593405	0.999856	0.867629	-2.25485	ARP2;JSN1	Upregulated
protein insertion into mitochondrial membrane (GO:0051204)	0.152852	0.187012	0.76926	0.999856	1.20648	-2.26611	YLH47;MDM38	Upregulated
establishment of protein localization to mitochondrial membrane (GO:0090151)	0.267191	0.312239	0.962429	0.999856	1.71821	-2.26768	TIM54;DJP1;TOM70	Upregulated
protein transport to vacuole involved in ubiquitin-dependent protein catabolic process via the multivesicular body sorting pathway (GO:0043328)	0.113694	0.147714	0.922191	0.999856	1.04699	-2.2764	GGA2;RSP5;GGA1;BRO1	Upregulated
organic substance transport (GO:0071702)	0.39908	0.442089	0.989085	0.999856	2.49638	-2.29316	PDR12;TDH3;PET9	Upregulated
regulation of transcription from RNA polymerase III promoter (GO:0006359)	0.0491263	0.0734221	0.672353	0.999856	0.763427	-2.30048	CKA2;CKA1;CKB2	Upregulated
mitotic recombination (GO:0006312)	0.126646	0.159601	0.987018	0.999856	1.11818	-2.31056	RFA1;BRE1;RFA2;CGI121;MSH2;INO80	Upregulated
formin-nucleated actin cable organization (GO:0110009)	0.0743576	0.10242	0.593405	0.999856	0.890073	-2.31318	SAC6;BNI1	Upregulated
ATP synthesis coupled proton transport (GO:0015986)	0.016789	0.0288603	0.731751	0.999856	0.566658	-2.31595	ATP3;ATP4;ATP1;ATP2;CYT1	Upregulated
positive regulation of phosphatidylcholine biosynthetic process (GO:2001247)	0.0743576	0.10242	0.593405	0.999856	0.892963	-2.3207	CSR1;PDR17	Upregulated
mitotic spindle assembly (GO:0090307)	0.181594	0.218637	0.811065	0.999856	1.36461	-2.328	CDC28;BCP1	Upregulated
cellular manganese ion homeostasis (GO:0030026)	0.181594	0.218637	0.811065	0.999856	1.38413	-2.3613	PMR1;SPF1	Upregulated
mitotic DNA replication checkpoint (GO:0033314)	0.211032	0.250683	0.845967	0.999856	1.52391	-2.37083	POL2;ORC1	Upregulated
cellular response to nitrogen levels (GO:0043562)	0.240879	0.282365	0.874903	0.999856	1.66778	-2.37402	SNF1;VPS30	Upregulated
protein-DNA complex assembly (GO:0065004)	0.12742	0.160309	0.934589	0.999856	1.15498	-2.37956	NAP1;RLF2;SPT6;SPT16	Upregulated
ncRNA metabolic process (GO:0034660)	0.211032	0.250683	0.845967	0.999856	1.54784	-2.40805	PAP2;MTR4	Upregulated
maintenance of translational fidelity (GO:1990145)	0.0743576	0.10242	0.593405	0.999856	0.92769	-2.41095	RPL3;EFT1	Upregulated
nuclear polyadenylation-dependent snRNA catabolic process (GO:0071037)	0.0743576	0.10242	0.593405	0.999856	0.928844	-2.41394	RRP6;PAP2	Upregulated
manganese ion homeostasis (GO:0055071)	0.181594	0.218637	0.811065	0.999856	1.42137	-2.42483	PMR1;SPF1	Upregulated
inositol lipid-mediated signaling (GO:0048017)	0.0281243	0.0446854	0.560234	0.999856	0.679163	-2.42537	STT4;GPA1;PIK1	Upregulated
protein localization to chromatin (GO:0071168)	0.0988237	0.129508	0.661213	0.999856	1.05015	-2.4305	TFC3;RAP1	Upregulated
tRNA splicing, via endonucleolytic cleavage and ligation (GO:0006388)	0.211032	0.250683	0.845967	0.999856	1.56883	-2.4407	TRL1;TPT1	Upregulated
sucrose catabolic process (GO:0005987)	0.0281243	0.0446854	0.560234	0.999856	0.685041	-2.44636	SNF2;SWI3;SWI1	Upregulated
glycerol metabolic process (GO:0006071)	0.0491263	0.0734221	0.672353	0.999856	0.812998	-2.44986	GPD2;DAK1;GUT2	Upregulated
regulation of histone acetylation (GO:0035065)	0.152852	0.187012	0.76926	0.999856	1.31755	-2.47473	ASF1;SET2	Upregulated
regulation of mitotic cell cycle (GO:0007346)	0.0532723	0.0794615	0.971428	0.999856	0.844552	-2.47651	CLA4;SIS2;SMI1;NUP53;CDC28;GLC7;PSE1	Upregulated
respiratory chain complex III assembly (GO:0017062)	0.152852	0.187012	0.76926	0.999856	1.31857	-2.47665	FMP25;CBP3	Upregulated
mRNA splice site selection (GO:0006376)	0.270892	0.314376	0.898749	0.999856	1.89683	-2.47733	PRP28;PRP8	Upregulated
positive regulation of protein modification process (GO:0031401)	0.0281243	0.0446854	0.560234	0.999856	0.701705	-2.50588	GLC7;MCX1;ASC1	Upregulated
transcription initiation from RNA polymerase II promoter (GO:0006367)	0.00252912	0.0056147	0.877661	0.999856	0.419082	-2.50606	MED2;TAF12;GAL11;SRB4;SRB2;TAF5;SPT15;TAF4;TAF2;TAF1	Upregulated
synaptonemal complex assembly (GO:0007130)	0.0318243	0.0502997	0.724999	0.999856	0.727641	-2.50856	CDC28;SMC3;SMC4;SMC2	Upregulated
mitotic spindle checkpoint (GO:0071174)	0.0339023	0.0534722	0.947499	0.999856	0.743229	-2.51529	MAD1;MLP2;RTS1;GLC7;BMH1;PPH21;TPD3	Upregulated
positive regulation of autophagy (GO:0010508)	0.0299946	0.047557	0.820904	0.999856	0.71769	-2.51675	SNF1;GCN2;RPD3;PHO85;GCN1	Upregulated
mRNA cis splicing, via spliceosome (GO:0045292)	0.211032	0.250683	0.845967	0.999856	1.6233	-2.52544	PRP28;SNU66	Upregulated
nucleolus organization (GO:0007000)	0.0988237	0.129508	0.661213	0.999856	1.09795	-2.54112	TOF2;RPD3	Upregulated
zinc II ion transmembrane transport (GO:0071577)	0.0743576	0.10242	0.593405	0.999856	0.977953	-2.54157	ZRT3;ZRT1	Upregulated
actomyosin contractile ring assembly (GO:0000915)	0.0150847	0.0261989	0.590494	0.999856	0.607021	-2.54589	CDC11;SHS1;MYO1;BNI1	Upregulated
barrier septum assembly (GO:0000917)	0.0491263	0.0734221	0.672353	0.999856	0.847666	-2.55432	CDC11;SHS1;CHS1	Upregulated
positive regulation of protein ubiquitination (GO:0031398)	0.0988237	0.129508	0.661213	0.999856	1.10761	-2.56348	RUP1;UFD2	Upregulated
sucrose metabolic process (GO:0005985)	0.0281243	0.0446854	0.560234	0.999856	0.720772	-2.57396	SNF2;SWI3;SWI1	Upregulated
regulation of formin-nucleated actin cable assembly (GO:0090337)	0.0617942	0.091005	0.719905	0.999856	0.925488	-2.57651	BUD6;KEL1;RHO3	Upregulated
meiotic sister chromatid segregation (GO:0045144)	0.240879	0.282365	0.874903	0.999856	1.82118	-2.59238	RDH54;SMC3	Upregulated
rRNA modification (GO:0000154)	0.0198333	0.0328113	0.639346	0.999856	0.665123	-2.60754	NOP56;CBF5;NOP1;DIM1	Upregulated
nucleobase-containing compound biosynthetic process (GO:0034654)	0.0988237	0.129508	0.661213	0.999856	1.1317	-2.61923	AAH1;FUR1	Upregulated
ubiquitin-dependent catabolism of misfolded proteins by nucleus-associated proteasome (GO:0071630)	0.0743576	0.10242	0.593405	0.999856	1.00929	-2.62301	CDC48;VMS1	Upregulated
regulation of cellular ketone metabolic process by positive regulation of transcription from RNA polymerase II promoter (GO:0072366)	0.0743576	0.10242	0.593405	0.999856	1.01017	-2.62529	ADR1;MGA2	Upregulated
snoRNA transcription (GO:0009302)	0.0743576	0.10242	0.593405	0.999856	1.01731	-2.64385	CTR9;PAF1	Upregulated
exit from mitosis (GO:0010458)	0.0491263	0.0734221	0.672353	0.999856	0.878042	-2.64586	CDC10;SHS1;KAP104	Upregulated
positive regulation of DNA-templated transcription, initiation (GO:2000144)	0.0743576	0.10242	0.593405	0.999856	1.01879	-2.64771	XRN1;SPT16	Upregulated
snRNA catabolic process (GO:0016076)	0.0743576	0.10242	0.593405	0.999856	1.02398	-2.66118	RRP6;PAP2	Upregulated
negative regulation of exit from mitosis (GO:0001100)	0.0883746	0.120409	0.89091	0.999856	1.0984	-2.6649	CDC55;RTS1;BMH1;KEL1	Upregulated
positive regulation of attachment of spindle microtubules to kinetochore (GO:0051987)	0.240879	0.282365	0.874903	0.999856	1.87613	-2.6706	SPC34;DUO1	Upregulated
positive regulation of macromolecule biosynthetic process (GO:0010557)	0.0378824	0.0586478	0.619102	0.999856	0.817233	-2.67502	DOM34;RLI1;HBS1	Upregulated
plasma membrane organization (GO:0007009)	0.152852	0.187012	0.76926	0.999856	1.4261	-2.67863	RVS161;RVS167	Upregulated
pyrimidine nucleobase metabolic process (GO:0006206)	0.0743576	0.10242	0.593405	0.999856	1.03509	-2.69006	URA8;URA7	Upregulated
dicarboxylic acid transport (GO:0006835)	0.0281243	0.0446854	0.560234	0.999856	0.754287	-2.69365	BPT1;YCF1;YHM2	Upregulated
TOR signaling (GO:0031929)	0.289119	0.334758	0.969267	0.999856	2.17541	-2.6995	SLM1;SAP190;TAP42	Upregulated
regulation of cellular biosynthetic process (GO:0031326)	0.181594	0.218637	0.811065	0.999856	1.58368	-2.70173	RSP5;GIS1	Upregulated
protein import into mitochondrial inner membrane (GO:0045039)	0.270892	0.314376	0.898749	0.999856	2.07899	-2.71524	TIM54;TOM70	Upregulated
positive regulation of peptidyl-lysine acetylation (GO:2000758)	0.152852	0.187012	0.76926	0.999856	1.45111	-2.7256	ASF1;SET2	Upregulated
rRNA pseudouridine synthesis (GO:0031118)	0.125135	0.157828	0.719603	0.999856	1.31525	-2.73356	CBF5;PUS7	Upregulated
mitochondrial proton-transporting ATP synthase complex assembly (GO:0033615)	0.240879	0.282365	0.874903	0.999856	1.94456	-2.768	ATP12;ATP11	Upregulated
intronic snoRNA processing (GO:0031070)	0.181594	0.218637	0.811065	0.999856	1.62345	-2.76957	POP1;RPP1	Upregulated
RNA splicing, via endonucleolytic cleavage and ligation (GO:0000394)	0.125135	0.157828	0.719603	0.999856	1.33291	-2.77028	TRL1;TPT1	Upregulated
regulation of phosphate transport (GO:0010966)	0.0743576	0.10242	0.593405	0.999856	1.06717	-2.77344	PHO91;PHO86	Upregulated
positive regulation of protein metabolic process (GO:0051247)	0.0988237	0.129508	0.661213	0.999856	1.20025	-2.77789	RSP5;RPT2	Upregulated
positive regulation of phosphatase activity (GO:0010922)	0.0743576	0.10242	0.593405	0.999856	1.07488	-2.79347	OSH3;KES1	Upregulated
age-dependent response to oxidative stress involved in chronological cell aging (GO:0001324)	0.0988237	0.129508	0.661213	0.999856	1.21287	-2.80709	MSN4;MSN2	Upregulated
zinc II ion transport (GO:0006829)	0.181594	0.218637	0.811065	0.999856	1.64658	-2.80904	ZRT3;ZRT1	Upregulated
vacuolar proton-transporting V-type ATPase complex assembly (GO:0070072)	0.0743576	0.10242	0.593405	0.999856	1.08431	-2.81799	PFK2;VPH2	Upregulated
mitochondrial respiratory chain complex assembly (GO:0033108)	0.0891512	0.121358	0.974393	0.999856	1.17255	-2.83454	FMP25;IMP2;TIM21;RCF1;CBP3;COX20	Upregulated
response to metal ion (GO:0010038)	0.00815236	0.0157926	0.614187	0.999856	0.589666	-2.83597	YAP1;AHP1;GET3;YCF1;PRX1	Upregulated
glucose import (GO:0046323)	0.256512	0.300224	0.985099	0.999856	2.08613	-2.83835	HXK1;HXK2;ITR1;GLK1	Upregulated
peptidyl-diphthamide biosynthetic process from peptidyl-histidine (GO:0017183)	0.125135	0.157828	0.719603	0.999856	1.36887	-2.84501	DPH5;DPH6	Upregulated
hyperosmotic response (GO:0006972)	0.0617942	0.091005	0.719905	0.999856	1.02256	-2.84674	HOG1;MET22;SGD1	Upregulated
DNA replication-independent nucleosome assembly (GO:0006336)	0.0988237	0.129508	0.661213	0.999856	1.2328	-2.85321	HIR1;ASF1	Upregulated
regulation of telomere maintenance via telomerase (GO:0032210)	0.211032	0.250683	0.845967	0.999856	1.83642	-2.85701	HSP82;CDC28	Upregulated
galactose catabolic process (GO:0019388)	0.0378824	0.0586478	0.619102	0.999856	0.883107	-2.89065	GRE3;PGM2;PGM1	Upregulated
cellular transition metal ion homeostasis (GO:0046916)	0.180032	0.218637	0.999207	0.999856	1.68872	-2.89552	NFS1;ARH1;GRX4;GRX3;PMR1;ZRT3;SPF1;GGC1	Upregulated
protein-cofactor linkage (GO:0018065)	0.181594	0.218637	0.811065	0.999856	1.70121	-2.90223	LIP5;GCV3	Upregulated
transmembrane transport (GO:0055085)	0.00181785	0.00425855	0.998065	0.999856	0.462094	-2.91586	VMA2;ITR1;PMA1;VHC1;GNP1;PMC1;SPF1;GGC1;YBT1;PDR5;BPT1;FLC1;FLC2;PDR12;ADP1;SNQ2;YCF1;ENA5;PET9	Upregulated
termination of RNA polymerase I transcription (GO:0006363)	0.0988237	0.129508	0.661213	0.999856	1.26213	-2.92108	ISW1;CHD1	Upregulated
mitotic metaphase plate congression (GO:0007080)	0.152852	0.187012	0.76926	0.999856	1.55533	-2.92135	MAD1;SEH1	Upregulated
negative regulation of transcription by glucose (GO:0045014)	0.211032	0.250683	0.845967	0.999856	1.88346	-2.93019	TUP1;SPT6	Upregulated
spliceosomal complex assembly (GO:0000245)	0.203021	0.243851	0.93236	0.999856	1.8408	-2.93505	PRP11;HSH155;CUS1	Upregulated
coenzyme A biosynthetic process (GO:0015937)	0.125135	0.157828	0.719603	0.999856	1.41224	-2.93515	CAB2;SIS2	Upregulated
histone H3 acetylation (GO:0043966)	0.125135	0.157828	0.719603	0.999856	1.42104	-2.95343	TAF12;ELP4	Upregulated
protein autoubiquitination (GO:0051865)	0.125135	0.157828	0.719603	0.999856	1.42123	-2.95383	RSP5;CDC34	Upregulated
tRNA aminoacylation for mitochondrial protein translation (GO:0070127)	0.0254045	0.0414986	0.684217	0.999856	0.804426	-2.95452	MSW1;ALA1;MST1;GRS1	Upregulated
positive regulation of TOR signaling (GO:0032008)	0.211032	0.250683	0.845967	0.999856	1.8993	-2.95482	SEC13;SEH1	Upregulated
cellular potassium ion homeostasis (GO:0030007)	0.0988237	0.129508	0.661213	0.999856	1.28812	-2.98126	TRK1;MDM38	Upregulated
regulation of vesicle fusion (GO:0031338)	0.125135	0.157828	0.719603	0.999856	1.44915	-3.01186	SEC1;PEP5	Upregulated
regulation of SNARE complex assembly (GO:0035542)	0.0378824	0.0586478	0.619102	0.999856	0.923946	-3.02433	SLY1;VPS45;PEP5	Upregulated
glucose transport (GO:0015758)	0.27429	0.318075	0.987732	0.999856	2.34077	-3.02796	HXK1;HXK2;ITR1;GLK1	Upregulated
mitotic spindle assembly checkpoint (GO:0007094)	0.0483414	0.0734221	0.884477	0.999856	1.00346	-3.03996	MAD1;MLP2;GLC7;PPH21;TPD3	Upregulated
ribosomal small subunit assembly (GO:0000028)	0.0227303	0.0373727	0.862794	0.999856	0.806836	-3.05311	RRP7;RRP5;MRD1;RPS5;RSM7;RPS0A	Upregulated
cellular divalent inorganic cation homeostasis (GO:0072503)	0.0161841	0.0280117	0.820652	0.999856	0.743589	-3.06635	VMA2;PGM2;PMR1;ZRT3;PMC1;SPF1	Upregulated
cellular monovalent inorganic cation homeostasis (GO:0030004)	0.0491263	0.0734221	0.672353	0.999856	1.01868	-3.06965	PPZ1;TRK1;MDM38	Upregulated
positive regulation of gluconeogenesis (GO:0045722)	0.125135	0.157828	0.719603	0.999856	1.48381	-3.0839	SNF1;SNF4	Upregulated
regulation of transcription involved in G2/M transition of mitotic cell cycle (GO:0000117)	0.0988237	0.129508	0.661213	0.999856	1.34071	-3.10296	RPD3;SIN3	Upregulated
negative regulation of protein phosphorylation (GO:0001933)	0.0617942	0.091005	0.719905	0.999856	1.11931	-3.1161	RAT1;LSP1;PIL1	Upregulated
synaptonemal complex organization (GO:0070193)	0.0661528	0.0967637	0.849117	0.999856	1.15754	-3.14364	CDC28;SMC3;SMC4;SMC2	Upregulated
double-strand break repair via homologous recombination (GO:0000724)	0.0103111	0.0197716	0.978814	0.999856	0.688124	-3.14785	CTF4;POL32;RFA1;BRE1;RFA2;RSC2;MCM3;MCM4;CTF18;MCM6;SMC3	Upregulated
regulation of attachment of spindle microtubules to kinetochore (GO:0051988)	0.240879	0.282365	0.874903	0.999856	2.2248	-3.16691	SPC34;DUO1	Upregulated
regulation of phosphorylation (GO:0042325)	0.152852	0.187012	0.76926	0.999856	1.68952	-3.1734	ASF1;YPT1	Upregulated
early endosome to Golgi transport (GO:0034498)	0.0617942	0.091005	0.719905	0.999856	1.15812	-3.22414	YPT31;SNX4;YPT1	Upregulated
spliceosomal snRNP assembly (GO:0000387)	0.124951	0.157828	0.857909	0.999856	1.55147	-3.2268	NAB6;SNU114;PRP8	Upregulated
negative regulation of mitotic nuclear division (GO:0045839)	0.152852	0.187012	0.76926	0.999856	1.71795	-3.22681	CDC55;KEL1	Upregulated
peptidyl-lysine trimethylation (GO:0018023)	0.0491263	0.0734221	0.672353	0.999856	1.08626	-3.2733	EFM1;EFM5;RKM1	Upregulated
mitochondrial respiratory chain complex IV biogenesis (GO:0097034)	0.224048	0.265727	0.944252	0.999856	2.20759	-3.30233	TIM21;RCF1;COX20	Upregulated
regulation of organelle organization (GO:0033043)	0.0758071	0.103754	0.761898	0.999856	1.29023	-3.32824	SEC12;SEC23;SAR1	Upregulated
establishment of mitotic spindle localization (GO:0040001)	0.01344	0.0236689	0.695733	0.999856	0.776845	-3.34783	SNF1;ACT1;BNI1;MYO2;BCP1	Upregulated
peptidyl-lysine modification (GO:0018205)	0.041633	0.0642569	0.865828	0.999856	1.0537	-3.34957	LIP5;AOS1;EFM2;GCV3;UBA2	Upregulated
ATP biosynthetic process (GO:0006754)	0.0472611	0.072499	0.794503	0.999856	1.10414	-3.3699	ATP3;ATP4;ATP1;ATP2	Upregulated
regulation of transcription from RNA polymerase II promoter by glucose (GO:0000430)	0.0758071	0.103754	0.761898	0.999856	1.31248	-3.38564	STB3;TUP1;SPT6	Upregulated
positive regulation of protein phosphorylation (GO:0001934)	0.0661528	0.0967637	0.849117	0.999856	1.24719	-3.38711	CDC11;CDC12;CCL1;ASC1	Upregulated
double-strand break repair via break-induced replication (GO:0000727)	0.0556498	0.0829259	0.900859	0.999856	1.1822	-3.41499	CTF4;POL32;MCM3;MCM4;MCM6	Upregulated
mitotic G2/M transition checkpoint (GO:0044818)	0.0254045	0.0414986	0.684217	0.999856	0.933063	-3.42698	MSH6;POL2;CDC55;ORC1	Upregulated
regulation of transcription from RNA polymerase II promoter by pheromones (GO:0046019)	0.10749	0.140256	0.830484	0.999856	1.54938	-3.45569	ISW2;ITC1;PLP2	Upregulated
regulation of mitochondrial translation (GO:0070129)	0.143346	0.179153	0.881364	0.999856	1.7878	-3.47279	MDM38;CBP3;PAN5	Upregulated
ATP export (GO:1904669)	0.0472611	0.072499	0.794503	0.999856	1.13997	-3.47926	HSE1;BUL1;BRO1;VPS27	Upregulated
positive regulation of protein kinase activity (GO:0045860)	0.0635588	0.0933307	0.915181	0.999856	1.28538	-3.54224	PKH2;PKH1;CDC11;CDC12;CLA4	Upregulated
carbon catabolite activation of transcription (GO:0045991)	0.0910727	0.123197	0.798628	0.999856	1.48087	-3.5483	RAS2;SWI3;SWI1	Upregulated
negative regulation of cell cycle process (GO:0010948)	0.0758071	0.103754	0.761898	0.999856	1.38298	-3.56749	MSH6;PDR16;AIP1	Upregulated
protein targeting to membrane (GO:0006612)	0.00814673	0.0157926	0.877379	0.999856	0.743986	-3.57867	AST1;HRI1;SRP1;KAP95;GET3;MRS6;GET4;SEC63	Upregulated
DNA replication, Okazaki fragment processing (GO:0033567)	0.0758071	0.103754	0.761898	0.999856	1.3941	-3.59617	POL32;POL3;CDC9	Upregulated
phosphatidylinositol biosynthetic process (GO:0006661)	0.090835	0.123197	0.947794	0.999856	1.52153	-3.6497	CDC1;DPM1;VAC14;VPS30;TED1	Upregulated
invasive growth in response to glucose limitation (GO:0001403)	0.0194967	0.0328113	0.944674	0.999856	0.928607	-3.6564	CDC42;NCS2;SNF1;RGA1;WHI3;GAL83;OSH3;ASC1	Upregulated
regulation of mitotic cell cycle phase transition (GO:1901990)	0.0483414	0.0734221	0.884477	0.999856	1.22805	-3.72035	CDC42;CLA4;CDC24;CDC28;RIO1	Upregulated
divalent metal ion transport (GO:0070838)	0.113694	0.147714	0.922191	0.999856	1.71453	-3.7278	BPT1;PMR1;ZRT3;PMC1	Upregulated
regulation of microtubule polymerization (GO:0031113)	0.10749	0.140256	0.830484	0.999856	1.67212	-3.72942	NAP1;SPC34;DUO1	Upregulated
telomere maintenance via telomere lengthening (GO:0010833)	0.05628	0.0836999	0.823553	0.999856	1.30126	-3.74428	RFA1;RFA2;HEK2;RAP1	Upregulated
recombinational repair (GO:0000725)	0.0730265	0.10242	0.964473	0.999856	1.44338	-3.77722	RFA1;BRE1;RFA2;RSC2;CTF18;MGM101	Upregulated
regulation of nuclear division (GO:0051783)	0.100665	0.131693	0.907721	0.999856	1.6512	-3.79108	UME1;NUP53;PSE1;RCK2	Upregulated
tRNA metabolic process (GO:0006399)	0.0206482	0.0339863	0.764566	0.999856	1.00385	-3.89506	PTA1;CEG1;SEN1;POP1;RPP1	Upregulated
carbon catabolite activation of transcription from RNA polymerase II promoter (GO:0000436)	0.100665	0.131693	0.907721	0.999856	1.7247	-3.95982	STB3;SWI3;SWI1;ADR1	Upregulated
cell cycle G2/M phase transition (GO:0044839)	0.12742	0.160309	0.934589	0.999856	1.95426	-4.02629	CDC34;PIN4;STH1;ZPR1	Upregulated
spliceosomal conformational changes to generate catalytic conformation (GO:0000393)	0.0768598	0.10491	0.871472	0.999856	1.57308	-4.03616	PRP19;SNU114;BRR2;PRP8	Upregulated
respiratory chain complex IV assembly (GO:0008535)	0.0883746	0.120409	0.89091	0.999856	1.69373	-4.10928	COX15;TIM21;RCF1;COX20	Upregulated
invasive filamentous growth (GO:0036267)	0.0315418	0.0499577	0.968934	0.999856	1.30001	-4.49343	CDC42;NCS2;SNF1;RGA1;WHI3;GAL83;OSH3;ASC1	Upregulated

## Sheet: UP_GOCC_Proteome
Term	P-value	Adjusted P-value	Old P-value	Old Adjusted P-value	Z-score	Combined Score	Genes	Enrichment
nucleus (GO:0005634)	6.6665e-171	1.82e-168	0.217603	0.812242	-1.56556	613.455	PKH2;RRP6;RRP7;MCA1;HAL5;SRM1;TUP1;RRP1;YGR017W;UBP15;SMC3;SMC4;SMC1;SLA1;TRM82;MSA2;NBP35;SET5;SET2;AIP1;PSY4;ASC1;CYK3;MED2;RTS1;PAT1;HOG1;CMS1;ARB1;YKL091C;RLF2;RPN7;ASF1;RPN2;RPN1;FPR1;IPI1;RPN9;ABD1;NUP82;IPI3;YTA7;SNF1;APA1;SNF2;PNO1;CDC9;REX4;ENP1;SNU114;CCA1;SNF4;NUC1;SAM4;ADI1;RAP1;IES1;PPT1;RAD18;RIB1;SOK1;PIH1;RAS2;YML079W;SAP1;ABF1;MRC1;APA2;TMC1;TRM5;HSP104;TRM1;SRP1;TRM8;DED1;NSA1;C…	Upregulated
mitochondrion (GO:0005739)	5.5979e-158	7.6412e-156	7.61e-05	0.00415568	-1.5418	558.265	TSC13;LIP5;VAS1;HSP60;PHB1;SEC4;UGA1;FAB1;ENO1;APN1;ENO2;GPM1;PHB2;SMC2;ZUO1;FRD1;FAS1;FSF1;FAS2;ERG6;IDP1;ERG9;SEC63;VAR1;GLT1;ZRG8;MDM38;YTA12;FAA1;GTT1;YPT31;TRZ1;LSC2;LSC1;PRE6;VPS21;LAP3;ECM16;TOF2;MPM1;JJJ1;SSQ1;YCP4;FPR1;GRS1;MRPL16;AYR1;MRPL17;MRPL15;YPR097W;OSM1;MRPL10;MRPL11;ADH3;VPS1;SLT2;RAD23;MYO4;AHP1;GCV1;MDV1;SSA2;GCV3;GCV2;VPS13;HSP78;NAM9;MSC6;CCP1;RHO1;EHT1;SNF1;CUE1;MRP1;GIP3;…	Upregulated
cytosol (GO:0005829)	1.0052e-155	9.1474e-154	3.21e-11	8.77e-09	-1.54368	550.934	SEC7;FAR8;PKH1;VAS1;HSP60;MCA1;HMT1;ECM21;UGA1;TFB1;SEC2;UBP15;ENO1;ENO2;GPM1;BRO1;TRM82;SIW14;NBP35;CDC25;SET2;VPS30;FRD1;FAS1;PHO81;CAJ1;FAS2;ASC1;ARA1;RIO1;COG8;MED2;COG4;RTS1;SKN7;PTI1;YSC84;FRS2;PRE2;MEU1;PRE7;PYC1;YOR283W;LSC1;GCS1;TKL1;SKO1;PYC2;RKR1;SEC53;ASF1;JJJ1;SWI3;NMD3;IPI1;KAP104;RPN9;ABD1;NUP82;VPS1;SLT2;SNX4;BIO4;HSP150;RAD23;VPS5;AHP1;SSA2;YTA7;GCV2;RHO3;AAT2;MEF1;GCD1;HTS1;VAC8…	Upregulated
nuclear lumen (GO:0031981)	3.84503e-66	2.62424e-64	0.000202668	0.00691604	-1.6501	248.544	RRP6;RRP7;RRP4;RRP5;RRP3;RPT6;DIP2;RRP1;RPD3;PWP1;CDC21;RPA190;ZUO1;TOM1;RRP43;RRP40;IMP4;SSF2;CIC1;MTR4;SSF1;RSA4;MSH2;RPT4;RPT5;RPT2;SQS1;RPT3;RRP45;DUG2;ECM16;FAL1;TOF2;RPN5;UTP22;JJJ1;UTP21;JIP5;NOP1;NOP2;RRB1;NOP7;RPF2;IPI1;NOP9;KAP104;PUF6;CBF5;EMG1;IPI3;RCM1;RAD23;TUB1;UTP20;MOT1;RKM1;MDN1;MKT1;NOP12;PNO1;ROK1;NOG2;GLN1;KAP95;REX4;SPB4;ENP1;NSG1;DRS1;RCL1;RIX7;RAP1;RIX1;BFR2;UTP30;POM34;FH…	Upregulated
preribosome (GO:0030684)	1.19e-51	6.48e-50	2e-05	0.00234776	-1.80696	211.886	PRP43;RPL3;RRP5;DIP2;RRP1;RPS4B;RPS0A;RPL7A;NOB1;NEW1;RIO1;UTP15;RPS5;UTP13;IMP4;SSF2;CIC1;CRM1;SSF1;UTP18;AFG2;NSA1;NAN1;CMS1;RPP0;SQS1;ERB1;ARB1;ECM16;UTP22;JJJ1;UTP21;NOP1;NOP2;NMD3;NOP7;RPF2;IPI1;NOP9;PUF6;CBF5;EMG1;ARX1;BMS1;HAS1;RPL1B;RPS3;KRE33;UTP20;RPS2;MEX67;MDN1;NOP12;NOP56;UTP8;MRT4;UTP7;NOP58;UTP6;UTP5;RLI1;UTP4;KRR1;PNO1;ROK1;NOG2;DIM1;SPB4;ENP1;DRS1;RPS1A;MAK21;RPS1B;UTP9;YVH1;RCL1…	Upregulated
cytoplasmic stress granule (GO:0010494)	3.48e-37	1.19e-35	3.44e-05	0.00234776	-1.68169	141.176	NRP1;NAB6;PPH21;KAP123;GUS1;NPL3;RPS0A;YEF3;LEU1;SUP45;CDC28;VMA2;ARC1;CPA1;TYS1;CYS4;SUP35;PAT1;FAA4;DED1;WHI3;XRN1;SES1;SSB2;CLU1;SEC53;PAB1;TIF3;TIF1;RPB2;SUI2;DHH1;PUB1;TIF34;TMA19;UGP1;MAP1;YHB1;GBP2;RBG1;MET5;MKT1;ECM32;PRS1;RQC2;BMH1;SSD1;YVH1;SAM1;SAM2;NIP1;TEF4;RPO21;PRT1;DBP5;CAM1	Upregulated
nucleolus (GO:0005730)	6.07e-43	2.76e-41	0.00431014	0.103944	-1.37124	133.295	RRP6;RRP7;RRP5;RRP3;DIP2;FHL1;RRP1;PWP1;RPA190;ZUO1;TOM1;UTP15;DIS3;RRP43;UTP13;IMP4;SSF2;CIC1;URB1;MTR4;SSF1;UTP18;NSA1;NAN1;RSA4;PAP2;SQS1;RRP45;TOP1;ERB1;ECM16;RNT1;FAL1;TOF2;UTP22;EFM1;JJJ1;UTP21;JIP5;NOP1;NOP2;RRB1;NOP7;RPF2;NOP9;PUF6;SIR2;CBF5;EMG1;RCM1;ARX1;BMS1;HAS1;GLC7;KRE33;UTP20;RKM1;NOP12;NOP56;UTP8;MRT4;UTP7;NOP58;UTP6;UTP5;UTP4;KRR1;PNO1;ROK1;SGD1;NOG2;REX4;SPB4;ENP1;DRS1;UTP9;RCL1…	Upregulated
cytoplasmic ribonucleoprotein granule (GO:0036464)	2.68e-39	1.05e-37	0.000133548	0.00520836	-1.50084	133.295	PSP2;NRP1;PSP1;NAB6;PPH21;KAP123;GUS1;NPL3;EDC3;RPS0A;YEF3;LEU1;SUP45;CDC28;CCR4;VMA2;ARC1;CPA1;TYS1;HEK2;CYS4;SUP35;PAT1;FAA4;DED1;WHI3;XRN1;SES1;SSB2;CLU1;SEC53;DCP1;NOT3;PAB1;TIF3;NOT5;TIF1;RPB2;SUI2;DHH1;PBY1;PUB1;TIF34;TMA19;UGP1;MAP1;YHB1;GBP2;RBG1;MET5;MKT1;DCS2;DCS1;ECM32;PRS1;RQC2;BMH1;SSD1;YVH1;SAM1;SAM2;NIP1;TEF4;RPO21;PRT1;DBP5;CAM1	Upregulated
90S preribosome (GO:0030686)	1.45e-35	4.4e-34	2.8e-05	0.00234776	-1.50129	120.432	PRP43;RRP5;DIP2;RPS4B;RPS0A;UTP15;RPS5;UTP13;IMP4;CIC1;UTP18;NAN1;CMS1;RPP0;SQS1;ECM16;UTP22;UTP21;NOP1;NOP9;CBF5;EMG1;BMS1;HAS1;RPS3;KRE33;UTP20;NOP56;UTP8;UTP7;NOP58;UTP6;UTP4;KRR1;PNO1;ROK1;DIM1;SPB4;ENP1;RPS1A;MAK21;RPS1B;UTP9;RCL1;NOC2;MRD1;NOC4;DBP8;TSR1;BFR2;UTP30	Upregulated
cytosolic proteasome complex (GO:0031597)	8.14e-24	2.02e-22	0.000125248	0.00520836	-1.73213	92.0899	RPN6;PUP2;PUP1;RPN5;RPN2;RPT6;RPN1;PUP3;RPN8;RPN9;SCL1;RPN12;RPN11;PRE2;PRE1;PRE10;PRE8;PRE7;PRE9;PRE4;PRE6;PRE5;RPT4;RPT5;RPT2;RPT3	Upregulated
preribosome, large subunit precursor (GO:0030687)	2.22e-24	6.06e-23	0.00456897	0.103944	-1.43459	78.1355	RPL3;JJJ1;NOP2;RRP1;NMD3;NOP7;RPF2;IPI1;PUF6;RPL7A;ARX1;NEW1;HAS1;RPL1B;MEX67;MDN1;NOP12;MRT4;RLI1;NOG2;SPB4;SSF2;CIC1;CRM1;DRS1;MAK21;SSF1;AFG2;YVH1;RIX7;NSA1;NOC2;NUG1;SDO1;YTM1;RPP0;REH1;SQS1;DBP6;DBP5;ERB1;ARB1;DBP3	Upregulated
endocytic patch (GO:0061645)	6.32e-20	1.23e-18	0.00417565	0.103944	-1.71108	75.6437	INP53;INP52;RGD1;SAC6;TWF1;ARP3;GTS1;RVS167;SLA2;SLA1;VPS1;MYO3;MYO5;AIP1;LSB5;LSB3;ABP1;SRV2;CAP2;CAP1;SYP1;ACT1;FKS1;ENT4;YSC84;CHC1;BSP1;AIM3;RVS161;VRP1;END3	Upregulated
cytosolic part (GO:0044445)	6.15e-20	1.23e-18	0.487659	1	-1.67763	74.211	MRPS17;RPL5;RPL3;RPT6;RPS4B;RPS0A;YEF3;RPL7A;MRPL7;RPL18B;PFK2;PFK1;ASC1;CCT3;YGR054W;CCT2;GCN2;RPS5;SNL1;CIC1;PAT1;MRPS5;LSG1;TCP1;GCN20;RPP0;RPT4;RPT5;RPT2;RPT3;TIF5;RPL10;JJJ1;TIF3;NMD3;ARX1;CDC48;MAP1;RPL1B;SSA2;RPS3;CCT8;RPS2;CCT7;CCT6;CCT5;GCN1;CCT4;RLI1;TMA64;RPS1A;RPS1B;RPL8B;RPL4A;NAT1;RPL4B;REH1;UTP30;HSP42;RPL8A	Upregulated
proteasome storage granule (GO:0034515)	2.21e-20	5.02e-19	0.000399136	0.0121071	-1.54424	69.8927	RPN6;PUP2;PUP1;RPN5;RPN2;RPT6;RPN1;PRE2;PRE1;PUP3;RPN8;PRE10;RPN9;PRE8;PRE7;PRE9;SCL1;PRE4;PRE6;PRE5;RPN12;RPN11	Upregulated
cortical actin cytoskeleton (GO:0030864)	4.47e-19	7.63e-18	0.00562887	0.109763	-1.61944	68.4234	INP53;INP52;RGD1;SAC6;TWF1;ARP3;GTS1;RVS167;SLA2;SLA1;VPS1;MYO3;MYO5;AIP1;LSB5;LSB3;ABP1;SRV2;CAP2;CAP1;ACT1;FKS1;ENT4;YSC84;CHC1;BSP1;AIM3;RVS161;VRP1;END3	Upregulated
actin cortical patch (GO:0030479)	4.47e-19	7.63e-18	0.00562887	0.109763	-1.30056	54.9503	INP53;INP52;RGD1;SAC6;TWF1;ARP3;GTS1;RVS167;SLA2;SLA1;VPS1;MYO3;MYO5;AIP1;LSB5;LSB3;ABP1;SRV2;CAP2;CAP1;ACT1;FKS1;ENT4;YSC84;CHC1;BSP1;AIM3;RVS161;VRP1;END3	Upregulated
ribosome (GO:0005840)	1.08e-16	1.73e-15	0.17027	0.812242	-1.26792	46.6164	YET1;PAB1;NOP1;SUI2;YHR020W;YEF3;MTC1;SSZ1;TMA19;MAP1;ZUO1;CDC28;FRD1;LHS1;RBG1;EFT1;GCN1;APE4;YGR054W;GCN2;YPR148C;TMA108;GIP3;RLI1;TMA64;RPS5;SNL1;RQC2;RSM7;RSA4;NAT1;BCH1;GCN20;TEF4;DUG1;TEF1;HER1;YDR239C;ARB1;RKR1	Upregulated
lytic vacuole membrane (GO:0098852)	1.34e-15	1.93e-14	0.834243	1	-1.35538	46.4161	NYV1;RSN1;SEC24;YVC1;SLM4;FAB1;VPH1;YBT1;YPT7;KRE2;VPS30;YCF1;CBP3;VMA2;VOA1;VMA5;VMA6;VTC1;VTC2;PHO91;SEC17;SFH5;VMA8;VTC3;VTC4;ITR1;VHC1;PMC1;AFG3;VMA1;BPT1;PEP8;ZRT3;PEP5;VAC14;IVY1;MYO2;CDC42;VPS1;VMA13;SSA2;ADP1;RHO5;EMP47;SCP160;SDH2;RHO1;VAC8;KTR3;KTR1;YPT52;CDC55;AMS1;YPT10;FAT1;TEF1	Upregulated
nucleoplasm part (GO:0044451)	1.13e-14	1.47e-13	0.299238	0.915751	-1.34792	43.29	GIS1;ASK10;TFB3;RPO31;TFB1;RPB2;RPB3;SPT15;ABD1;IPI3;ORC1;GAL11;RPB5;RPC82;CCL1;MED2;TAF12;EAF3;ELP2;RPC40;SRB2;ELP4;IWR1;NPA3;RGR1;HAT2;RET1;HAT1;SRB4;MCM3;MCM4;RPO21;MCM6;TAF5;TAF4;FCP1;TAF2;TAF1	Upregulated
fungal-type vacuole membrane (GO:0000329)	7.58e-16	1.15e-14	0.836784	1	-1.2261	42.6876	NYV1;RSN1;SEC24;YVC1;SLM4;FAB1;VPH1;YBT1;YPT7;KRE2;VPS30;YCF1;CBP3;SEH1;VMA2;VOA1;VMA5;VMA6;VTC1;VTC2;PHO91;SEC17;SFH5;VMA8;VTC3;VTC4;ITR1;VHC1;PMC1;AFG3;VMA1;BPT1;PEP8;ZRT3;PEP5;VAC14;IVY1;MYO2;CDC42;VPS1;VMA13;SSA2;ADP1;RHO5;EMP47;SCP160;SDH2;RHO1;VAC8;KTR3;KTR1;YPT52;CDC55;AMS1;YPT10;FAT1;TEF1	Upregulated
mitochondrial matrix (GO:0005759)	1.64e-15	2.24e-14	0.0942846	0.656153	-1.24707	42.4549	BAT1;MSW1;PDB1;PUT2;SSQ1;MCX1;ADH3;LPD1;MSS116;DLD2;YHB1;PIM1;MDJ1;NDI1;HSP78;ARG8;MSC6;HEM1;PDA1;TRM5;MDH1;POS5;IDH1;DIM1;COQ8;CCA1;MAS2;LAT1;MAS1;FUM1;PTC5;ACO1;PPX1	Upregulated
SWI/SNF superfamily-type complex (GO:0070603)	7.62e-12	6.71e-11	0.0111731	0.179427	-1.593	40.7816	ARP9;ARP7;NPL6;RSC1;STH1;RSC58;RSC8;RSC9;RSC6;RSC4;RSC30;RSC2;RSC3;SFH1	Upregulated
Golgi subcompartment (GO:0098791)	2.7e-14	3.21e-13	0.0847792	0.642909	-1.30417	40.7449	SEC22;SEC7;SEC21;ARL1;DOP1;MNN11;SNC1;GGA2;KEX1;GGA1;RUD3;VPS74;PIK1;EMP47;NEO1;YPT1;RIC1;SEC14;SED5;SEC18;YPT31;GRH1;SLY1;CHS5;GYP6;PMR1;GCS1;KES1;VPS45	Upregulated
mitochondrial outer membrane (GO:0005741)	1.88e-14	2.33e-13	0.11403	0.7111	-1.20057	37.9467	SEC4;TOM71;AYR1;HFD1;LSP1;ERG27;TOM70;VPS1;YPT7;MDV1;ERG6;RHO1;ERG9;EHT1;CBR1;YGR266W;TOM40;FAA1;GTT1;DNM1;DPM1;YPT31;NCP1;ALO1;FMP52;GSF2;VPS21;SAC1;TCD2;PIL1;POR1	Upregulated
mitochondrial small ribosomal subunit (GO:0005763)	5.12e-13	5.37e-12	0.0183285	0.263351	-1.30354	36.8914	MRPS17;MRPS28;RSM10;MRP1;VAR1;MRP51;MRPS35;RSM24;PET123;RSM25;RSM23;MRP4;RSM7;MRP13;MRPS5;MRPS9;RSM28;RSM26;NAM9	Upregulated
vesicle coat (GO:0030120)	2.41e-12	2.28e-11	0.0103282	0.179427	-1.33983	35.8427	SEC21;SEC13;SEC24;SFB3;SEC23;SEC26;SFB2;SEC28;SEC27;SAR1;CHC1;COP1;GRH1;RET2;SEC31	Upregulated
fungal-type vacuole (GO:0000324)	6.48e-14	7.08e-13	0.999985	1	-1.15434	35.0539	NYV1;RSN1;SEC24;YVC1;PST1;SLM4;CWH41;FAB1;ENO1;VPH1;ENO2;YBT1;KEX1;YPT7;KRE2;VPS30;YCF1;CBP3;VMA2;VOA1;CLA4;VMA5;VMA6;VTC1;VTC2;PHO91;SEC17;SFH5;VMA8;VTC3;VTC4;GRX6;ITR1;VHC1;GRX7;PMC1;AFG3;VMA1;PEP1;BPT1;FLC1;PEP8;ECM14;GAS3;PEP4;ZRT3;PEP5;VAC14;SLG1;IVY1;PRD1;MYO2;CDC42;VPS1;URA8;VMA13;URA7;SSA2;ADP1;RHO5;EMP47;YDR248C;SCP160;MET5;SDH2;YKT6;RHO1;APE4;SNF1;APE3;VAC8;KTR3;KTR1;KTR6;CTS1;YPT52;CDC…	Upregulated
RSC complex (GO:0016586)	7.62e-12	6.71e-11	0.0111731	0.179427	-1.36919	35.052	ARP9;ARP7;NPL6;RSC1;STH1;RSC58;RSC8;RSC9;RSC6;RSC4;RSC30;RSC2;RSC3;SFH1	Upregulated
small-subunit processome (GO:0032040)	3.34e-14	3.8e-13	0.0375291	0.409818	-1.11535	34.6103	RRP5;UTP22;UTP21;NOP1;DIP2;EMG1;UTP20;RPS2;NOP56;UTP15;UTP8;UTP7;NOP58;UTP6;UTP5;UTP4;KRR1;UTP13;IMP4;UTP18;UTP9;NAN1;NOC4;BFR2;ECM16	Upregulated
nuclear DNA-directed RNA polymerase complex (GO:0055029)	1.89e-11	1.56e-10	0.0658948	0.594935	-1.32433	32.7025	POL1;ASK10;RPA135;RPO31;RPB2;RPB3;RPC40;RPA43;SPT16;IWR1;PRI1;ABD1;NPA3;POB3;RET1;RPA190;RPB5;RPC82;RPO21;FCP1	Upregulated
chaperonin-containing T-complex (GO:0005832)	4.81e-10	3.28e-09	0.0141739	0.214971	-1.45471	31.2119	CCT3;CCT2;SSA2;TCP1;CCT8;CCT7;CCT6;CCT5;HSP42;CCT4	Upregulated
cytoplasmic vesicle (GO:0031410)	1.28e-10	9.21e-10	0.0249255	0.340233	-1.36678	31.1314	SEC7;SYP1;SEC26;APL1;CDC42;GYL1;GYP5;VPS21;CHS3;CHS1;RHO3;YPT1;RHO1;RHO2	Upregulated
polysome (GO:0005844)	2.04e-12	2.06e-11	0.0273233	0.355202	-1.14288	30.7667	GIR2;TRL1;ECM32;STO1;TIF3;TSA1;SSE1;SSZ1;NEW1;SDO1;SSB2;SSA2;ZUO1;LHS1;NAM7;DBP5;RBG1;SCP160;MKT1	Upregulated
cytoskeleton (GO:0005856)	1.53e-09	1.02e-08	0.0305484	0.377473	-1.42874	29.0014	CDC42;SYP1;CDC10;CDC11;CDC12;RGD2;SHS1;RHO5;GCS1;PKC1;CDC3;HSP42	Upregulated
cytosolic ribosome (GO:0022626)	6.65e-11	5.04e-10	0.924598	1	-1.19748	28.0619	MRPS17;RPL5;RPL3;TIF5;RPL10;JJJ1;TIF3;NMD3;RPS4B;RPS0A;YEF3;RPL7A;ARX1;MRPL7;RPL18B;CDC48;MAP1;RPL1B;RPS3;RPS2;ASC1;GCN1;YGR054W;GCN2;RLI1;TMA64;RPS5;SNL1;CIC1;PAT1;RPS1A;MRPS5;RPS1B;RPL8B;LSG1;RPL4A;NAT1;RPL4B;GCN20;RPP0;REH1;UTP30;RPL8A	Upregulated
nuclear chromosome part (GO:0044454)	2.27e-11	1.82e-10	0.995492	1	-1.13219	27.7476	POL2;POL1;POL3;UME1;SRM1;FHL1;CTF18;RPD3;ASP1;CHD1;SMC4;SMC2;PDS5;SET5;VPS72;MRC1;RIO1;CTI6;MAD1;HEK2;RTS1;HDA1;PRI1;HAT1;MCM3;MCM4;MCM6;CTF4;POL32;HIR1;BRE1;ISW1;ARP5;SWI4;SGV1;ARP4;SPT16;SIR2;RVB2;ORC1;POB3;RVB1;RTT103;SWI6;GLC7;SIN3;SNT1;ACT1;RFA1;TFC3;TPK1;BCY1;INO80;RAP1;IES1;RAD18	Upregulated
nucleoplasm (GO:0005654)	3.96e-11	3.09e-10	0.0637978	0.594935	-1.15765	27.7288	MRT4;SEC13;MLP2;RRP43;SRP1;NOG2;RPB3;SPB4;OPI1;IPI1;IPI3;ARX1;NOC2;RAD23;RIX1;PAP1;UTP20;MDN1;RNT1	Upregulated
nuclear periphery (GO:0034399)	2.43e-12	2.28e-11	0.114609	0.7111	-0.993128	26.5608	POM34;NVJ1;RPD3;SRC1;KAP123;OPI1;KAP104;CDC21;EMG1;MRC1;TUB1;MKT1;POM152;HSP104;MDH2;GLN1;KAP95;PSE1;NSG1;SRP68;HMG1;DUS3;RBD2;GAS1;DUG2	Upregulated
cell cortex part (GO:0044448)	8.2e-11	6.05e-10	0.061422	0.594935	-1.14068	26.492	SYP1;RTN1;SFH5;TCB3;LCB4;OSH3;OSH2;SEY1;CDC3;CDC42;CDC10;DPL1;CDC11;CDC12;SHS1;OSH7;OSH6;TCB1	Upregulated
lipid droplet (GO:0005811)	1.43e-10	9.98e-10	0.140576	0.783209	-1.16268	26.3595	EHT1;PGC1;SLC1;PDR16;GPT2;AYR1;HFD1;FAA1;ERG27;FAA4;CSR1;LOA1;ERG1;FAT1;FAS1;ERG6;TDH3;TGL4;TDH2;YIM1;PAH1	Upregulated
DNA-directed RNA polymerase II, holoenzyme (GO:0016591)	1.45e-11	1.23e-10	0.244711	0.827067	-1.00482	25.0793	ASK10;TFB3;TFB1;CTR9;RPB2;RPB3;SPT15;CDC73;ABD1;GAL11;RPB5;CCL1;CCR4;MED2;TAF12;SRB2;IWR1;NPA3;RGR1;SRB4;PAF1;RPO21;TAF5;TAF4;FCP1;TAF2;TAF1	Upregulated
transferase complex, transferring phosphorus-containing groups (GO:0061695)	1.33e-07	6.72e-07	0.0332196	0.377873	-1.56381	24.7614	PRS5;PRS2;PRS1;PRS4;PRS3;PFK2;PFK1	Upregulated
endoplasmic reticulum tubular network (GO:0071782)	1.56e-08	9.49e-08	0.0797999	0.622439	-1.22795	22.0708	LNP1;RTN1;SFH5;TCB3;LCB4;OSH3;OSH2;SEY1;DPL1;OSH7;OSH6;TCB1;YOP1	Upregulated
COPII vesicle coat (GO:0030127)	5.42e-08	3.02e-07	0.0318017	0.377473	-1.25902	21.0647	SEC13;SEC24;SFB3;SEC23;GRH1;SFB2;SAR1;SEC31	Upregulated
Golgi membrane (GO:0000139)	1.72e-08	1.02e-07	0.135139	0.768602	-1.13472	20.2837	SEC22;SEC21;RIC1;SEC14;SED5;MNN11;RUD3;GRH1;SLY1;PMR1;EMP47;KES1;VPS45;NEO1;YPT1	Upregulated
nuclear proteasome complex (GO:0031595)	5.57e-06	2.24e-05	0.0724137	0.599059	-1.60176	19.3785	RPN5;RPT6;RPT4;RPT5;RPT2;RPT3	Upregulated
cis-Golgi network (GO:0005801)	3.51e-07	1.71e-06	0.069736	0.594935	-1.29491	19.2463	YPT6;RIC1;GRH1;SED5;GRX6;MNN9;GRX7;YPT1;SPF1	Upregulated
actin filament (GO:0005884)	5.16e-07	2.47e-06	0.0598496	0.594935	-1.32381	19.1639	CAP1;ACT1;VRP1;AIP1;SAC6;TWF1;BNI1;CAP2	Upregulated
P-body (GO:0000932)	5.35e-09	3.48e-08	0.2309	0.827067	-0.999073	19.028	PSP2;DCS2;PSP1;DCS1;NAB6;NOT3;HEK2;NOT5;PAT1;SSD1;DHH1;EDC3;PBY1;PUB1;WHI3;XRN1;CCR4;DCP1;MKT1	Upregulated
nuclear chromatin (GO:0000790)	1.81e-08	1.03e-07	0.934342	1	-1.05171	18.7484	HIR1;BRE1;UME1;SRM1;ISW1;FHL1;ARP5;SWI4;SGV1;ARP4;RPD3;SPT16;ASP1;CHD1;SIR2;RVB2;POB3;RVB1;SET5;VPS72;RTT103;SWI6;SIN3;SNT1;RIO1;ACT1;CTI6;TPK1;BCY1;INO80;HDA1;HAT1;IES1;RAD18	Upregulated
Golgi-associated vesicle (GO:0005798)	8.36e-09	5.31e-08	0.212577	0.812242	-0.991135	18.4353	SEC7;ERP1;ERP2;ERP4;MTC1;ERV41;GYL1;GYP5;RET2;SLY1;RBD2;ERV46;GAS1;EMP24;YIP3;EMP47;NEO1;BET1	Upregulated
cortical endoplasmic reticulum (GO:0032541)	6.28e-07	2.96e-06	0.14349	0.783454	-1.25394	17.9065	DPL1;RTN1;OSH7;SFH5;OSH6;TCB3;TCB1;LCB4;OSH3;OSH2;SEY1	Upregulated
coated vesicle (GO:0030135)	9.55e-09	5.93e-08	0.312666	0.915751	-0.94661	17.4807	SEC26;SLA2;AGE2;ERP1;ERP2;ERP4;MTC1;ERV41;BCH1;RET2;SLY1;RBD2;ERV46;GAS1;GYP6;EMP24;YIP3;EMP47;NEO1;BET1	Upregulated
ER to Golgi transport vesicle membrane (GO:0012507)	3.51e-07	1.71e-06	0.069736	0.594935	-1.17566	17.4739	SEC22;SEC13;SEC24;SFB3;SEC23;GRH1;SFB2;SAR1;SEC31	Upregulated
nucleolar part (GO:0044452)	6.56e-08	3.51e-07	0.194617	0.812242	-1.02607	16.971	NOP56;NOP58;RPA135;POP1;ISW1;NOP1;RPC40;RPA43;CHD1;SIR2;HAS1;RPA190;RPB5;RPP1;RIO1	Upregulated
vacuolar proton-transporting V-type ATPase complex (GO:0016471)	2.74e-06	1.17e-05	0.132409	0.768602	-1.24011	15.8813	VMA2;VMA13;VMA5;VMA6;VMA8;PFK2;PFK1;VPH1;VMA1	Upregulated
chromatin (GO:0000785)	6.83e-08	3.59e-07	0.813199	1	-0.959166	15.8252	RLF2;HIR1;BRE1;SRM1;CTR9;FHL1;SWI4;SGV1;ARP4;SPT16;ASP1;CHD1;CDC73;PDS5;POB3;SET5;RTT103;SWI6;SPT6;SIN3;TPK1;BCY1;RTG2;IMD2;HAT1;PAF1;RAD18	Upregulated
mitochondrial large ribosomal subunit (GO:0005762)	1.77e-08	1.03e-07	0.25481	0.848332	-0.880289	15.711	MRP7;MRPL16;MRPL17;MRPL15;IMG1;MRPL24;MRPL35;MRPL10;MRPL11;MRPL22;MRPL3;MRPL1;MRPL40;MRPL8;MRPL7;MRPL6;YML6;MRPL9	Upregulated
Rpd3S complex (GO:0032221)	1.49e-06	6.68e-06	0.0507556	0.532933	-1.16973	15.6924	CTI6;UME1;RCO1;EAF3;RPD3;SIN3	Upregulated
polymeric cytoskeletal fiber (GO:0099513)	8.16e-08	4.2e-07	0.130046	0.768602	-0.930992	15.1951	CAP1;ACT1;SAC6;TWF1;BNI1;TUB4;TUB3;VRP1;TUB2;AIP1;TUB1;MHP1;CAP2	Upregulated
COPI-coated vesicle membrane (GO:0030663)	1.56e-05	5.91e-05	0.0985431	0.656153	-1.33149	14.7378	SEC21;COP1;SEC26;SEC28;RET2;SEC27	Upregulated
ribose phosphate diphosphokinase complex (GO:0002189)	1.64e-05	6.14e-05	0.0782175	0.622439	-1.31669	14.5066	PRS5;PRS2;PRS1;PRS4;PRS3	Upregulated
septin filament array (GO:0032160)	1.56e-05	5.91e-05	0.0985431	0.656153	-1.22205	13.5264	CDC10;CDC11;CDC12;SHS1;PKC1;CDC3	Upregulated
mitochondrial inner membrane (GO:0005743)	5.57e-08	3.04e-07	0.800861	1	-0.796874	13.3109	ODC2;PHB1;HEM15;ARH1;HEM14;COX15;SSC1;YME1;CYT1;PHB2;GGC1;YLH47;DLD1;QCR2;MDL2;MGR3;MDM38;YTA12;AFG3;COQ4;MAS2;NUC1;MGM1;YHM2;MIC60;COX20;PET9	Upregulated
nuclear exosome (RNase complex) (GO:0000176)	7.46e-07	3.39e-06	0.0880688	0.649805	-0.920843	12.992	RRP6;RRP4;DIS3;RRP43;RRP40;SRP1;CSL4;KAP95;RRP45	Upregulated
COPI vesicle coat (GO:0030126)	1.56e-05	5.91e-05	0.0985431	0.656153	-1.15701	12.8065	SEC21;COP1;SEC26;SEC28;RET2;SEC27	Upregulated
trans-Golgi network (GO:0005802)	7.15e-07	3.31e-06	0.293502	0.910522	-0.886623	12.5466	SEC7;ARL1;DOP1;SNC1;GGA2;KEX1;YPT31;GGA1;VPS74;CHS5;GYP6;PIK1;GCS1;NEO1	Upregulated
mating projection base (GO:0001400)	5.37e-05	0.00018104	0.110107	0.7111	-1.23008	12.0939	SYP1;CDC10;CDC11;GLC7;CDC3	Upregulated
replication fork (GO:0005657)	1.68e-06	7.39e-06	0.192068	0.812242	-0.891646	11.8564	CTF4;POL2;POL1;POL3;SEN1;POL30;MRC1;CDC9;MCM4;CTF18;PRI1	Upregulated
actin cytoskeleton (GO:0015629)	3.73e-06	1.57e-05	0.189741	0.812242	-0.925762	11.5711	CAP1;ACT1;VRP1;AIP1;SAC6;TWF1;BNI1;MYO2;SRV2;CAP2	Upregulated
preribosome, small subunit precursor (GO:0030688)	2.74e-06	1.17e-05	0.132409	0.768602	-0.894741	11.4584	NOB1;NOC4;RPS3;TSR1;ENP1;SQS1;UTP20;NOP9;RIO1	Upregulated
COPII-coated ER to Golgi transport vesicle (GO:0030134)	3.82e-06	1.58e-05	0.302188	0.915751	-0.884102	11.0292	SEC22;ERP4;ERV41;SLY1;ERV46;GAS1;EMP24;YIP3;EMP47;ERP1;BET1;ERP2	Upregulated
heterochromatin (GO:0000792)	1.77e-05	6.55e-05	0.181215	0.812242	-0.976293	10.6798	SIR2;UTP15;UTP8;NAN1;UTP5;SPT5;FUN30;UTP9	Upregulated
large ribosomal subunit (GO:0015934)	4.33e-06	1.76e-05	0.906358	1	-0.838343	10.3534	RPL5;RPL3;RPL10;JJJ1;NMD3;CIC1;MRPL11;PUF6;RPL7A;RPL8B;LSG1;RPL4A;ARX1;MRPL8;MRPL7;RPL18B;RPL4B;CDC48;RPL1B;RPP0;REH1;UTP30;RPL8A	Upregulated
SLIK (SAGA-like) complex (GO:0046695)	2.98e-05	0.00010549	0.213318	0.812242	-0.940667	9.80416	GCN5;SPT20;TAF12;TRA1;RTG2;TAF5;SGF73;CHD1	Upregulated
membrane raft (GO:0045121)	2.06e-05	7.49e-05	0.311083	0.915751	-0.896998	9.68017	AIM3;AST1;RVS161;TRK1;RFS1;YCP4;PMA1;VAC8;GAS1;SLM1	Upregulated
proton-transporting V-type ATPase complex (GO:0033176)	0.000493892	0.00126012	0.16855	0.812242	-1.25843	9.58071	VMA6;PFK2;PFK1;VPH1	Upregulated
septin ring (GO:0005940)	4.79e-05	0.000163423	0.315537	0.915751	-0.918842	9.13937	CDC42;SNF1;SYP1;CDC10;CDC11;CDC12;SHS1;BUD4;CDC3	Upregulated
multi-eIF complex (GO:0043614)	7.47e-05	0.000231849	0.163226	0.812242	-0.917556	8.71821	TIF34;TIF5;NIP1;PRT1;SUI2;GCD11	Upregulated
cellular bud neck septin ring (GO:0000144)	0.000108263	0.000321259	0.245393	0.827067	-0.953062	8.70236	SNF1;SYP1;CDC10;CDC11;CDC12;SHS1;CDC3	Upregulated
mitochondrial pyruvate dehydrogenase complex (GO:0005967)	0.000133958	0.000384954	0.147202	0.787966	-0.957624	8.54007	LAT1;PDA1;LPD1;PTC5;PDB1	Upregulated
vacuolar proton-transporting V-type ATPase, V1 domain (GO:0000221)	0.000281913	0.000762003	0.188752	0.812242	-1.01649	8.3087	VMA2;VMA13;VMA5;VMA8;VMA1	Upregulated
vacuolar transporter chaperone complex (GO:0033254)	0.000493892	0.00126012	0.16855	0.812242	-1.05219	8.01056	VTC1;VTC2;VTC3;VTC4	Upregulated
integral component of mitochondrial inner membrane (GO:0031305)	1.08e-05	4.28e-05	0.392203	0.970564	-0.691976	7.91305	AIM24;FMP25;MIC26;PSD1;YME2;CIR2;RCF1;YTA12;TIM23;MIC60;AFG3;MIR1	Upregulated
SWI/SNF complex (GO:0016514)	6.53e-05	0.000209768	0.208504	0.812242	-0.808173	7.78782	RSC9;SNF2;ARP9;ARP7;SWI3;SFH1;SWI1	Upregulated
BAF-type complex (GO:0090544)	6.53e-05	0.000209768	0.208504	0.812242	-0.787612	7.58969	RSC9;SNF2;ARP9;ARP7;SWI3;SFH1;SWI1	Upregulated
proton-transporting V-type ATPase, V1 domain (GO:0033180)	0.000281913	0.000762003	0.188752	0.812242	-0.887353	7.25315	VMA2;VMA13;VMA5;VMA8;VMA1	Upregulated
rDNA heterochromatin (GO:0033553)	0.000241986	0.000674103	0.241334	0.827067	-0.863069	7.18646	UTP15;UTP8;NAN1;UTP5;SPT5;UTP9	Upregulated
transcriptionally active chromatin (GO:0035327)	0.000527437	0.00133324	0.233856	0.827067	-0.951412	7.18077	CTR9;PAF1;SPT6;RTG2;CDC73	Upregulated
chromosomal region (GO:0098687)	3.46e-05	0.000119632	0.433469	1	-0.6986	7.17539	RLF2;HIR1;GCN5;MFT1;RFA1;RFA2;SUB2;HRR25;RTS1;SRC1;FUN30	Upregulated
endoplasmic reticulum lumen (GO:0005788)	7.47e-05	0.000231849	0.163226	0.812242	-0.750621	7.13207	KAR2;ERG3;LHS1;PDI1;GTB1;ROT2	Upregulated
septin cytoskeleton (GO:0032156)	0.000241986	0.000674103	0.241334	0.827067	-0.853494	7.10673	CDC42;CDC10;CDC11;CDC12;SHS1;CDC3	Upregulated
SAGA complex (GO:0000124)	0.000111815	0.00032474	0.319915	0.915751	-0.755994	6.87854	GCN5;SPT20;TAF12;SPT8;TRA1;TAF5;SGF73;CHD1	Upregulated
Cdc73/Paf1 complex (GO:0016593)	0.00202763	0.00461286	0.275198	0.883872	-1.0925	6.77449	CTR9;PAF1;CCR4;CDC73	Upregulated
endoplasmic reticulum-Golgi intermediate compartment (GO:0005793)	7.43e-05	0.000231849	0.283047	0.891465	-0.672105	6.3899	SEC22;ERP4;SEC21;EMP24;EMP47;GCS1;ERP1;ERP2	Upregulated
cytoplasmic exosome (RNase complex) (GO:0000177)	6.53e-05	0.000209768	0.208504	0.812242	-0.64992	6.26285	RRP4;DIS3;RRP43;RRP40;CSL4;RRP45;SSD1	Upregulated
tRNA methyltransferase complex (GO:0043527)	0.0010808	0.00258822	0.220168	0.812242	-0.891681	6.09024	GCD10;GCD14;TRM8;TRM82	Upregulated
Ino80 complex (GO:0031011)	0.000108263	0.000321259	0.245393	0.827067	-0.654382	5.97513	ACT1;RVB2;RVB1;ARP5;IES1;ARP4;INO80	Upregulated
eukaryotic 48S preinitiation complex (GO:0033290)	0.0010808	0.00258822	0.220168	0.812242	-0.872685	5.96049	TIF5;PRT1;SUI2;GCD11	Upregulated
small ribosomal subunit (GO:0015935)	3.03e-05	0.000106204	0.855953	1	-0.570943	5.93947	MRPS17;YGR054W;RSM10;TIF5;TIF3;TMA64;RPS5;RPS4B;PAT1;RPS1A;MRPS5;RPS0A;RPS1B;MRPS9;RPS3;NAM9;RPS2;ASC1	Upregulated
cellular bud scar (GO:0005621)	0.0010808	0.00258822	0.220168	0.812242	-0.803065	5.48498	CDC12;HSP150;GAS1;BUD4	Upregulated
box C/D snoRNP complex (GO:0031428)	0.0010808	0.00258822	0.220168	0.812242	-0.785668	5.36616	NOP56;NOP58;HAS1;NOP1	Upregulated
nuclear envelope lumen (GO:0005641)	0.000493892	0.00126012	0.16855	0.812242	-0.6655	5.06658	POM152;SNF1;GAL83;SNF4	Upregulated
nuclear replisome (GO:0043601)	0.000171623	0.000488053	0.284093	0.891465	-0.583871	5.06229	POL2;POL32;POL1;POL3;POB3;SPT16;PRI1	Upregulated
integral component of mitochondrial membrane (GO:0032592)	2.83e-05	0.000101604	0.699412	1	-0.468103	4.90252	TOM71;YME2;HFD1;GUT2;TOM70;AIM24;FMP25;ALO1;PSD1;CIR2;RCF1;POR1;TIM23;CBP3;MIR1	Upregulated
mating projection (GO:0005937)	0.000261903	0.000722218	0.324102	0.915751	-0.558482	4.6061	SYP1;CDC10;CDC11;RVS161;CDC12;GLC7;CDC3	Upregulated
alpha DNA polymerase:primase complex (GO:0005658)	0.00202763	0.00461286	0.275198	0.883872	-0.684848	4.24666	POL1;POB3;SPT16;PRI1	Upregulated
cytosolic large ribosomal subunit (GO:0022625)	9.5e-05	0.000288276	0.959174	1	-0.438064	4.05702	RPL5;RPL3;RPL10;JJJ1;NMD3;CIC1;RPL7A;RPL8B;LSG1;RPL4A;ARX1;MRPL7;RPL18B;RPL4B;CDC48;RPL1B;RPP0;REH1;UTP30;RPL8A	Upregulated
mitotic cohesin complex (GO:0030892)	0.00800159	0.0148601	0.329291	0.915751	-0.802513	3.87463	PDS5;SMC3;SMC1	Upregulated
nuclear microtubule (GO:0005880)	0.00202763	0.00461286	0.275198	0.883872	-0.617609	3.82972	EMG1;TUB3;TUB2;TUB1	Upregulated
integral component of endoplasmic reticulum membrane (GO:0030176)	8e-05	0.000245535	0.794835	1	-0.399192	3.76554	CUE1;RTN1;SEC12;GPT2;SRP102;SCS2;ELO3;OLE1;MGA2;ERV41;ERV46;GSF2;ERG4;SAC1;EMP47	Upregulated
endocytic vesicle (GO:0030139)	0.0010808	0.00258822	0.220168	0.812242	-0.543225	3.71026	SYP1;YPT7;VPS21;APL1	Upregulated
RNA polymerase II transcription factor complex (GO:0090575)	6.42e-05	0.000209768	0.866993	1	-0.361036	3.48546	MED2;TAF12;TFB3;TFB1;SWI4;SRB2;SPT15;ASP1;RGR1;GAL11;SWI6;SRB4;CCL1;TAF5;TAF4;TAF2;TAF1	Upregulated
nuclear mitotic cohesin complex (GO:0034990)	0.00800159	0.0148601	0.329291	0.915751	-0.706373	3.41045	PDS5;SMC3;SMC1	Upregulated
microtubule cytoskeleton (GO:0015630)	0.000109493	0.000321414	0.478558	1	-0.35588	3.2455	CDC10;CDC11;CDC12;TUB4;SHS1;TUB3;TUB2;TUB1;MHP1;CDC3	Upregulated
transcription factor TFIID complex (GO:0005669)	0.00132808	0.00312557	0.417565	0.999958	-0.455061	3.01433	TAF12;TAF5;SPT15;TAF4;TAF2;TAF1	Upregulated
cellular bud neck contractile ring (GO:0000142)	0.00220698	0.00470709	0.380826	0.970564	-0.472567	2.89028	ACT1;CYK3;MYO1;BUD4;BUD3	Upregulated
translation preinitiation complex (GO:0070993)	0.00342421	0.00702863	0.332085	0.915751	-0.47862	2.71707	TIF5;PRT1;SUI2;GCD11	Upregulated
histone acetyltransferase complex (GO:0000123)	0.00220698	0.00470709	0.380826	0.970564	-0.440914	2.69669	HAT2;HAT1;EAF3;ELP2;ELP4	Upregulated
INO80-type complex (GO:0097346)	0.000602806	0.00150978	0.508974	1	-0.350047	2.59522	ACT1;RVB2;RVB1;VPS72;ARP5;IES1;ARP4;INO80	Upregulated
Golgi cisterna (GO:0031985)	0.000386758	0.0010251	0.364917	0.970564	-0.295312	2.32047	ANP1;GNT1;VPS74;OCH1;SAC1;SWH1;GEA2	Upregulated
mitochondrial proton-transporting ATP synthase complex, catalytic core F(1) (GO:0000275)	0.00800159	0.0148601	0.329291	0.915751	-0.478914	2.31225	ATP3;ATP1;ATP2	Upregulated
nuclear replication fork (GO:0043596)	0.00321339	0.00664588	0.430645	1	-0.394828	2.26648	CTF4;MRC1;MCM4;CTF18;PRI1	Upregulated
actin filament bundle (GO:0032432)	0.0198909	0.0317557	0.464935	1	-0.578468	2.26615	ACT1;SAC6;MYO2	Upregulated
Sin3-type complex (GO:0070822)	0.00186117	0.00434273	0.462055	1	-0.334858	2.1051	CTI6;UME1;RCO1;EAF3;RPD3;SIN3	Upregulated
signal recognition particle, endoplasmic reticulum targeting (GO:0005786)	0.0131922	0.0222313	0.39818	0.970564	-0.482481	2.08824	SRP72;SRP54;SRP68	Upregulated
mRNA cleavage and polyadenylation specificity factor complex (GO:0005847)	0.00132808	0.00312557	0.417565	0.999958	-0.28724	1.90269	PTA1;PAP1;GLC7;PTI1;MPE1;CFT2	Upregulated
cytosolic small ribosomal subunit (GO:0022627)	0.000331218	0.000886494	0.89915	1	-0.23555	1.8874	MRPS17;YGR054W;TIF5;TIF3;TMA64;RPS5;RPS4B;PAT1;RPS1A;MRPS5;RPS0A;RPS1B;RPS3;RPS2;ASC1	Upregulated
DNA-directed RNA polymerase I complex (GO:0005736)	0.00451231	0.00892653	0.479564	1	-0.283333	1.53027	RPA135;RPA190;RPB5;RPC40;RPA43	Upregulated
nuclear condensin complex (GO:0000799)	0.0131922	0.0222313	0.39818	0.970564	-0.307221	1.32969	TFC3;SMC4;SMC2	Upregulated
clathrin coat of endocytic vesicle (GO:0030128)	0.0743576	0.10684	0.567508	1	-0.463697	1.20509	APL1;SLA2	Upregulated
intrinsic component of mitochondrial inner membrane (GO:0031304)	0.000447339	0.00117427	0.561361	1	-0.154462	1.19124	AIM24;FMP25;PSD1;YME2;CIR2;MGM1;RCF1;TIM23;MIR1	Upregulated
mitochondrial respiratory chain complex III (GO:0005750)	0.0111224	0.0197169	0.500801	1	-0.232762	1.04715	MAS1;COR1;QCR2;CYT1	Upregulated
Swr1 complex (GO:0000812)	0.00451231	0.00892653	0.479564	1	-0.188156	1.01622	ACT1;RVB2;RVB1;VPS72;ARP4	Upregulated
signal recognition particle (GO:0048500)	0.0131922	0.0222313	0.39818	0.970564	-0.230512	0.997687	SRP72;SRP54;SRP68	Upregulated
Golgi medial cisterna (GO:0005797)	0.0198909	0.0317557	0.464935	1	-0.253502	0.99309	GNT1;VPS74;SAC1	Upregulated
nuclear pre-replicative complex (GO:0005656)	0.0105721	0.0192411	0.615346	1	-0.2164	0.984519	IPI3;ORC1;MCM3;MCM4;MCM6	Upregulated
chromosome, centromeric region (GO:0000775)	0.0057061	0.0111269	0.626871	1	-0.170721	0.881984	RLF2;HIR1;GCN5;HRR25;RTS1;FUN30	Upregulated
clathrin adaptor complex (GO:0030131)	0.0111224	0.0197169	0.500801	1	-0.181397	0.816069	APL4;APL1;APL2;SLA2	Upregulated
Golgi cis cisterna (GO:0000137)	0.0131922	0.0222313	0.39818	0.970564	-0.161368	0.698423	ANP1;OCH1;GEA2	Upregulated
peroxisome (GO:0005777)	0.00209093	0.0046488	0.912723	1	-0.113067	0.697642	AAT2;VPS1;AHP1;MDH3;GPD1;FAT1;PNC1;MGM1;UBP15;DNM1;ERG8;RHO1	Upregulated
post-mRNA release spliceosomal complex (GO:0071014)	0.00220698	0.00470709	0.380826	0.970564	-0.105213	0.643498	PRP43;HRB1;PIN4;GBP2;BRR2	Upregulated
SPOTS complex (GO:0035339)	0.0131922	0.0222313	0.39818	0.970564	-0.13307	0.575944	LCB2;LCB1;SAC1	Upregulated
perinuclear endoplasmic reticulum (GO:0097038)	0.0988237	0.133559	0.635571	1	-0.23435	0.542383	DPL1;OSH3	Upregulated
THO complex part of transcription export complex (GO:0000445)	0.0743576	0.10684	0.567508	1	-0.170993	0.444389	THP2;MFT1	Upregulated
nuclear cohesin complex (GO:0000798)	0.0198909	0.0317557	0.464935	1	-0.107055	0.419389	PDS5;SMC3;SMC1	Upregulated
spliceosomal snRNP complex (GO:0097525)	0.00271685	0.00570538	0.894004	1	-0.0651727	0.385059	PRP21;SNU71;PRP11;WHI3;HSH155;WHI4;PRP28;SNU114;BRR2;CUS1;PRP8	Upregulated
spindle microtubule (GO:0005876)	0.00614522	0.0117318	0.526964	1	-0.0585365	0.298072	CDC10;CDC11;TUB3;TUB2;TUB1	Upregulated
microtubule (GO:0005874)	0.0057933	0.0112168	0.80522	1	-0.0499294	0.257189	CDC10;CDC11;EMG1;TUB4;TUB3;TUB2;TUB1;MHP1	Upregulated
AP-2 adaptor complex (GO:0030122)	0.0743576	0.10684	0.567508	1	-0.0979147	0.254468	APL1;SLA2	Upregulated
CMG complex (GO:0071162)	0.0617942	0.0916838	0.689624	1	-0.0864028	0.240541	MCM3;MCM4;MCM6	Upregulated
Rpd3L complex (GO:0033698)	0.0150847	0.0249584	0.553096	1	-0.0470942	0.197516	CTI6;UME1;RPD3;SIN3	Upregulated
early endosome (GO:0005769)	0.0150847	0.0249584	0.553096	1	-0.0340292	0.142721	SNX4;ENT1;VPS21;SWH1	Upregulated
clathrin coat of trans-Golgi network vesicle (GO:0030130)	0.0988237	0.133559	0.635571	1	-0.0562927	0.130285	APL4;APL2	Upregulated
mitochondrial inner membrane presequence translocase complex (GO:0005744)	0.00220698	0.00470709	0.380826	0.970564	-0.015553	0.0951239	TIM50;PAM17;TIM21;SSC1;TIM23	Upregulated
AP-1 adaptor complex (GO:0030121)	0.0988237	0.133559	0.635571	1	-0.0223881	0.0518155	APL4;APL2	Upregulated
DNA-directed RNA polymerase II, core complex (GO:0005665)	0.00321339	0.00664588	0.430645	1	0.00276279	-0.0158596	NPA3;RPB5;RPB2;RPB3;RPO21	Upregulated
nuclear telomeric heterochromatin (GO:0005724)	0.125135	0.162675	0.694918	1	0.010978	-0.0228163	SIR2;RVB2	Upregulated
vacuolar proton-transporting V-type ATPase, V0 domain (GO:0000220)	0.125135	0.162675	0.694918	1	0.0210409	-0.0437306	VMA6;VPH1	Upregulated
nucleolar ribonuclease P complex (GO:0005655)	0.211032	0.260686	0.826429	1	0.11293	-0.175691	POP1;RPP1	Upregulated
multivesicular body (GO:0005771)	0.38693	0.438307	0.832129	1	0.199371	-0.189305	VTA1	Upregulated
RNA polymerase I upstream activating factor complex (GO:0000500)	0.38693	0.438307	0.832129	1	0.203012	-0.192762	SPT15	Upregulated
condensed nuclear chromosome kinetochore (GO:0000778)	0.884936	0.88819	0.99993	1	2.14229	-0.261873	MAD1;GLC7	Upregulated
SCF ubiquitin ligase complex (GO:0019005)	0.846858	0.853108	0.997821	1	1.5971	-0.265473	CDC34	Upregulated
cullin-RING ubiquitin ligase complex (GO:0031461)	0.905267	0.905267	0.999966	1	2.6713	-0.265862	RTT107;CDC34	Upregulated
mitochondrial respiratory chain complex II, succinate dehydrogenase complex (ubiquinone) (GO:0005749)	0.152852	0.193188	0.746026	1	0.149052	-0.279962	SDH1;SDH2	Upregulated
chromosome, telomeric region (GO:0000781)	0.00382209	0.00772911	0.823992	1	0.0508402	-0.283026	SIR2;MFT1;RFA1;RFA2;ORC1;HEK2;SUB2;RAP1;SRC1	Upregulated
integral component of vacuolar membrane (GO:0031166)	0.592259	0.61949	0.953147	1	0.595913	-0.312145	VHC1	Upregulated
telomeric heterochromatin (GO:0031933)	0.125135	0.162675	0.694918	1	0.152422	-0.316787	SIR2;RVB2	Upregulated
nuclear inner membrane (GO:0005637)	0.152852	0.193188	0.746026	1	0.17656	-0.33163	TRL1;TRM1	Upregulated
N-terminal protein acetyltransferase complex (GO:0031414)	0.152852	0.193188	0.746026	1	0.177313	-0.333045	NAT1;MDM20	Upregulated
telomerase holoenzyme complex (GO:0005697)	0.520002	0.552375	0.921928	1	0.519453	-0.339683	POP1	Upregulated
nuclear heterochromatin (GO:0005720)	0.152852	0.193188	0.746026	1	0.181004	-0.339977	SIR2;RVB2	Upregulated
kinetochore microtubule (GO:0005828)	0.0131922	0.0222313	0.39818	0.970564	0.0800691	-0.346549	TUB3;TUB2;TUB1	Upregulated
integral component of mitochondrial outer membrane (GO:0031307)	0.0110695	0.0197169	0.728932	1	0.0796833	-0.358859	ALO1;TOM71;HFD1;POR1;GUT2;TOM70	Upregulated
microtubule organizing center (GO:0005815)	0.00211154	0.0046488	0.961639	1	0.0618455	-0.380989	MLP2;RTS1;CRM1;TPD3;TUB4;DBF2;TUB3;HRR25;TUB2;TUB1;CDC28;GLC7;BUD6;BCP1	Upregulated
vacuole (GO:0005773)	0.692796	0.703098	0.997094	1	1.11267	-0.408372	GNP1;PAH1	Upregulated
holo TFIIH complex (GO:0005675)	0.0758071	0.108353	0.733198	1	0.164891	-0.425347	TFB3;TFB1;CCL1	Upregulated
U12-type spliceosomal complex (GO:0005689)	0.181594	0.228457	0.789595	1	0.251991	-0.429891	HSH155;CUS1	Upregulated
DNA-directed RNA polymerase III complex (GO:0005666)	0.0105721	0.0192411	0.615346	1	0.0946985	-0.430835	RET1;RPO31;RPB5;RPC82;RPC40	Upregulated
clathrin-coated vesicle membrane (GO:0030665)	0.38693	0.438307	0.832129	1	0.456513	-0.433464	CHC1	Upregulated
microbody (GO:0042579)	0.00209093	0.0046488	0.912723	1	0.0760925	-0.469502	AAT2;VPS1;AHP1;MDH3;GPD1;FAT1;PNC1;MGM1;UBP15;DNM1;ERG8;RHO1	Upregulated
Set3 complex (GO:0034967)	0.520002	0.552375	0.921928	1	0.744147	-0.486615	SNT1	Upregulated
condensed nuclear chromosome outer kinetochore (GO:0000942)	0.270892	0.324358	0.883155	1	0.374104	-0.488593	SPC34;DUO1	Upregulated
perinuclear region of cytoplasm (GO:0048471)	0.0910727	0.126851	0.771792	1	0.210644	-0.504723	DPL1;OSH3;YDJ1	Upregulated
mitochondrial inner membrane protein insertion complex (GO:0042721)	0.434948	0.474963	0.869931	1	0.629739	-0.524275	TIM54	Upregulated
ISWI-type complex (GO:0031010)	0.0522389	0.0783584	0.490676	1	0.178119	-0.525795	ISW2;ITC1	Upregulated
chromatin silencing complex (GO:0005677)	0.434948	0.474963	0.869931	1	0.631787	-0.525981	SIR2	Upregulated
synaptonemal structure (GO:0099086)	0.557602	0.585482	0.939518	1	0.919905	-0.537325	TOP2	Upregulated
mitochondrial proton-transporting ATP synthase complex, coupling factor F(o) (GO:0000276)	0.653646	0.668334	0.971888	1	1.31213	-0.557904	ATP4	Upregulated
cytoplasmic microtubule (GO:0005881)	0.039108	0.0596451	0.728642	1	0.174946	-0.567074	CDC11;TUB3;TUB2;TUB1	Upregulated
RNA polymerase III transcription factor complex (GO:0090576)	0.0378824	0.0581005	0.587009	1	0.174162	-0.570079	TFC3;TFC1;SPT15	Upregulated
commitment complex (GO:0000243)	0.270892	0.324358	0.883155	1	0.439304	-0.573746	STO1;MSL5	Upregulated
histone methyltransferase complex (GO:0035097)	0.653646	0.668334	0.971888	1	1.35186	-0.574796	GIS1	Upregulated
mitotic spindle (GO:0072686)	0.240879	0.294888	0.857351	1	0.411586	-0.585876	MAD1;BCP1	Upregulated
DNA-directed RNA polymerase complex (GO:0000428)	0.0318243	0.0490849	0.690227	1	0.170484	-0.587749	RPB5;RPB3;RPC40;RPA43	Upregulated
U2-type catalytic step 2 spliceosome (GO:0071007)	0.624203	0.645483	0.963707	1	1.25841	-0.593061	NAB6	Upregulated
TRC complex (GO:0072380)	0.0131922	0.0222313	0.39818	0.970564	0.144545	-0.625608	HSP104;YDJ1;GET4	Upregulated
PAS complex (GO:0070772)	0.0743576	0.10684	0.567508	1	0.245064	-0.636889	VAC14;FAB1	Upregulated
chromosome (GO:0005694)	0.0057061	0.0111269	0.626871	1	0.123862	-0.639898	CTF4;MSH2;RAP1;MRC1;SGV1;MOT1	Upregulated
U2-type catalytic step 1 spliceosome (GO:0071006)	0.388878	0.438693	0.948811	1	0.683963	-0.645996	NAB6;PRP19	Upregulated
Golgi trans cisterna (GO:0000138)	0.434948	0.474963	0.869931	1	0.778138	-0.647822	SWH1	Upregulated
microtubule organizing center part (GO:0044450)	0.417167	0.466749	0.958587	1	0.775924	-0.678365	TUB4;BCP1	Upregulated
centrosome (GO:0005813)	0.522923	0.553326	0.982564	1	1.07024	-0.69386	TUB4;BCP1	Upregulated
nucleotide-excision repair factor 3 complex (GO:0000112)	0.479207	0.515053	0.899227	1	0.954594	-0.702221	TFB1	Upregulated
spliceosomal complex (GO:0005681)	0.00956188	0.0176378	0.860962	1	0.154838	-0.719991	PRP43;HSH155;SUB2;HRB1;PIN4;GBP2;BRR2;CUS1	Upregulated
proton-transporting V-type ATPase, V0 domain (GO:0033179)	0.125135	0.162675	0.694918	1	0.347815	-0.722886	VMA6;VPH1	Upregulated
mitochondrial outer membrane translocase complex (GO:0005742)	0.125135	0.162675	0.694918	1	0.369218	-0.76737	TOM40;TOM70	Upregulated
extrinsic component of fungal-type vacuolar membrane (GO:0097042)	0.479207	0.515053	0.899227	1	1.05708	-0.777611	SEH1	Upregulated
RNA polymerase I transcription factor complex (GO:0000120)	0.520002	0.552375	0.921928	1	1.19333	-0.780343	SPT15	Upregulated
condensed chromosome kinetochore (GO:0000777)	0.632766	0.651868	0.998774	1	1.71872	-0.786582	MAD1;NUP133;GLC7	Upregulated
multimeric ribonuclease P complex (GO:0030681)	0.211032	0.260686	0.826429	1	0.506879	-0.788575	POP1;RPP1	Upregulated
integral component of Golgi membrane (GO:0030173)	0.0206482	0.0325836	0.727814	1	0.204017	-0.79161	ERV41;GVP36;ERV46;SAC1;EMP47	Upregulated
Cul8-RING ubiquitin ligase complex (GO:0035361)	0.38693	0.438307	0.832129	1	0.84595	-0.803239	RTT107	Upregulated
Hrd1p ubiquitin ligase ERAD-L complex (GO:0000839)	0.0150847	0.0249584	0.553096	1	0.194089	-0.814023	CUE1;CDC48;UFD1;NPL4	Upregulated
ascospore wall (GO:0005619)	0.330612	0.384072	0.922282	1	0.744725	-0.824269	CDC11;CDC3	Upregulated
peroxisomal matrix (GO:0005782)	0.330612	0.384072	0.922282	1	0.747518	-0.827361	MDH3;PCS60	Upregulated
integral component of plasma membrane (GO:0005887)	0.675538	0.688141	0.999998	1	2.12259	-0.832578	YET1;YET3;YVC1;ITR1;STE2;PMC1;ZRT1	Upregulated
lysosome (GO:0005764)	0.38693	0.438307	0.832129	1	0.901747	-0.856218	YPT7	Upregulated
fungal-type vacuole lumen (GO:0000328)	0.300862	0.35867	0.904577	1	0.751807	-0.902997	APE4;PRC1	Upregulated
condensed nuclear chromosome, centromeric region (GO:0000780)	0.709421	0.717303	0.999585	1	2.64633	-0.908504	MAD1;RTS1;GLC7	Upregulated
synaptonemal complex (GO:0000795)	0.624203	0.645483	0.963707	1	1.9884	-0.937093	TOP2	Upregulated
U4/U6 x U5 tri-snRNP complex (GO:0046540)	0.0308523	0.0481297	0.870129	1	0.274467	-0.954747	PRP3;PRP4;SNU66;SNU114;BRR2;PRP8	Upregulated
site of double-strand break (GO:0035861)	0.330612	0.384072	0.922282	1	0.908659	-1.00571	SEN1;RTT103	Upregulated
mitochondrial proton-transporting ATP synthase complex (GO:0005753)	0.624203	0.645483	0.963707	1	2.13638	-1.00683	ATP4	Upregulated
U2 snRNP (GO:0005686)	0.0768598	0.108719	0.846899	1	0.392742	-1.00769	PRP21;PRP11;HSH155;CUS1	Upregulated
microbody lumen (GO:0031907)	0.330612	0.384072	0.922282	1	0.912377	-1.00983	MDH3;PCS60	Upregulated
extrinsic component of vacuolar membrane (GO:0000306)	0.211032	0.260686	0.826429	1	0.655619	-1.01998	VAC14;SEH1	Upregulated
U1 snRNP (GO:0005685)	0.267191	0.324192	0.952677	1	0.816252	-1.07728	SNU71;WHI3;WHI4	Upregulated
vacuolar lumen (GO:0005775)	0.330612	0.384072	0.922282	1	0.973874	-1.07789	APE4;PRC1	Upregulated
U5 snRNP (GO:0005682)	0.0318243	0.0490849	0.690227	1	0.316137	-1.08989	PRP28;SNU114;BRR2;PRP8	Upregulated
site of DNA damage (GO:0090734)	0.330612	0.384072	0.922282	1	1.014	-1.1223	SEN1;RTT103	Upregulated
late endosome membrane (GO:0031902)	0.557602	0.585482	0.939518	1	1.95131	-1.13978	SLM4	Upregulated
transcription factor TFIIIC complex (GO:0000127)	0.0988237	0.133559	0.635571	1	0.492716	-1.14035	TFC3;TFC1	Upregulated
small nucleolar ribonucleoprotein complex (GO:0005732)	0.00614522	0.0117318	0.526964	1	0.230267	-1.17254	NOP56;NOP58;HAS1;NOP1;PIH1	Upregulated
nuclear chromosome, telomeric region (GO:0000784)	0.0406643	0.0616742	0.90084	1	0.36874	-1.18086	SIR2;RFA1;RVB2;ORC1;HEK2;RAP1	Upregulated
pre-autophagosomal structure (GO:0000407)	0.256512	0.312624	0.979547	1	0.868834	-1.18212	SNX4;HRR25;VPS30;YPT1	Upregulated
presequence translocase-associated import motor (GO:0001405)	0.125135	0.162675	0.694918	1	0.578318	-1.20195	PAM17;SSC1	Upregulated
nuclear chromosome (GO:0000228)	0.01709	0.0279375	0.914429	1	0.299788	-1.21992	CTF4;RFA1;PDS5;RFA2;MSH2;RAP1;MRC1;MOT1	Upregulated
spindle pole body (GO:0005816)	0.00723738	0.0137209	0.982322	1	0.250156	-1.23289	MLP2;RTS1;CRM1;TPD3;TUB4;DBF2;TUB3;HRR25;TUB2;TUB1;CDC28;GLC7;BUD6	Upregulated
outer plaque of spindle pole body (GO:0005824)	0.434948	0.474963	0.869931	1	1.49511	-1.24472	TUB4	Upregulated
core mediator complex (GO:0070847)	0.0206482	0.0325836	0.727814	1	0.327701	-1.27152	MED2;RGR1;GAL11;SRB4;SRB2	Upregulated
epsilon DNA polymerase complex (GO:0008622)	0.434948	0.474963	0.869931	1	1.57152	-1.30833	POL2	Upregulated
nuclear origin of replication recognition complex (GO:0005664)	0.479207	0.515053	0.899227	1	1.79689	-1.32183	ORC1	Upregulated
nuclear telomere cap complex (GO:0000783)	0.434948	0.474963	0.869931	1	1.59083	-1.32441	RAP1	Upregulated
peroxisomal part (GO:0044439)	0.147304	0.190587	0.969612	1	0.714711	-1.36886	MDH3;PCS60;HMG1;PEX14;PEX25	Upregulated
phosphatidylinositol 3-kinase complex, class III, type I (GO:0034271)	0.38693	0.438307	0.832129	1	1.47016	-1.39593	VPS30	Upregulated
condensed chromosome, centromeric region (GO:0000779)	0.417167	0.466749	0.958587	1	1.78128	-1.55732	NUP133;RTS1	Upregulated
CHRAC (GO:0008623)	0.0743576	0.10684	0.567508	1	0.604455	-1.5709	ISW2;ITC1	Upregulated
MICOS complex (GO:0061617)	0.0988237	0.133559	0.635571	1	0.692677	-1.60314	MIC26;MIC60	Upregulated
SBF transcription complex (GO:0033309)	0.0988237	0.133559	0.635571	1	0.712585	-1.64922	SWI6;SWI4	Upregulated
late endosome (GO:0005770)	0.00382209	0.00772911	0.823992	1	0.299914	-1.66961	SEC7;VPS1;AST1;YPT52;YPT7;TDA3;SLM4;VTA1;VPS21	Upregulated
condensed chromosome (GO:0000793)	0.441974	0.480713	0.99011	1	2.0588	-1.68101	RFA1;PDS5;RFA2	Upregulated
peroxisomal membrane (GO:0005778)	0.100665	0.135301	0.887513	1	0.774573	-1.77839	PCS60;HMG1;PEX14;PEX25	Upregulated
MBF transcription complex (GO:0030907)	0.0617942	0.0916838	0.689624	1	0.639821	-1.78123	SWI6;SWI4;ASP1	Upregulated
lytic vacuole (GO:0000323)	0.00268297	0.00567792	1	1	0.300911	-1.78164	YVC1;PST1;SLG1;CWH41;PRD1;ENO1;VPH1;ENO2;YBT1;KEX1;URA8;YPT7;URA7;ADP1;YDR248C;MET5;YKT6;APE4;SNF1;APE3;CLA4;GRX6;ITR1;KTR3;GRX7;KTR1;KTR6;CTS1;PEP1;BGL2;FLC1;MPD1;PRC1;ECM14;GAS3;PEP4	Upregulated
spindle (GO:0005819)	0.0730265	0.10684	0.95171	1	0.692058	-1.81107	CDC10;CDC11;MAD1;TUB4;TUB3;TUB1	Upregulated
spliceosomal tri-snRNP complex (GO:0097526)	0.0308523	0.0481297	0.870129	1	0.536551	-1.86642	PRP3;PRP4;SNU66;SNU114;BRR2;PRP8	Upregulated
spindle pole (GO:0000922)	0.240879	0.294888	0.857351	1	1.36316	-1.94041	TUB1;BCP1	Upregulated
prespliceosome (GO:0071010)	0.090835	0.126851	0.932386	1	0.811245	-1.94594	PRP21;SNU71;PRP11;HSH155;CUS1	Upregulated
DASH complex (GO:0042729)	0.211032	0.260686	0.826429	1	1.29011	-2.00708	SPC34;DUO1	Upregulated
fungal-type cell wall (GO:0009277)	0.151668	0.193188	0.999989	1	1.115	-2.10296	PST1;CDC3;JSN1;CTS1;CDC11;CDC12;BGL2;HSP150;SSA2;GAS1;GAS3;BUD4;TDH3;TDH2	Upregulated
spore wall (GO:0031160)	0.270892	0.324358	0.883155	1	1.62047	-2.11639	CDC11;CDC3	Upregulated
storage vacuole (GO:0000322)	0.00210513	0.0046488	1	1	0.348038	-2.14509	YVC1;PST1;SLG1;CWH41;PRD1;ENO1;VPH1;ENO2;YBT1;KEX1;URA8;YPT7;URA7;ADP1;YDR248C;MET5;YKT6;APE4;SNF1;APE3;CLA4;GRX6;ITR1;KTR3;GRX7;KTR1;KTR6;CTS1;PEP1;BGL2;FLC1;MPD1;PRC1;ECM14;GAS3;PEP4	Upregulated
condensed nuclear chromosome (GO:0000794)	0.101104	0.135301	0.986027	1	0.954805	-2.18804	RFA1;PDS5;RFA2;TFC3;RTS1;SMC4;SMC2	Upregulated
COPI-coated vesicle (GO:0030137)	0.0198333	0.0317557	0.602316	1	0.566933	-2.2226	MTC1;RET2;RBD2;NEO1	Upregulated
mitochondrial envelope (GO:0005740)	0.0115577	0.0203565	0.97109	1	0.575118	-2.56526	MPM1;PTC5;CYM1;CYC3;MGM1;PDX3;PRD1;TRR1;CYC1;GPM1;CCP1	Upregulated
mitochondrial intermembrane space (GO:0005758)	0.00422138	0.0084738	0.923954	1	0.476505	-2.60533	MPM1;PTC5;CYM1;CYC3;MGM1;PDX3;PRD1;TRR1;CYC1;GPM1;CCP1	Upregulated
intrinsic component of mitochondrial outer membrane (GO:0031306)	0.0110695	0.0197169	0.728932	1	0.584659	-2.63305	ALO1;TOM71;HFD1;POR1;GUT2;TOM70	Upregulated
clathrin-coated vesicle (GO:0030136)	0.0768598	0.108719	0.846899	1	1.11702	-2.86601	BCH1;GYP6;SLA2;AGE2	Upregulated
U2-type spliceosomal complex (GO:0005684)	0.0511786	0.077192	0.988064	1	1.01244	-3.0094	PRP21;SNU71;NAB6;PRP11;HSH155;STO1;MSL5;PRP19;CUS1	Upregulated
Rpd3L-Expanded complex (GO:0070210)	0.016789	0.0276109	0.693202	1	0.767763	-3.13787	CTI6;UME1;RPD3;SIN3;SNT1	Upregulated
U2-type prespliceosome (GO:0071004)	0.090835	0.126851	0.932386	1	1.34173	-3.21842	PRP21;SNU71;PRP11;HSH155;CUS1	Upregulated

## Sheet: Down_GOBP_Proteome
Term	P-value	Adjusted P-value	Old P-value	Old Adjusted P-value	Z-score	Combined Score	Genes	Enrichment
cytoplasmic translation (GO:0002181)	3.91e-78	2e-75	1.91e-22	1.95e-19	-1.78694	318.501	RPL30;RPL32;RPL14A;RPL26B;RPP2A;RPL14B;RPL22A;RPL34B;RPP2B;RPL22B;RPL42B;RPS0B;RPS0A;RPL7B;RPS15;RPS25A;RPS9A;RPS21B;RPL38;RPS17B;RPS29B;RPS13;RPS12;RPL37B;RPL13A;RPS7B;TMA46;RPL13B;RPP1B;RPL33A;RPP1A;RPL21A;RPL33B;RPL21B;RPL6A;RPS24B;RPL6B;RPS16B;RPL17B;RPS8B;RPL2B;RPL37A;RPL25;RPL29;RPL28;RPL40B;RPL10;RPL36A;RPS6B;RPL24A;RPL36B;RPL24B;RPL12B;RPL20B;RPS27B;TMA19;RPL16A;RPS11B;RPS7A;SSA1;RPS31;RP…	Downregulated
translation (GO:0006412)	9.08e-81	9.29e-78	2.44e-19	1.25e-16	-1.40842	259.576	RPL30;RPL32;RPP2A;RPL22A;RPL34B;RPP2B;RPL22B;RPS0B;RPS0A;RPS15;RPS25A;RPS9A;RPL38;RPS13;RPS12;RPS7B;RPP1B;RPL33A;RPP1A;RPL21A;RPL33B;RPL21B;RPS24B;RPL17B;RPS8B;RPL2B;NHP2;RPL25;RPL29;RPL28;MRPL19;SNU13;RPL20B;MRPL20;RPL16A;RPS11B;SSA1;RPS23B;RPS31;RPS19A;MNP1;MRPL27;RPL15B;TMA7;MRPL25;RPL31A;RPL43B;RPL31B;MMF1;MRPL31;RPL27A;RPS10A;RPS22B;RPS20;HCR1;RPS18B;STM1;RPL14A;RPL26B;RPL14B;RPL42B;MRPL33;R…	Downregulated
ribonucleoprotein complex assembly (GO:0022618)	4.03e-36	1.38e-33	2.01e-08	6.86e-06	-1.43651	117.073	NSR1;RPS0B;RPS0A;RPS15;TIF11;THO1;RPL38;RPS17B;BUD27;MRN1;RPL6A;RPL6B;RSA3;RPL25;SLU7;DCP2;RPL40B;TIF4631;FUN12;TIF4632;RPL10;NIP7;MRPL19;RPL24A;RPL24B;RPL12B;SUI3;SUI1;RPS27B;RPB4;RPS11B;RPS31;RPS19A;MRT4;SCD6;TMA20;TMA22;DBP10;RPL11B;LSM4;LSM3;SMD2;NOG1;SMD3;RPS14A;RPS26A;RPS10A;SKY1;ESF2;STE20;RSM19	Downregulated
ribosome biogenesis (GO:0042254)	1.97e-35	5.05e-33	1.01e-07	2.06e-05	-1.36085	108.747	LTV1;NSR1;POP6;RPL30;ALB1;DHR2;POP4;SDA1;RPL14A;RPL26B;RPL14B;RPL34B;RPS0B;YAR1;RPS0A;RPL7B;RPS15;RRP14;CGR1;RRP17;EBP2;IMP3;RPS7B;RPL33A;RPL33B;LOC1;NSA2;RPL40B;NOP4;TIF4631;FUN12;NOP6;NIP7;MAK16;NOP7;RPS7A;RRS1;RRP36;RPS31;REI1;TRM112;RPS19A;MRT4;NOP15;NOP16;TMA20;TMA23;NOG1;RPS26A;RPS10A;ESF1;NOP53;RPS18B	Downregulated
ribosomal large subunit biogenesis (GO:0042273)	1.67e-30	3.41e-28	5.52e-08	1.41e-05	-1.57016	107.66	RPL40B;NOP4;TIF4631;ALB1;RPL10;NIP7;MAK16;MRPL19;SDA1;RPL14A;RPL26B;RPL14B;RPL24A;RPL24B;SNU13;RPL12B;NOP7;RPL7B;RRS1;RRP14;REI1;TRM112;RRP15;EBP2;MRT4;NOP15;NOP16;RPL33A;RPL11B;RPL33B;NOG1;RPL6A;LOC1;NSA2;RPL6B;RSA3;NHP2;RPL25;RPL8A	Downregulated
maturation of SSU-rRNA from tricistronic rRNA transcript (SSU-rRNA, 5.8S rRNA, LSU-rRNA) (GO:0000462)	4.47e-29	7.63e-27	1.73e-07	2.95e-05	-1.52775	99.7268	FAP7;FUN12;DHR2;FAF1;UTP23;RPS6B;FCF2;SNU13;EFG1;KRI1;NOP7;RPS0B;RPS0A;RPS27B;RPS9A;SAS10;FYV7;RPS21B;RPS11B;RPS23B;RRS1;BUD21;RRP36;SLX9;RPS13;UTP14;UTP11;NOP19;RPS24B;LOC1;RPS14A;RPS16B;RPS8B;ESF2;RPS20;HCR1;RPS18B;LCP5	Downregulated
ribosome assembly (GO:0042255)	2.91e-20	3.72e-18	1.63e-05	0.00185352	-1.66697	74.9871	NSR1;RPL40B;FUN12;RPL10;MRPL19;RPL24A;RPL24B;RPL12B;RPS0B;RPS0A;RPS15;RPS27B;RPS11B;RPS31;RPS17B;RPS19A;MRT4;RPL11B;RPL6A;RPS14A;RPL6B;RPS26A;RSA3;RPS10A;RPL25;RSM19	Downregulated
maturation of SSU-rRNA (GO:0030490)	1.69e-22	2.46e-20	7.74e-06	0.00113147	-1.49017	74.7097	FAP7;FUN12;DHR2;FAF1;RPS6B;SNU13;EFG1;NOP7;RPS27B;RPS9A;SAS10;FYV7;RPS11B;RPS23B;BUD21;RRP36;RPS31;SLX9;TRM112;RPS13;NOP19;RPS24B;LSM7;RPS14A;LSM6;RPS16B;RPS8B;RPS20;HCR1;LCP5	Downregulated
ribosomal small subunit biogenesis (GO:0042274)	6.09e-20	6.92e-18	1.51e-05	0.00185352	-1.63432	72.3099	LTV1;NSR1;NOP6;SNU13;RPS0B;YAR1;RPS0A;RPS15;RPS27B;RPS11B;RPS7A;RRP14;RRP36;RPS31;RPS17B;TRM112;RPS19A;IMP3;RPS7B;TMA23;LSM7;RPS14A;LSM6;RPS10A;RSM19	Downregulated
maturation of 5.8S rRNA from tricistronic rRNA transcript (SSU-rRNA, 5.8S rRNA, LSU-rRNA) (GO:0000466)	6.7e-18	6.85e-16	0.000219507	0.018138	-1.40761	55.6636	LRP1;MAK16;UTP23;FCF2;KRI1;RPS0B;RPS0A;SAS10;RPS21B;RRS1;BUD21;RRP15;UTP14;UTP11;NOP19;RPL37B;SPB1;DBP10;MPP6;LOC1;NSA2;RPL17B;RPL37A;ESF2;RPS18B;LCP5	Downregulated
endonucleolytic cleavage of tricistronic rRNA transcript (SSU-rRNA, 5.8S rRNA, LSU-rRNA) (GO:0000479)	1.31e-15	1.12e-13	0.000210711	0.018138	-1.51808	52.0234	UTP14;UTP11;NOP19;UTP23;RPL37B;FCF2;KRI1;RPS0B;RPS0A;LOC1;RPS27B;SAS10;RPS21B;RPL17B;RPL37A;RRS1;BUD21;ESF2;RPS18B;LCP5	Downregulated
transcription from RNA polymerase II promoter (GO:0006366)	1.01e-16	9.37e-15	0.00248284	0.110432	-1.39313	51.315	TFB5;REB1;CTR9;SUS1;RPB10;DST1;ESS1;RPB11;RPC10;LDB7;RBA50;RPB8;RTT102;RPB4;RPB5;LEO1;TFG2;TFG1;TAF14;TFA2;TAF13;TFA1;TOA2;TOA1;ELF1;HPC2;SUB1;RPO26;TBF1	Downregulated
ribosomal small subunit assembly (GO:0000028)	3.15e-12	1.89e-10	0.000439015	0.0299408	-1.87316	49.6095	NSR1;RPS0B;RPS0A;RPS15;RPS14A;RPS27B;RPS10A;RPS11B;ESF2;RPS31;RPS17B;RSM19;RPS19A	Downregulated
transcription initiation from RNA polymerase II promoter (GO:0006367)	1.1e-12	7.49e-11	0.000961749	0.0517826	-1.7033	46.9037	NCB2;TAF14;REB1;TFA2;TAF13;TFA1;HMO1;BUR6;TOA2;DST1;NHP6A;TOA1;MED11;RPB4;TFG2;TFG1	Downregulated
rRNA processing (GO:0006364)	2.78e-14	2.18e-12	0.0093942	0.252902	-1.43811	44.8914	NSR1;POP6;RPL30;POP4;MAK16;SNU13;RPL7B;RPS7A;RRP36;CGR1;RRP17;TRM112;RRP15;EBP2;MRT4;IMP3;RPS7B;NOG1;LSM7;NSA2;LSM6;NHP2;ESF1;NOP53;NOP10;RPL8A	Downregulated
cellular response to oxidative stress (GO:0034599)	6.69e-12	3.26e-10	0.0166689	0.355257	-1.68485	43.3529	LTV1;YAP1;FAP7;GPX2;NQM1;GRX2;GRX1;TSA1;GRX5;DOT5;CMK2;MXR1;YAR1;MXR2;TRX1;ATX1;HYR1;TMA19;HSP12;HSP31;TRX3	Downregulated
ATP biosynthetic process (GO:0006754)	6.91e-11	2.72e-09	0.000567614	0.034157	-1.8342	42.9129	ATP20;ATP7;ATP5;ATP17;ATP16;ATP15;TIM11;ATP14;ATP19;ATP18	Downregulated
cellular protein complex assembly (GO:0043623)	1.51e-12	9.65e-11	0.0125648	0.298926	-1.48197	40.3387	SEC65;TOM5;MDM35;CMC2;BLM10;BNI5;USO1;CLC1;GIM4;GIM3;GIM5;RBL2;SEM1;PAC10;YKE2;IRC25;DYN2;HSP10;SBA1;COX13;BUD27;SKP1	Downregulated
ATP synthesis coupled proton transport (GO:0015986)	8.64e-12	4.02e-10	0.000321763	0.0235116	-1.56738	39.9292	ATP20;ATP7;ATP5;COX4;ATP17;ATP16;ATP15;TIM11;ATP14;ATP19;ATP18	Downregulated
transcription, DNA-templated (GO:0006351)	3.45e-12	1.96e-10	0.0125326	0.298926	-1.51006	39.8556	TAF14;TFB5;TFA2;RPC19;TAF13;TFA1;CTR9;RPB10;DST1;RPA12;RPB11;RPC10;TOA1;RBA50;RPA14;THO1;RPB8;RPB4;RPB5;LEO1;RPO26	Downregulated
endonucleolytic cleavage in ITS1 to separate SSU-rRNA from 5.8S rRNA and LSU-rRNA from tricistronic rRNA transcript (SSU-rRNA, 5.8S rRNA, LSU-rRNA) (GO:0000447)	4.92e-13	3.6e-11	0.000651406	0.0370216	-1.40193	39.7308	UTP14;UTP11;NOP19;UTP23;FCF2;KRI1;RPS0B;RPS0A;LOC1;SAS10;RPS21B;RRS1;BUD21;ESF2;RPS18B;LCP5	Downregulated
transcription from RNA polymerase III promoter (GO:0006383)	5.39e-10	1.72e-08	0.00220414	0.102492	-1.81205	38.6725	RPC37;RPB8;RPC17;RPC19;RPB5;RPB10;RPC31;RPC53;DST1;RPC10;RPO26	Downregulated
maturation of LSU-rRNA from tricistronic rRNA transcript (SSU-rRNA, 5.8S rRNA, LSU-rRNA) (GO:0000463)	2.24e-10	7.67e-09	0.00533849	0.18832	-1.70038	37.7792	NOP4;NIP7;MAK16;RPL37B;RPL35B;SPB1;DBP10;NOP7;RPL7B;NSA2;RPL17B;RPL37A;NOP53;RRP15	Downregulated
tRNA transcription from RNA polymerase III promoter (GO:0042797)	4.01e-12	2.05e-10	0.000230493	0.018138	-1.43217	37.5834	RPC37;RPB8;RPC17;RPC19;RPB5;RPB10;RPC31;RPC53;DST1;RPC10;RPO26	Downregulated
maturation of LSU-rRNA (GO:0000470)	8.76e-11	3.32e-09	0.00520021	0.18832	-1.61502	37.401	NOP4;NIP7;MAK16;RPL35B;SNU13;SPB1;DBP10;NOP7;RPL7B;NSA2;NHP2;NOP53;TRM112;RPL8A;RRP15	Downregulated
tRNA transcription (GO:0009304)	4.01e-12	2.05e-10	0.000230493	0.018138	-1.42448	37.3819	RPC37;RPB8;RPC17;RPC19;RPB5;RPB10;RPC31;RPC53;DST1;RPC10;RPO26	Downregulated
protein targeting to mitochondrion (GO:0006626)	3.05e-10	1.01e-08	0.0141063	0.320305	-1.69337	37.1016	MGE1;OM14;TOM5;PAM18;TIM9;PAM16;TIM8;STI1;ZIM17;TIM10;SSA1;TOM22;TIM13;HSP10;MGR2;MIA40	Downregulated
vesicle-mediated transport (GO:0016192)	2.25e-10	7.67e-09	0.372723	0.999999	-1.60927	35.7494	ARF2;SSO1;SSO2;USO1;CMD1;COF1;EDE1;DID2;BOS1;VPS51;DID4;SDS24;SSA4;SSA1;VAM3;NEO1;YKT6;TLG1;TPM2;SCD5;TPM1;CLC1;SNF7;IMH1;BZZ1;PAN1;YCK1;VPS24;COY1	Downregulated
energy coupled proton transport, down electrochemical gradient (GO:0015985)	6.91e-11	2.72e-09	0.000567614	0.034157	-1.47065	34.4073	ATP20;ATP7;ATP5;ATP17;ATP16;ATP15;TIM11;ATP14;ATP19;ATP18	Downregulated
inner mitochondrial membrane organization (GO:0007007)	2.06e-09	6.01e-08	0.00423988	0.178877	-1.69288	33.8624	ATP20;MIC19;TIM10;TIM9;MIC12;TIM8;TIM13;MIC10;TIM11;ATP14;MGR2	Downregulated
ribosomal subunit export from nucleus (GO:0000054)	5.74e-10	1.78e-08	0.00840029	0.232257	-1.57399	33.4915	LTV1;RPL40B;YRB2;ECM1;NSP1;BUD20;SDA1;NUP1;YAR1;NOG1;LOC1;RRS1;SLX9;NOP53	Downregulated
mitochondrial respiratory chain complex assembly (GO:0033108)	2.62e-11	1.12e-09	0.00187847	0.0915083	-1.37107	33.4047	MDM35;CMC2;SDH7;COX17;SDH8;QCR7;MZM1;COX12;SDH5;CBP6;COX14;CBP4;PET191;COA6	Downregulated
respiratory electron transport chain (GO:0022904)	1.61e-10	5.88e-09	0.00454625	0.178877	-1.47416	33.2415	QCR10;COX5B;COX5A;COX9;QCR7;QCR6;COX6;CYC7;COX4;SDH5;COX13;CYC1;QCR8;RIP1	Downregulated
transcription from RNA polymerase I promoter (GO:0006360)	2.74e-09	7.79e-08	0.00758902	0.221816	-1.66086	32.7444	RPB8;REB1;RPC19;CTR9;RPB5;RPB10;DST1;RPA12;RPA34;RPC10;RPO26;RPA14	Downregulated
negative regulation of Arp2/3 complex-mediated actin nucleation (GO:0034316)	9.08e-07	1.22e-05	0.00694714	0.209027	-2.31819	32.2505	BBC1;LSB1;PIN3;AIM7;CRN1	Downregulated
mitochondrial electron transport, cytochrome c to oxygen (GO:0006123)	5.74e-08	1.25e-06	0.00581197	0.198188	-1.90938	31.8361	COX9;COX6;CYC7;COX4;COX13;CYC1;COX5B;COX5A	Downregulated
mitochondrial ATP synthesis coupled electron transport (GO:0042775)	2.62e-11	1.12e-09	0.00187847	0.0915083	-1.29657	31.5894	QCR10;COX5B;COX5A;COX9;QCR7;QCR6;COX6;CYC7;COX4;SDH5;COX13;CYC1;QCR8;RIP1	Downregulated
tubulin complex assembly (GO:0007021)	6.19e-07	9.05e-06	0.0079768	0.226674	-2.2084	31.5685	RBL2;PAC10;YKE2;GIM4;GIM3;GIM5	Downregulated
regulation of Arp2/3 complex-mediated actin nucleation (GO:0034315)	7.54e-08	1.48e-06	0.0044221	0.178877	-1.88927	30.9859	BBC1;PAN1;LSB1;PIN3;ABP1;AIM7;CRN1	Downregulated
peptide biosynthetic process (GO:0043043)	6.37e-08	1.33e-06	0.0228402	0.396026	-1.86803	30.9517	RPS14A;RPS23B;MRPL27;NHP2;RPL24A;RPL24B;SNU13;RRF1;RPL8A;RPS0B;RPS0A	Downregulated
ribosomal large subunit assembly (GO:0000027)	1.33e-08	3.31e-07	0.0163459	0.355257	-1.66961	30.2829	RPL40B;RPL6A;MRT4;RPL6B;RPL10;RSA3;MRPL19;RPL25;RPL24A;RPL24B;RPL12B;RPL11B	Downregulated
establishment of protein localization to mitochondrion (GO:0072655)	9.87e-09	2.59e-07	0.0141698	0.320305	-1.54142	28.4138	MGE1;ZIM17;OM14;TOM5;PAM18;SSA1;TOM22;PAM16;HSP10;MGR2;MIA40;STI1	Downregulated
DNA-templated transcription, initiation (GO:0006352)	6.54e-09	1.76e-07	0.00481377	0.182388	-1.46998	27.7016	TAF14;RPC17;TFA2;RPB4;TFG2;RPC31;TFG1;TOA2;DST1;TOA1	Downregulated
intracellular mRNA localization (GO:0008298)	3.19e-08	7.41e-07	0.00674293	0.209027	-1.56724	27.0521	NUP60;LOC1;LRP1;SHE3;TPM2;SUS1;TPM1;SPT4;BFR1	Downregulated
positive regulation of transcription from RNA polymerase II promoter (GO:0045944)	9.68e-10	2.91e-08	0.657919	0.999999	-1.29506	26.8799	KAE1;NCB2;PFD1;SUS1;GIM3;GIM5;DST1;ESS1;CST6;EMI1;MED11;CYC8;CBF1;LEO1;SDH5;CRZ1;TFG2;SPT4;BUD27;CSE2;MBF1;MLP1;PCC1;BUR6;HAA1;RTG1;TOA2;SRB7;SRB6;SUB1;YKE2;DCP2	Downregulated
negative regulation of actin nucleation (GO:0051126)	9.08e-07	1.22e-05	0.00694714	0.209027	-1.91414	26.6293	BBC1;LSB1;PIN3;AIM7;CRN1	Downregulated
intracellular protein transport (GO:0006886)	1.46e-07	2.58e-06	0.473633	0.999999	-1.66735	26.2461	YRB2;YRB1;NSP1;ARF2;PEX19;MLP1;NUP100;SSO1;SSO2;TLG1;USO1;CMD1;SAR1;NUP1;NUP2;NUP60;SIS1;PBS2;SSA1;VAM3;SLO1	Downregulated
mitochondrial transport (GO:0006839)	4.58e-09	1.27e-07	0.0327736	0.50381	-1.36246	26.1608	MGE1;OM14;TOM5;PAM18;MNP1;PAM16;STI1;ZIM17;MPC1;SSA1;TOM22;COX4;HSP10;MGR2;MIA40	Downregulated
mitochondrial translation (GO:0032543)	1.59e-08	3.88e-07	0.139581	0.921232	-1.45352	26.0976	MNP1;MRPL19;MRPL27;MRPL49;MRP21;MRPL25;IMG2;RRF1;MMF1;MRPL33;MRPL20;MRPL31;MRPL50;MRPS8;YMR31;RSM18;RSM27;RSM19	Downregulated
cellular macromolecule biosynthetic process (GO:0034645)	7.27e-08	1.46e-06	0.104614	0.837996	-1.57664	25.9145	RFA3;STM1;MRPL27;RPL24A;RPL24B;SNU13;RRF1;RPS0B;RPS0A;EFB1;THO1;RPS14A;RPS23B;NHP2;RPL8A	Downregulated
mitochondrial gene expression (GO:0140053)	2.17e-08	5.15e-07	0.155237	0.954897	-1.44657	25.5294	MNP1;MRPL19;MRPL27;MRPL49;MRP21;MRPL25;IMG2;RRF1;MMF1;MRPL33;MRPL20;MRPL31;MRPL50;MRPS8;YMR31;RSM18;RSM27;RSM19	Downregulated
ribosomal large subunit export from nucleus (GO:0000055)	3.25e-07	5.36e-06	0.0213636	0.378626	-1.70408	25.4573	RPL40B;ECM1;LOC1;NSP1;BUD20;SDA1;RRS1;NUP1;NOP53	Downregulated
DNA-templated transcriptional start site selection (GO:0001173)	2.35e-06	2.67e-05	0.0102668	0.262575	-1.83327	23.7586	TAF14;REB1;HMO1;TFG2;TFG1	Downregulated
gene expression (GO:0010467)	1.24e-08	3.17e-07	0.0962793	0.827495	-1.30034	23.6742	YRA1;NUP100;MRPL27;RPL24A;RPL24B;SNU13;GFD1;RRF1;RPS0B;RPS0A;SEM1;THO1;LSM7;RPS14A;RPS23B;NHP2;RPL8A	Downregulated
mitochondrial electron transport, ubiquinol to cytochrome c (GO:0006122)	1.46e-07	2.58e-06	0.00600573	0.198189	-1.50393	23.6685	QCR7;QCR6;CYC7;QCR10;CYC1;QCR8;RIP1	Downregulated
DNA-templated transcriptional preinitiation complex assembly (GO:0070897)	4.76e-08	1.08e-06	0.0198434	0.378626	-1.39985	23.6009	MED11;NCB2;TAF14;TAF13;SUB1;BUR6;TFG2;TFG1;TOA2;NHP6A;TOA1	Downregulated
mRNA splicing, via spliceosome (GO:0000398)	3.09e-07	5.18e-06	0.230735	0.992588	-1.55854	23.364	SNU13;CWC15;MRN1;LSM4;LSM3;SMD2;LSM2;SMD3;LSM7;LSM6;YHC1;SYF2;SKY1;BUD13;SPT4;HUB1	Downregulated
cytoplasmic translational initiation (GO:0002183)	1.85e-06	2.2e-05	0.0207404	0.378626	-1.76778	23.3359	TIF11;FUN12;TMA20;SUI3;TMA22;SUI1;BUD27	Downregulated
regulation of transcription from RNA polymerase II promoter (GO:0006357)	6.23e-08	1.33e-06	0.938712	0.999999	-1.40251	23.2705	KAE1;NCB2;TFB5;REB1;CTR9;SUS1;ESS1;RPA12;CST6;DOT6;EMI1;MED11;CYC8;CBF1;SDH5;CRZ1;REG1;TFG1;BUD27;CSE2;MBF1;PCC1;TAF13;TFA1;HMO1;SPN1;BUR6;HAA1;RTG1;TOA2;SRB7;SRB6;SUB1	Downregulated
transcriptional start site selection at RNA polymerase II promoter (GO:0001174)	2.35e-06	2.67e-05	0.0102668	0.262575	-1.78825	23.1752	TAF14;REB1;HMO1;TFG2;TFG1	Downregulated
positive regulation of transcription, DNA-templated (GO:0045893)	6.5e-08	1.33e-06	0.750371	0.999999	-1.386	22.937	KAE1;NCB2;DHR2;NUP100;SUS1;ESS1;CST6;EMI1;MED11;CYC8;CBF1;SDH5;CRZ1;BUD27;CSE2;HHO1;MBF1;PCC1;BUR6;HAA1;RTG1;TOA2;ELF1;SRB7;SRB6;SUB1;TBF1	Downregulated
organelle assembly (GO:0070925)	4.82e-07	7.47e-06	0.16069	0.966979	-1.54627	22.4906	TIF4631;ATG27;FUN12;TIF4632;SCD6;BNI5;LSM4;LSM3;RPS26A;DYN2;ATG8;STE20;DCP2;SKP1	Downregulated
rRNA export from nucleus (GO:0006407)	1.85e-06	2.2e-05	0.0207404	0.378626	-1.677	22.1377	RPS15;RPS26A;RPS10A;RPS18B;RPS0B;RPS0A;RPS19A	Downregulated
protein transmembrane import into intracellular organelle (GO:0044743)	3.56e-07	5.69e-06	0.105372	0.837996	-1.48934	22.115	MGE1;PEX19;PAM18;TIM9;PAM16;TIM8;ZIM17;TIM10;TOM22;TIM13;HSP10;MGR2;MIA40	Downregulated
aerobic respiration (GO:0009060)	1.07e-07	2.03e-06	0.0437206	0.602844	-1.36824	21.9619	MIX14;QCR7;QCR6;MDH1;COX17;COX4;JAC1;QCR10;COX13;QCR8;RIB3;RIP1	Downregulated
actin filament organization (GO:0007015)	1.11e-06	1.42e-05	0.059036	0.695629	-1.58705	21.7671	BZZ1;ARC18;PBS2;TPM2;SCD5;SCP1;TPM1;COF1;RDI1;CRN1	Downregulated
formation of translation preinitiation complex (GO:0001731)	1.2e-06	1.52e-05	0.0108573	0.270902	-1.57648	21.489	TIF11;TMA20;SUI3;TMA22;SUI1;BUD27	Downregulated
endonucleolytic cleavage in 5'-ETS of tricistronic rRNA transcript (SSU-rRNA, 5.8S rRNA, LSU-rRNA) (GO:0000480)	8.31e-07	1.16e-05	0.0339813	0.50381	-1.52193	21.3087	UTP14;LOC1;SAS10;UTP11;NOP19;UTP23;FCF2;ESF2;LCP5	Downregulated
RNA export from nucleus (GO:0006405)	8.47e-08	1.63e-06	0.0808969	0.798176	-1.28757	20.9675	YRA1;YRB1;NSP1;NUP100;NUP1;GFD1;RPS0B;RPS0A;RPS15;SEM1;RPS26A;RPS10A;RPS18B;RPS19A	Downregulated
mitochondrion organization (GO:0007005)	1.34e-07	2.45e-06	0.27748	0.999999	-1.31673	20.8378	FIS1;OM14;TOM5;MDM35;CMC2;SAR1;STI1;UTH1;EMI1;ZIM17;ABF2;SSA1;MAM3;SML1;ATP14;COX13;RIM1;ATP18	Downregulated
protein transport (GO:0015031)	2.68e-07	4.57e-06	0.22035	0.992588	-1.37355	20.7842	YRB2;YRB1;ARF2;SSO1;SSO2;TLG1;USO1;COF1;SAR1;NUP2;IMH1;DID2;DID4;VAM3;VPS24;SLO1	Downregulated
cristae formation (GO:0042407)	2.17e-06	2.52e-05	0.0144028	0.320305	-1.58354	20.6513	ATP20;MIC19;MIC12;MIC10;TIM11;ATP14	Downregulated
stress granule assembly (GO:0034063)	2.97e-05	0.000264102	0.0338812	0.50381	-1.97397	20.5781	TIF4631;TIF4632;SCD6;STE20;DCP2	Downregulated
mRNA export from nucleus (GO:0006406)	5.75e-08	1.25e-06	0.0687973	0.736329	-1.23247	20.547	YRA1;NSP1;YRA2;MLP1;NUP100;SPN1;SUS1;NUP1;GFD1;NUP2;SEM1;NUP60;THO1;RPB4	Downregulated
RNA polymerase II transcriptional preinitiation complex assembly (GO:0051123)	1.71e-07	2.97e-06	0.0241089	0.404318	-1.31084	20.4238	MED11;NCB2;TAF14;TAF13;BUR6;TFG2;TFG1;TOA2;NHP6A;TOA1	Downregulated
metallo-sulfur cluster assembly (GO:0031163)	8.04e-07	1.14e-05	0.0214666	0.378626	-1.45294	20.39	ISD11;ISU1;ISU2;JAC1;YAH1;GRX5;DRE2;ACP1	Downregulated
DNA-templated transcription, elongation (GO:0006354)	1.03e-06	1.35e-05	0.117958	0.837996	-1.43638	19.7996	ELF1;TAF14;RTT102;HPC2;CTR9;SUS1;LEO1;TFG2;TFG1;DST1;RPA34;LDB7	Downregulated
iron-sulfur cluster assembly (GO:0016226)	8.04e-07	1.14e-05	0.0214666	0.378626	-1.40696	19.7448	ISD11;ISU1;ISU2;JAC1;YAH1;GRX5;DRE2;ACP1	Downregulated
cellular response to heat (GO:0034605)	1.23e-07	2.29e-06	0.0942846	0.827495	-1.23734	19.6883	NCB2;NUP100;HCH1;BUR6;NUP2;NUP60;HSP26;PBS2;SSA4;RPB4;SSA1;UBC4;STE20;HSP12	Downregulated
nuclear export (GO:0051168)	1.09e-05	0.000108675	0.0509138	0.635972	-1.72323	19.6843	YRB2;NUP60;YRB1;NSP1;NUP100;NUP1;NUP2	Downregulated
rRNA metabolic process (GO:0016072)	3.66e-07	5.76e-06	0.19073	0.992588	-1.32593	19.6517	NSR1;POP6;MRT4;RPL30;IMP3;POP4;RPS7B;NOG1;RPS7A;ESF1;CGR1;HHT1;RRP17;NOP53;EBP2	Downregulated
actomyosin contractile ring assembly (GO:0000915)	4.69e-05	0.000393175	0.0427366	0.598898	-1.96271	19.5638	NOP15;TPM2;TPM1;MLC1;PFY1	Downregulated
assembly of large subunit precursor of preribosome (GO:1902626)	1.78e-05	0.000171976	0.0262623	0.428945	-1.77952	19.4594	NIP7;RPL24A;RPL24B;DBP10;NOG1	Downregulated
endonucleolytic cleavage to generate mature 5'-end of SSU-rRNA from (SSU-rRNA, 5.8S rRNA, LSU-rRNA) (GO:0000472)	1.11e-06	1.42e-05	0.0391351	0.563877	-1.38455	18.9867	UTP14;LOC1;SAS10;UTP11;NOP19;UTP23;BUD21;FCF2;ESF2	Downregulated
negative regulation of protein polymerization (GO:0032272)	1.91e-05	0.000181345	0.0186979	0.378626	-1.73091	18.8037	AIM21;BIK1;TDA2;BUD14	Downregulated
cellular protein metabolic process (GO:0044267)	3.56e-07	5.69e-06	0.105372	0.837996	-1.26177	18.7359	MRPL27;RPL24A;RPL24B;SNU13;RRF1;RPS0B;RPS0A;RPS14A;CPR1;RPS23B;NHP2;HUB1;RPL8A	Downregulated
cofactor biosynthetic process (GO:0051188)	1.61e-06	2.01e-05	0.0303821	0.478167	-1.40116	18.6927	ISD11;ISU1;ISU2;JAC1;YAH1;GRX5;DRE2;ACP1	Downregulated
protein import into mitochondrial inner membrane (GO:0045039)	4.69e-05	0.000393175	0.0427366	0.598898	-1.8677	18.6167	TIM10;TIM9;TIM8;TIM13;MGR2	Downregulated
ncRNA processing (GO:0034470)	5.68e-07	8.42e-06	0.221778	0.992588	-1.28438	18.4718	NSR1;POP6;MRT4;RPL30;IMP3;POP4;RPS7B;NOG1;RPS7A;ESF1;CGR1;RRP17;NOP53;LHP1;EBP2	Downregulated
rRNA transport (GO:0051029)	1.85e-06	2.2e-05	0.0207404	0.378626	-1.37701	18.1775	RPS15;RPS26A;RPS10A;RPS18B;RPS0B;RPS0A;RPS19A	Downregulated
chromatin remodeling (GO:0006338)	5.65e-07	8.42e-06	0.170383	0.9832	-1.24272	17.8788	NCB2;TAF14;CHZ1;SWR1;MRN1;NHP6A;LDB7;ELF1;ABF2;CYC8;CBF1;RTT102;NHP10;DPB4	Downregulated
RNA splicing, via transesterification reactions with bulged adenosine as nucleophile (GO:0000377)	4.91e-07	7.5e-06	0.211191	0.992588	-1.22864	17.8473	SNU13;CWC15;MRN1;LSM4;LSM3;SMD2;LSM2;SMD3;LSM7;LSM6;YHC1;SYF2;BUD13;SPT4;HUB1	Downregulated
rRNA 5'-end processing (GO:0000967)	1.91e-06	2.24e-05	0.0509773	0.635972	-1.34179	17.6709	UTP14;LOC1;SAS10;UTP11;NOP19;UTP23;BUD21;FCF2;ESF2	Downregulated
regulation of transcription elongation from RNA polymerase II promoter (GO:0034243)	4.97e-06	5.25e-05	0.116813	0.837996	-1.4448	17.6427	PFD1;SPN1;SUB1;YKE2;LEO1;GIM3;TFG2;GIM5;SPT4;DST1	Downregulated
negative regulation of cytoskeleton organization (GO:0051494)	4.35e-05	0.000370503	0.0268353	0.428945	-1.75431	17.6197	EFB1;AIM21;TDA2;BUD14	Downregulated
peptide transport (GO:0015833)	5.97e-06	6.14e-05	0.02375	0.404318	-1.4645	17.6172	YRB2;YRB1;DID2;DID4;VPS24;NUP2	Downregulated
mRNA processing (GO:0006397)	1.72e-06	2.12e-05	0.456012	0.999999	-1.32056	17.5258	CTR9;SNU13;CWC15;MRN1;LSM4;LSM3;SMD2;LSM2;SMD3;LSM7;LSM6;YHC1;SYF2;RTT103;BUD13;SPT4;HUB1	Downregulated
negative regulation of actin filament polymerization (GO:0030837)	1.91e-05	0.000181345	0.0186979	0.378626	-1.61248	17.5171	AIM21;TDA2;PFY1;BUD14	Downregulated
cellular respiration (GO:0045333)	1.03e-06	1.35e-05	0.117958	0.837996	-1.26554	17.4446	MIX14;QCR7;QCR6;MDH1;COX17;COX4;JAC1;QCR10;COX13;QCR8;RIB3;RIP1	Downregulated
negative regulation of supramolecular fiber organization (GO:1902904)	1e-05	0.000100307	0.0198333	0.378626	-1.515	17.4418	EFB1;AIM21;BIK1;TDA2;BUD14	Downregulated
rRNA-containing ribonucleoprotein complex export from nucleus (GO:0071428)	4.03e-06	4.34e-05	0.0480428	0.620995	-1.40235	17.4186	RPS15;RPS26A;RPS10A;RPS18B;RPS0B;NOG1;RPS0A;RPS19A	Downregulated
nucleosome organization (GO:0034728)	8.58e-07	1.19e-05	0.109281	0.837996	-1.23492	17.2497	TAF14;CYC8;SWR1;RTT102;NHP10;FPR3;HHT1;LYS20;NHP6A;FPR4;DPB4;LDB7	Downregulated
NLS-bearing protein import into nucleus (GO:0006607)	2.88e-05	0.000260436	0.0528733	0.636346	-1.63243	17.0691	NUP60;YRB1;NSP1;NUP100;NUP1;NUP2	Downregulated
regulation of transcription, DNA-templated (GO:0006355)	2.86e-06	3.21e-05	0.713042	0.999999	-1.3332	17.0183	HHO1;NUP100;REB1;TAF13;TFA1;HMO1;SPN1;CTR9;SUS1;GIM5;NHP6A;DOT6;SRB7;ABF2;HPC2;NHP10;CRZ1;SPT4;BUD14;BUD27	Downregulated
regulation of gene expression (GO:0010468)	3.38e-06	3.68e-05	0.189037	0.992588	-1.3443	16.9334	ABF2;HHO1;SKY1;SPN1;CTR9;NHP10;CRZ1;STE20;GIM5;SPT4;NHP6A;BUD14	Downregulated
negative regulation of cellular process (GO:0048523)	4.35e-05	0.000370503	0.0268353	0.428945	-1.68309	16.9043	SSA1;TSA1;ESC1;DIG1	Downregulated
positive regulation of cell cycle process (GO:0090068)	1.48e-05	0.000143717	0.0591591	0.695629	-1.5029	16.7186	IGO1;CPR1;DAD3;IGO2;DAD2;SPC19;EDE1	Downregulated
membrane fusion (GO:0061025)	3.33e-06	3.67e-05	0.0978757	0.827495	-1.3088	16.5059	TRX1;YHR138C;USO1;CMD1;VAM3;ATG8;MSO1;YKT6;PBI2;TRX2	Downregulated
regulation of actin filament polymerization (GO:0030833)	8.46e-05	0.000686614	0.0367793	0.537503	-1.73099	16.2332	BZZ1;AIM21;TDA2;BUD14	Downregulated
protein complex assembly (GO:0006461)	2.97e-05	0.000264102	0.0338812	0.50381	-1.54987	16.1569	ATP20;SEC16;TIM11;ATP19;ATP18	Downregulated
SRP-dependent cotranslational protein targeting to membrane, translocation (GO:0006616)	2.03e-05	0.000190213	0.0441968	0.602844	-1.4862	16.0607	SEC65;SSA4;SSA1;SRP21;SRP14;SBH1	Downregulated
respiratory chain complex III assembly (GO:0017062)	0.000148106	0.00106699	0.0485626	0.620995	-1.79221	15.803	QCR7;MZM1;CBP6;CBP4	Downregulated
vesicle fusion (GO:0006906)	3.5e-05	0.000308833	0.135212	0.91604	-1.53094	15.7069	BOS1;SSO1;SSO2;TLG1;USO1;VAM3;USE1;YKT6	Downregulated
protein import into nucleus (GO:0006606)	4.27e-06	4.55e-05	0.153138	0.954897	-1.21003	14.9598	NUP60;YRB1;NSP1;MLP1;NUP100;PBS2;SSA1;BLM10;CMD1;NUP1;NUP2	Downregulated
positive regulation of DNA-templated transcription, elongation (GO:0032786)	7.27e-06	7.37e-05	0.137646	0.921232	-1.26383	14.9528	PFD1;SUB1;YKE2;CTR9;LEO1;GIM3;TFG2;GIM5;SPT4;DST1	Downregulated
protein oligomerization (GO:0051259)	7.09e-05	0.000580168	0.0528558	0.636346	-1.54471	14.7587	ATP20;CLC1;TIM11;ATP19;ATP18	Downregulated
transcription elongation from RNA polymerase II promoter (GO:0006368)	3e-06	3.33e-05	0.132308	0.908395	-1.15895	14.7392	ELF1;TAF14;RTT102;HPC2;CTR9;SUS1;LEO1;TFG2;TFG1;DST1;LDB7	Downregulated
ribosomal small subunit export from nucleus (GO:0000056)	0.000103353	0.00078903	0.0642477	0.736329	-1.60304	14.7116	LTV1;YRB2;NSP1;SLX9;YAR1	Downregulated
DNA-templated transcription, termination (GO:0006353)	4.25e-05	0.000368631	0.0998999	0.830875	-1.46107	14.7064	REB1;SUB1;CTR9;LEO1;ESS1;RPA12;RPB11	Downregulated
mitochondrial respiratory chain complex III assembly (GO:0034551)	0.000148106	0.00106699	0.0485626	0.620995	-1.66529	14.6839	QCR7;MZM1;CBP6;CBP4	Downregulated
poly(A)+ mRNA export from nucleus (GO:0016973)	5.07e-06	5.29e-05	0.081144	0.798176	-1.20137	14.6481	NUP60;THO1;NSP1;YRA2;MLP1;SPN1;SUS1;NUP1;NUP2	Downregulated
mitochondrial transmembrane transport (GO:1990542)	7.09e-05	0.000580168	0.0528558	0.636346	-1.49266	14.2614	TIM10;TIM9;TIM8;TIM13;MGR2	Downregulated
ribose phosphate metabolic process (GO:0019693)	0.000148106	0.00106699	0.0485626	0.620995	-1.61665	14.255	NQM1;YSA1;TKL2;RPE1	Downregulated
regulation of transcription initiation from RNA polymerase II promoter (GO:0060260)	0.0007534	0.00423477	0.113383	0.837996	-1.97849	14.2272	NCB2;SUB1;CTR9;DCP2	Downregulated
mitochondrial respiratory chain complex III biogenesis (GO:0097033)	0.000148106	0.00106699	0.0485626	0.620995	-1.60886	14.1862	QCR7;MZM1;CBP6;CBP4	Downregulated
vesicle organization (GO:0016050)	2.4e-05	0.000220733	0.224051	0.992588	-1.33006	14.1512	ATG27;BOS1;SSO1;VPS51;SSO2;TLG1;VAM3;SAR1;UBC1;YKT6	Downregulated
SRP-dependent cotranslational protein targeting to membrane (GO:0006614)	5.43e-05	0.000451371	0.0731211	0.763295	-1.41844	13.9312	SEC65;SSA4;SSA1;SRP21;SRP14;SBH1	Downregulated
positive regulation of transcription elongation from RNA polymerase II promoter (GO:0032968)	2.55e-05	0.000233133	0.167708	0.9832	-1.30101	13.7594	PFD1;SUB1;YKE2;LEO1;GIM3;TFG2;GIM5;SPT4;DST1	Downregulated
organelle inheritance (GO:0048308)	6e-06	6.14e-05	0.175535	0.9832	-1.11807	13.4434	RTN2;TRX1;ABF2;ARC18;PEX19;SHE3;TPM2;TPM1;STE20;ARC15;TRX2	Downregulated
establishment of protein localization to mitochondrial membrane (GO:0090151)	9.52e-05	0.000749443	0.0972115	0.827495	-1.44353	13.3659	TIM10;TIM9;TOM22;TIM8;TIM13;MGR2	Downregulated
regulation of nucleic acid-templated transcription (GO:1903506)	2.13e-05	0.000197854	0.15508	0.954897	-1.22235	13.1501	ABF2;HHO1;CTR9;NHP10;CRZ1;GIM5;SPT4;NHP6A;BUD14	Downregulated
intracellular protein transmembrane transport (GO:0065002)	9.52e-05	0.000749443	0.0972115	0.827495	-1.41513	13.1029	SEC65;SSA4;SSA1;SRP21;SRP14;SBH1	Downregulated
telomere tethering at nuclear periphery (GO:0034398)	0.000146118	0.00106699	0.0769032	0.778015	-1.47931	13.0639	NUP60;MLP1;NUP100;MPS3;ESC1	Downregulated
transcription-dependent tethering of RNA polymerase II gene DNA at nuclear periphery (GO:0000972)	9.52e-05	0.000749443	0.0972115	0.827495	-1.40927	13.0487	NUP60;LRP1;NUP100;SUS1;NUP1;NUP2	Downregulated
regulation of protein localization (GO:0032880)	4.25e-05	0.000368631	0.0998999	0.830875	-1.27922	12.8761	SUS1;RAS2;SPA2;EDE1;BUD14;YAR1;MAK3	Downregulated
chaperone-mediated protein complex assembly (GO:0051131)	0.000240177	0.001638	0.062176	0.722796	-1.53983	12.8332	YKE2;IRC25;HSP10;SBA1	Downregulated
nucleolus organization (GO:0007000)	0.00125208	0.00646909	0.0917268	0.823128	-1.91317	12.7856	NET1;LRS4;CSM1	Downregulated
respiratory chain complex II assembly (GO:0034552)	0.000734101	0.00419545	0.0698181	0.736329	-1.76515	12.7389	SDH7;SDH8;SDH5	Downregulated
protein import into mitochondrial matrix (GO:0030150)	0.000123336	0.000927737	0.110656	0.837996	-1.39748	12.5781	MGE1;ZIM17;PAM18;TOM22;PAM16;MGR2	Downregulated
mitochondrial respiratory chain complex II assembly (GO:0034553)	0.000734101	0.00419545	0.0698181	0.736329	-1.69667	12.2446	SDH7;SDH8;SDH5	Downregulated
telomere localization (GO:0034397)	0.000146118	0.00106699	0.0769032	0.778015	-1.38569	12.2372	NUP60;MLP1;NUP100;MPS3;ESC1	Downregulated
telomere maintenance via recombination (GO:0000722)	0.000103349	0.00078903	0.152609	0.954897	-1.31822	12.0978	RAD52;RFA3;KAE1;PCC1;NHP10;IES5;IES4	Downregulated
mRNA export from nucleus in response to heat stress (GO:0031990)	0.000367238	0.00237775	0.0775733	0.778015	-1.52566	12.0672	NUP60;NUP100;RPB4;NUP2	Downregulated
vesicle docking (GO:0048278)	0.000201204	0.00140021	0.0907968	0.823128	-1.41646	12.0558	SSO1;SSO2;TLG1;USO1;VAM3	Downregulated
positive regulation of gene expression, epigenetic (GO:0045815)	0.00125208	0.00646909	0.0917268	0.823128	-1.7899	11.9618	ELF1;HHO1;TBF1	Downregulated
snRNA modification (GO:0040031)	0.00125208	0.00646909	0.0917268	0.823128	-1.78751	11.9458	GAR1;NHP2;NOP10	Downregulated
nuclear-transcribed mRNA catabolic process (GO:0000956)	1.43e-05	0.000140765	0.391592	0.999999	-1.06689	11.9006	POP6;MRT4;LRP1;POP4;EDC1;LSM4;UPF3;CDC33;LSM7;RPB4;IRC25;EAP1;DCP2	Downregulated
positive regulation of intracellular protein transport (GO:0090316)	0.000734101	0.00419545	0.0698181	0.736329	-1.6476	11.8905	SKY1;SEC16;SAR1	Downregulated
cytoplasmic mRNA processing body assembly (GO:0033962)	0.00125208	0.00646909	0.0917268	0.823128	-1.77685	11.8746	SCD6;LSM4;LSM3	Downregulated
negative regulation of ATPase activity (GO:0032780)	0.000734101	0.00419545	0.0698181	0.736329	-1.64221	11.8516	YRA1;STF1;INH1	Downregulated
telomere maintenance (GO:0000723)	9.82e-05	0.000766932	0.372822	0.999999	-1.28112	11.8227	RAD52;RFA3;KAE1;DEF1;STM1;PCC1;NHP10;IES5;TBF1;IES4	Downregulated
mitochondrial respiratory chain complex IV biogenesis (GO:0097034)	0.000590736	0.00356606	0.157749	0.954897	-1.58187	11.7598	COX17;COX12;COX14;PET191;COA6	Downregulated
mitochondrial respiratory chain complex II biogenesis (GO:0097032)	0.000734101	0.00419545	0.0698181	0.736329	-1.62218	11.7071	SDH7;SDH8;SDH5	Downregulated
regulation of translation in response to stress (GO:0043555)	0.000734101	0.00419545	0.0698181	0.736329	-1.6214	11.7014	STM1;SBP1;EDC1	Downregulated
transcription initiation from RNA polymerase III promoter (GO:0006384)	0.000367238	0.00237775	0.0775733	0.778015	-1.47766	11.6876	RPC17;SUB1;RPC31;NHP6A	Downregulated
negative regulation of gene silencing (GO:0060969)	0.00195259	0.00903846	0.116061	0.837996	-1.8667	11.6456	HHO1;ESC1;TBF1	Downregulated
glyceraldehyde-3-phosphate metabolic process (GO:0019682)	0.00125208	0.00646909	0.0917268	0.823128	-1.73461	11.5923	NQM1;TKL2;RPE1	Downregulated
positive regulation of actin nucleation (GO:0051127)	0.00195259	0.00903846	0.116061	0.837996	-1.85707	11.5855	PAN1;ABP1;CRN1	Downregulated
ubiquitin-dependent protein catabolic process (GO:0006511)	8.74e-05	0.000703916	0.692254	0.999999	-1.21152	11.3219	YRB1;SNF7;CDC31;SEM1;DEF1;MDY2;DID4;SSA1;UBC4;VPS24;RPN13;UBC1;CUE5;SKP1	Downregulated
positive regulation of Arp2/3 complex-mediated actin nucleation (GO:2000601)	0.00195259	0.00903846	0.116061	0.837996	-1.76598	11.0172	PAN1;ABP1;CRN1	Downregulated
cellular protein localization (GO:0034613)	0.000276409	0.00186031	0.758035	0.999999	-1.3445	11.0164	ATG27;ARF2;SSO1;SSO2;TLG1;USO1;RAS2;SAR1;EMP70;SML1;VAM3;ATG8;SLO1	Downregulated
organelle membrane fusion (GO:0090174)	0.000248566	0.001684	0.156189	0.954897	-1.32476	10.9953	BOS1;SSO1;SSO2;TLG1;VAM3;YKT6	Downregulated
respiratory chain complex IV assembly (GO:0008535)	0.000743166	0.00422366	0.176983	0.9832	-1.52128	10.9602	COX17;COX12;COX14;PET191;COA6	Downregulated
snRNA pseudouridine synthesis (GO:0031120)	0.00125208	0.00646909	0.0917268	0.823128	-1.63203	10.9068	GAR1;NHP2;NOP10	Downregulated
negative regulation of translation (GO:0017148)	0.000103349	0.00078903	0.152609	0.954897	-1.18621	10.8863	SCD6;RPL16A;SBP1;CAF20;COX14;EAP1;SKP1	Downregulated
endonucleolytic cleavage to generate mature 3'-end of SSU-rRNA from (SSU-rRNA, 5.8S rRNA, LSU-rRNA) (GO:0000461)	0.000734101	0.00419545	0.0698181	0.736329	-1.48581	10.7229	RPS21B;RPS0B;RPS0A	Downregulated
posttranscriptional tethering of RNA polymerase II gene DNA at nuclear periphery (GO:0000973)	0.000357233	0.00234262	0.122122	0.849872	-1.34169	10.6492	NUP60;LRP1;NUP100;SUS1;NUP2	Downregulated
regulation of protein dephosphorylation (GO:0035304)	0.000536012	0.00328347	0.094677	0.827495	-1.41217	10.6355	IGO1;IGO2;GLC8;ESS1	Downregulated
positive regulation of protein kinase activity (GO:0045860)	0.000307294	0.00205465	0.172948	0.9832	-1.30743	10.5741	SKG3;PBS2;RPP1B;STE20;RPP1A;RPP2B	Downregulated
assembly of actomyosin apparatus involved in mitotic cytokinesis (GO:1902407)	0.00125208	0.00646909	0.0917268	0.823128	-1.57954	10.556	TPM2;TPM1;PFY1	Downregulated
actin polymerization or depolymerization (GO:0008154)	0.00125208	0.00646909	0.0917268	0.823128	-1.57625	10.534	TPM2;TPM1;COF1	Downregulated
positive regulation of translation (GO:0045727)	0.000105947	0.000802846	0.220008	0.992588	-1.14894	10.5157	GIS2;HYP2;RPS9A;IMP3;RPB4;CBP6;EDC1;UPF3	Downregulated
transcription elongation from RNA polymerase I promoter (GO:0006362)	0.00125208	0.00646909	0.0917268	0.823128	-1.5713	10.5009	CTR9;DST1;RPA34	Downregulated
mitotic actomyosin contractile ring assembly (GO:1903475)	0.00195259	0.00903846	0.116061	0.837996	-1.6824	10.4958	TPM2;TPM1;PFY1	Downregulated
chromatin assembly or disassembly (GO:0006333)	0.000157625	0.00111207	0.124994	0.86398	-1.17799	10.3137	ULS1;HHF1;HHT1;HTA2;NHP6A;HTB2	Downregulated
rRNA pseudouridine synthesis (GO:0031118)	0.00195259	0.00903846	0.116061	0.837996	-1.64968	10.2917	GAR1;NHP2;NOP10	Downregulated
vacuole fusion (GO:0097576)	0.000153314	0.00108917	0.18297	0.992588	-1.1649	10.2313	TRX1;YHR138C;CMD1;VAM3;YKT6;PBI2;TRX2	Downregulated
Golgi vesicle transport (GO:0048193)	0.00021722	0.00149138	0.794637	0.999999	-1.19885	10.1118	BUG1;USO1;GLO3;SAR1;USE1;SNX3;TRX1;BOS1;SMY2;ATG8;COY1;NEO1;YKT6;TRX2	Downregulated
regulation of nucleotide-excision repair (GO:2000819)	0.00195259	0.00903846	0.116061	0.837996	-1.60231	9.99619	CTR9;LEO1;SPT4	Downregulated
cellular copper ion homeostasis (GO:0006878)	0.00176737	0.00860963	0.177803	0.9832	-1.57427	9.97814	EMP70;HAA1;COA6;SOD1	Downregulated
mitochondrial respiratory chain complex IV assembly (GO:0033617)	0.000590736	0.00356606	0.157749	0.954897	-1.33614	9.93306	COX17;COX12;COX14;PET191;COA6	Downregulated
multivesicular body sorting pathway (GO:0071985)	0.00195259	0.00903846	0.116061	0.837996	-1.58977	9.91795	DID2;DID4;VPS24	Downregulated
vacuole fusion, non-autophagic (GO:0042144)	0.000153314	0.00108917	0.18297	0.992588	-1.12327	9.8657	TRX1;YHR138C;CMD1;VAM3;YKT6;PBI2;TRX2	Downregulated
maturation of 5.8S rRNA (GO:0000460)	0.000463006	0.0029238	0.139435	0.921232	-1.27933	9.8224	NSA2;MAK16;SPB1;DBP10;RRP15	Downregulated
regulation of translational initiation (GO:0006446)	0.000357233	0.00234262	0.122122	0.849872	-1.23601	9.81038	HYP2;FUN12;STM1;SCD6;RPB4	Downregulated
RNA transport (GO:0050658)	0.00136206	0.00689795	0.155092	0.954897	-1.4859	9.80512	YRB1;NSP1;NUP100;NUP1	Downregulated
regulation of transcription-coupled nucleotide-excision repair (GO:0090262)	0.00195259	0.00903846	0.116061	0.837996	-1.5701	9.79524	CTR9;LEO1;SPT4	Downregulated
protein ubiquitination (GO:0016567)	0.000471115	0.00295675	0.587713	0.999999	-1.27128	9.73855	RFA3;RPL40B;HEL2;DEF1;SSA1;UBC4;RPS31;MMS2;UBC1;UPF3	Downregulated
vacuole inheritance (GO:0000011)	0.000357233	0.00234262	0.122122	0.849872	-1.21306	9.62823	TRX1;TPM2;TPM1;STE20;TRX2	Downregulated
regulation of transcription from RNA polymerase II promoter by pheromones (GO:0046019)	0.00136206	0.00689795	0.155092	0.954897	-1.45465	9.59888	PCC1;SUB1;CRZ1;DIG1	Downregulated
histone H3-K4 methylation (GO:0051568)	0.0010264	0.00564522	0.133568	0.910935	-1.37667	9.47384	SUS1;LEO1;SDC1;ESS1	Downregulated
protein import (GO:0017038)	0.000460818	0.0029238	0.389966	0.999999	-1.22288	9.39475	YRB1;NSP1;MLP1;NUP100;PBS2;CMD1;NUP1;NUP2	Downregulated
spliceosomal snRNP assembly (GO:0000387)	0.00176737	0.00860963	0.177803	0.9832	-1.48062	9.38454	MRN1;LSM4;SMD2;SMD3	Downregulated
establishment of protein localization to organelle (GO:0072594)	0.000592601	0.00356606	0.425511	0.999999	-1.25069	9.2939	YRB1;NSP1;MLP1;NUP100;PBS2;CMD1;NUP1;NUP2	Downregulated
modification-dependent protein catabolic process (GO:0019941)	0.000160252	0.00112286	0.435728	0.999999	-1.05909	9.25512	RPL40B;SEM1;YRB1;DEF1;UBC4;RPS31;RPN13;UBC1;CUE5;SKP1	Downregulated
regulation of telomere maintenance via telomerase (GO:0032210)	0.00532846	0.0210464	0.200254	0.992588	-1.73961	9.10634	PXR1;SBA1;TBF1	Downregulated
chaperone mediated protein folding requiring cofactor (GO:0051085)	0.00176737	0.00860963	0.177803	0.9832	-1.43231	9.07836	SIS1;SSA4;SSA1;HSP10	Downregulated
regulation of microtubule polymerization (GO:0031113)	0.00136206	0.00689795	0.155092	0.954897	-1.36147	8.984	BIK1;DAD3;DAD2;SPC19	Downregulated
chronological cell aging (GO:0001300)	0.00113362	0.00613596	0.217845	0.992588	-1.3223	8.96826	FIS1;NQM1;MDH1;SCP1;ACB1	Downregulated
DNA packaging (GO:0006323)	0.00224927	0.0102723	0.201544	0.992588	-1.45925	8.89726	HHO1;LRS4;HMO1;CSM1	Downregulated
purine ribonucleotide biosynthetic process (GO:0009152)	0.00136206	0.00689795	0.155092	0.954897	-1.34061	8.84639	CAB3;IMD2;GUK1;ADK1	Downregulated
protein catabolic process in the vacuole (GO:0007039)	0.0007534	0.00423477	0.113383	0.837996	-1.2058	8.67077	PRB1;APE1;REG1;PAI3	Downregulated
vacuole organization (GO:0007033)	0.000658152	0.00393737	0.246381	0.997297	-1.18236	8.66204	TRX1;TPM2;TPM1;STE20;NEO1;TRX2	Downregulated
positive regulation of transcription by pheromones (GO:0009371)	0.00195259	0.00903846	0.116061	0.837996	-1.38558	8.64406	PCC1;SUB1;CRZ1	Downregulated
regulation of cellular macromolecule biosynthetic process (GO:2000112)	0.000212278	0.0014673	0.381078	0.999999	-1.01761	8.60652	ABF2;HHO1;CTR9;NHP10;CRZ1;GIM5;SPT4;NHP6A;BUD14	Downregulated
positive regulation of kinase activity (GO:0033674)	0.00285483	0.0126428	0.142488	0.928444	-1.46123	8.56097	RPP1B;RPP1A;RPP2B	Downregulated
macroautophagy (GO:0016236)	0.00048805	0.00304436	0.497039	0.999999	-1.11621	8.51122	ATG27;ARF2;SEC16;RAS2;RPL14A;RPL15B;VAM3;RPL13B;EGD1	Downregulated
rRNA 3'-end processing (GO:0031125)	0.00113362	0.00613596	0.217845	0.992588	-1.25435	8.5074	LRP1;RPS21B;MPP6;RPS0B;RPS0A	Downregulated
mitotic recombination (GO:0006312)	0.00066959	0.0039825	0.342343	0.999999	-1.15326	8.42899	RAD52;RFA3;KAE1;PCC1;NHP10;IES5;IES4	Downregulated
posttranslational protein targeting to endoplasmic reticulum membrane (GO:0006620)	0.000463006	0.0029238	0.139435	0.921232	-1.09473	8.40506	EGD2;MDY2;SGT2;SBH1;EGD1	Downregulated
intralumenal vesicle formation (GO:0070676)	0.00195259	0.00903846	0.116061	0.837996	-1.32756	8.28208	DID4;SNF7;VPS24	Downregulated
copper ion homeostasis (GO:0055070)	0.00224927	0.0102723	0.201544	0.992588	-1.35585	8.26683	EMP70;HAA1;COA6;SOD1	Downregulated
endocytosis (GO:0006897)	0.000513726	0.0031851	0.687363	0.999999	-1.08905	8.24823	BZZ1;PAN1;SDS24;TLG1;SCD5;CLC1;CMD1;COF1;YCK1;EDE1;NEO1	Downregulated
'de novo' posttranslational protein folding (GO:0051084)	0.00176737	0.00860963	0.177803	0.9832	-1.29304	8.19561	SIS1;SSA4;SSA1;HSP10	Downregulated
nuclear import (GO:0051170)	0.000460818	0.0029238	0.389966	0.999999	-1.06092	8.15049	YRB1;NSP1;MLP1;NUP100;PBS2;CMD1;NUP1;NUP2	Downregulated
protein localization to nuclear envelope (GO:0090435)	0.0039754	0.0168051	0.170666	0.9832	-1.47427	8.14922	MLP1;NUP100;NUP2	Downregulated
positive regulation of transcription initiation from RNA polymerase II promoter (GO:0060261)	0.00176737	0.00860963	0.177803	0.9832	-1.27765	8.09809	SUB1;DST1;ESS1;DCP2	Downregulated
cleavage in ITS2 between 5.8S rRNA and LSU-rRNA of tricistronic rRNA transcript (SSU-rRNA, 5.8S rRNA, LSU-rRNA) (GO:0000448)	0.0039754	0.0168051	0.170666	0.9832	-1.46463	8.09594	RPL17B;RPL37A;RPL37B	Downregulated
positive regulation of transcription from RNA polymerase II promoter by pheromones (GO:0007329)	0.00195259	0.00903846	0.116061	0.837996	-1.29649	8.08826	PCC1;SUB1;CRZ1	Downregulated
actin nucleation (GO:0045010)	0.0039754	0.0168051	0.170666	0.9832	-1.4547	8.04103	BZZ1;ARC18;ARC15	Downregulated
mRNA catabolic process (GO:0006402)	0.00224927	0.0102723	0.201544	0.992588	-1.31189	7.99882	MRT4;LSM7;EAP1;LSM4	Downregulated
protein targeting to ER (GO:0045047)	0.00113362	0.00613596	0.217845	0.992588	-1.17701	7.98286	EGD2;MDY2;SGT2;SRP14;EGD1	Downregulated
RNA metabolic process (GO:0016070)	0.000523362	0.0032253	0.407743	0.999999	-1.0558	7.9768	KAE1;SGN1;LSM12;LSM7;PCC1;RTC3;BFR1;DPB4	Downregulated
regulation of mitotic cell cycle phase transition (GO:1901990)	0.00165824	0.00831557	0.261262	0.997297	-1.2391	7.93271	NET1;IGO1;IGO2;STE20;SKP1	Downregulated
regulation of RNA metabolic process (GO:0051252)	0.00285483	0.0126428	0.142488	0.928444	-1.34625	7.88734	NSR1;HRP1;SPT4	Downregulated
positive regulation of transcription elongation from RNA polymerase I promoter (GO:2001209)	0.0039754	0.0168051	0.170666	0.9832	-1.425	7.87686	CTR9;LEO1;SPT4	Downregulated
cellular protein catabolic process (GO:0044257)	0.000781442	0.00436839	0.266017	0.997297	-1.09524	7.83578	HEL2;CPS1;PRB1;APE1;REG1;PAI3	Downregulated
nuclear retention of pre-mRNA at the site of transcription (GO:0071033)	0.00692594	0.0263392	0.230925	0.992588	-1.54666	7.69073	LRP1;MLP1;SUS1	Downregulated
vacuolar acidification (GO:0007035)	0.00234195	0.0106009	0.30645	0.999999	-1.24244	7.52517	VMA4;VMA22;VMA7;VMA10;SKP1	Downregulated
ATP export (GO:1904669)	0.00281455	0.0125733	0.226154	0.992588	-1.26683	7.44002	LTV1;DID4;SNF7;VPS24	Downregulated
regulation of ATPase activity (GO:0043462)	0.00532846	0.0210464	0.200254	0.992588	-1.40778	7.36929	YRA1;STF1;INH1	Downregulated
intracellular pH reduction (GO:0051452)	0.00234195	0.0106009	0.30645	0.999999	-1.21654	7.36831	VMA4;VMA22;VMA7;VMA10;SKP1	Downregulated
regulation of transcription elongation from RNA polymerase I promoter (GO:2001207)	0.0039754	0.0168051	0.170666	0.9832	-1.27257	7.03429	CTR9;LEO1;SPT4	Downregulated
protein stabilization (GO:0050821)	0.00532846	0.0210464	0.200254	0.992588	-1.33045	6.96449	ZIM17;PEX19;SOD1	Downregulated
regulation of chromatin silencing (GO:0031935)	0.00422154	0.0176271	0.277343	0.999999	-1.27195	6.95447	YRB2;HHO1;CTR9;TBF1	Downregulated
protein localization to nucleus (GO:0034504)	0.000845782	0.00470236	0.478413	0.999999	-0.982768	6.95333	YRB1;NSP1;MLP1;NUP100;PBS2;CMD1;NUP1;NUP2	Downregulated
protein targeting to membrane (GO:0006612)	0.00168568	0.00841197	0.368505	0.999999	-1.05185	6.71669	EGD2;PEX19;MDY2;SGT2;AST2;EGD1	Downregulated
modification-dependent macromolecule catabolic process (GO:0043632)	0.0159419	0.0494198	0.222514	0.992588	-1.60594	6.64667	RPL40B;RPS31	Downregulated
cortical actin cytoskeleton organization (GO:0030866)	0.00507585	0.0203631	0.303611	0.999999	-1.2569	6.64052	PAN1;SCD5;ABP1;ARC15	Downregulated
protein acetylation (GO:0006473)	0.00532846	0.0210464	0.200254	0.992588	-1.26038	6.59772	NAT5;HPA3;MAK3	Downregulated
regulation of histone H2B conserved C-terminal lysine ubiquitination (GO:2001173)	0.0159419	0.0494198	0.222514	0.992588	-1.58521	6.56087	CTR9;LEO1	Downregulated
ER to Golgi vesicle-mediated transport (GO:0006888)	0.000987492	0.00546056	0.69435	0.999999	-0.944773	6.53815	TRX1;BUG1;BOS1;SMY2;USO1;GLO3;ATG8;SAR1;YKT6;TRX2	Downregulated
chromosome condensation (GO:0030261)	0.00346983	0.0150408	0.251473	0.997297	-1.14012	6.45724	HHO1;LRS4;HMO1;CSM1	Downregulated
nucleosome assembly (GO:0006334)	0.00346983	0.0150408	0.251473	0.997297	-1.13874	6.44942	HPC2;FPR3;HHT1;FPR4	Downregulated
positive regulation of transcription from RNA polymerase II promoter involved in cellular response to chemical stimulus (GO:1901522)	0.00275144	0.0123453	0.329468	0.999999	-1.09302	6.44407	YAP1;PCC1;SUB1;CRZ1;SOD1	Downregulated
response to unfolded protein (GO:0006986)	0.00422154	0.0176271	0.277343	0.999999	-1.17446	6.42142	ZIM17;SSA4;SSA1;REG1	Downregulated
positive regulation of attachment of spindle microtubules to kinetochore (GO:0051987)	0.00692594	0.0263392	0.230925	0.992588	-1.27347	6.33229	DAD3;DAD2;SPC19	Downregulated
regulation of attachment of spindle microtubules to kinetochore (GO:0051988)	0.00692594	0.0263392	0.230925	0.992588	-1.27131	6.32157	DAD3;DAD2;SPC19	Downregulated
nucleosome mobilization (GO:0042766)	0.0087777	0.0321849	0.262367	0.997297	-1.31857	6.24414	TAF14;NHP10;DPB4	Downregulated
positive regulation of DNA-templated transcription, initiation (GO:2000144)	0.0159419	0.0494198	0.222514	0.992588	-1.50706	6.23742	SUB1;DCP2	Downregulated
regulation of mRNA metabolic process (GO:1903311)	0.0159419	0.0494198	0.222514	0.992588	-1.49949	6.20608	SKY1;SPN1	Downregulated
protein localization to nucleolar rDNA repeats (GO:0034503)	0.0159419	0.0494198	0.222514	0.992588	-1.4934	6.1809	LRS4;CSM1	Downregulated
cytoskeleton organization (GO:0007010)	0.00692594	0.0263392	0.230925	0.992588	-1.23655	6.14874	PFD1;CMD1;BUD14	Downregulated
regulation of proteolysis (GO:0030162)	0.00692594	0.0263392	0.230925	0.992588	-1.23237	6.12796	NUP60;TFS1;PBI2	Downregulated
protein export from nucleus (GO:0006611)	0.0087777	0.0321849	0.262367	0.997297	-1.29396	6.12762	YRB2;NUP60;NUP2	Downregulated
tRNA threonylcarbamoyladenosine metabolic process (GO:0070525)	0.0159419	0.0494198	0.222514	0.992588	-1.47781	6.11639	KAE1;PCC1	Downregulated
'de novo' NAD biosynthetic process from tryptophan (GO:0034354)	0.0159419	0.0494198	0.222514	0.992588	-1.4732	6.09731	BNA1;BNA5	Downregulated
mRNA metabolic process (GO:0016071)	0.00507585	0.0203631	0.303611	0.999999	-1.15336	6.09349	SGN1;SPT4;BFR1;EAP1	Downregulated
RNA phosphodiester bond hydrolysis (GO:0090501)	0.00692594	0.0263392	0.230925	0.992588	-1.22221	6.07743	NHP2;RRP36;NOP10	Downregulated
regulation of protein kinase activity (GO:0045859)	0.00692594	0.0263392	0.230925	0.992588	-1.21934	6.06314	RPP1B;RPP1A;RPP2B	Downregulated
nucleoside phosphate metabolic process (GO:0006753)	0.0159419	0.0494198	0.222514	0.992588	-1.44824	5.99397	HNT1;ADK1	Downregulated
superoxide metabolic process (GO:0006801)	0.0159419	0.0494198	0.222514	0.992588	-1.44474	5.97951	CCS1;SOD1	Downregulated
negative regulation of protein dephosphorylation (GO:0035308)	0.0159419	0.0494198	0.222514	0.992588	-1.43698	5.94738	IGO1;IGO2	Downregulated
mitotic spindle elongation (GO:0000022)	0.0108917	0.0390954	0.294291	0.999999	-1.30834	5.91336	BIK1;UBC9;YHR127W	Downregulated
translation reinitiation (GO:0002188)	0.0159419	0.0494198	0.222514	0.992588	-1.4268	5.90523	TMA20;TMA22	Downregulated
cellular response to fatty acid (GO:0071398)	0.0159419	0.0494198	0.222514	0.992588	-1.41254	5.84621	RTG1;CST6	Downregulated
biotin metabolic process (GO:0006768)	0.0218178	0.0613176	0.266141	0.997297	-1.52811	5.84508	BIO4;BIO2	Downregulated
alditol metabolic process (GO:0019400)	0.0218178	0.0613176	0.266141	0.997297	-1.52555	5.83526	GPP2;TCO89	Downregulated
actin filament bundle organization (GO:0061572)	0.00507585	0.0203631	0.303611	0.999999	-1.09496	5.78494	LSB1;TPM2;TPM1;ABP140	Downregulated
actin filament bundle assembly (GO:0051017)	0.00507585	0.0203631	0.303611	0.999999	-1.09439	5.78196	LSB1;TPM2;TPM1;ABP140	Downregulated
guanosine-containing compound biosynthetic process (GO:1901070)	0.0159419	0.0494198	0.222514	0.992588	-1.39391	5.76912	IMD2;GUK1	Downregulated
assembly of actomyosin apparatus involved in cytokinesis (GO:0000912)	0.0218178	0.0613176	0.266141	0.997297	-1.49735	5.72739	NOP15;MLC1	Downregulated
snoRNA transcription (GO:0009302)	0.0159419	0.0494198	0.222514	0.992588	-1.37982	5.71081	CTR9;TBF1	Downregulated
vesicle budding from membrane (GO:0006900)	0.0087777	0.0321849	0.262367	0.997297	-1.20564	5.70935	DID4;SNF7;VPS24	Downregulated
tRNA metabolic process (GO:0006399)	0.00507585	0.0203631	0.303611	0.999999	-1.07376	5.67296	POP6;POP4;DTD1;LHP1	Downregulated
rRNA modification (GO:0000154)	0.0108917	0.0390954	0.294291	0.999999	-1.24787	5.64005	NHP2;SPB1;NOP10	Downregulated
actomyosin contractile ring organization (GO:0044837)	0.0218178	0.0613176	0.266141	0.997297	-1.47072	5.62555	NOP15;MLC1	Downregulated
box C/D snoRNA processing (GO:0034963)	0.0087777	0.0321849	0.262367	0.997297	-1.18724	5.62222	POP6;PXR1;POP4	Downregulated
pyrimidine-containing compound salvage (GO:0008655)	0.0159419	0.0494198	0.222514	0.992588	-1.35674	5.61528	CDD1;FCY1	Downregulated
positive regulation of mitotic cell cycle (GO:0045931)	0.0218178	0.0613176	0.266141	0.997297	-1.458	5.57691	IGO1;IGO2	Downregulated
negative regulation of gene expression (GO:0010629)	0.00491558	0.0201145	0.422269	0.999999	-1.04528	5.55604	RPL16A;SBP1;CAF20;STE20;EAP1	Downregulated
response to oleic acid (GO:0034201)	0.0159419	0.0494198	0.222514	0.992588	-1.33965	5.54456	RTG1;CST6	Downregulated
pseudouridine synthesis (GO:0001522)	0.0108917	0.0390954	0.294291	0.999999	-1.22657	5.54378	GAR1;NHP2;NOP10	Downregulated
ATP transport (GO:0015867)	0.00603866	0.0236688	0.330132	0.999999	-1.08326	5.53497	LTV1;DID4;SNF7;VPS24	Downregulated
mitochondrion inheritance (GO:0000001)	0.00321033	0.0140915	0.352644	0.999999	-0.963807	5.53358	ABF2;ARC18;TPM2;TPM1;ARC15	Downregulated
negative regulation of transcription from RNA polymerase II promoter (GO:0000122)	0.00161465	0.00813686	0.920126	0.999999	-0.857001	5.50935	NCB2;CSE2;BUR6;HHF1;ESS1;RPA12;DOT6;DIG1;MED11;SRB7;CYC8;CBF1;REG1	Downregulated
mitochondrion distribution (GO:0048311)	0.00321033	0.0140915	0.352644	0.999999	-0.953774	5.47598	ABF2;ARC18;TPM2;TPM1;ARC15	Downregulated
cellular response to oleic acid (GO:0071400)	0.0159419	0.0494198	0.222514	0.992588	-1.32024	5.4642	RTG1;CST6	Downregulated
histone deubiquitination (GO:0016578)	0.0218178	0.0613176	0.266141	0.997297	-1.42746	5.46006	SEM1;SUS1	Downregulated
negative regulation of cellular amide metabolic process (GO:0034249)	0.00711561	0.0268608	0.356766	0.999999	-1.10273	5.4535	RPL16A;SBP1;CAF20;EAP1	Downregulated
positive regulation of microtubule polymerization (GO:0031116)	0.0087777	0.0321849	0.262367	0.997297	-1.13361	5.36825	DAD3;DAD2;SPC19	Downregulated
cellular transition metal ion homeostasis (GO:0046916)	0.00259508	0.011695	0.656526	0.999999	-0.899231	5.35415	EMP70;ATX1;ISU1;ISU2;HAA1;MAM3;COA6;SOD1	Downregulated
positive regulation of chromosome segregation (GO:0051984)	0.00692594	0.0263392	0.230925	0.992588	-1.07233	5.33212	DAD3;DAD2;SPC19	Downregulated
retrograde vesicle-mediated transport, Golgi to ER (GO:0006890)	0.00491558	0.0201145	0.422269	0.999999	-0.999253	5.31138	TRX1;GLO3;NEO1;USE1;TRX2	Downregulated
positive regulation of MAP kinase activity (GO:0043406)	0.0159419	0.0494198	0.222514	0.992588	-1.2823	5.30719	PBS2;STE20	Downregulated
positive regulation of microtubule polymerization or depolymerization (GO:0031112)	0.0087777	0.0321849	0.262367	0.997297	-1.11745	5.29171	DAD3;DAD2;SPC19	Downregulated
pentose-phosphate shunt (GO:0006098)	0.0108917	0.0390954	0.294291	0.999999	-1.16898	5.28348	NQM1;TKL2;RPE1	Downregulated
positive regulation of transcription from RNA polymerase I promoter (GO:0045943)	0.00831201	0.0311472	0.383386	0.999999	-1.09364	5.23857	DHR2;CTR9;LEO1;SPT4	Downregulated
maintenance of translational fidelity (GO:1990145)	0.0159419	0.0494198	0.222514	0.992588	-1.26028	5.21605	EFB1;SUI1	Downregulated
biotin biosynthetic process (GO:0009102)	0.0218178	0.0613176	0.266141	0.997297	-1.3618	5.20892	BIO4;BIO2	Downregulated
positive regulation of transcription from RNA polymerase II promoter in response to stress (GO:0036003)	0.00322328	0.0140915	0.472327	0.999999	-0.903989	5.18651	YAP1;NCB2;BUR6;HAA1;CRZ1;SOD1	Downregulated
endosomal transport (GO:0016197)	0.0039986	0.0168336	0.724477	0.999999	-0.934997	5.16287	EMP70;DID2;BOS1;VPS51;DID4;TLG1;SNF7;VPS24	Downregulated
cellular response to misfolded protein (GO:0071218)	0.00603866	0.0236688	0.330132	0.999999	-1.00493	5.13476	TMC1;SIS1;GIM3;UBC4	Downregulated
Arp2/3 complex-mediated actin nucleation (GO:0034314)	0.0218178	0.0613176	0.266141	0.997297	-1.33756	5.11622	ARC18;ARC15	Downregulated
attachment of spindle microtubules to kinetochore involved in homologous chromosome segregation (GO:0051455)	0.0218178	0.0613176	0.266141	0.997297	-1.32939	5.08495	LRS4;CSM1	Downregulated
regulation of RNA polymerase II transcriptional preinitiation complex assembly (GO:0045898)	0.0132741	0.0463461	0.326436	0.999999	-1.17533	5.0797	NCB2;DST1;ESS1	Downregulated
ion homeostasis (GO:0050801)	0.0132741	0.0463461	0.326436	0.999999	-1.17156	5.06342	CNB1;SKY1;CRZ1	Downregulated
negative regulation of cellular protein metabolic process (GO:0032269)	0.00711561	0.0268608	0.356766	0.999999	-1.02276	5.05802	RPL16A;SBP1;CAF20;EAP1	Downregulated
positive regulation of translational initiation (GO:0045948)	0.0159419	0.0494198	0.222514	0.992588	-1.20603	4.99154	HYP2;RPB4	Downregulated
negative regulation of protein modification process (GO:0031400)	0.0218178	0.0613176	0.266141	0.997297	-1.28907	4.93073	IGO1;IGO2	Downregulated
regulation of translation (GO:0006417)	0.00462917	0.0190953	0.64972	0.999999	-0.917222	4.93042	EFB1;FUN12;RPL16A;SBP1;CAF20;EAP1;UPF3	Downregulated
regulation of histone H2B ubiquitination (GO:2001166)	0.0218178	0.0613176	0.266141	0.997297	-1.28896	4.9303	CTR9;LEO1	Downregulated
cellular bud site selection (GO:0000282)	0.0045436	0.0188182	0.532402	0.999999	-0.91341	4.92696	PAN1;AXL2;BUD20;SPA2;BUD13;STE20	Downregulated
regulation of nucleobase-containing compound metabolic process (GO:0019219)	0.0218178	0.0613176	0.266141	0.997297	-1.28183	4.90302	NSR1;HRP1	Downregulated
macromolecule biosynthetic process (GO:0009059)	0.0218178	0.0613176	0.266141	0.997297	-1.25833	4.81316	EFB1;SUI1	Downregulated
termination of RNA polymerase II transcription (GO:0006369)	0.0126661	0.0445273	0.462022	0.999999	-1.10143	4.81196	REB1;SUB1;ESS1;RPB11	Downregulated
termination of RNA polymerase I transcription (GO:0006363)	0.0218178	0.0613176	0.266141	0.997297	-1.25001	4.78133	REB1;RPA12	Downregulated
regulation of protein metabolic process (GO:0051246)	0.0159419	0.0494198	0.222514	0.992588	-1.15027	4.76075	TFS1;PBI2	Downregulated
protein modification by small protein conjugation (GO:0032446)	0.00367949	0.0158824	0.711646	0.999999	-0.844072	4.73101	RFA3;RPL40B;DEF1;UBC9;UBC4;RPS31;SKP1;UPF3	Downregulated
transfer RNA gene-mediated silencing (GO:0061587)	0.0159295	0.0494198	0.358563	0.999999	-1.1264	4.66281	HHF1;REG1;DOT6	Downregulated
histone lysine methylation (GO:0034968)	0.0159295	0.0494198	0.358563	0.999999	-1.12478	4.65614	SUS1;SDC1;HHF1	Downregulated
deadenylation-dependent decapping of nuclear-transcribed mRNA (GO:0000290)	0.0159295	0.0494198	0.358563	0.999999	-1.11969	4.63507	EAP1;EDC1;DCP2	Downregulated
response to salt stress (GO:0009651)	0.0126661	0.0445273	0.462022	0.999999	-1.05953	4.62892	BZZ1;CAB3;CTT1;TCO89	Downregulated
regulation of cell cycle (GO:0051726)	0.00757087	0.0284743	0.625364	0.999999	-0.945653	4.61805	SEM1;CDC33;SKG3;PBS2;STE20;CMK2	Downregulated
cellular response to topologically incorrect protein (GO:0035967)	0.0159295	0.0494198	0.358563	0.999999	-1.1078	4.58584	TMC1;SSA4;SSA1	Downregulated
establishment of mitochondrion localization (GO:0051654)	0.0159419	0.0494198	0.222514	0.992588	-1.10788	4.58532	AIM21;ARC18	Downregulated
gluconeogenesis (GO:0006094)	0.0159295	0.0494198	0.358563	0.999999	-1.10701	4.58254	GPM1;TDH2;TDH1	Downregulated
riboflavin biosynthetic process (GO:0009231)	0.0218178	0.0613176	0.266141	0.997297	-1.19749	4.58042	RIB3;RIB4	Downregulated
negative regulation of programmed cell death (GO:0043069)	0.0218178	0.0613176	0.266141	0.997297	-1.19666	4.57726	STM1;DRE2	Downregulated
negative regulation of cell aging (GO:0090344)	0.0159419	0.0494198	0.222514	0.992588	-1.10365	4.56778	SSA1;TSA1	Downregulated
late endosome to vacuole transport (GO:0045324)	0.00904185	0.033035	0.534237	0.999999	-0.969935	4.56441	DID2;DID4;IST1;SNF7;VPS24	Downregulated
nucleobase-containing compound biosynthetic process (GO:0034654)	0.0218178	0.0613176	0.266141	0.997297	-1.18549	4.53454	CDD1;FCY1	Downregulated
protein-DNA complex assembly (GO:0065004)	0.00963285	0.0350691	0.409873	0.999999	-0.975976	4.53104	RAD52;FPR3;HHT1;FPR4	Downregulated
dicarboxylic acid metabolic process (GO:0043648)	0.0159295	0.0494198	0.358563	0.999999	-1.09371	4.52751	BNA1;SDH7;YMR31	Downregulated
'de novo' cotranslational protein folding (GO:0051083)	0.0284395	0.0753722	0.309744	0.999999	-1.24956	4.44841	EGD2;EGD1	Downregulated
histone H3-K79 methylation (GO:0034729)	0.0218178	0.0613176	0.266141	0.997297	-1.16145	4.44257	SUS1;HHF1	Downregulated
hexose biosynthetic process (GO:0019319)	0.0159295	0.0494198	0.358563	0.999999	-1.07262	4.44022	GPM1;TDH2;TDH1	Downregulated
RNA polymerase III transcriptional preinitiation complex assembly (GO:0070898)	0.0218178	0.0613176	0.266141	0.997297	-1.15593	4.42145	SUB1;NHP6A	Downregulated
cell wall chitin metabolic process (GO:0006037)	0.0218178	0.0613176	0.266141	0.997297	-1.15518	4.41859	CRH1;CRZ1	Downregulated
riboflavin metabolic process (GO:0006771)	0.0218178	0.0613176	0.266141	0.997297	-1.15333	4.41153	RIB3;RIB4	Downregulated
protein targeting (GO:0006605)	0.00449123	0.0186769	0.820159	0.999999	-0.814878	4.40493	DID2;BOS1;OM14;TOM5;VPS51;SSA1;SRP14;AST2;STI1	Downregulated
nucleic acid metabolic process (GO:0090304)	0.0284395	0.0753722	0.309744	0.999999	-1.23564	4.39886	LSM12;RTC3	Downregulated
endosome transport via multivesicular body sorting pathway (GO:0032509)	0.0126661	0.0445273	0.462022	0.999999	-0.993495	4.3404	DID2;DID4;IST1;VPS24	Downregulated
regulation of cell aging (GO:0090342)	0.0159419	0.0494198	0.222514	0.992588	-1.0407	4.30725	SSA1;TSA1	Downregulated
carbohydrate catabolic process (GO:0016052)	0.0143868	0.0494198	0.487499	0.999999	-1.00498	4.26259	AMS1;GPM1;TDH2;TDH1	Downregulated
bipolar cellular bud site selection (GO:0007121)	0.018861	0.0574249	0.390462	0.999999	-1.06836	4.2421	PAN1;SPA2;STE20	Downregulated
negative regulation of hydrolase activity (GO:0051346)	0.0218178	0.0613176	0.266141	0.997297	-1.09517	4.18907	STF1;INH1	Downregulated
water-soluble vitamin biosynthetic process (GO:0042364)	0.0110828	0.0395102	0.436118	0.999999	-0.928436	4.18015	BIO4;BIO2;RIB3;RIB4	Downregulated
regulation of transcription from RNA polymerase II promoter in response to oxidative stress (GO:0043619)	0.0284395	0.0753722	0.309744	0.999999	-1.17334	4.17705	YAP1;SOD1	Downregulated
positive regulation of protein polymerization (GO:0032273)	0.0159295	0.0494198	0.358563	0.999999	-0.990359	4.09967	DAD3;DAD2;SPC19	Downregulated
chromatin assembly (GO:0031497)	0.0143868	0.0494198	0.487499	0.999999	-0.96542	4.09478	CYC8;FPR3;HHT1;FPR4	Downregulated
rDNA condensation (GO:0070550)	0.043693	0.106933	0.394844	0.999999	-1.30712	4.09204	LRS4;CSM1	Downregulated
organelle fission (GO:0048285)	0.018861	0.0574249	0.390462	0.999999	-1.00103	3.97474	FIS1;SAR1;EBP2	Downregulated
nucleoside triphosphate metabolic process (GO:0009141)	0.0218178	0.0613176	0.266141	0.997297	-1.03248	3.94925	YNK1;HAM1	Downregulated
endosome organization (GO:0007032)	0.018861	0.0574249	0.390462	0.999999	-0.978824	3.88658	DID4;SNF7;VPS24	Downregulated
protein localization to nuclear inner membrane (GO:0036228)	0.0357495	0.0907486	0.352785	0.999999	-1.16232	3.87194	NUP100;NUP2	Downregulated
hydrogen peroxide catabolic process (GO:0042744)	0.0218178	0.0613176	0.266141	0.997297	-1.00567	3.8467	CTT1;TSA1	Downregulated
mRNA 3'-end processing (GO:0031124)	0.0112118	0.0398253	0.576245	0.999999	-0.849622	3.81547	FIP1;RPB4;RTT103;CTR9;HRP1	Downregulated
negative regulation of chromatin organization (GO:1905268)	0.043693	0.106933	0.394844	0.999999	-1.19858	3.75224	HHO1;TBF1	Downregulated
proteasomal protein catabolic process (GO:0010498)	0.0139387	0.0485008	0.735716	0.999999	-0.877278	3.74868	CDC31;SEM1;MDY2;SSA1;BLM10;UBC1	Downregulated
spindle pole body duplication (GO:0030474)	0.018861	0.0574249	0.390462	0.999999	-0.918128	3.64558	CDC31;SPC42;MPS3	Downregulated
ubiquitin-dependent catabolism of misfolded proteins by cytoplasm-associated proteasome (GO:0071629)	0.043693	0.106933	0.394844	0.999999	-1.14903	3.5971	GIM3;UBC4	Downregulated
regulation of actin filament bundle assembly (GO:0032231)	0.0357495	0.0907486	0.352785	0.999999	-1.07948	3.59599	EFB1;BUD14	Downregulated
DNA replication-independent nucleosome organization (GO:0034724)	0.043693	0.106933	0.394844	0.999999	-1.14611	3.58799	HPC2;NHP6A	Downregulated
positive regulation of sequence-specific DNA binding transcription factor activity (GO:0051091)	0.0284395	0.0753722	0.309744	0.999999	-1.00539	3.57915	TOA2;SOD1	Downregulated
N-terminal protein amino acid modification (GO:0031365)	0.0357495	0.0907486	0.352785	0.999999	-1.06114	3.53488	NAT5;MAK3	Downregulated
cellular macromolecular complex assembly (GO:0034622)	0.0182543	0.0562475	0.536872	0.999999	-0.875804	3.50615	THO1;MIC12;RPL38;SKP1	Downregulated
sulfur compound biosynthetic process (GO:0044272)	0.0255578	0.0699082	0.452864	0.999999	-0.954646	3.50051	BIO4;BIO2;ACP1	Downregulated
flavin-containing compound biosynthetic process (GO:0042727)	0.0284395	0.0753722	0.309744	0.999999	-0.981798	3.49518	RIB3;RIB4	Downregulated
hydrogen peroxide metabolic process (GO:0042743)	0.0284395	0.0753722	0.309744	0.999999	-0.979569	3.48724	CTT1;TSA1	Downregulated
regulation of phosphoprotein phosphatase activity (GO:0043666)	0.0357495	0.0907486	0.352785	0.999999	-1.04429	3.47877	GLC8;TFG1	Downregulated
protein import into mitochondrial intermembrane space (GO:0045041)	0.0357495	0.0907486	0.352785	0.999999	-1.03223	3.43858	HSP10;MIA40	Downregulated
positive regulation of translational fidelity (GO:0045903)	0.0522184	0.123385	0.435604	0.999999	-1.16042	3.42594	RPS9A;IMP3	Downregulated
nuclear transport (GO:0051169)	0.0220703	0.0616882	0.421949	0.999999	-0.891576	3.40005	NUP60;SRP40;REI1	Downregulated
'de novo' NAD biosynthetic process (GO:0034627)	0.0284395	0.0753722	0.309744	0.999999	-0.952272	3.39006	BNA1;BNA5	Downregulated
proteasome-mediated ubiquitin-dependent protein catabolic process (GO:0043161)	0.0110845	0.0395102	0.969783	0.999999	-0.732156	3.29632	CDC31;SEM1;SIS1;MDY2;SGT2;SSA1;GIM3;UBC4;UBC1;LCL2;SKP1	Downregulated
fungal-type cell wall organization (GO:0031505)	0.0140251	0.0486362	0.977699	0.999999	-0.768443	3.27887	BAR1;ECM33;ZEO1;CNB1;CCW12;CRH1;CIS3;CWP1;TCO89;SOD1;UTH1	Downregulated
response to reactive oxygen species (GO:0000302)	0.0357495	0.0907486	0.352785	0.999999	-0.979201	3.26193	YAP1;CTT1	Downregulated
positive regulation of protein phosphorylation (GO:0001934)	0.0293231	0.07672	0.483072	0.999999	-0.918663	3.24231	RPP1B;RPP1A;RPP2B	Downregulated
regulation of cytoplasmic translation (GO:2000765)	0.0284395	0.0753722	0.309744	0.999999	-0.904324	3.21937	GIS2;SKP1	Downregulated
rRNA transcription (GO:0009303)	0.0204073	0.0613176	0.560643	0.999999	-0.811135	3.15683	HHT1;RPA12;RPA34;RPA14	Downregulated
transcription of nuclear large rRNA transcript from RNA polymerase I promoter (GO:0042790)	0.0220703	0.0616882	0.421949	0.999999	-0.827601	3.15608	RPA12;RPA34;RPA14	Downregulated
intracellular sterol transport (GO:0032366)	0.043693	0.106933	0.394844	0.999999	-0.979545	3.06653	NPC2;YSP2	Downregulated
peptide catabolic process (GO:0043171)	0.0612769	0.13838	0.474829	0.999999	-1.09121	3.04705	BAR1;GCG1	Downregulated
actin cortical patch assembly (GO:0000147)	0.0255578	0.0699082	0.452864	0.999999	-0.828891	3.03939	PAN1;ABP1;ARC15	Downregulated
regulation of transcription from RNA polymerase II promoter in response to stress (GO:0043618)	0.0204073	0.0613176	0.560643	0.999999	-0.78035	3.03701	YAP1;SUB1;HAA1;CST6	Downregulated
ER-dependent peroxisome organization (GO:0032581)	0.043693	0.106933	0.394844	0.999999	-0.96348	3.01624	RTN2;PEX19	Downregulated
mitochondrial fission (GO:0000266)	0.043693	0.106933	0.394844	0.999999	-0.963469	3.01621	FIS1;SAR1	Downregulated
copper ion transport (GO:0006825)	0.0255578	0.0699082	0.452864	0.999999	-0.821248	3.01136	CCS1;ATX1;COX17	Downregulated
nucleocytoplasmic transport (GO:0006913)	0.0255578	0.0699082	0.452864	0.999999	-0.814073	2.98505	NUP60;SRP40;REI1	Downregulated
mitotic cytokinesis (GO:0000281)	0.0181238	0.0560141	0.671708	0.999999	-0.742683	2.97855	BUD20;TPM2;VHS2;BUD13;STE20	Downregulated
response to nutrient levels (GO:0031667)	0.188205	0.318764	0.564073	0.999999	-1.78264	2.9774	HSP31	Downregulated
protein-cofactor linkage (GO:0018065)	0.043693	0.106933	0.394844	0.999999	-0.945291	2.9593	GCV3;SDH5	Downregulated
receptor-mediated endocytosis (GO:0006898)	0.0357495	0.0907486	0.352785	0.999999	-0.886038	2.95159	CLC1;CMD1	Downregulated
nuclear polyadenylation-dependent CUT catabolic process (GO:0071039)	0.0522184	0.123385	0.435604	0.999999	-0.990532	2.92437	LRP1;MPP6	Downregulated
regulation of cytokinesis (GO:0032465)	0.0522184	0.123385	0.435604	0.999999	-0.968117	2.85819	EDE1;BUD14	Downregulated
glycolytic process (GO:0006096)	0.0293231	0.07672	0.483072	0.999999	-0.807749	2.85085	GPM1;TDH2;TDH1	Downregulated
glycerol metabolic process (GO:0006071)	0.0522184	0.123385	0.435604	0.999999	-0.954356	2.81756	GPP2;TCO89	Downregulated
phospholipid translocation (GO:0045332)	0.0808107	0.172223	0.548065	0.999999	-1.11381	2.80195	MDM35;NEO1	Downregulated
chromatin silencing at rDNA (GO:0000183)	0.0422633	0.105969	0.568439	0.999999	-0.8845	2.79841	NET1;LRS4;DOT6	Downregulated
positive regulation of supramolecular fiber organization (GO:1902905)	0.0293231	0.07672	0.483072	0.999999	-0.788537	2.78305	DAD3;DAD2;SPC19	Downregulated
ATP generation from ADP (GO:0006757)	0.0293231	0.07672	0.483072	0.999999	-0.771921	2.7244	GPM1;TDH2;TDH1	Downregulated
intronic box C/D snoRNA processing (GO:0034965)	0.043693	0.106933	0.394844	0.999999	-0.863058	2.70186	POP6;POP4	Downregulated
regulation of transcription from RNA polymerase III promoter (GO:0006359)	0.0522184	0.123385	0.435604	0.999999	-0.911705	2.69164	NCB2;SUB1	Downregulated
mRNA transport (GO:0051028)	0.0227099	0.063131	0.583737	0.999999	-0.708527	2.68174	SEM1;YRA1;NUP100;GFD1	Downregulated
mRNA-containing ribonucleoprotein complex export from nucleus (GO:0071427)	0.0227099	0.063131	0.583737	0.999999	-0.707378	2.67739	SEM1;YRA1;NUP100;GFD1	Downregulated
negative regulation of transcription, DNA-templated (GO:0045892)	0.0151766	0.0494198	0.964359	0.999999	-0.635438	2.66121	MED11;NCB2;CSE2;SRB7;CYC8;CBF1;BUR6;REG1;ESS1;RPA12	Downregulated
mRNA cis splicing, via spliceosome (GO:0045292)	0.0522184	0.123385	0.435604	0.999999	-0.899751	2.65635	YHC1;CWC15	Downregulated
transcription-coupled nucleotide-excision repair (GO:0006283)	0.0612769	0.13838	0.474829	0.999999	-0.948509	2.64857	YRA1;DEF1	Downregulated
nuclear-transcribed mRNA catabolic process, deadenylation-dependent decay (GO:0000288)	0.0251643	0.0695758	0.606114	0.999999	-0.718004	2.64393	RPB4;EAP1;EDC1;DCP2	Downregulated
double-strand break repair (GO:0006302)	0.0206576	0.0613176	0.876261	0.999999	-0.680969	2.64194	RAD52;RFA3;SEM1;NUP60;FYV6;SUB1;NHP10	Downregulated
fatty acid biosynthetic process (GO:0006633)	0.0333643	0.0864093	0.512462	0.999999	-0.765259	2.60209	CEM1;ACP1;ACB1	Downregulated
vacuolar transport (GO:0007034)	0.0189535	0.0575355	0.918699	0.999999	-0.651318	2.58297	EMP70;DID2;BOS1;VPS51;DID4;VAM3;SNF7;VPS24	Downregulated
intronic snoRNA processing (GO:0031070)	0.043693	0.106933	0.394844	0.999999	-0.823427	2.57779	POP6;POP4	Downregulated
heterocycle biosynthetic process (GO:0018130)	0.0376789	0.0949396	0.540942	0.999999	-0.784779	2.57302	BIO4;BIO2;ACP1	Downregulated
second-messenger-mediated signaling (GO:0019932)	0.0522184	0.123385	0.435604	0.999999	-0.862433	2.54618	CDC31;CMD1	Downregulated
axial cellular bud site selection (GO:0007120)	0.0612769	0.13838	0.474829	0.999999	-0.908696	2.5374	PAN1;AXL2	Downregulated
peptidyl-lysine trimethylation (GO:0018023)	0.0522184	0.123385	0.435604	0.999999	-0.858857	2.53562	LEO1;ESS1	Downregulated
regulation of translational termination (GO:0006449)	0.0522184	0.123385	0.435604	0.999999	-0.858449	2.53442	EFB1;HYP2	Downregulated
regulation of signal transduction (GO:0009966)	0.0612769	0.13838	0.474829	0.999999	-0.903519	2.52294	YAP1;YJU3	Downregulated
eisosome assembly (GO:0070941)	0.0612769	0.13838	0.474829	0.999999	-0.900942	2.51575	EIS1;SEG1	Downregulated
regulation of mitotic nuclear division (GO:0007088)	0.0277723	0.0751615	0.627743	0.999999	-0.695388	2.49208	NET1;STE20;BFR1;SKP1	Downregulated
nuclear-transcribed mRNA catabolic process, endonucleolytic cleavage-dependent decay (GO:0000294)	0.0522184	0.123385	0.435604	0.999999	-0.840583	2.48167	POP6;POP4	Downregulated
regulation of nuclear-transcribed mRNA catabolic process, deadenylation-dependent decay (GO:1900151)	0.0612769	0.13838	0.474829	0.999999	-0.886472	2.47534	IGO1;IGO2	Downregulated
regulation of apoptotic process (GO:0042981)	0.0612769	0.13838	0.474829	0.999999	-0.885896	2.47373	STM1;STE20	Downregulated
regulation of double-strand break repair via nonhomologous end joining (GO:2001032)	0.188205	0.318764	0.564073	0.999999	-1.45696	2.43344	ULS1	Downregulated
homologous chromosome segregation (GO:0045143)	0.0471135	0.114483	0.594898	0.999999	-0.79615	2.43239	LRS4;MPS3;CSM1	Downregulated
calcium-mediated signaling (GO:0019722)	0.0612769	0.13838	0.474829	0.999999	-0.869245	2.42724	CDC31;CMD1	Downregulated
activation of protein kinase activity (GO:0032147)	0.0293231	0.07672	0.483072	0.999999	-0.684732	2.41668	SKG3;PBS2;STE20	Downregulated
lipid translocation (GO:0034204)	0.0912009	0.189247	0.581902	0.999999	-0.982983	2.35394	MDM35;NEO1	Downregulated
regulation of intracellular signal transduction (GO:1902531)	0.188205	0.318764	0.564073	0.999999	-1.39855	2.33589	STE20	Downregulated
negative regulation of chromatin silencing (GO:0031936)	0.0632064	0.140872	0.667717	0.999999	-0.832883	2.29988	HHO1;TBF1;UTH1	Downregulated
regulation of DNA-templated transcription in response to stress (GO:0043620)	0.0808107	0.172223	0.548065	0.999999	-0.909828	2.28881	SUB1;CST6	Downregulated
proton-transporting ATP synthase complex assembly (GO:0043461)	0.0612769	0.13838	0.474829	0.999999	-0.819121	2.28727	ATP14;ATP18	Downregulated
N-terminal protein amino acid acetylation (GO:0006474)	0.0612769	0.13838	0.474829	0.999999	-0.81015	2.26223	NAT5;MAK3	Downregulated
negative regulation of DNA biosynthetic process (GO:2000279)	0.0612769	0.13838	0.474829	0.999999	-0.803822	2.24455	PXR1;TBF1	Downregulated
proteasome assembly (GO:0043248)	0.0305354	0.0794853	0.6486	0.999999	-0.643306	2.24441	SEM1;BLM10;IRC25;TMA17	Downregulated
positive regulation of gene expression (GO:0010628)	0.0522245	0.123385	0.620279	0.999999	-0.755444	2.23022	NUP100;ESC1;UPF3	Downregulated
apoptotic process (GO:0006915)	0.0376789	0.0949396	0.540942	0.999999	-0.676641	2.21847	CPR3;FIS1;TDH2	Downregulated
positive regulation of RNA polymerase II transcriptional preinitiation complex assembly (GO:0045899)	0.0708222	0.15481	0.512353	0.999999	-0.830499	2.19881	DST1;ESS1	Downregulated
ribosome localization (GO:0033750)	0.0808107	0.172223	0.548065	0.999999	-0.858029	2.1585	OM14;NOG1	Downregulated
ubiquitin-dependent protein catabolic process via the multivesicular body sorting pathway (GO:0043162)	0.0277723	0.0751615	0.627743	0.999999	-0.599726	2.14925	DID4;UBC4;SNF7;VPS24	Downregulated
nucleotide metabolic process (GO:0009117)	0.0912009	0.189247	0.581902	0.999999	-0.886438	2.12274	HNT1;ADK1	Downregulated
nicotinamide nucleotide metabolic process (GO:0046496)	0.0471135	0.114483	0.594898	0.999999	-0.692275	2.11503	GPM1;TDH2;TDH1	Downregulated
hyperosmotic response (GO:0006972)	0.0612769	0.13838	0.474829	0.999999	-0.756523	2.11248	PBS2;SUB1	Downregulated
glutathione metabolic process (GO:0006749)	0.0422633	0.105969	0.568439	0.999999	-0.665761	2.10636	GRX2;GCG1;TRX2	Downregulated
chromosome organization (GO:0051276)	0.0233823	0.0648241	0.721681	0.999999	-0.551634	2.07181	KAE1;NUP60;HMO1;NUP1;NUP2	Downregulated
cellular response to unfolded protein (GO:0034620)	0.0708222	0.15481	0.512353	0.999999	-0.781987	2.07038	SSA4;SSA1	Downregulated
protein deubiquitination (GO:0016579)	0.0575908	0.134818	0.644557	0.999999	-0.719602	2.05403	SEM1;SUS1;BRE5	Downregulated
mitochondrial proton-transporting ATP synthase complex assembly (GO:0033615)	0.0612769	0.13838	0.474829	0.999999	-0.718129	2.00527	ATP14;ATP18	Downregulated
regulation of protein phosphorylation (GO:0001932)	0.0912009	0.189247	0.581902	0.999999	-0.835591	2.00098	STE20;ESS1	Downregulated
replication-born double-strand break repair via sister chromatid exchange (GO:1990414)	0.101954	0.208598	0.613835	0.999999	-0.874019	1.99559	LRS4;BUD27	Downregulated
negative regulation of cellular macromolecule biosynthetic process (GO:2000113)	0.0305354	0.0794853	0.6486	0.999999	-0.571124	1.99258	RPL16A;SBP1;CAF20;EAP1	Downregulated
nucleotide-excision repair (GO:0006289)	0.027383	0.0747007	0.75184	0.999999	-0.553174	1.99023	RFA3;YRA1;TFB5;DEF1;HHT1	Downregulated
DNA amplification (GO:0006277)	0.188205	0.318764	0.564073	0.999999	-1.1911	1.9894	RAD52	Downregulated
regulation of macromolecule metabolic process (GO:0060255)	0.0522245	0.123385	0.620279	0.999999	-0.66698	1.96906	NSR1;SKY1;HRP1	Downregulated
G1/S transition of mitotic cell cycle (GO:0000082)	0.0467066	0.114035	0.740911	0.999999	-0.636186	1.94919	YRB1;HPC2;CTR9;SKP1	Downregulated
intracellular lipid transport (GO:0032365)	0.0708222	0.15481	0.512353	0.999999	-0.729166	1.93053	NPC2;YSP2	Downregulated
endoplasmic reticulum organization (GO:0007029)	0.0277723	0.0751615	0.627743	0.999999	-0.532072	1.9068	RTN2;MDY2;SHE3;SEC16	Downregulated
transcriptional open complex formation at RNA polymerase II promoter (GO:0001113)	0.188205	0.318764	0.564073	0.999999	-1.13395	1.89395	TFA1	Downregulated
cellular hyperosmotic response (GO:0071474)	0.188205	0.318764	0.564073	0.999999	-1.13251	1.89154	PBS2	Downregulated
energy reserve metabolic process (GO:0006112)	0.0912009	0.189247	0.581902	0.999999	-0.773077	1.85128	REG1;RGI1	Downregulated
endoplasmic reticulum inheritance (GO:0048309)	0.0808107	0.172223	0.548065	0.999999	-0.731565	1.84036	RTN2;SHE3	Downregulated
protein localization to membrane (GO:0072657)	0.075159	0.162553	0.710678	0.999999	-0.710486	1.83884	EMP70;NUP100;NUP2	Downregulated
response to endoplasmic reticulum stress (GO:0034976)	0.0808107	0.172223	0.548065	0.999999	-0.729177	1.83435	RTN2;IMH1	Downregulated
pyrimidine-containing compound biosynthetic process (GO:0072528)	0.0612769	0.13838	0.474829	0.999999	-0.648354	1.81043	CDD1;FCY1	Downregulated
mRNA splice site selection (GO:0006376)	0.0708222	0.15481	0.512353	0.999999	-0.677683	1.79422	YHC1;SKY1	Downregulated
organic cyclic compound biosynthetic process (GO:1901362)	0.0632064	0.140872	0.667717	0.999999	-0.645588	1.78269	BIO4;BIO2;ACP1	Downregulated
glucose 6-phosphate metabolic process (GO:0051156)	0.101954	0.208598	0.613835	0.999999	-0.779155	1.77899	TKL2;RPE1	Downregulated
maintenance of chromatin silencing at telomere (GO:0035392)	0.188205	0.318764	0.564073	0.999999	-1.06262	1.77482	NUP2	Downregulated
Golgi to plasma membrane transport (GO:0006893)	0.0334548	0.0864249	0.668667	0.999999	-0.519554	1.76521	ARF2;SSO2;COF1;IMH1	Downregulated
regulation of cytoplasmic mRNA processing body assembly (GO:0010603)	0.0808107	0.172223	0.548065	0.999999	-0.700091	1.76118	CAF20;RAS2	Downregulated
regulation of histone H3-K4 methylation (GO:0051569)	0.188205	0.318764	0.564073	0.999999	-1.04557	1.74633	CTR9	Downregulated
fermentation (GO:0006113)	0.215936	0.341954	0.612867	0.999999	-1.11903	1.71522	ADH4	Downregulated
peptidyl-methionine modification (GO:0018206)	0.188205	0.318764	0.564073	0.999999	-1.02264	1.70804	MAK3	Downregulated
protein complex localization (GO:0031503)	0.0912009	0.189247	0.581902	0.999999	-0.712409	1.706	BLM10;ATG8	Downregulated
regulation of formin-nucleated actin cable assembly (GO:0090337)	0.0612769	0.13838	0.474829	0.999999	-0.607742	1.69703	PFY1;BUD14	Downregulated
N-terminal peptidyl-methionine acetylation (GO:0017196)	0.188205	0.318764	0.564073	0.999999	-1.01159	1.68958	MAK3	Downregulated
hexose catabolic process (GO:0019320)	0.188205	0.318764	0.564073	0.999999	-0.997756	1.66648	AMS1	Downregulated
mannose metabolic process (GO:0006013)	0.188205	0.318764	0.564073	0.999999	-0.975482	1.62928	AMS1	Downregulated
regulation of exit from mitosis (GO:0007096)	0.0632064	0.140872	0.667717	0.999999	-0.589214	1.62702	NET1;STE20;SKP1	Downregulated
nuclear mRNA surveillance (GO:0071028)	0.0575908	0.134818	0.644557	0.999999	-0.567596	1.62014	LRP1;SUS1;MPP6	Downregulated
cellular response to osmotic stress (GO:0071470)	0.0690648	0.152599	0.689755	0.999999	-0.604711	1.61622	CTT1;PBS2;HSP12	Downregulated
progressive alteration of chromatin involved in replicative cell aging (GO:0001304)	0.188205	0.318764	0.564073	0.999999	-0.966327	1.61398	UTH1	Downregulated
response to hexose (GO:0009746)	0.188205	0.318764	0.564073	0.999999	-0.964202	1.61043	YCK1	Downregulated
negative regulation of protein ubiquitination (GO:0031397)	0.188205	0.318764	0.564073	0.999999	-0.961377	1.60572	ESS1	Downregulated
chitin biosynthetic process (GO:0006031)	0.188205	0.318764	0.564073	0.999999	-0.958987	1.60172	CRZ1	Downregulated
proton-transporting V-type ATPase complex assembly (GO:0070070)	0.188205	0.318764	0.564073	0.999999	-0.958423	1.60078	VMA22	Downregulated
outer mitochondrial membrane organization (GO:0007008)	0.0912009	0.189247	0.581902	0.999999	-0.663402	1.58864	TOM5;TOM22	Downregulated
RNA import into nucleus (GO:0006404)	0.188205	0.318764	0.564073	0.999999	-0.949721	1.58625	SIS1	Downregulated
nuclear division (GO:0000280)	0.188205	0.318764	0.564073	0.999999	-0.942132	1.57357	EBP2	Downregulated
glutathione catabolic process (GO:0006751)	0.188205	0.318764	0.564073	0.999999	-0.940704	1.57119	GCG1	Downregulated
Golgi to plasma membrane protein transport (GO:0043001)	0.0708222	0.15481	0.512353	0.999999	-0.592194	1.56788	COF1;IMH1	Downregulated
regulation of cell size (GO:0008361)	0.0814817	0.172223	0.730499	0.999999	-0.618582	1.55102	VPS51;SKY1;RPA14	Downregulated
cellular response to DNA damage stimulus (GO:0006974)	0.0319955	0.0830747	0.987981	0.999999	-0.449056	1.54572	RFA3;YNK1;DEF1;DDR48;TSA1;SML1;MMS2;HTA2;LYS20;IES4	Downregulated
RNA processing (GO:0006396)	0.075159	0.162553	0.710678	0.999999	-0.596673	1.54428	LSM7;SPT4;SLU7	Downregulated
positive regulation of dephosphorylation (GO:0035306)	0.188205	0.318764	0.564073	0.999999	-0.91735	1.53218	ESS1	Downregulated
pre-mRNA cleavage required for polyadenylation (GO:0098789)	0.113033	0.227176	0.643867	0.999999	-0.702524	1.53156	FIP1;HRP1	Downregulated
pyridoxine biosynthetic process (GO:0008615)	0.188205	0.318764	0.564073	0.999999	-0.914797	1.52792	SNZ2	Downregulated
proteolysis (GO:0006508)	0.0906555	0.189247	0.868696	0.999999	-0.631782	1.51671	BAR1;DAP2;CPS1;STE24	Downregulated
UDP-N-acetylglucosamine metabolic process (GO:0006047)	0.215936	0.341954	0.612867	0.999999	-0.977774	1.49871	GNA1	Downregulated
protein polyubiquitination (GO:0000209)	0.0365313	0.0925037	0.687934	0.999999	-0.450042	1.48945	SSA1;UBC4;MMS2;UBC1	Downregulated
meiosis I (GO:0007127)	0.113033	0.227176	0.643867	0.999999	-0.681655	1.48606	LRS4;CSM1	Downregulated
protein localization to endoplasmic reticulum (GO:0070972)	0.188205	0.318764	0.564073	0.999999	-0.885774	1.47944	SEC16	Downregulated
retrograde transport, endosome to Golgi (GO:0042147)	0.0542767	0.127644	0.772261	0.999999	-0.506387	1.47544	SNX3;BOS1;VPS51;TLG1	Downregulated
protein insertion into ER membrane (GO:0045048)	0.188205	0.318764	0.564073	0.999999	-0.882929	1.47469	MDY2	Downregulated
selective autophagy (GO:0061912)	0.113033	0.227176	0.643867	0.999999	-0.676001	1.47373	ATG8;BRE5	Downregulated
polyphosphate metabolic process (GO:0006797)	0.0808107	0.172223	0.548065	0.999999	-0.581718	1.4634	PHO90;DDP1	Downregulated
regulation of COPII vesicle coating (GO:0003400)	0.215936	0.341954	0.612867	0.999999	-0.954368	1.46283	SAR1	Downregulated
tRNA processing (GO:0008033)	0.062469	0.140144	0.800554	0.999999	-0.52454	1.4546	POP6;KAE1;POP4;LHP1	Downregulated
regulation of transcription from RNA polymerase II promoter in response to arsenic-containing substance (GO:0061394)	0.188205	0.318764	0.564073	0.999999	-0.868915	1.45128	YAP1	Downregulated
cellular protein complex localization (GO:0034629)	0.113033	0.227176	0.643867	0.999999	-0.664408	1.44846	SEM1;ATG8	Downregulated
DNA conformation change (GO:0071103)	0.0912009	0.189247	0.581902	0.999999	-0.601775	1.44106	RFA3;HMO1	Downregulated
cellular iron ion homeostasis (GO:0006879)	0.062469	0.140144	0.800554	0.999999	-0.519146	1.43964	ATX1;ISU1;ISU2;HAA1	Downregulated
cellular response to decreased oxygen levels (GO:0036294)	0.188205	0.318764	0.564073	0.999999	-0.860467	1.43717	SNF7	Downregulated
regulation of adenylate cyclase activity (GO:0045761)	0.188205	0.318764	0.564073	0.999999	-0.858154	1.43331	RAS2	Downregulated
regulation of mating projection assembly (GO:0031383)	0.215936	0.341954	0.612867	0.999999	-0.924378	1.41686	SPA2	Downregulated
RNA stabilization (GO:0043489)	0.188205	0.318764	0.564073	0.999999	-0.83839	1.4003	IGO1	Downregulated
protein localization to pre-autophagosomal structure (GO:0034497)	0.113033	0.227176	0.643867	0.999999	-0.639728	1.39465	ATG27;ATG8	Downregulated
translational frameshifting (GO:0006452)	0.215936	0.341954	0.612867	0.999999	-0.909017	1.39332	HYP2	Downregulated
mRNA cleavage involved in mRNA processing (GO:0098787)	0.124403	0.245685	0.672023	0.999999	-0.668419	1.39314	FIP1;HRP1	Downregulated
RNA biosynthetic process (GO:0032774)	0.101954	0.208598	0.613835	0.999999	-0.609312	1.3912	CTR9;LEO1	Downregulated
CUT catabolic process (GO:0071034)	0.0912009	0.189247	0.581902	0.999999	-0.577945	1.384	LRP1;MPP6	Downregulated
regulation of mitotic cell cycle (GO:0007346)	0.062469	0.140144	0.800554	0.999999	-0.493134	1.3675	SKG3;PBS2;STE20;BFR1	Downregulated
pentose metabolic process (GO:0019321)	0.188205	0.318764	0.564073	0.999999	-0.811953	1.35614	RPE1	Downregulated
regulation of cellular localization (GO:0060341)	0.188205	0.318764	0.564073	0.999999	-0.803152	1.34145	SPA2	Downregulated
actin cytoskeleton reorganization (GO:0031532)	0.188205	0.318764	0.564073	0.999999	-0.800139	1.33641	TPM1	Downregulated
mRNA stabilization (GO:0048255)	0.188205	0.318764	0.564073	0.999999	-0.798457	1.3336	IGO1	Downregulated
peptide metabolic process (GO:0006518)	0.101744	0.208598	0.783571	0.999999	-0.582718	1.33168	BAR1;GRX2;TRX2	Downregulated
positive regulation of formin-nucleated actin cable assembly (GO:0090338)	0.188205	0.318764	0.564073	0.999999	-0.787849	1.31589	PFY1	Downregulated
free ubiquitin chain polymerization (GO:0010994)	0.188205	0.318764	0.564073	0.999999	-0.778364	1.30004	MMS2	Downregulated
regulation of kinase activity (GO:0043549)	0.215936	0.341954	0.612867	0.999999	-0.841195	1.28936	CDC31	Downregulated
regulation of histone deacetylation (GO:0031063)	0.188205	0.318764	0.564073	0.999999	-0.768383	1.28337	ESS1	Downregulated
negative regulation of chromatin silencing involved in replicative cell aging (GO:0001308)	0.188205	0.318764	0.564073	0.999999	-0.749224	1.25137	UTH1	Downregulated
protein lipoylation (GO:0009249)	0.215936	0.341954	0.612867	0.999999	-0.815343	1.24974	GCV3	Downregulated
positive regulation of cytoplasmic mRNA processing body assembly (GO:0010606)	0.188205	0.318764	0.564073	0.999999	-0.747079	1.24779	CAF20	Downregulated
sterol transport (GO:0015918)	0.0814817	0.172223	0.730499	0.999999	-0.495841	1.24326	NPC2;YSP2;STE20	Downregulated
mRNA 5'-splice site recognition (GO:0000395)	0.188205	0.318764	0.564073	0.999999	-0.743764	1.24225	YHC1	Downregulated
regulation of vesicle targeting, to, from or within Golgi (GO:0048209)	0.242721	0.354719	0.656207	0.999999	-0.861212	1.21934	SAR1	Downregulated
iron ion homeostasis (GO:0055072)	0.071273	0.155463	0.825937	0.999999	-0.459588	1.21388	ATX1;ISU1;ISU2;HAA1	Downregulated
osmosensory signaling pathway via Sho1 osmosensor (GO:0007232)	0.215936	0.341954	0.612867	0.999999	-0.789494	1.21012	STE20	Downregulated
deadenylation-independent decapping of nuclear-transcribed mRNA (GO:0031087)	0.242721	0.354719	0.656207	0.999999	-0.853567	1.20852	DCP2	Downregulated
regulation of vesicle-mediated transport (GO:0060627)	0.136032	0.265069	0.698346	0.999999	-0.605458	1.20781	BUD14;BRE5	Downregulated
negative regulation of apoptotic process (GO:0043066)	0.215936	0.341954	0.612867	0.999999	-0.779951	1.19549	STM1	Downregulated
glucose metabolic process (GO:0006006)	0.0947822	0.195883	0.766918	0.999999	-0.501795	1.18232	GPM1;TDH2;TDH1	Downregulated
maintenance of chromatin silencing (GO:0006344)	0.188205	0.318764	0.564073	0.999999	-0.707061	1.18095	NUP2	Downregulated
septin ring assembly (GO:0000921)	0.147889	0.283315	0.722895	0.999999	-0.61225	1.17019	BNI5;SKP1	Downregulated
negative regulation of microtubule polymerization or depolymerization (GO:0031111)	0.188205	0.318764	0.564073	0.999999	-0.697748	1.1654	BIK1	Downregulated
inositol phosphate catabolic process (GO:0071545)	0.242721	0.354719	0.656207	0.999999	-0.82141	1.16299	DDP1	Downregulated
NADP metabolic process (GO:0006739)	0.113033	0.227176	0.643867	0.999999	-0.531923	1.15963	TKL2;RPE1	Downregulated
histone modification (GO:0016570)	0.0585242	0.13669	0.934915	0.999999	-0.402252	1.14172	SEM1;HEL2;TAF14;CPR1;SUS1;FPR4	Downregulated
DNA-templated transcriptional open complex formation (GO:0001112)	0.242721	0.354719	0.656207	0.999999	-0.797404	1.129	TFA1	Downregulated
postreplication repair (GO:0006301)	0.136032	0.265069	0.698346	0.999999	-0.565003	1.1271	RAD52;MMS2	Downregulated
microtubule nucleation (GO:0007020)	0.136032	0.265069	0.698346	0.999999	-0.562007	1.12113	CDC31;SPC42	Downregulated
DNA metabolic process (GO:0006259)	0.052408	0.123533	0.999013	0.999999	-0.379943	1.12034	RAD52;RFA3;KAE1;DEF1;RPS16B;STM1;ADK1;DDR48;TSA1;HTA2;LYS20;UPF3	Downregulated
mitochondrial DNA metabolic process (GO:0032042)	0.215936	0.341954	0.612867	0.999999	-0.725983	1.11277	RIM1	Downregulated
translational elongation (GO:0006414)	0.075159	0.162553	0.710678	0.999999	-0.429522	1.11167	EFB1;HYP2;STM1	Downregulated
cellular hyperosmotic salinity response (GO:0071475)	0.215936	0.341954	0.612867	0.999999	-0.720025	1.10364	CRZ1	Downregulated
protein polymerization (GO:0051258)	0.242721	0.354719	0.656207	0.999999	-0.776583	1.09952	MMS2	Downregulated
establishment of spindle localization (GO:0051293)	0.215936	0.341954	0.612867	0.999999	-0.716349	1.098	DYN2	Downregulated
regulation of ER to Golgi vesicle-mediated transport by GTP hydrolysis (GO:0090113)	0.215936	0.341954	0.612867	0.999999	-0.716058	1.09756	SAR1	Downregulated
ribonucleoside bisphosphate biosynthetic process (GO:0034030)	0.242721	0.354719	0.656207	0.999999	-0.774135	1.09605	CAB3	Downregulated
pyrimidine deoxyribonucleoside monophosphate biosynthetic process (GO:0009177)	0.188205	0.318764	0.564073	0.999999	-0.653983	1.0923	DUT1	Downregulated
inositol phosphate dephosphorylation (GO:0046855)	0.242721	0.354719	0.656207	0.999999	-0.766019	1.08456	DDP1	Downregulated
regulation of mRNA splicing, via spliceosome (GO:0048024)	0.188205	0.318764	0.564073	0.999999	-0.644417	1.07632	RPL30	Downregulated
positive regulation of mitotic cell cycle phase transition (GO:1901992)	0.113033	0.227176	0.643867	0.999999	-0.491581	1.07168	IGO1;IGO2	Downregulated
positive regulation of actin filament bundle assembly (GO:0032233)	0.215936	0.341954	0.612867	0.999999	-0.698658	1.07089	PFY1	Downregulated
ribophagy (GO:0034517)	0.215936	0.341954	0.612867	0.999999	-0.697541	1.06917	BRE5	Downregulated
monocarboxylic acid biosynthetic process (GO:0072330)	0.0814817	0.172223	0.730499	0.999999	-0.425057	1.06578	BIO4;BIO2;CEM1	Downregulated
positive regulation of transcription from RNA polymerase II promoter in response to arsenic-containing substance (GO:0061395)	0.188205	0.318764	0.564073	0.999999	-0.634353	1.05951	YAP1	Downregulated
double-strand break repair via single-strand annealing (GO:0045002)	0.242721	0.354719	0.656207	0.999999	-0.741319	1.04959	RAD52	Downregulated
snoRNA 3'-end processing (GO:0031126)	0.0814817	0.172223	0.730499	0.999999	-0.416249	1.04369	PXR1;LRP1;CTR9	Downregulated
alcohol biosynthetic process (GO:0046165)	0.268592	0.36636	0.694703	0.999999	-0.791592	1.0406	ADH4	Downregulated
microtubule polymerization (GO:0046785)	0.147889	0.283315	0.722895	0.999999	-0.542485	1.03685	CDC31;SPC42	Downregulated
nucleotide-sugar biosynthetic process (GO:0009226)	0.188205	0.318764	0.564073	0.999999	-0.614329	1.02607	GNA1	Downregulated
regulation of response to endoplasmic reticulum stress (GO:1905897)	0.215936	0.341954	0.612867	0.999999	-0.668454	1.02459	YAP1	Downregulated
regulation of telomerase activity (GO:0051972)	0.242721	0.354719	0.656207	0.999999	-0.723592	1.02449	SBA1	Downregulated
positive regulation of cellular protein metabolic process (GO:0032270)	0.242721	0.354719	0.656207	0.999999	-0.719648	1.01891	UPF3	Downregulated
positive regulation of ATPase activity (GO:0032781)	0.293581	0.377303	0.728895	0.999999	-0.819017	1.00379	DYN2	Downregulated
isoleucine metabolic process (GO:0006549)	0.188205	0.318764	0.564073	0.999999	-0.595485	0.994595	MMF1	Downregulated
RNA methylation (GO:0001510)	0.123776	0.245394	0.827705	0.999999	-0.470118	0.982207	SPB1;ABP140;TRM112	Downregulated
endonucleolytic cleavage involved in rRNA processing (GO:0000478)	0.188205	0.318764	0.564073	0.999999	-0.580677	0.969862	RPS27B	Downregulated
chromatin silencing at telomere (GO:0006348)	0.0672579	0.148928	0.898286	0.999999	-0.35905	0.969155	MPS3;SDC1;ESC1;DOT6;NUP2	Downregulated
2-micrometer plasmid partitioning (GO:0030543)	0.188205	0.318764	0.564073	0.999999	-0.576825	0.963428	BIK1	Downregulated
tRNA transport (GO:0051031)	0.159944	0.302445	0.745735	0.999999	-0.520397	0.953852	NSP1;SIS1	Downregulated
nuclear pore complex assembly (GO:0051292)	0.242721	0.354719	0.656207	0.999999	-0.669424	0.947799	DYN2	Downregulated
pyrimidine deoxyribonucleotide biosynthetic process (GO:0009221)	0.215936	0.341954	0.612867	0.999999	-0.616401	0.944804	DUT1	Downregulated
ATP-dependent chromatin remodeling (GO:0043044)	0.123776	0.245394	0.827705	0.999999	-0.446623	0.93312	SWR1;DPB4;LDB7	Downregulated
negative regulation of macromolecule metabolic process (GO:0010605)	0.242721	0.354719	0.656207	0.999999	-0.658841	0.932815	STE20	Downregulated
regulation of actin cytoskeleton reorganization (GO:2000249)	0.242721	0.354719	0.656207	0.999999	-0.658184	0.931886	SPA2	Downregulated
tryptophan metabolic process (GO:0006568)	0.113033	0.227176	0.643867	0.999999	-0.423424	0.923097	BNA1;BNA5	Downregulated
double-strand break repair via homologous recombination (GO:0000724)	0.0672579	0.148928	0.898286	0.999999	-0.34126	0.921135	RAD52;RFA3;SEM1;LRS4;BUD27	Downregulated
exonucleolytic trimming to generate mature 3'-end of 5.8S rRNA from tricistronic rRNA transcript (SSU-rRNA, 5.8S rRNA, LSU-rRNA) (GO:0000467)	0.136032	0.265069	0.698346	0.999999	-0.453796	0.90526	LRP1;MPP6	Downregulated
positive regulation of transcription from RNA polymerase II promoter in response to heat stress (GO:0061408)	0.147889	0.283315	0.722895	0.999999	-0.473491	0.90498	NCB2;BUR6	Downregulated
positive regulation of helicase activity (GO:0051096)	0.215936	0.341954	0.612867	0.999999	-0.588206	0.901587	RIM1	Downregulated
protein localization to chromosome (GO:0034502)	0.159944	0.302445	0.745735	0.999999	-0.486696	0.892081	LRS4;CSM1	Downregulated
regulation of mitochondrial translation (GO:0070129)	0.113033	0.227176	0.643867	0.999999	-0.405589	0.884214	CBP6;COX14	Downregulated
regulation of helicase activity (GO:0051095)	0.242721	0.354719	0.656207	0.999999	-0.619595	0.877249	RIM1	Downregulated
organelle disassembly (GO:1903008)	0.147889	0.283315	0.722895	0.999999	-0.452835	0.865501	SSA1;ATG8	Downregulated
regulation of DNA biosynthetic process (GO:2000278)	0.215936	0.341954	0.612867	0.999999	-0.56339	0.86355	SBA1	Downregulated
protein-DNA complex disassembly (GO:0032986)	0.172171	0.318764	0.766941	0.999999	-0.489512	0.861183	RTT102;LDB7	Downregulated
7-methylguanosine RNA capping (GO:0009452)	0.268592	0.36636	0.694703	0.999999	-0.651004	0.855785	SPT4	Downregulated
nuclear mRNA surveillance of mRNA 3'-end processing (GO:0071031)	0.268592	0.36636	0.694703	0.999999	-0.650627	0.855289	MPP6	Downregulated
ubiquitin-dependent catabolism of misfolded proteins by nucleus-associated proteasome (GO:0071630)	0.188205	0.318764	0.564073	0.999999	-0.51118	0.853786	SIS1	Downregulated
pyrimidine nucleobase metabolic process (GO:0006206)	0.188205	0.318764	0.564073	0.999999	-0.506646	0.846213	FCY1	Downregulated
cellular sphingolipid homeostasis (GO:0090156)	0.215936	0.341954	0.612867	0.999999	-0.548645	0.84095	VPS51	Downregulated
Rho protein signal transduction (GO:0007266)	0.124403	0.245685	0.672023	0.999999	-0.398479	0.83052	STE20;RDI1	Downregulated
amino acid catabolic process via Ehrlich pathway (GO:0000955)	0.215936	0.341954	0.612867	0.999999	-0.538579	0.82552	ADH4	Downregulated
inositol phosphate metabolic process (GO:0043647)	0.215936	0.341954	0.612867	0.999999	-0.537127	0.823295	DDP1	Downregulated
protein localization to cell cortex (GO:0072697)	0.215936	0.341954	0.612867	0.999999	-0.536609	0.822501	ABP1	Downregulated
global genome nucleotide-excision repair (GO:0070911)	0.242721	0.354719	0.656207	0.999999	-0.578799	0.819489	HHT1	Downregulated
mRNA polyadenylation (GO:0006378)	0.184543	0.318764	0.786594	0.999999	-0.483759	0.817492	FIP1;HRP1	Downregulated
misfolded or incompletely synthesized protein catabolic process (GO:0006515)	0.075159	0.162553	0.710678	0.999999	-0.314619	0.814282	SIS1;GIM3;UBC4	Downregulated
nuclear-transcribed mRNA catabolic process, deadenylation-independent decay (GO:0031086)	0.268592	0.36636	0.694703	0.999999	-0.619403	0.814242	DCP2	Downregulated
regulation of protein complex disassembly (GO:0043244)	0.242721	0.354719	0.656207	0.999999	-0.571655	0.809374	EFB1	Downregulated
negative regulation of invasive growth in response to glucose limitation (GO:2000218)	0.215936	0.341954	0.612867	0.999999	-0.527119	0.807954	DIG1	Downregulated
mitochondrial translational initiation (GO:0070124)	0.242721	0.354719	0.656207	0.999999	-0.569646	0.80653	MRP21	Downregulated
negative regulation of transposition (GO:0010529)	0.268592	0.36636	0.694703	0.999999	-0.612591	0.805288	RTT103	Downregulated
peroxisome inheritance (GO:0045033)	0.188205	0.318764	0.564073	0.999999	-0.480687	0.802856	PEX19	Downregulated
pentose catabolic process (GO:0019323)	0.215936	0.341954	0.612867	0.999999	-0.523121	0.801827	RPE1	Downregulated
plasma membrane bounded cell projection assembly (GO:0120031)	0.268592	0.36636	0.694703	0.999999	-0.60167	0.790931	DYN2	Downregulated
regulation of protein complex assembly (GO:0043254)	0.184543	0.318764	0.786594	0.999999	-0.467978	0.790825	SAR1;SKP1	Downregulated
cellular response to alkaline pH (GO:0071469)	0.242721	0.354719	0.656207	0.999999	-0.551181	0.780386	CRZ1	Downregulated
regulation of pseudohyphal growth (GO:2000220)	0.184543	0.318764	0.786594	0.999999	-0.459161	0.775924	RAS2;DIG1	Downregulated
pyridoxine metabolic process (GO:0008614)	0.242721	0.354719	0.656207	0.999999	-0.544125	0.770395	SNZ2	Downregulated
pyruvate metabolic process (GO:0006090)	0.101744	0.208598	0.783571	0.999999	-0.334542	0.764527	GPM1;TDH2;TDH1	Downregulated
regulation of gluconeogenesis (GO:0006111)	0.136032	0.265069	0.698346	0.999999	-0.382161	0.762359	SDH7;TSA1	Downregulated
mitotic spindle organization (GO:0007052)	0.116249	0.231819	0.813927	0.999999	-0.353628	0.761013	BIK1;UBC9;YHR127W	Downregulated
very long-chain fatty acid metabolic process (GO:0000038)	0.242721	0.354719	0.656207	0.999999	-0.533472	0.755313	ACB1	Downregulated
nuclear polyadenylation-dependent ncRNA catabolic process (GO:0071046)	0.159944	0.302445	0.745735	0.999999	-0.408534	0.748815	LRP1;MPP6	Downregulated
mitochondrion disassembly (GO:0061726)	0.139335	0.269962	0.852652	0.999999	-0.379256	0.747465	FIS1;ATG8;UTH1	Downregulated
DNA biosynthetic process (GO:0071897)	0.293581	0.377303	0.728895	0.999999	-0.607072	0.744029	RAD52	Downregulated
positive regulation of phosphorylation of RNA polymerase II C-terminal domain (GO:1901409)	0.268592	0.36636	0.694703	0.999999	-0.5514	0.724849	CTR9	Downregulated
DNA repair (GO:0006281)	0.0648481	0.144217	0.997036	0.999999	-0.264918	0.724738	RAD52;RFA3;NUP60;TFB5;DDR48;NHP10;MMS2;HTA2;LYS20;NHP6A	Downregulated
peroxisome organization (GO:0007031)	0.116249	0.231819	0.813927	0.999999	-0.327927	0.705704	RTN2;FIS1;PEX19	Downregulated
ornithine metabolic process (GO:0006591)	0.293581	0.377303	0.728895	0.999999	-0.570939	0.699743	ARG7	Downregulated
negative regulation of transcription by pheromones (GO:0045996)	0.293581	0.377303	0.728895	0.999999	-0.569824	0.698376	DIG1	Downregulated
nuclear polyadenylation-dependent rRNA catabolic process (GO:0071035)	0.147889	0.283315	0.722895	0.999999	-0.36226	0.692386	LRP1;MPP6	Downregulated
actin filament capping (GO:0051693)	0.268592	0.36636	0.694703	0.999999	-0.522465	0.686812	ABP1	Downregulated
coenzyme biosynthetic process (GO:0009108)	0.123776	0.245394	0.827705	0.999999	-0.327102	0.683408	CAB3;SNZ2;ACP1	Downregulated
non-recombinational repair (GO:0000726)	0.0947822	0.195883	0.766918	0.999999	-0.285715	0.673195	RAD52;FYV6;SUB1	Downregulated
telomere organization (GO:0032200)	0.172233	0.318764	0.893242	0.999999	-0.381564	0.671136	KAE1;DEF1;STM1	Downregulated
vacuolar proton-transporting V-type ATPase complex assembly (GO:0070072)	0.188205	0.318764	0.564073	0.999999	-0.39989	0.667906	VMA22	Downregulated
adenylate cyclase-modulating G-protein coupled receptor signaling pathway (GO:0007188)	0.242721	0.354719	0.656207	0.999999	-0.470998	0.66686	CYR1	Downregulated
regulation of phosphate transport (GO:0010966)	0.188205	0.318764	0.564073	0.999999	-0.397977	0.664711	PHO90	Downregulated
phospholipid transport (GO:0015914)	0.222298	0.351486	0.837047	0.999999	-0.437841	0.658396	MDM35;NEO1	Downregulated
regulation of transport (GO:0051049)	0.242721	0.354719	0.656207	0.999999	-0.464448	0.657585	BUD14	Downregulated
Ras protein signal transduction (GO:0007265)	0.163807	0.308042	0.884158	0.999999	-0.362227	0.655291	CYR1;STE20;RDI1	Downregulated
tryptophan catabolic process (GO:0006569)	0.242721	0.354719	0.656207	0.999999	-0.462508	0.654838	BNA5	Downregulated
cellular response to water deprivation (GO:0042631)	0.242721	0.354719	0.656207	0.999999	-0.455685	0.645178	STF2	Downregulated
phosphatidylinositol phosphorylation (GO:0046854)	0.242721	0.354719	0.656207	0.999999	-0.438328	0.620604	MSS4	Downregulated
organelle fusion (GO:0048284)	0.268592	0.36636	0.694703	0.999999	-0.464631	0.610785	MPS3	Downregulated
macromolecular complex assembly (GO:0065003)	0.209629	0.341954	0.821563	0.999999	-0.389828	0.609074	MIC12;SKP1	Downregulated
dephosphorylation of RNA polymerase II C-terminal domain (GO:0070940)	0.215936	0.341954	0.612867	0.999999	-0.395905	0.606833	TFG1	Downregulated
protein maturation (GO:0051604)	0.163807	0.308042	0.884158	0.999999	-0.334839	0.605745	DAP2;GCV3;STE24	Downregulated
negative regulation of transcription from RNA polymerase I promoter (GO:0016479)	0.293581	0.377303	0.728895	0.999999	-0.491811	0.602764	SPT4	Downregulated
coenzyme A metabolic process (GO:0015936)	0.268592	0.36636	0.694703	0.999999	-0.451717	0.593809	CAB3	Downregulated
nucleoside phosphate biosynthetic process (GO:1901293)	0.268592	0.36636	0.694703	0.999999	-0.448381	0.589424	YNK1	Downregulated
ncRNA transcription (GO:0098781)	0.268592	0.36636	0.694703	0.999999	-0.448378	0.589419	HHT1	Downregulated
glycogen metabolic process (GO:0005977)	0.197036	0.330982	0.804773	0.999999	-0.360485	0.585561	GLC8;REG1	Downregulated
mitochondrion localization (GO:0051646)	0.268592	0.36636	0.694703	0.999999	-0.445334	0.585419	ARC18	Downregulated
cilium assembly (GO:0060271)	0.268592	0.36636	0.694703	0.999999	-0.443807	0.583412	DYN2	Downregulated
pore complex assembly (GO:0046931)	0.242721	0.354719	0.656207	0.999999	-0.410859	0.581711	DYN2	Downregulated
DNA replication-independent nucleosome assembly (GO:0006336)	0.215936	0.341954	0.612867	0.999999	-0.378724	0.580498	HPC2	Downregulated
L-serine metabolic process (GO:0006563)	0.242721	0.354719	0.656207	0.999999	-0.408788	0.57878	CHA1	Downregulated
kinetochore assembly (GO:0051382)	0.293581	0.377303	0.728895	0.999999	-0.456308	0.559251	SKP1	Downregulated
very long-chain fatty acid biosynthetic process (GO:0042761)	0.215936	0.341954	0.612867	0.999999	-0.361207	0.55365	ACB1	Downregulated
telomere maintenance via telomere lengthening (GO:0010833)	0.136032	0.265069	0.698346	0.999999	-0.276922	0.552421	RFA3;TBF1	Downregulated
septin ring organization (GO:0031106)	0.116249	0.231819	0.813927	0.999999	-0.256335	0.551638	BNI5;VHS2;SKP1	Downregulated
lysine biosynthetic process (GO:0009085)	0.293581	0.377303	0.728895	0.999999	-0.448122	0.549219	LYS20	Downregulated
establishment of protein localization to membrane (GO:0090150)	0.116249	0.231819	0.813927	0.999999	-0.254488	0.547662	COF1;AST2;IMH1	Downregulated
regulation of translational elongation (GO:0006448)	0.268592	0.36636	0.694703	0.999999	-0.411195	0.540541	HYP2	Downregulated
negative regulation of pseudohyphal growth (GO:2000221)	0.317717	0.395889	0.759263	0.999999	-0.464314	0.532379	DIG1	Downregulated
regulation of cellular respiration (GO:0043457)	0.242721	0.354719	0.656207	0.999999	-0.374166	0.52976	SOD1	Downregulated
meiotic recombination checkpoint (GO:0051598)	0.293581	0.377303	0.728895	0.999999	-0.431615	0.528987	FPR3	Downregulated
positive regulation of cellular component organization (GO:0051130)	0.293581	0.377303	0.728895	0.999999	-0.428878	0.525633	CLC1	Downregulated
age-dependent response to oxidative stress involved in chronological cell aging (GO:0001324)	0.215936	0.341954	0.612867	0.999999	-0.337241	0.516915	SOD1	Downregulated
anatomical structure homeostasis (GO:0060249)	0.163807	0.308042	0.884158	0.999999	-0.285237	0.516013	KAE1;DEF1;STM1	Downregulated
cellular response to nutrient levels (GO:0031669)	0.197036	0.330982	0.804773	0.999999	-0.315062	0.511777	PRB1;HSP31	Downregulated
regulation of intracellular transport (GO:0032386)	0.293581	0.377303	0.728895	0.999999	-0.413196	0.506414	BRE5	Downregulated
pyridoxal phosphate metabolic process (GO:0042822)	0.268592	0.36636	0.694703	0.999999	-0.384739	0.505762	SNZ2	Downregulated
tRNA methylation (GO:0030488)	0.184543	0.318764	0.786594	0.999999	-0.298575	0.504555	ABP140;TRM112	Downregulated
histone ubiquitination (GO:0016574)	0.293581	0.377303	0.728895	0.999999	-0.400181	0.490462	HEL2	Downregulated
Golgi to vacuole transport (GO:0006896)	0.235026	0.354719	0.851305	0.999999	-0.33695	0.487924	BOS1;VAM3	Downregulated
glucan biosynthetic process (GO:0009250)	0.293581	0.377303	0.728895	0.999999	-0.396287	0.48569	GLC8	Downregulated
cellular response to starvation (GO:0009267)	0.20705	0.341954	0.92351	0.999999	-0.308354	0.485595	PRB1;ATG8;REG1	Downregulated
heterochromatin organization (GO:0070828)	0.268592	0.36636	0.694703	0.999999	-0.364969	0.479774	DPB4	Downregulated
sulfate assimilation (GO:0000103)	0.293581	0.377303	0.728895	0.999999	-0.391099	0.479332	TRX2	Downregulated
regulation of cell division (GO:0051302)	0.242721	0.354719	0.656207	0.999999	-0.334445	0.473521	BUD14	Downregulated
small GTPase mediated signal transduction (GO:0007264)	0.184543	0.318764	0.786594	0.999999	-0.278528	0.470677	CYR1;RDI1	Downregulated
barbed-end actin filament capping (GO:0051016)	0.268592	0.36636	0.694703	0.999999	-0.353582	0.464805	ABP1	Downregulated
purine nucleoside bisphosphate biosynthetic process (GO:0034033)	0.242721	0.354719	0.656207	0.999999	-0.324196	0.459011	CAB3	Downregulated
cellular response to oxygen-containing compound (GO:1901701)	0.317717	0.395889	0.759263	0.999999	-0.393936	0.451684	CST6	Downregulated
mitochondrial electron transport, succinate to ubiquinone (GO:0006121)	0.268592	0.36636	0.694703	0.999999	-0.337711	0.443941	SDH5	Downregulated
N-glycan processing (GO:0006491)	0.293581	0.377303	0.728895	0.999999	-0.361553	0.44312	OCH1	Downregulated
nuclear envelope organization (GO:0006998)	0.268592	0.36636	0.694703	0.999999	-0.334185	0.439306	MPS3	Downregulated
sulfur compound catabolic process (GO:0044273)	0.268592	0.36636	0.694703	0.999999	-0.333136	0.437927	GCG1	Downregulated
chromatin disassembly (GO:0031498)	0.159944	0.302445	0.745735	0.999999	-0.238349	0.436878	RTT102;LDB7	Downregulated
negative regulation of transposition, RNA-mediated (GO:0010526)	0.268592	0.36636	0.694703	0.999999	-0.331862	0.436253	RTT103	Downregulated
threonine metabolic process (GO:0006566)	0.268592	0.36636	0.694703	0.999999	-0.326676	0.429435	CHA1	Downregulated
positive regulation of cellular amide metabolic process (GO:0034250)	0.215936	0.341954	0.612867	0.999999	-0.277845	0.425874	UPF3	Downregulated
pyridoxal phosphate biosynthetic process (GO:0042823)	0.293581	0.377303	0.728895	0.999999	-0.339723	0.416365	SNZ2	Downregulated
protein localization to plasma membrane (GO:0072659)	0.209629	0.341954	0.821563	0.999999	-0.266074	0.415719	COF1;IMH1	Downregulated
mitochondrial outer membrane translocase complex assembly (GO:0070096)	0.317717	0.395889	0.759263	0.999999	-0.359333	0.412009	TOM5	Downregulated
positive regulation of DNA-dependent DNA replication (GO:2000105)	0.293581	0.377303	0.728895	0.999999	-0.334065	0.40943	RIM1	Downregulated
cilium organization (GO:0044782)	0.293581	0.377303	0.728895	0.999999	-0.334023	0.409378	DYN2	Downregulated
attachment of mitotic spindle microtubules to kinetochore (GO:0051315)	0.34103	0.408517	0.786235	0.999999	-0.372808	0.40106	CSM1	Downregulated
regulation of phosphorylation of RNA polymerase II C-terminal domain (GO:1901407)	0.268592	0.36636	0.694703	0.999999	-0.304148	0.399821	ESS1	Downregulated
glucose mediated signaling pathway (GO:0010255)	0.268592	0.36636	0.694703	0.999999	-0.303971	0.399588	YCK1	Downregulated
chitin metabolic process (GO:0006030)	0.268592	0.36636	0.694703	0.999999	-0.303012	0.398328	CRH1	Downregulated
nucleosome disassembly (GO:0006337)	0.159944	0.302445	0.745735	0.999999	-0.217129	0.397983	RTT102;LDB7	Downregulated
positive regulation of actin filament polymerization (GO:0030838)	0.242721	0.354719	0.656207	0.999999	-0.280892	0.397699	BZZ1	Downregulated
cellular ion homeostasis (GO:0006873)	0.197036	0.330982	0.804773	0.999999	-0.244129	0.396556	CNB1;SKY1	Downregulated
positive regulation of pseudohyphal growth (GO:2000222)	0.34103	0.408517	0.786235	0.999999	-0.362272	0.389727	RAS2	Downregulated
snoRNA metabolic process (GO:0016074)	0.268592	0.36636	0.694703	0.999999	-0.293861	0.386298	GAR1	Downregulated
exonucleolytic trimming involved in rRNA processing (GO:0000459)	0.159944	0.302445	0.745735	0.999999	-0.208405	0.381992	LRP1;MPP6	Downregulated
regulation of MAPK cascade (GO:0043408)	0.317717	0.395889	0.759263	0.999999	-0.327684	0.375721	STE20	Downregulated
positive regulation of protein localization to nucleus (GO:1900182)	0.242721	0.354719	0.656207	0.999999	-0.265033	0.375245	SKY1	Downregulated
generation of catalytic spliceosome for second transesterification step (GO:0000350)	0.293581	0.377303	0.728895	0.999999	-0.304635	0.373361	SLU7	Downregulated
regulation of small GTPase mediated signal transduction (GO:0051056)	0.215936	0.341954	0.612867	0.999999	-0.243151	0.372695	TFS1	Downregulated
negative regulation of transcription from RNA polymerase II promoter by pheromones (GO:0046020)	0.34103	0.408517	0.786235	0.999999	-0.337612	0.363198	DIG1	Downregulated
lipid phosphorylation (GO:0046834)	0.242721	0.354719	0.656207	0.999999	-0.253303	0.358637	MSS4	Downregulated
RNA polyadenylation (GO:0043631)	0.235026	0.354719	0.851305	0.999999	-0.242947	0.351801	FIP1;HRP1	Downregulated
tRNA wobble base modification (GO:0002097)	0.235026	0.354719	0.851305	0.999999	-0.241174	0.349235	ISU1;ISU2	Downregulated
proteolysis involved in cellular protein catabolic process (GO:0051603)	0.14735	0.283315	0.863902	0.999999	-0.18193	0.348387	RPL40B;CPS1;RPS31	Downregulated
regulation of response to DNA damage stimulus (GO:2001020)	0.293581	0.377303	0.728895	0.999999	-0.280265	0.343493	CYC8	Downregulated
DNA recombination (GO:0006310)	0.148452	0.283863	0.938193	0.999999	-0.175708	0.335162	RAD52;RFA3;RPS16B;UPF3	Downregulated
regulation of organelle assembly (GO:1902115)	0.268592	0.36636	0.694703	0.999999	-0.248516	0.326689	RAS2	Downregulated
regulation of protein export from nucleus (GO:0046825)	0.268592	0.36636	0.694703	0.999999	-0.246486	0.324021	SPN1	Downregulated
positive regulation of cell growth (GO:0030307)	0.293581	0.377303	0.728895	0.999999	-0.263514	0.322963	RAS2	Downregulated
aromatic amino acid family metabolic process (GO:0009072)	0.293581	0.377303	0.728895	0.999999	-0.262707	0.321975	BNA5	Downregulated
kinetochore organization (GO:0051383)	0.34103	0.408517	0.786235	0.999999	-0.295577	0.317977	SKP1	Downregulated
regulation of chromatin silencing at rDNA (GO:0061187)	0.317717	0.395889	0.759263	0.999999	-0.273935	0.314092	ESS1	Downregulated
coenzyme A biosynthetic process (GO:0015937)	0.242721	0.354719	0.656207	0.999999	-0.221741	0.31395	CAB3	Downregulated
phosphorylated carbohydrate dephosphorylation (GO:0046838)	0.293581	0.377303	0.728895	0.999999	-0.254495	0.31191	DDP1	Downregulated
alpha-amino acid metabolic process (GO:1901605)	0.293581	0.377303	0.728895	0.999999	-0.25222	0.309122	HPA3	Downregulated
cellular potassium ion homeostasis (GO:0030007)	0.215936	0.341954	0.612867	0.999999	-0.200815	0.307805	CRZ1	Downregulated
cytokinesis, site selection (GO:0007105)	0.293581	0.377303	0.728895	0.999999	-0.248509	0.304573	VHS2	Downregulated
reticulophagy (GO:0061709)	0.293581	0.377303	0.728895	0.999999	-0.247857	0.303774	ATG8	Downregulated
replicative cell aging (GO:0001302)	0.172233	0.318764	0.893242	0.999999	-0.1696	0.298311	MDH1;RAS2;TSA1	Downregulated
recombinational repair (GO:0000725)	0.139335	0.269962	0.852652	0.999999	-0.151289	0.298172	RAD52;RFA3;SEM1	Downregulated
centromere complex assembly (GO:0034508)	0.363548	0.427974	0.810189	0.999999	-0.291956	0.295415	SKP1	Downregulated
cellular modified amino acid catabolic process (GO:0042219)	0.293581	0.377303	0.728895	0.999999	-0.239609	0.293666	GCG1	Downregulated
positive regulation of transport (GO:0051050)	0.317717	0.395889	0.759263	0.999999	-0.248737	0.2852	CLC1	Downregulated
glycoprotein metabolic process (GO:0009100)	0.34103	0.408517	0.786235	0.999999	-0.262356	0.282239	OCH1	Downregulated
meiosis II (GO:0007135)	0.293581	0.377303	0.728895	0.999999	-0.225802	0.276743	CSM1	Downregulated
DNA strand renaturation (GO:0000733)	0.293581	0.377303	0.728895	0.999999	-0.221123	0.271008	RAD52	Downregulated
proteasome regulatory particle assembly (GO:0070682)	0.34103	0.408517	0.786235	0.999999	-0.249929	0.26887	TMA17	Downregulated
regulation of ribosomal protein gene transcription from RNA polymerase II promoter (GO:0060962)	0.34103	0.408517	0.786235	0.999999	-0.24962	0.268537	HMO1	Downregulated
heteroduplex formation (GO:0030491)	0.268592	0.36636	0.694703	0.999999	-0.199926	0.262815	RFA3	Downregulated
rRNA base methylation (GO:0070475)	0.242721	0.354719	0.656207	0.999999	-0.183504	0.259813	TRM112	Downregulated
negative regulation of cell growth (GO:0030308)	0.293581	0.377303	0.728895	0.999999	-0.209049	0.256211	DIG1	Downregulated
phosphate ion transport (GO:0006817)	0.317717	0.395889	0.759263	0.999999	-0.217687	0.249598	PHO90	Downregulated
nucleosome positioning (GO:0016584)	0.34103	0.408517	0.786235	0.999999	-0.219536	0.236173	CYC8	Downregulated
7-methylguanosine mRNA capping (GO:0006370)	0.268592	0.36636	0.694703	0.999999	-0.178841	0.235097	SPT4	Downregulated
chromatin organization involved in negative regulation of transcription (GO:0097549)	0.242721	0.354719	0.656207	0.999999	-0.165394	0.234171	DPB4	Downregulated
protein neddylation (GO:0045116)	0.242721	0.354719	0.656207	0.999999	-0.16343	0.231392	SKP1	Downregulated
polyamine transport (GO:0015846)	0.34103	0.408517	0.786235	0.999999	-0.21483	0.23111	TPO2	Downregulated
positive regulation of actin cytoskeleton reorganization (GO:2000251)	0.242721	0.354719	0.656207	0.999999	-0.15644	0.221494	SPA2	Downregulated
vesicle fusion with Golgi apparatus (GO:0048280)	0.293581	0.377303	0.728895	0.999999	-0.177047	0.216989	BOS1	Downregulated
response to glucose (GO:0009749)	0.293581	0.377303	0.728895	0.999999	-0.176926	0.216841	YCK1	Downregulated
COPII-coated vesicle budding (GO:0090114)	0.293581	0.377303	0.728895	0.999999	-0.176425	0.216227	SEC16	Downregulated
autophagy of mitochondrion (GO:0000422)	0.139335	0.269962	0.852652	0.999999	-0.109645	0.216097	FIS1;ATG8;UTH1	Downregulated
protein insertion into membrane (GO:0051205)	0.242721	0.354719	0.656207	0.999999	-0.150343	0.212862	MDY2	Downregulated
regulation of macroautophagy (GO:0016241)	0.235026	0.354719	0.851305	0.999999	-0.146235	0.211757	VPS51;ATG8	Downregulated
regulation of transcription from RNA polymerase I promoter (GO:0006356)	0.26058	0.36636	0.876464	0.999999	-0.154136	0.20729	DHR2;HMO1	Downregulated
protein depolymerization (GO:0051261)	0.34103	0.408517	0.786235	0.999999	-0.186999	0.201171	COF1	Downregulated
lysine biosynthetic process via aminoadipic acid (GO:0019878)	0.242721	0.354719	0.656207	0.999999	-0.141284	0.200037	LYS20	Downregulated
nuclear-transcribed mRNA catabolic process, nonsense-mediated decay (GO:0000184)	0.235026	0.354719	0.851305	0.999999	-0.127849	0.185133	CDC33;UPF3	Downregulated
rRNA methylation (GO:0031167)	0.34103	0.408517	0.786235	0.999999	-0.170526	0.183449	SPB1	Downregulated
negative regulation of meiotic nuclear division (GO:0045835)	0.385297	0.447907	0.831463	0.999999	-0.186843	0.178201	FPR3	Downregulated
DNA repair complex assembly (GO:0090735)	0.317717	0.395889	0.759263	0.999999	-0.146487	0.167961	RAD52	Downregulated
[truncated: 251 more rows]

## Sheet: Down_GOCC_Proteome
Term	P-value	Adjusted P-value	Old P-value	Old Adjusted P-value	Z-score	Combined Score	Genes	Enrichment
[truncated: 218 more rows]

[truncated: 3 more sheets: UP_GOBP_mRNA, UP_GOCC_mRNA, 2D_1N_4N]
